# Supplementary material for: Genome-Wide CRISPR Screens Reveal ZATT as a Synthetic Lethal Target of TOP2-Poison Etoposide That Can Act in a TDP2-Independent Pathway
Source: MDPI journal article supplement (doi:10.3390/ijms24076545), 2023-03-31
Supplement: s1 [file s1]

Figure S1

A

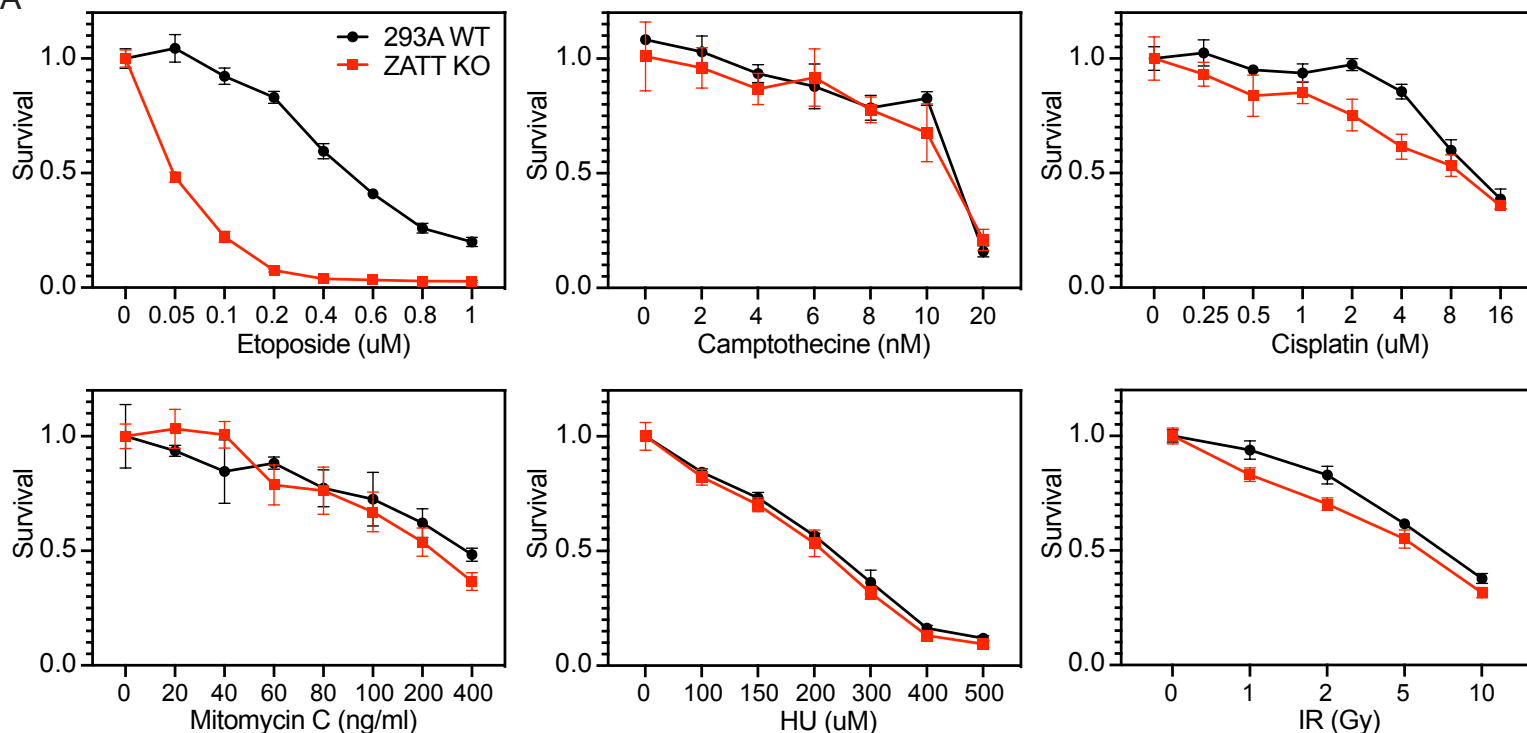

B

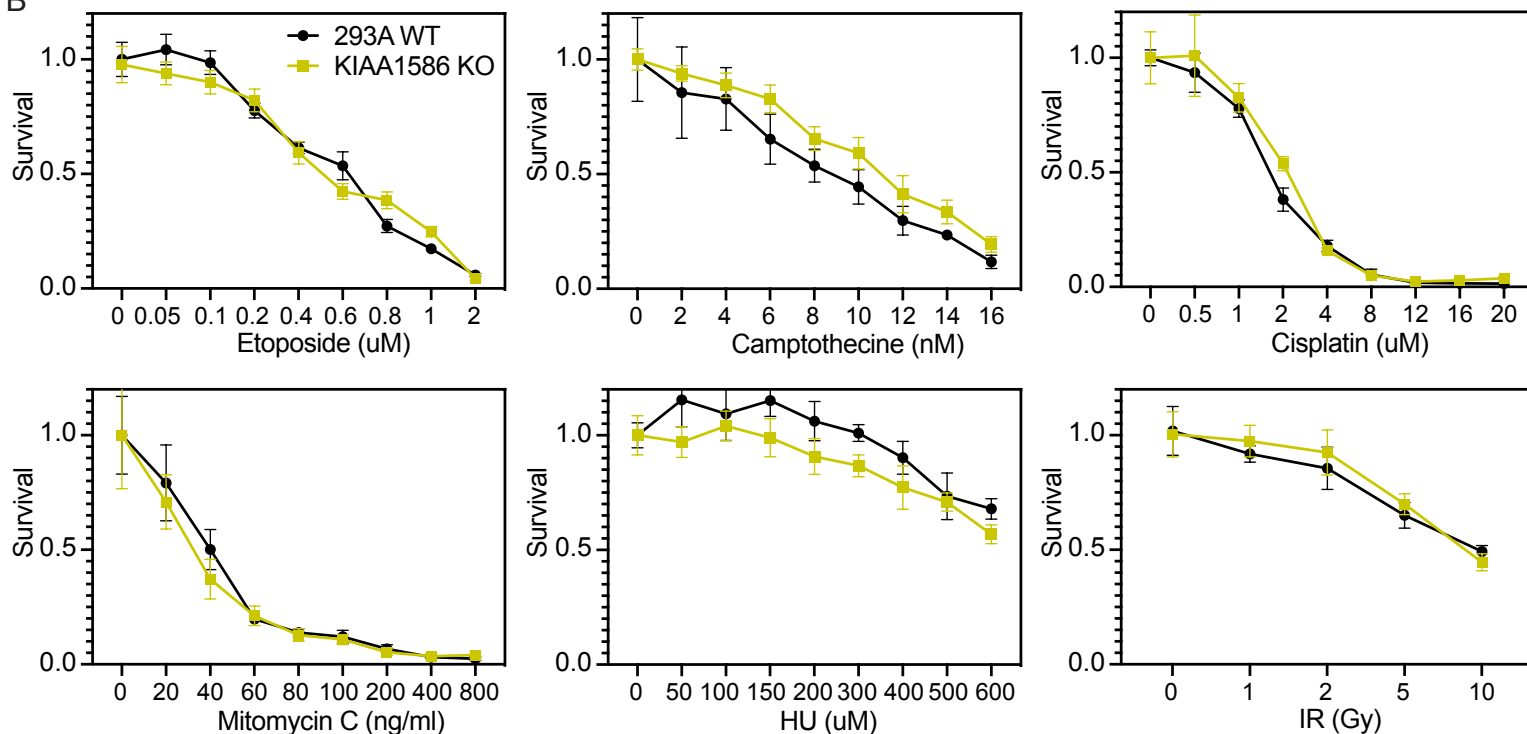

**Figure S1.** ZATT KO cells were sensitive to ETO, but not to other DNA damaging agents.

(A) Cell survival was measured using CellTiter-Glo assay in HEK293A WT and ZATT-KO cells treated with indicated drugs for 3 days. Each experiment was repeated three independent times done in triplicates each time. Data were represented as mean  $\pm$ SD. (B) KIAA1586 depletion did not change cell survival response to DNA damaging reagents. Cell survival was measured using CellTiter-Glo assay in HEK293A WT and KIAA1586 KO cells treated with indicated drugs for 3 days. Each experiment was repeated three independent times done in triplicates each time. Data were represented as mean  $\pm$ SD.

Figure S2

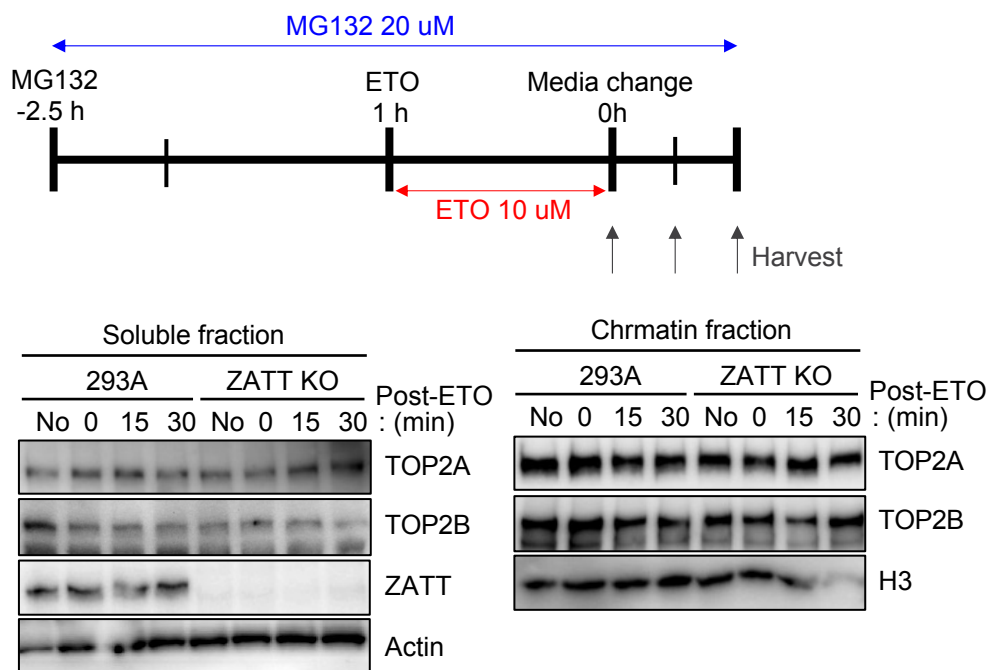

**Figure S2.** Proteolysis of TOP2 $\alpha$  was suppressed by proteasome inhibitor MG132 both in WT and ZATT KO cells. Cells were treated with 20  $\mu$ M MG132 and 10  $\mu$ M ETO for indicated time. Soluble and chromatin fraction were prepared and subjected to Western blotting with the indicated antibodies.
