# Supplementary material for: Genome-Wide CRISPR Screens Reveal ZATT as a Synthetic Lethal Target of TOP2-Poison Etoposide That Can Act in a TDP2-Independent Pathway
Source: Int J Mol Sci. 2023 Mar 31;24(7):6545. doi: 10.3390/ijms24076545 (PMC10095316; doi:10.3390/ijms24076545)
Supplement: Supplementary file 1 [file ijms-24-06545-s001.zip]

Archive with 4 entries (4 files):
- Supplementary Figure.pdf
- Table S1. Normalized sgRNA counts in the CRISPR screens.xlsx
- Table S2. Drug Z score ranking of ETO co-essential genes in 293A WT cells.xlsx
- Table S3. Drug Z score ranking of ETO co-essential genes in ZATT KO cells.xlsx
