# Supplementary material for: Genome-Wide CRISPR Screens Reveal ZATT as a Synthetic Lethal Target of TOP2-Poison Etoposide That Can Act in a TDP2-Independent Pathway
Source: Int J Mol Sci. 2023 Mar 31;24(7):6545. doi: 10.3390/ijms24076545 (PMC10095316; doi:10.3390/ijms24076545)
Supplement: Supplementary file 1 [file ijms-24-06545-s001.zip › Table S1. Normalized sgRNA counts in the CRISPR screens.xlsx]

## Sheet: JP_ZNF451withHZ293A.count_norma
sgRNA	Gene	S1-WT T0	S2-WT DMSO 1	S3-WT DMSO 2	S4-WT DMSO 3	S5-WT ETO 1	S6-WT ETO 2	S7-WT ETO 3	S8 -ZATT KO T0	S9-ZATT KO DMSO 1	S10-ZATT KO DMSO 2	S11-ZATT KO DMSO 3	S12-ZATT KO ETO 1	S13-ZATT KO ETO 2	S14-ZATT KO ETO 3
TKOv3_45424	PIGN	355.434	363.869	334.768	432.371	596.025	510.234	479.083	457.019	548.568	418.028	410.974	422.801	536.393	437.246
TKOv3_46637	POLQ	108.046	113.094	89.6571	127.516	165.811	94.16	93.5391	108.199	102.399	74.2777	138.299	133.027	164.538	201.079
TKOv3_31267	KIAA1875	84.9464	88.5087	99.0566	34.6235	76.1836	45.8728	13.8275	11.3044	86.308	53.5491	90.2378	35.0615	77.8812	76.9229
TKOv3_19619	EPX	191.502	161.037	181.483	225.475	234.825	296.161	396.118	251.118	238.444	217.651	173.61	238.212	265.454	172.739
TKOv3_42867	ORC2	241.427	245.858	46.2746	55.7353	19.7181	109.451	91.9123	45.2174	64.3653	100.189	68.6592	49.4986	28.5199	37.7867
TKOv3_60776	TEX22	152.009	194.227	168.469	195.918	161.33	178.663	112.247	255.963	128.731	207.287	203.035	229.962	194.154	345.478
TKOv3_30970	KIAA0100	120.713	105.719	82.4267	87.8254	129.064	37.0202	67.5108	53.292	87.7708	96.7338	147.127	91.7786	71.2997	149.797
TKOv3_22239	FGGY	198.208	177.017	261.741	303.166	515.36	314.671	181.385	369.006	185.782	169.284	299.158	197.994	236.934	236.167
TKOv3_05449	BCAS3	145.303	131.534	98.3336	112.315	173.878	86.9169	113.06	92.0498	143.359	165.829	122.606	185.62	130.533	106.612
TKOv3_32500	LARS2	197.463	227.418	28.9216	13.5116	14.3404	46.6776	7.32045	33.1056	78.9938	84.642	67.6784	65.9981	97.6257	29.6895
TKOv3_70047	ZNF696	262.291	258.15	208.236	230.542	300.253	177.053	342.434	238.199	299.884	321.294	236.384	241.306	245.71	255.06
TKOv3_41098	NUP98	150.519	172.1	33.2599	38.8458	28.6809	81.2834	21.148	31.4907	30.7198	36.2752	26.4828	42.2801	15.3568	24.2914
TKOv3_45015	PGM2	199.699	173.33	264.633	364.813	356.718	434.585	282.244	347.205	244.296	205.559	245.211	260.899	253.388	263.157
TKOv3_20185	EYS	361.395	387.226	318.138	416.326	377.333	387.907	387.984	357.702	386.192	424.938	362.913	340.303	489.225	426.45
TKOv3_17892	DTX1	292.842	220.043	302.231	247.431	415.873	415.27	392.051	413.416	292.569	240.107	282.484	272.242	314.815	358.974
TKOv3_44357	PDDC1	331.589	374.933	189.437	262.632	250.061	226.145	178.944	264.037	253.073	276.382	199.112	300.085	243.516	205.128
TKOv3_32549	LBX1	210.876	163.495	152.562	149.472	197.181	355.715	229.374	202.671	125.805	221.106	200.093	204.182	208.414	225.371
TKOv3_62018	TMEM169	235.466	196.686	263.187	344.546	163.123	195.563	193.585	251.118	155.062	229.743	151.05	227.9	102.013	183.535
TKOv3_33317	LMTK2	198.208	197.915	195.944	163.828	207.04	99.7935	202.533	146.149	140.433	155.465	140.261	180.464	170.022	191.633
TKOv3_03503	ARHGAP22	210.131	196.686	100.503	133.427	120.101	57.9446	128.515	217.205	136.045	153.738	106.912	179.432	130.533	98.5153
TKOv3_56167	SLC5A6	177.344	204.062	182.929	127.516	143.404	204.416	108.18	151.801	84.8452	112.28	157.916	119.622	202.93	113.36
TKOv3_23803	GBX2	202.679	194.227	156.177	163.828	276.053	197.977	263.536	252.733	178.467	229.743	187.342	151.589	166.732	165.992
TKOv3_07690	C1orf64	205.66	186.852	119.302	50.6685	103.968	75.6499	34.9755	38.7578	150.673	110.553	134.376	155.714	115.176	79.622
TKOv3_21324	FAM83E	230.25	188.081	111.348	25.3342	66.3245	126.351	75.6447	83.9752	84.8452	145.101	103.97	190.776	98.7226	114.71
TKOv3_13363	CNTF	171.383	162.266	242.219	198.452	173.878	163.372	205.786	135.652	177.005	190.013	181.456	181.495	167.828	155.195
TKOv3_62933	TNFRSF1A	320.412	318.386	238.604	234.764	161.33	156.933	156.983	138.882	177.005	165.829	235.403	214.494	244.613	222.672
TKOv3_41654	OR10Q1	225.034	217.584	255.234	184.096	150.575	257.532	244.015	205.093	204.799	229.743	222.652	235.118	228.159	256.41
TKOv3_61034	THADA	175.854	173.33	159.792	166.362	136.234	344.448	178.944	136.46	206.261	196.922	175.571	194.901	156.859	226.72
TKOv3_59236	SUSD2	184.051	184.393	260.295	271.921	367.474	360.544	461.188	424.721	231.13	224.561	220.69	275.336	253.388	283.4
TKOv3_40583	NRG3	212.366	216.355	277.648	247.431	218.692	346.863	301.765	286.646	337.918	354.115	366.836	331.022	296.168	306.342
TKOv3_29074	IL2RB	97.6139	137.68	129.424	167.206	146.093	131.18	141.529	121.118	99.4736	91.5516	181.456	77.3416	81.1719	143.05
TKOv3_04513	ATM	125.929	124.158	42.6594	85.292	106.657	46.6776	6.50707	33.1056	65.8281	53.5491	78.4677	24.7493	19.7445	33.7381
TKOv3_29578	IQCH	245.898	258.15	300.062	285.433	225.862	222.926	218.8	294.721	277.941	222.833	286.407	314.522	345.529	278.002
TKOv3_47154	PPP1CC	137.107	140.139	185.099	73.4693	84.2501	70.0164	131.768	151.801	105.325	122.645	89.257	167.058	98.7226	144.399
TKOv3_35446	MCFD2	220.563	224.96	292.109	392.681	402.429	419.294	290.378	437.64	275.015	348.933	332.507	389.801	222.674	419.702
TKOv3_29575	IQCH	213.111	239.711	278.371	222.941	206.144	225.34	219.614	171.988	266.238	234.925	252.077	303.179	219.384	279.352
TKOv3_00097	AARSD1	186.286	245.858	141.716	122.449	172.085	98.9887	201.719	147.764	193.096	236.652	187.342	175.308	108.595	152.496
TKOv3_52278	RRM1	120.713	161.037	7.95345	11.8226	34.0585	36.2154	30.9086	3.22982	4.38854	17.2739	37.2721	5.1561	1.09692	4.04857
TKOv3_03224	APOC1	195.973	95.8845	70.858	37.1569	96.798	50.7015	80.525	114.658	83.3823	36.2752	92.1995	78.3728	51.5551	126.855
TKOv3_59411	SYNE4	231.74	277.819	180.037	221.252	161.33	181.882	279.804	289.876	276.478	222.833	257.962	275.336	269.842	361.673
TKOv3_59851	TAPBP	166.912	131.534	120.025	179.029	189.115	101.403	315.593	130	179.93	150.283	173.61	183.557	179.895	174.089
TKOv3_30161	JOSD1	93.8882	86.0502	65.7967	100.493	69.9096	57.9446	168.37	128.385	105.325	89.8242	81.4102	117.559	161.247	72.8743
TKOv3_52746	SACS	198.208	201.603	336.214	248.276	330.726	297.771	191.145	239.814	270.627	276.382	204.016	232.025	274.229	226.72
TKOv3_05367	BAZ2B	291.351	292.571	303.677	214.497	198.974	263.165	312.339	399.69	200.41	202.104	199.112	292.867	264.357	186.234
TKOv3_10808	CD3D	304.019	260.609	319.584	316.678	311.905	341.229	239.135	219.627	207.724	164.102	137.318	228.931	240.225	241.565
TKOv3_62496	TMEM50A	190.012	253.233	578.433	606.333	914.203	626.124	345.688	273.727	307.198	236.652	215.786	288.742	314.815	217.274
TKOv3_32632	LCN8	347.982	410.582	203.898	266.854	205.248	200.392	156.17	255.963	108.251	119.19	170.667	123.746	131.63	121.457
TKOv3_02091	ALG11	164.677	264.297	164.13	188.318	129.064	144.057	84.5919	138.882	89.2337	157.192	167.725	155.714	170.022	145.749
TKOv3_36698	MNAT1	282.41	239.711	337.66	313.3	354.03	313.867	260.283	403.727	318.901	326.476	224.614	240.274	258.873	222.672
TKOv3_53179	SCML2	233.23	197.915	219.081	250.809	269.78	206.83	288.751	328.634	285.255	243.562	269.733	229.962	243.516	238.866
TKOv3_10495	CCNO	213.111	283.965	303.677	289.655	298.46	364.568	294.445	418.261	263.313	290.201	266.79	219.65	253.388	221.322
TKOv3_58698	STAU2	305.509	309.781	329.707	232.231	286.809	314.671	379.037	189.752	383.266	309.203	387.434	343.397	327.978	512.819
TKOv3_22771	FOXK1	252.604	260.609	227.758	303.166	201.662	229.364	257.843	192.982	242.833	229.743	253.058	150.558	217.19	228.07
TKOv3_53178	SCML2	191.502	195.457	218.358	129.205	133.545	126.351	164.303	231.739	187.244	221.106	204.997	183.557	209.511	205.128
TKOv3_24344	GJB6	247.388	115.553	209.682	167.206	380.022	166.591	400.998	353.665	134.582	181.376	96.1229	207.275	111.886	134.952
TKOv3_45233	PHLDB1	375.553	361.411	475.038	488.106	322.66	275.237	384.73	359.317	377.415	456.031	382.53	471.268	431.089	364.372
TKOv3_15982	DCTN4	137.852	119.241	169.915	266.854	182.841	111.865	220.427	115.466	254.535	153.738	180.476	149.527	218.287	156.545
TKOv3_17593	DPH6	334.57	308.551	437.44	364.813	330.726	330.767	361.956	367.392	460.797	342.023	437.457	447.55	438.767	512.819
TKOv3_09113	CALHM3	247.388	249.545	168.469	224.63	161.33	138.423	99.2328	189.752	157.988	269.473	256.001	232.025	175.507	182.186
TKOv3_54694	SIGLEC5	225.779	215.125	253.064	106.404	180.152	176.248	151.289	211.553	320.364	250.471	327.603	359.896	333.463	283.4
TKOv3_66318	VDR	143.068	169.642	246.557	107.248	153.263	104.622	208.226	168.758	165.302	136.464	138.299	101.06	161.247	176.788
TKOv3_18323	ECI2	91.6527	94.6552	101.226	84.4475	199.87	144.057	89.4722	114.658	84.8452	105.371	104.951	129.934	141.502	184.885
TKOv3_22866	FPR1	237.701	237.253	318.138	158.761	224.069	439.413	187.892	246.273	362.786	269.473	233.441	234.087	285.199	275.303
TKOv3_20547	FAM133A	266.762	245.858	352.844	446.727	403.325	348.472	438.414	364.969	255.998	240.107	385.472	287.711	266.551	384.615
TKOv3_61149	THOC2	159.461	137.68	89.6571	32.09	77.9761	78.869	52.0565	33.9131	65.8281	50.0943	55.9082	38.1552	54.8459	40.4857
TKOv3_01797	AIPL1	157.971	141.368	101.226	144.405	125.479	78.869	170.811	178.447	103.862	112.28	92.1995	160.87	154.665	160.593
TKOv3_26134	GTPBP2	247.388	245.858	333.322	288.81	345.067	218.902	262.723	222.857	226.741	209.014	210.882	149.527	255.582	263.157
TKOv3_24481	GLIS2	133.381	115.553	112.071	119.071	86.9389	67.602	46.3629	61.3665	155.062	84.642	83.3719	68.0606	70.2027	40.4857
TKOv3_38012	MX1	198.954	205.291	271.14	362.28	200.766	252.703	186.265	314.1	276.478	329.931	191.265	308.335	280.811	282.051
TKOv3_63732	TRIB2	252.604	242.17	243.665	325.967	238.41	467.581	468.509	398.075	295.495	257.381	305.043	226.869	377.34	326.585
TKOv3_22048	FEV	181.815	169.642	113.517	136.805	178.359	254.312	172.437	140.497	134.582	112.28	100.046	187.682	152.472	167.341
TKOv3_47465	PQLC3	236.956	248.316	318.138	343.701	286.809	284.09	337.554	356.895	210.65	443.939	265.809	550.672	291.78	245.614
TKOv3_28689	IGFBP5	157.971	100.802	153.285	173.962	129.96	64.3829	65.0707	107.391	89.2337	100.189	146.146	77.3416	95.4319	91.7677
TKOv3_51772	ROM1	160.206	168.412	174.976	191.696	141.612	140.033	151.289	104.162	194.559	153.738	102.008	117.559	115.176	103.913
TKOv3_35023	MAPK1IP1L	104.32	56.5472	58.5663	88.6699	60.9469	41.8489	62.6305	88.8199	65.8281	22.4561	50.0231	45.3737	60.3305	56.68
TKOv3_09338	CAPRIN2	198.954	178.247	171.361	94.5812	156.849	193.953	124.448	109.006	250.147	146.828	213.824	206.244	187.573	260.458
TKOv3_63434	TPPP2	182.56	154.89	240.773	200.985	262.609	197.977	137.462	125.963	185.782	107.098	165.763	154.683	130.533	246.963
TKOv3_32987	LIAS	270.487	244.628	146.777	154.539	114.724	185.906	222.867	232.547	242.833	226.288	233.441	171.183	340.045	184.885
TKOv3_19770	ERMARD	382.259	335.596	506.852	361.435	489.368	416.879	440.041	427.951	323.289	430.12	360.951	325.866	288.489	398.11
TKOv3_67080	WDR81	261.546	248.316	271.863	322.589	233.928	258.336	206.599	283.416	156.525	196.922	309.947	156.746	199.639	309.041
TKOv3_27518	HOMER3	122.949	151.202	58.5663	65.869	82.4575	78.869	88.6588	73.4783	124.342	72.5503	87.2953	114.466	80.075	133.603
TKOv3_09228	CAMSAP2	203.424	242.17	315.246	304.855	267.091	262.36	323.727	214.783	185.782	179.648	184.399	218.619	196.348	164.642
TKOv3_19987	EVC2	262.291	259.38	365.859	356.368	273.365	263.165	362.769	322.982	273.552	272.927	329.564	360.927	241.322	300.944
TKOv3_05039	AZGP1	277.194	314.698	417.918	351.302	285.913	307.428	298.512	220.435	324.752	221.106	263.848	212.431	211.705	310.391
TKOv3_19668	ERC2	160.206	231.106	214.02	261.787	281.431	155.324	222.054	202.671	248.684	167.557	228.537	188.713	196.348	180.836
TKOv3_00673	ACOT8	92.3979	98.343	104.118	114.004	121.894	122.327	164.303	152.609	114.102	150.283	103.97	129.934	110.789	98.5153
TKOv3_03438	ARFIP2	91.6527	99.5723	83.1497	110.626	70.8059	79.6738	23.5881	113.851	77.5309	62.186	86.3144	53.6235	63.6212	67.4762
TKOv3_34562	MAG	233.23	168.412	229.927	173.117	216.003	209.244	200.906	155.031	263.313	200.377	189.303	183.557	232.547	199.73
TKOv3_23745	GATSL3	280.919	298.717	276.202	293.033	188.218	296.966	222.867	293.913	260.387	260.836	286.407	338.24	269.842	307.692
TKOv3_31541	KLC2	236.211	270.443	130.147	260.098	260.817	179.467	143.156	150.186	229.667	126.099	142.223	203.15	182.088	112.011
TKOv3_42820	OR9A4	395.672	416.729	317.415	427.304	304.734	348.472	558.795	564.41	403.746	383.48	391.357	420.738	420.12	371.119
TKOv3_53408	SDHAF2	194.483	186.852	133.763	140.183	158.641	91.7456	89.4722	71.056	149.21	110.553	158.897	103.122	123.952	107.962
TKOv3_63705	TREX1	233.975	194.227	450.455	244.898	138.923	305.819	376.597	259.193	276.478	248.744	183.418	243.368	184.282	279.352
TKOv3_07469	C1orf101	221.308	178.247	290.663	162.984	406.014	227.754	300.952	264.037	179.93	238.38	280.522	208.307	205.124	256.41
TKOv3_30022	ITPRIPL1	292.097	326.991	286.324	343.701	366.578	318.695	209.853	260	320.364	257.381	193.227	242.337	313.719	228.07
TKOv3_42604	OR6B3	89.4173	95.8845	180.037	87.8254	142.508	151.3	214.733	176.025	160.913	184.831	182.437	176.339	185.379	124.156
TKOv3_57713	SPCS1	480.618	431.48	437.44	555.664	577.203	321.11	756.447	625.777	438.854	412.846	510.04	529.016	487.032	618.082
TKOv3_37568	MSLN	234.72	218.813	163.407	217.03	156.849	107.037	155.356	117.888	172.616	196.922	153.993	153.652	160.15	211.875
TKOv3_08092	C3orf35	237.701	199.145	201.005	255.031	354.926	282.48	405.065	263.23	285.255	195.195	228.537	200.057	235.837	199.73
TKOv3_34873	MAP2K6	295.822	399.519	271.14	295.566	356.718	295.357	339.181	311.677	352.546	348.933	460.998	399.082	443.155	537.111
TKOv3_59383	SYNC	245.898	309.781	175.699	229.697	172.982	291.333	153.729	407.764	258.924	283.292	221.671	290.804	357.595	259.109
TKOv3_39035	NDP	187.031	217.584	292.109	363.124	203.455	232.583	346.501	255.155	242.833	183.103	277.579	223.775	615.371	241.565
TKOv3_15248	CXorf64	218.327	207.75	200.282	157.917	215.107	349.277	226.121	234.162	203.336	177.921	246.192	126.84	207.317	195.681
TKOv3_12270	CHRD	258.565	298.717	208.959	218.719	247.373	182.686	261.91	230.124	263.313	243.562	291.311	236.15	311.525	232.118
TKOv3_68028	ZC3H12B	277.939	252.004	204.621	197.607	216.003	195.563	261.91	171.988	238.444	183.103	203.035	172.214	280.811	248.313
TKOv3_42238	OR51A7	152.755	183.164	263.91	173.117	291.29	255.922	239.135	272.112	307.198	186.558	206.958	155.714	171.119	232.118
TKOv3_62180	TMEM202	226.524	212.667	222.697	274.454	252.75	348.472	289.565	278.572	254.535	224.561	156.935	183.557	213.899	190.283
TKOv3_47842	PRM2	169.148	137.68	60.7355	68.4025	60.0506	79.6738	68.3242	66.2112	172.616	195.195	140.261	139.215	139.309	126.855
TKOv3_48987	PTRHD1	214.602	175.788	326.092	190.007	210.625	147.276	159.423	218.013	216.501	196.922	91.2187	119.622	161.247	155.195
TKOv3_31978	KPNA7	122.204	149.973	118.579	99.648	134.442	163.372	212.293	83.1678	90.6965	84.642	104.951	68.0606	98.7226	90.4182
TKOv3_47447	PPWD1	201.189	267.985	10.8456	10.9782	10.7553	10.4622	30.0952	16.9565	19.017	5.18217	8.82761	1.03122	3.29075	1.34952
TKOv3_30485	KCNH5	205.66	147.515	186.545	162.984	155.056	251.898	273.297	175.218	258.924	252.199	159.878	261.93	299.459	237.516
TKOv3_31869	KLKB1	319.667	301.176	291.386	344.546	542.248	465.971	593.77	412.609	264.775	380.026	358.99	339.272	288.489	373.818
TKOv3_34534	MAF	295.077	299.946	284.155	252.498	328.038	373.421	308.272	213.168	244.296	278.11	260.905	295.96	258.873	280.701
TKOv3_44368	PDE12	154.99	132.763	63.6276	34.6235	28.6809	70.8212	13.8275	7.26709	93.6222	57.0038	126.529	76.3103	137.115	112.011
TKOv3_24423	GLCCI1	277.939	237.253	304.4	300.633	390.777	335.596	361.956	266.46	277.941	302.293	308.966	216.556	333.463	210.526
TKOv3_30156	JMY	154.99	153.661	192.329	175.651	253.647	148.081	45.5495	143.727	159.45	105.371	73.5634	138.184	186.476	112.011
TKOv3_14933	CTSB	149.774	156.12	227.758	219.563	204.351	279.261	331.861	286.646	108.251	162.375	219.709	228.931	175.507	230.769
TKOv3_28983	IL1R2	196.718	191.769	217.635	210.274	156.849	209.244	263.536	269.69	231.13	248.744	261.886	191.807	243.516	186.234
TKOv3_67640	YBX3	242.917	181.935	285.601	202.674	230.343	238.217	199.279	146.149	204.799	146.828	269.733	210.369	149.181	194.332
TKOv3_63375	TPGS1	324.138	390.914	237.881	220.408	300.253	272.018	270.043	212.36	337.918	359.297	296.215	310.397	450.833	257.759
TKOv3_23632	GAPT	175.854	217.584	203.898	215.341	200.766	200.392	259.469	206.708	171.153	243.562	210.882	154.683	197.445	184.885
TKOv3_06636	C11orf58	139.342	178.247	141.716	162.139	104.864	57.9446	29.2818	49.2547	121.416	143.373	136.338	164.995	128.339	105.263
TKOv3_08638	C8orf87	255.584	266.755	243.665	302.322	363.889	338.815	261.096	457.826	232.593	317.84	256.982	233.056	243.516	283.4
TKOv3_47986	PRPF31	150.519	159.807	79.5345	180.718	120.997	53.1159	59.377	109.006	81.9195	84.642	112.797	92.8099	60.3305	94.4667
TKOv3_48861	PTPN21	361.395	351.576	336.937	254.187	373.748	385.493	488.03	331.056	352.546	317.84	368.798	320.71	342.238	398.11
TKOv3_66415	VKORC1	170.638	148.744	174.976	170.584	215.107	119.108	126.888	200.249	215.039	174.466	198.131	219.65	185.379	164.642
TKOv3_50843	RGN	298.058	274.131	331.876	386.77	368.37	260.751	359.516	251.926	342.306	278.11	345.258	301.116	354.304	296.895
TKOv3_60114	TBC1D32	146.793	199.145	244.388	283.744	250.958	239.021	252.962	317.329	187.244	196.922	307.986	160.87	164.538	224.021
TKOv3_07737	C20orf144	195.973	181.935	193.052	111.471	166.708	261.555	90.2856	139.69	201.873	298.838	236.384	184.589	201.833	139.001
TKOv3_63704	TREX1	345.002	324.532	409.241	279.521	291.29	269.603	516.499	281.801	260.387	281.564	345.258	299.054	251.194	380.566
TKOv3_11148	CDH1	230.25	224.96	199.559	200.141	170.293	214.878	213.107	223.665	255.998	224.561	197.15	237.181	272.036	230.769
TKOv3_43088	OTUD6A	280.174	285.195	373.812	361.435	439.176	353.301	483.15	287.454	336.455	247.017	334.468	282.554	358.692	338.731
TKOv3_38603	NAE1	163.187	173.33	143.162	153.694	101.279	187.515	95.9793	146.957	112.639	98.4612	155.954	135.09	152.472	121.457
TKOv3_07740	C20orf144	418.771	408.124	379.597	423.082	249.165	457.119	394.491	388.385	516.385	462.94	695.42	430.019	420.12	406.207
TKOv3_62262	TMEM222	82.711	114.324	83.8728	33.779	88.7315	99.7935	116.314	61.3665	83.3823	60.4586	68.6592	97.966	72.3966	43.1848
TKOv3_13358	CNTD2	251.859	237.253	207.513	166.362	190.907	253.508	207.413	240.621	201.873	236.652	208.92	259.868	243.516	265.856
TKOv3_21989	FDXACB1	118.478	97.1137	201.728	203.518	266.194	241.436	108.18	327.019	172.616	222.833	153.993	189.745	153.568	121.457
TKOv3_27236	HIVEP1	191.502	170.871	153.285	108.937	157.745	138.423	132.582	172.795	136.045	160.647	210.882	131.996	132.727	217.274
TKOv3_09024	CACTIN	202.679	291.341	45.5516	95.4257	79.7687	49.8967	42.2959	44.41	52.6625	48.3669	12.751	38.1552	38.3921	39.1362
TKOv3_35534	MCTP1	185.541	192.998	126.532	171.428	160.434	181.077	87.032	140.497	108.251	152.01	183.418	112.403	71.2997	134.952
TKOv3_01251	ADCY8	157.971	222.501	191.606	215.341	192.7	267.189	236.695	281.801	232.593	171.011	223.633	167.058	189.767	180.836
TKOv3_21550	FAXDC2	123.694	183.164	255.234	159.606	192.7	185.101	185.451	147.764	119.953	115.735	139.28	103.122	241.322	132.253
TKOv3_15020	CUBN	172.873	137.68	156.9	205.207	155.056	230.974	244.015	192.982	156.525	157.192	189.303	214.494	187.573	205.128
TKOv3_40957	NUDT22	185.541	167.183	151.839	143.561	107.553	89.3313	129.328	92.8572	254.535	134.736	161.84	158.808	150.278	107.962
TKOv3_32445	LANCL2	170.638	180.705	346.337	393.525	323.556	262.36	283.057	254.348	184.319	214.196	207.939	181.495	176.604	218.623
TKOv3_51888	RPGRIP1L	419.516	422.875	591.448	681.491	554.796	564.155	557.981	663.727	738.738	661.59	609.105	735.26	575.882	734.142
TKOv3_57946	SPOP	295.822	306.093	355.013	320.056	282.327	276.042	257.843	289.069	292.569	323.022	300.139	348.553	230.353	246.963
TKOv3_04641	ATP2B3	415.045	334.366	383.212	183.251	224.966	422.513	312.339	259.193	299.884	307.475	303.081	232.025	234.74	268.555
TKOv3_02629	ANKRD30A	233.23	282.736	255.957	212.808	247.373	165.786	201.719	335.093	286.718	295.383	293.273	234.087	410.247	296.895
TKOv3_26584	HCRT	201.189	237.253	182.206	175.651	218.692	232.583	209.04	213.168	283.792	183.103	232.46	240.274	157.956	219.973
TKOv3_35339	MBLAC2	309.235	311.01	258.849	289.655	451.724	296.161	364.396	282.609	283.792	312.657	245.211	315.554	327.978	334.682
TKOv3_24723	GNAI3	257.075	274.131	323.199	208.585	397.051	345.253	270.857	432.795	219.427	252.199	274.637	230.993	332.366	377.867
TKOv3_01490	AFF1	132.636	141.368	146.054	126.671	228.551	288.918	125.261	189.752	220.89	134.736	198.131	130.965	206.221	160.593
TKOv3_51862	RPE	143.813	168.412	72.3041	48.1351	89.6278	45.8728	82.9651	90.4348	27.7941	43.1847	24.5211	80.4352	21.9384	62.0781
TKOv3_01243	ADCY6	154.99	217.584	154.008	100.493	161.33	148.081	143.969	197.019	115.565	152.01	183.418	161.902	164.538	157.894
TKOv3_29117	IL36RN	272.723	217.584	327.538	234.764	232.136	253.508	183.825	312.485	313.049	312.657	293.273	316.585	285.199	284.75
TKOv3_57532	SPAG6	110.281	114.324	124.363	73.4693	132.649	134.399	82.9651	175.218	125.805	226.288	148.108	253.68	206.221	132.253
TKOv3_55760	SLC35A5	142.323	126.617	91.1032	125.827	77.0799	57.9446	83.7785	73.4783	67.291	51.8217	102.008	89.7162	179.895	149.797
TKOv3_36686	MMS19	271.978	314.698	249.449	181.562	226.758	293.747	122.821	168.758	244.296	319.567	338.392	304.21	159.053	229.419
TKOv3_02610	ANKRD26	159.461	98.343	98.3336	121.604	74.391	123.937	174.877	134.845	131.656	155.465	109.855	142.308	162.344	112.011
TKOv3_21458	FAP	341.276	280.278	396.95	367.347	406.014	313.062	448.174	318.944	419.837	300.566	357.028	338.24	307.137	294.196
TKOv3_33825	LRRC55	136.361	146.285	185.822	114.004	114.724	125.547	142.342	159.068	213.576	205.559	185.38	151.589	123.952	134.952
TKOv3_24097	GFRA3	158.716	159.807	222.697	125.827	157.745	139.228	181.385	139.69	146.285	160.647	160.859	156.746	240.225	139.001
TKOv3_32988	LIAS	120.713	119.241	58.5663	55.7353	45.7102	58.7494	47.1762	58.9441	29.2569	43.1847	53.9465	59.8108	66.912	48.5829
TKOv3_26202	GUCY2D	153.5	105.719	108.456	171.428	147.886	169.81	125.261	169.565	130.193	74.2777	95.142	102.091	106.401	126.855
TKOv3_01440	ADRM1	432.929	398.289	501.067	352.146	452.62	406.417	568.555	406.149	418.374	509.58	459.036	456.831	426.701	481.78
TKOv3_50573	REG4	289.861	232.335	207.513	207.741	222.277	247.874	247.269	182.485	193.096	152.01	182.437	195.932	218.287	207.827
TKOv3_47683	PRIMPOL	305.509	285.195	307.292	451.794	337.897	387.907	417.266	445.715	373.026	291.929	448.247	384.645	311.525	522.266
TKOv3_46373	PMS2	248.133	240.94	278.371	217.875	286.809	168.2	214.733	230.124	267.701	217.651	222.652	215.525	233.643	164.642
TKOv3_04356	ATAD2	177.344	116.782	275.479	356.368	201.662	293.747	201.719	332.671	229.667	217.651	153.993	205.213	217.19	125.506
TKOv3_36719	MNX1	181.07	252.004	263.187	170.584	229.447	164.176	149.663	154.224	147.748	176.194	213.824	181.495	155.762	195.681
TKOv3_55730	SLC34A1	172.128	147.515	240.05	211.963	214.21	102.208	147.222	194.596	241.37	209.014	149.089	145.402	131.63	148.448
TKOv3_31771	KLHL4	310.725	265.526	271.14	285.433	286.809	210.049	263.536	262.423	257.461	245.289	226.575	227.9	182.088	255.06
TKOv3_05979	BOC	182.56	258.15	240.773	220.408	228.551	226.95	191.959	125.963	169.69	200.377	214.805	281.523	184.282	255.06
TKOv3_12283	CHRM1	322.647	298.717	172.084	207.741	186.426	290.528	157.796	311.677	247.221	293.656	317.794	252.649	245.71	245.614
TKOv3_68532	ZIK1	134.871	148.744	181.483	81.9141	130.857	186.71	92.7257	55.7143	109.714	96.7338	110.836	81.4664	148.084	141.7
TKOv3_00725	ACR	196.718	167.183	174.976	212.808	205.248	156.933	353.008	179.255	185.782	217.651	168.705	222.744	179.895	221.322
TKOv3_27552	HOXA1	171.383	197.915	271.863	230.542	256.335	169.005	227.747	161.491	286.718	195.195	189.303	193.87	318.106	164.642
TKOv3_35323	MBD6	108.791	92.1966	46.2746	92.0478	95.0054	42.6537	21.9614	46.0249	78.9938	107.098	96.1229	122.715	95.4319	63.4277
TKOv3_69721	ZNF574	108.046	148.744	10.1226	13.5116	9.85905	8.04786	26.0283	24.2236	10.2399	6.90956	1.96169	11.3434	23.0353	9.44667
TKOv3_17374	DNM1	169.893	199.145	161.961	106.404	123.686	177.053	146.409	159.876	103.862	105.371	157.916	172.214	173.313	156.545
TKOv3_11132	CDCA7L	280.174	312.239	453.347	506.685	448.139	524.721	360.329	476.398	318.901	438.757	303.081	446.519	451.93	425.1
TKOv3_23045	FSTL4	178.835	131.534	205.344	232.231	131.753	123.132	141.529	216.398	157.988	224.561	136.338	147.465	163.441	205.128
TKOv3_30151	JMJD8	255.584	351.576	240.05	168.895	246.476	179.467	108.993	192.174	143.359	233.197	109.855	199.026	183.185	151.147
TKOv3_03867	ARMC3	127.42	114.324	218.358	184.096	271.572	172.224	286.311	154.224	136.045	210.741	244.231	233.056	139.309	199.73
TKOv3_53940	SERPINB4	266.016	285.195	345.614	354.679	313.697	319.5	430.28	346.398	296.958	328.204	340.353	291.835	425.604	340.08
TKOv3_00824	ACTBL2	183.305	178.247	135.932	136.805	164.019	74.0403	234.254	166.336	182.856	169.284	191.265	126.84	220.48	156.545
TKOv3_47661	PRICKLE1	142.323	135.222	46.2746	59.1132	87.8352	42.6537	44.7361	105.776	138.971	114.008	131.433	129.934	102.013	147.098
TKOv3_35961	METTL21A	149.774	127.846	172.084	210.274	250.958	116.694	155.356	176.832	181.393	158.92	177.533	158.808	227.062	90.4182
TKOv3_31253	KIAA1731	84.9464	68.8401	49.8898	43.0682	56.4655	70.8212	73.2045	98.5094	64.3653	39.7299	58.8507	46.4049	70.2027	59.3791
TKOv3_31991	KPTN	166.912	154.89	292.832	147.783	142.508	150.495	239.948	99.3168	133.119	231.47	236.384	237.181	165.635	218.623
TKOv3_40083	NOG	175.109	190.54	157.623	223.786	135.338	153.714	204.159	117.081	131.656	158.92	213.824	167.058	156.859	244.264
TKOv3_49312	RAB11FIP3	154.245	168.412	204.621	28.7121	106.657	38.6297	50.4298	79.9379	49.7368	41.4573	28.4445	37.1239	53.749	44.5343
TKOv3_68225	ZDHHC20	146.793	120.47	183.652	264.321	210.625	271.213	204.159	341.553	163.839	167.557	187.342	158.808	108.595	125.506
TKOv3_08372	C6orf136	254.839	205.291	144.608	170.584	125.479	189.125	152.916	100.932	119.953	179.648	134.376	137.152	115.176	156.545
TKOv3_23158	FUT6	337.55	336.825	250.172	228.853	344.171	361.349	368.463	522.423	329.141	373.116	393.319	341.334	354.304	287.449
TKOv3_03632	ARHGEF18	167.657	195.457	156.177	133.427	223.173	97.3791	179.758	176.025	100.936	253.926	199.112	133.027	112.983	222.672
TKOv3_31462	KIFC1	160.206	156.12	157.623	124.138	79.7687	62.7733	91.099	121.118	71.6795	120.917	125.548	92.8099	78.9781	82.321
TKOv3_60418	TCFL5	199.699	132.763	67.2428	56.5798	66.3245	68.4068	43.1093	125.963	39.4969	96.7338	69.6401	81.4664	66.912	66.1267
TKOv3_52781	SALL4	71.5338	51.6301	108.456	153.694	61.8432	75.6499	38.229	100.124	84.8452	84.642	71.6017	77.3416	85.5596	62.0781
TKOv3_57825	SPICE1	204.17	196.686	202.452	195.074	241.995	234.998	256.216	159.876	219.427	158.92	291.311	222.744	363.08	390.013
TKOv3_31011	KIAA0319	166.912	175.788	266.802	271.921	456.205	261.555	293.631	387.578	146.285	217.651	229.518	148.496	171.119	224.021
TKOv3_09084	CALCOCO1	383.749	378.621	269.694	223.786	356.718	335.596	276.55	297.143	343.769	456.031	346.239	345.459	240.225	314.439
TKOv3_51846	RPAIN	200.444	179.476	135.932	186.629	82.4575	89.3313	105.74	123.54	163.839	160.647	133.395	102.091	132.727	110.661
TKOv3_21536	FATE1	93.143	99.5723	233.542	219.563	220.484	267.189	207.413	104.969	61.4396	139.918	134.376	94.8723	185.379	161.943
TKOv3_26994	HID1	128.165	95.8845	132.317	40.5348	138.923	72.4308	84.5919	143.727	175.542	81.1873	112.797	46.4049	80.075	95.8163
TKOv3_63110	TNRC18	257.075	216.355	248.003	237.297	256.335	251.093	217.987	292.298	275.015	255.654	226.575	306.273	262.163	272.604
TKOv3_15974	DCTN2	68.5533	72.528	39.0442	41.3793	18.8218	51.5063	88.6588	36.3354	35.1083	15.5465	21.5786	25.7805	28.5199	17.5438
TKOv3_30380	KCNAB1	128.91	152.432	158.346	221.252	152.367	242.241	183.011	164.721	156.525	136.464	161.84	162.933	213.899	201.079
TKOv3_36897	MPEG1	153.5	301.176	248.726	157.917	233.928	214.073	102.486	182.485	330.604	281.564	350.162	260.899	358.692	363.022
TKOv3_32935	LHFPL1	160.206	145.056	176.422	219.563	161.33	218.097	173.251	166.336	250.147	221.106	227.556	212.431	174.41	286.099
TKOv3_51003	RHEB	151.264	167.183	193.775	195.918	112.035	267.189	111.434	163.913	226.741	129.554	138.299	169.12	222.674	145.749
TKOv3_31229	KIAA1598	103.575	113.094	121.471	206.896	128.168	165.786	89.4722	164.721	162.376	139.918	108.874	97.966	138.212	126.855
TKOv3_45681	PJA1	204.915	180.705	248.003	161.295	205.248	223.731	161.863	167.95	212.113	215.924	205.978	239.243	168.925	286.099
TKOv3_66265	VAV3	196.718	191.769	75.1963	130.894	134.442	170.615	178.944	96.087	188.707	157.192	129.472	179.432	165.635	136.302
TKOv3_63928	TRIM63	238.446	234.794	206.79	130.049	252.75	93.3552	182.198	219.627	172.616	139.918	129.472	110.341	140.405	205.128
TKOv3_10723	CD247	333.079	325.761	251.618	242.364	290.394	247.069	242.388	251.926	267.701	266.018	205.978	235.118	264.357	198.38
TKOv3_03379	ARAP3	283.155	336.825	298.616	207.741	225.862	168.2	161.05	152.609	223.816	193.468	120.644	189.745	143.696	139.001
TKOv3_35441	MCF2L	234.72	213.896	206.067	158.761	173.878	148.885	217.987	258.385	216.501	210.741	190.284	148.496	247.903	165.992
TKOv3_25789	GRIN2C	236.211	200.374	135.932	106.404	93.2129	141.642	141.529	78.323	133.119	196.922	153.012	122.715	130.533	217.274
TKOv3_20799	FAM183A	145.303	189.31	78.0884	86.9809	91.4203	48.2872	89.4722	134.845	127.268	84.642	78.4677	40.2176	115.176	49.9324
TKOv3_10318	CCL14	202.679	199.145	250.172	232.231	199.87	227.754	356.262	202.671	185.782	191.74	198.131	230.993	240.225	261.808
TKOv3_20411	FAM110A	321.157	253.233	302.231	435.749	354.926	435.389	338.368	388.385	295.495	266.018	232.46	328.959	262.163	213.225
TKOv3_39200	NDUFS1	177.344	228.648	75.1963	49.824	87.8352	120.718	55.3101	66.2112	185.782	171.011	165.763	112.403	167.828	122.807
TKOv3_38208	MYL12B	175.854	177.017	130.87	147.783	166.708	214.878	70.7644	165.528	264.775	120.917	183.418	187.682	223.771	170.04
TKOv3_39228	NDUFS8	175.109	215.125	46.9977	19.4229	67.2208	72.4308	43.9227	46.8323	83.3823	133.009	116.721	55.6859	174.41	109.312
TKOv3_09701	CC2D2B	246.643	223.73	318.138	329.345	409.599	334.791	448.988	397.267	302.809	260.836	248.154	283.586	325.785	257.759
TKOv3_49192	PYURF	200.444	153.661	172.084	232.231	216.003	111.865	333.487	228.509	181.393	158.92	147.127	205.213	218.287	159.244
TKOv3_11747	CEP120	376.298	312.239	496.006	501.618	320.867	366.178	526.259	372.236	310.124	369.661	385.472	401.145	347.723	473.683
TKOv3_08539	C7orf71	190.012	163.495	330.43	219.563	214.21	183.491	324.54	322.174	209.187	222.833	213.824	214.494	170.022	225.371
TKOv3_35329	MBIP	211.621	204.062	171.361	166.362	261.713	209.244	347.315	239.006	201.873	288.474	229.518	271.211	179.895	265.856
TKOv3_35695	MED19	49.9247	57.7765	22.4143	12.6671	9.85905	15.2909	17.8944	4.03727	33.6455	24.1834	54.9274	46.4049	85.5596	89.0686
TKOv3_70660	luciferase	152.009	148.744	229.204	262.632	254.543	247.874	269.23	181.677	273.552	300.566	205.978	242.337	254.485	244.264
TKOv3_31212	KIAA1549	128.165	154.89	187.268	152.005	152.367	146.471	166.744	157.454	201.873	124.372	145.165	159.839	155.762	75.5734
TKOv3_42479	OR5B2	170.638	163.495	319.584	326.812	327.141	349.277	345.688	404.534	184.319	207.287	222.652	251.618	141.502	175.438
TKOv3_03251	APOL1	162.441	162.266	268.971	282.055	318.179	319.5	247.269	198.634	215.039	224.561	172.629	271.211	308.234	237.516
TKOv3_35030	MAPK4	331.589	271.673	489.499	374.947	391.673	369.397	292.005	341.553	305.735	354.115	364.875	382.583	318.106	408.906
TKOv3_66408	VIPR2	289.116	244.628	270.417	180.718	292.186	226.145	224.494	255.155	247.221	340.296	340.353	299.054	292.877	384.615
TKOv3_23613	GANAB	261.546	229.877	144.608	160.45	78.8724	106.232	173.251	137.267	193.096	248.744	166.744	171.183	231.45	160.593
TKOv3_06155	BRINP1	163.187	156.12	240.05	259.254	285.913	202.001	151.289	164.721	248.684	200.377	204.997	237.181	168.925	240.215
TKOv3_04650	ATP2C1	187.031	196.686	234.988	222.097	110.242	148.081	170.811	213.168	251.61	274.655	209.901	432.082	347.723	233.468
TKOv3_04971	AURKB	180.325	192.998	104.841	117.382	113.827	90.9408	68.3242	46.0249	83.3823	100.189	83.3719	157.777	97.6257	71.5248
TKOv3_10393	CCM2	401.633	381.079	871.988	1361.29	1051.33	956.891	1002.9	784.845	574.899	789.417	587.527	761.041	482.644	649.122
TKOv3_62093	TMEM183A	195.228	217.584	152.562	112.315	125.479	228.559	144.782	95.2796	98.0108	167.557	172.629	96.9348	146.987	136.302
TKOv3_56478	SLITRK1	132.636	154.89	166.299	208.585	128.168	238.217	147.222	269.69	143.359	274.655	163.801	320.71	188.67	206.477
TKOv3_27505	HOGA1	207.15	245.858	151.839	145.25	163.123	143.252	130.141	188.137	168.227	141.646	178.514	174.276	221.577	179.487
TKOv3_06883	C14orf180	379.278	395.831	329.707	206.052	316.386	319.5	414.826	347.205	264.775	248.744	229.518	302.148	228.159	240.215
TKOv3_51216	RIPPLY2	161.696	137.68	242.219	247.431	170.293	144.057	183.825	115.466	203.336	285.019	166.744	186.651	184.282	134.952
TKOv3_23495	GALK2	227.269	197.915	306.569	302.322	201.662	302.6	304.205	353.665	244.296	247.017	266.79	215.525	334.56	257.759
TKOv3_37588	MSRA	188.521	216.355	274.033	255.031	367.474	173.029	278.177	227.702	273.552	298.838	333.488	256.774	298.362	331.983
TKOv3_64796	TUBB4A	411.32	329.449	226.312	330.19	224.069	500.577	434.347	335.093	298.421	324.749	395.281	320.71	285.199	418.353
TKOv3_02789	ANO1	138.597	130.305	104.841	121.604	57.3618	73.2355	102.486	143.727	70.2167	146.828	99.0654	169.12	95.4319	145.749
TKOv3_38718	NARF	210.876	204.062	140.993	266.854	166.708	239.826	147.222	161.491	99.4736	129.554	137.318	131.996	174.41	155.195
TKOv3_35701	MED21	220.563	201.603	383.212	260.098	296.668	321.11	276.55	297.951	272.09	283.292	254.039	217.588	336.754	319.837
TKOv3_32161	KRT5	503.718	453.607	635.553	689.936	611.261	563.35	642.573	640.311	476.888	620.133	567.91	544.485	646.085	703.103
TKOv3_68843	ZNF205	152.009	133.992	32.5368	91.2033	98.5905	103.817	76.4581	38.7578	98.0108	51.8217	90.2378	135.09	145.89	120.108
TKOv3_13556	COL22A1	177.344	148.744	134.486	244.053	177.463	174.639	321.287	364.969	207.724	203.832	240.307	215.525	256.679	209.176
TKOv3_13558	COL22A1	105.81	74.9866	99.7797	178.184	96.798	100.598	164.303	179.255	109.714	146.828	89.257	152.621	107.498	117.409
TKOv3_11170	CDH16	230.25	240.94	193.052	108.937	156.849	163.372	132.582	148.572	185.782	160.647	188.322	175.308	178.798	164.642
TKOv3_28496	IFITM1	150.519	140.139	143.162	118.226	171.189	162.567	196.025	236.584	168.227	148.555	207.939	107.247	144.793	192.982
TKOv3_41135	NVL	135.616	157.349	70.135	51.513	70.8059	45.8728	87.032	46.8323	64.3653	62.186	44.1381	42.2801	52.6521	66.1267
TKOv3_26451	HAS3	264.526	217.584	245.111	310.767	214.21	204.416	246.455	231.739	337.918	266.018	250.116	371.239	242.419	244.264
TKOv3_28570	IFNW1	155.735	142.597	221.974	179.029	116.516	210.854	177.318	155.031	204.799	176.194	223.633	252.649	230.353	256.41
TKOv3_45185	PHF8	219.818	213.896	403.457	318.367	354.926	371.006	268.417	270.497	201.873	323.022	248.154	293.898	240.225	215.924
TKOv3_29476	INVS	212.366	240.94	264.633	429.838	253.647	377.445	198.466	373.851	286.718	266.018	264.828	351.646	121.758	307.692
TKOv3_47916	PROK1	374.062	361.411	487.33	456.016	462.479	591.518	425.4	546.646	582.213	428.392	488.461	552.734	612.08	601.888
TKOv3_61292	TIGIT	131.891	129.075	182.929	108.937	83.3538	118.304	183.011	88.8199	175.542	195.195	176.552	284.617	211.705	238.866
TKOv3_14339	CRIP1	201.934	174.559	273.31	333.568	260.817	311.452	241.575	298.758	286.718	241.834	211.863	268.117	187.573	215.924
TKOv3_11683	CENPF	63.3373	73.7573	81.7036	47.2906	92.3166	24.9484	43.9227	38.7578	35.1083	29.3656	99.0654	45.3737	37.2952	80.9715
TKOv3_51146	RIMS1	122.204	153.661	90.3801	150.317	229.447	152.105	270.043	108.199	197.484	148.555	131.433	156.746	219.384	128.205
TKOv3_21946	FCRL4	134.126	149.973	182.929	122.449	140.716	117.499	170.811	92.0498	160.913	177.921	221.671	181.495	190.864	192.982
TKOv3_58955	STX11	350.218	261.838	535.05	610.555	551.211	660.729	676.735	658.882	361.323	369.661	344.277	321.741	347.723	330.634
TKOv3_60051	TBC1D16	199.699	254.463	375.258	266.01	287.705	200.392	284.684	184.907	418.374	302.293	294.254	262.961	402.569	260.458
TKOv3_30223	KANK2	333.079	224.96	515.528	451.794	355.822	413.66	528.699	394.038	389.117	381.753	423.725	344.428	382.824	330.634
TKOv3_31791	KLHL6	178.835	137.68	182.206	115.693	188.218	125.547	159.423	66.2112	184.319	198.65	159.878	119.622	143.696	184.885
TKOv3_31899	KLRG1	266.016	254.463	177.868	220.408	190.011	360.544	302.579	323.789	346.695	447.394	267.771	367.115	357.595	326.585
TKOv3_42873	ORC3	267.507	253.233	50.6129	29.5566	126.375	38.6297	99.2328	31.4907	112.639	112.28	74.5443	111.372	53.749	44.5343
TKOv3_41380	OGG1	537.249	524.906	468.531	322.589	437.383	415.27	387.171	346.398	431.54	433.575	324.66	471.268	311.525	348.177
TKOv3_35566	MDGA1	201.934	164.725	138.101	133.427	223.173	195.563	215.547	210.745	185.782	219.378	186.361	170.151	235.837	153.846
TKOv3_14798	CTC1	117.733	115.553	0	0.844475	0	0	9.7606	8.07454	26.3313	8.63694	24.5211	24.7493	5.48459	25.641
TKOv3_28032	HSPA1L	236.956	200.374	224.143	331.034	265.298	314.671	251.336	157.454	194.559	245.289	238.346	177.37	214.996	179.487
TKOv3_15694	DAP3	295.077	383.538	18.076	16.045	34.0585	15.2909	30.9086	7.26709	95.0851	108.825	82.391	82.4977	84.4627	67.4762
TKOv3_68859	ZNF212	278.684	259.38	368.751	217.03	492.056	498.967	301.765	302.795	403.746	357.569	411.955	318.647	329.075	419.702
TKOv3_03652	ARHGEF28	136.361	114.324	188.714	101.337	113.827	135.204	139.902	142.919	70.2167	115.735	129.472	96.9348	117.37	139.001
TKOv3_12376	CHST11	189.267	194.227	132.317	213.652	138.923	183.491	238.321	216.398	152.136	215.924	167.725	203.15	140.405	124.156
TKOv3_45125	PHF14	198.208	271.673	202.452	268.543	217.795	208.44	228.561	248.696	236.981	141.646	243.25	141.277	201.833	206.477
TKOv3_08835	CA3	266.016	302.405	394.78	233.075	344.171	410.441	304.205	228.509	313.049	321.294	482.576	327.928	369.661	403.508
TKOv3_54959	SLC10A3	273.468	265.526	371.643	303.166	446.346	373.421	369.276	307.64	196.022	331.659	205.978	298.023	293.974	184.885
TKOv3_30654	KCNMB4	158.716	202.832	160.515	132.583	137.13	148.885	152.916	136.46	169.69	188.285	220.69	214.494	164.538	222.672
TKOv3_33703	LRRC25	156.48	173.33	143.885	87.8254	94.1091	119.108	72.3911	152.609	118.491	152.01	101.027	102.091	81.1719	110.661
TKOv3_70255	ZNF791	236.956	232.335	364.413	352.146	400.636	290.528	392.864	478.82	323.289	366.206	346.239	410.426	332.366	383.265
TKOv3_45835	PLA2G4A	172.873	173.33	106.287	164.673	100.383	206.025	117.127	148.572	134.582	107.098	144.184	199.026	191.961	148.448
TKOv3_36106	MFSD12	128.165	157.349	239.327	192.54	108.45	284.894	276.55	149.379	165.302	158.92	132.414	178.401	155.762	188.933
TKOv3_00209	ABCC1	289.116	254.463	319.584	355.524	361.2	100.598	139.902	86.3976	396.432	419.755	362.913	56.7171	44.9736	71.5248
TKOv3_41541	OPTC	169.893	212.667	117.856	92.8922	74.391	120.718	86.2187	148.572	98.0108	126.099	171.648	168.089	127.242	129.554
TKOv3_19665	ERC1	376.298	419.187	245.834	197.607	139.819	259.946	300.139	311.677	263.313	212.469	324.66	207.275	247.903	325.236
TKOv3_20837	FAM189A1	220.563	247.087	287.047	267.699	185.529	264.775	367.649	260.808	280.867	323.022	320.737	227.9	310.428	300.944
TKOv3_16107	DDX11	297.313	395.831	39.7673	30.4011	62.7394	32.1914	40.6692	37.1429	89.2337	103.643	75.5251	56.7171	52.6521	56.68
TKOv3_07334	C19orf57	282.41	290.112	309.462	264.321	224.069	252.703	157.796	188.944	264.775	354.115	238.346	366.083	272.036	287.449
TKOv3_04227	ASIC1	178.835	149.973	147.5	131.738	201.662	198.782	132.582	112.236	175.542	174.466	226.575	188.713	136.018	183.535
TKOv3_26859	HES6	240.682	169.642	133.04	251.654	206.144	153.714	138.275	133.23	100.936	269.473	140.261	170.151	141.502	230.769
TKOv3_12654	CLCNKA	204.915	232.335	243.665	103.87	144.301	132.79	192.772	167.95	244.296	150.283	218.729	195.932	223.771	172.739
TKOv3_54352	SH2B3	138.597	115.553	250.895	221.252	251.854	218.097	299.325	252.733	155.062	241.834	184.399	161.902	178.798	176.788
TKOv3_44293	PDAP1	133.381	188.081	9.39953	10.9782	14.3404	16.0957	44.7361	49.2547	26.3313	32.8204	48.0614	24.7493	31.8106	25.641
TKOv3_22096	FGD3	234.72	252.004	154.731	101.337	209.729	300.99	135.835	161.491	166.765	131.282	139.28	244.399	207.317	186.234
TKOv3_02110	ALG3	207.15	195.457	138.824	105.559	139.819	274.432	191.959	196.211	198.947	160.647	148.108	331.022	161.247	172.739
TKOv3_56662	SMCHD1	53.6504	83.5916	83.8728	128.36	108.45	88.5265	67.5108	34.7205	112.639	110.553	125.548	95.9035	77.8812	106.612
TKOv3_70160	ZNF764	306.999	261.838	242.219	235.608	207.936	218.902	228.561	192.982	235.518	207.287	238.346	215.525	312.622	145.749
TKOv3_25273	GPR139	322.647	341.742	404.903	449.261	342.378	448.266	511.618	469.938	348.158	350.66	279.541	319.678	388.309	286.099
TKOv3_35183	MARS2	184.051	202.832	9.39953	5.06685	7.17022	16.9005	4.06692	0	84.8452	29.3656	57.8699	39.1864	91.0442	105.263
TKOv3_20676	FAM166A	218.327	290.112	284.155	96.2701	122.79	156.933	174.064	170.373	226.741	172.739	220.69	184.589	262.163	248.313
TKOv3_32743	LECT2	116.243	174.559	208.959	239.831	217.795	210.049	185.451	130	160.913	134.736	194.207	129.934	167.828	134.952
TKOv3_52226	RPUSD3	147.539	148.744	40.4903	48.9795	103.072	35.4106	61.0038	19.3789	150.673	145.101	133.395	269.149	283.005	201.079
TKOv3_58566	STAB2	199.699	197.915	359.351	292.188	294.875	180.272	299.325	406.149	288.181	302.293	228.537	237.181	283.005	237.516
TKOv3_53040	SCAND3	54.3955	47.9422	81.7036	76.0027	83.3538	61.9685	81.3384	34.7205	65.8281	88.0968	17.6552	112.403	44.9736	39.1362
TKOv3_15022	CUEDC1	185.541	220.043	219.804	177.34	118.309	186.71	185.451	198.634	201.873	177.921	224.614	178.401	197.445	171.39
TKOv3_46621	POLK	236.211	254.463	174.253	124.138	208.833	140.838	70.7644	213.168	157.988	152.01	284.445	184.589	159.053	252.361
TKOv3_04156	ASB6	222.798	199.145	74.4732	71.7804	101.279	96.5743	149.663	125.155	130.193	143.373	192.246	160.87	123.952	145.749
TKOv3_58713	STEAP2	423.242	399.519	602.293	634.201	607.676	624.514	623.052	591.056	513.459	514.762	497.289	557.89	468.384	489.878
TKOv3_68662	ZNF101	252.604	317.156	156.177	105.559	144.301	203.611	152.103	190.559	247.221	171.011	265.809	200.057	243.516	257.759
TKOv3_58440	SSTR5	217.582	217.584	169.915	206.052	155.952	133.595	104.926	195.404	188.707	131.282	154.974	216.556	185.379	183.535
TKOv3_63284	TOX2	311.47	277.819	164.13	161.295	159.537	207.635	265.976	180.062	223.816	226.288	254.039	235.118	266.551	334.682
TKOv3_35039	MAPK7	187.776	204.062	261.018	186.629	198.974	236.607	260.283	300.373	342.306	217.651	288.369	331.022	302.749	365.721
TKOv3_67304	WNT2	241.427	338.054	268.248	388.458	211.521	207.635	265.163	268.882	276.478	259.108	353.104	311.429	272.036	411.605
TKOv3_44531	PDIA6	215.347	227.418	220.528	209.43	144.301	213.268	103.3	126.77	231.13	188.285	243.25	189.745	141.502	210.526
TKOv3_01703	AHDC1	307.745	356.493	469.977	273.61	328.038	386.297	343.248	276.957	418.374	316.112	378.606	256.774	375.146	300.944
TKOv3_38702	NAPEPLD	245.898	216.355	524.205	339.479	371.955	336.401	374.156	370.621	282.33	233.197	281.503	273.274	263.26	291.497
TKOv3_04056	ART4	257.82	271.673	453.347	320.056	362.096	232.583	204.973	343.168	279.404	267.745	282.484	304.21	335.657	361.673
TKOv3_06120	BRD9	303.274	238.482	193.052	309.078	133.545	97.3791	202.533	184.907	182.856	164.102	171.648	143.34	247.903	130.904
TKOv3_05695	BFAR	74.5144	97.1137	69.4119	50.6685	28.6809	21.7292	52.8699	51.6771	45.3483	65.6408	63.755	26.8117	53.749	33.7381
TKOv3_18238	EBAG9	247.388	184.393	240.05	255.031	241.995	456.314	326.167	300.373	282.33	283.292	195.188	262.961	268.745	234.817
TKOv3_57265	SOD2	385.24	274.131	67.2428	51.513	76.1836	104.622	100.046	87.205	134.582	131.282	140.261	257.805	213.899	249.662
TKOv3_28451	IFI27L2	150.519	164.725	85.3189	146.939	141.612	126.351	154.543	116.273	81.9195	60.4586	97.1037	107.247	149.181	122.807
TKOv3_67482	XKR4	251.114	279.048	305.123	237.297	314.593	266.384	273.297	318.944	320.364	238.38	272.675	327.928	287.392	327.935
TKOv3_57900	SPIRE1	192.247	178.247	167.022	230.542	97.6943	103.013	213.92	163.913	238.444	193.468	214.805	174.276	134.921	124.156
TKOv3_48008	PRPF40A	183.305	194.227	96.8875	124.982	98.5905	96.5743	47.9896	68.6336	136.045	191.74	120.644	168.089	134.921	242.914
TKOv3_32776	LENEP	222.053	191.769	334.768	376.636	419.458	412.855	215.547	383.541	270.627	203.832	299.158	270.18	185.379	273.954
TKOv3_20004	EVI5L	181.07	183.164	135.932	167.206	205.248	184.296	247.269	90.4348	125.805	127.827	184.399	170.151	131.63	222.672
TKOv3_63960	TRIM71	224.288	184.393	478.653	273.61	391.673	342.839	398.558	349.628	197.484	295.383	230.499	251.618	259.97	190.283
TKOv3_00142	ABCA3	191.502	137.68	234.265	238.986	182.841	202.806	126.074	276.957	235.518	191.74	197.15	178.401	186.476	175.438
TKOv3_20633	FAM160A1	116.988	119.241	134.486	128.36	134.442	146.471	139.902	203.478	125.805	145.101	122.606	90.7474	159.053	71.5248
TKOv3_47484	PRAME	125.184	104.489	138.824	103.87	159.537	138.423	104.926	121.118	71.6795	117.462	194.207	133.027	141.502	128.205
TKOv3_24185	GHRHR	122.204	131.534	166.299	110.626	136.234	131.985	92.7257	92.0498	133.119	207.287	89.257	141.277	78.9781	63.4277
TKOv3_03453	ARGFX	147.539	87.2794	151.116	179.029	167.604	132.79	162.677	178.447	86.308	103.643	120.644	104.153	92.1411	103.913
TKOv3_35564	MDGA1	188.521	185.622	241.496	237.297	201.662	247.069	191.959	251.926	149.21	171.011	247.173	129.934	182.088	159.244
TKOv3_20973	FAM211A	234.72	236.023	270.417	245.742	234.825	265.579	237.508	179.255	225.279	255.654	192.246	203.15	272.036	195.681
TKOv3_70366	ZNF843	222.798	121.699	125.809	166.362	214.21	181.077	182.198	141.304	228.204	190.013	298.177	220.681	234.74	286.099
TKOv3_12015	CHAC2	312.961	244.628	240.05	265.165	343.274	354.106	287.124	304.41	320.364	285.019	220.69	253.68	295.071	207.827
TKOv3_52326	RRP9	233.975	323.303	43.3825	19.4229	60.9469	27.3627	16.2677	46.0249	73.1424	60.4586	79.4485	76.3103	100.916	90.4182
TKOv3_32724	LDLRAP1	257.82	208.979	175.699	235.608	119.205	189.93	279.804	223.665	282.33	219.378	305.043	192.838	216.093	242.914
TKOv3_57820	SPIB	315.941	322.073	172.084	194.229	194.492	229.364	151.289	137.267	216.501	160.647	197.15	230.993	232.547	255.06
TKOv3_51451	RNF135	93.8882	95.8845	34.706	51.513	85.1464	74.8451	95.9793	150.186	92.1594	115.735	133.395	100.028	89.9473	133.603
TKOv3_49758	RALBP1	285.39	282.736	308.016	231.386	233.032	291.333	245.642	226.087	343.769	266.018	267.771	312.46	341.141	353.576
TKOv3_51174	RING1	221.308	199.145	107.01	113.16	107.553	145.666	118.754	155.839	228.204	202.104	192.246	169.12	200.736	225.371
TKOv3_17487	DOK1	147.539	129.075	245.111	270.232	189.115	131.18	158.61	191.367	276.478	146.828	222.652	129.934	249	168.691
TKOv3_16321	DEFB118	280.174	346.659	333.322	234.764	264.402	397.564	347.315	310.87	260.387	324.749	359.97	305.241	341.141	260.458
TKOv3_56213	SLC6A17	192.247	185.622	135.209	67.558	175.67	77.2595	152.916	174.41	225.279	150.283	189.303	147.465	231.45	222.672
TKOv3_61351	TIMM9	298.058	315.927	229.927	274.454	330.726	235.802	278.177	280.187	289.644	245.289	308.966	276.367	259.97	267.206
TKOv3_31799	KLHL8	363.63	373.704	425.148	412.948	494.745	527.135	741.806	563.603	419.837	483.669	577.718	498.08	541.877	574.898
TKOv3_07632	C1orf227	161.696	210.208	204.621	181.562	122.79	127.961	154.543	197.826	198.947	176.194	184.399	156.746	144.793	175.438
TKOv3_42968	OSER1	111.026	161.037	206.79	105.559	190.011	312.257	165.117	180.87	112.639	81.1873	114.759	98.9972	118.467	128.205
TKOv3_49648	RAD21L1	137.852	192.998	232.096	144.405	181.048	192.344	148.036	244.659	138.971	222.833	129.472	136.121	144.793	128.205
TKOv3_24174	GHR	230.25	258.15	203.898	154.539	170.293	185.906	161.05	195.404	235.518	255.654	185.38	203.15	334.56	180.836
TKOv3_14799	CTC1	141.577	135.222	23.1373	0	3.58511	2.41436	3.25353	6.45963	35.1083	13.8191	24.5211	16.4995	6.58151	6.74762
TKOv3_51843	RPA4	337.55	323.303	431.656	288.81	483.99	454.704	353.822	455.404	488.591	437.029	357.028	414.551	474.965	326.585
TKOv3_61071	THAP7	90.9076	94.6552	70.135	76.8472	107.553	111.865	109.807	96.8945	86.308	72.5503	79.4485	27.843	81.1719	60.7286
TKOv3_14692	CSRP2BP	116.243	141.368	187.991	150.317	149.678	154.519	160.237	191.367	160.913	167.557	183.418	129.934	163.441	175.438
TKOv3_06156	BRINP2	149.774	204.062	112.794	168.051	164.915	220.511	126.074	159.876	159.45	139.918	161.84	200.057	187.573	179.487
TKOv3_63058	TNNC2	207.15	206.52	221.974	255.031	171.189	136.009	178.131	253.541	241.37	188.285	132.414	148.496	162.344	125.506
TKOv3_45288	PHYHD1	317.431	317.156	574.095	474.595	527.907	387.102	619.798	413.416	397.895	407.664	484.538	421.769	412.441	466.936
TKOv3_46782	POMT1	116.243	162.266	91.8262	65.869	77.0799	49.092	52.8699	56.5218	105.325	79.4599	63.755	106.216	100.916	45.8838
TKOv3_03560	ARHGAP4	312.215	352.806	438.886	366.502	401.532	350.887	317.22	413.416	334.992	371.389	380.568	353.709	285.199	329.284
TKOv3_61927	TMEM147	425.477	376.162	583.494	651.935	687.445	553.693	564.488	518.385	409.597	443.939	429.61	377.427	523.23	462.887
TKOv3_45181	PHF7	215.347	256.921	189.437	135.116	161.33	127.961	173.251	153.416	143.359	224.561	237.365	226.869	194.154	241.565
TKOv3_65665	UNC13C	220.563	178.247	208.959	384.236	220.484	306.624	285.498	403.727	239.907	228.015	256.001	202.119	213.899	222.672
TKOv3_47515	PRCC	274.958	249.545	146.777	114.004	98.5905	104.622	142.342	125.963	187.244	157.192	182.437	141.277	168.925	213.225
TKOv3_64966	TXNDC8	221.308	212.667	306.569	380.858	332.519	515.868	345.688	411.802	269.164	264.29	277.579	280.492	222.674	211.875
TKOv3_15443	CYP2C9	196.718	147.515	326.092	307.389	387.192	218.902	405.065	425.528	250.147	257.381	304.062	225.837	276.423	195.681
TKOv3_42051	OR2W3	286.881	237.253	215.466	408.726	408.703	430.561	405.878	423.106	304.272	281.564	318.775	344.428	402.569	330.634
TKOv3_19363	ENTHD2	248.878	217.584	81.7036	133.427	113.827	108.646	91.9123	208.323	114.102	129.554	151.05	183.557	125.049	112.011
TKOv3_68013	ZC2HC1C	124.439	102.031	154.008	159.606	213.314	127.961	145.596	264.037	98.0108	133.009	164.782	155.714	133.824	122.807
TKOv3_49462	RAB3C	169.893	149.973	235.711	309.922	237.514	319.5	173.251	221.242	311.587	103.643	235.403	172.214	297.265	229.419
TKOv3_05636	BEND2	147.539	184.393	177.145	180.718	130.857	174.639	118.754	208.323	191.633	181.376	154.974	209.338	167.828	109.312
TKOv3_54890	SKIV2L	205.66	205.291	99.0566	176.495	158.641	193.953	175.691	142.112	188.707	307.475	233.441	237.181	207.317	161.943
TKOv3_53768	SEPSECS	266.762	237.253	27.4756	5.91132	24.1995	20.1197	31.722	12.1118	232.593	241.834	154.974	265.024	222.674	170.04
TKOv3_62147	TMEM196	168.403	201.603	131.593	222.941	164.915	161.762	209.04	107.391	209.187	183.103	188.322	155.714	272.036	159.244
TKOv3_06117	BRD8	144.558	145.056	32.5368	19.4229	27.7846	16.0957	34.9755	29.8758	27.7941	48.3669	46.0998	36.0927	51.5551	40.4857
TKOv3_55068	SLC15A5	130.4	138.91	167.022	155.383	157.745	210.854	160.237	226.895	179.93	212.469	174.591	234.087	217.19	188.933
TKOv3_67859	ZBTB14	332.334	350.347	149.67	154.539	251.854	237.412	142.342	182.485	261.85	179.648	128.491	250.587	363.08	321.187
TKOv3_16032	DDAH2	223.543	186.852	313.8	192.54	161.33	208.44	292.005	200.249	229.667	259.108	227.556	250.587	185.379	238.866
TKOv3_01712	AHNAK2	159.461	151.202	151.839	195.918	245.58	219.707	138.275	171.18	133.119	169.284	145.165	113.434	143.696	143.05
TKOv3_65693	UNC5C	160.206	121.699	98.3336	197.607	172.085	123.937	167.557	95.2796	133.119	100.189	96.1229	140.246	99.8195	129.554
TKOv3_33815	LRRC4C	126.675	157.349	159.069	222.097	277.846	139.228	135.022	215.59	181.393	82.9147	156.935	168.089	193.058	201.079
TKOv3_08479	C7orf31	248.133	242.17	349.229	354.679	297.564	205.22	236.695	252.733	269.164	202.104	229.518	177.37	175.507	167.341
TKOv3_57563	SPARC	141.577	130.305	183.652	206.896	155.952	157.738	177.318	138.882	177.005	172.739	187.342	187.682	137.115	129.554
TKOv3_25667	GRAP	226.524	210.208	338.383	286.277	373.748	254.312	431.093	352.857	386.192	397.299	393.319	413.52	447.542	462.887
TKOv3_24940	GOLM1	197.463	161.037	107.01	53.2019	120.997	112.67	82.9651	115.466	133.119	103.643	140.261	134.059	100.916	156.545
TKOv3_36380	MIS18A	112.517	97.1137	68.6889	65.0246	99.4868	145.666	62.6305	68.6336	127.268	114.008	86.3144	123.746	102.013	86.3696
TKOv3_36721	MOAP1	219.072	222.501	185.099	200.141	184.633	176.248	171.624	225.28	198.947	200.377	139.28	131.996	116.273	113.36
TKOv3_20149	EXT1	176.599	216.355	110.625	124.138	74.391	89.3313	152.103	69.441	112.639	112.28	171.648	100.028	105.304	215.924
TKOv3_64493	TSTD2	109.536	95.8845	142.439	135.96	108.45	127.961	68.3242	100.932	115.565	126.099	124.567	114.466	180.991	121.457
TKOv3_59233	SUSD1	198.954	247.087	187.991	254.187	222.277	272.823	335.927	332.671	332.066	241.834	184.399	305.241	279.714	221.322
TKOv3_36892	MPDZ	237.701	215.125	357.905	254.187	304.734	399.979	196.025	359.317	234.056	229.743	195.188	311.429	193.058	256.41
TKOv3_55143	SLC17A5	245.152	270.443	425.148	297.255	330.726	189.93	250.522	274.534	279.404	205.559	372.721	282.554	326.882	388.663
TKOv3_46748	POLRMT	232.485	201.603	28.1986	49.824	17.9256	57.9446	110.62	21.8013	84.8452	119.19	51.9848	78.3728	89.9473	51.2819
TKOv3_10410	CCNB1	226.524	205.291	159.069	212.808	146.99	171.419	169.997	141.304	236.981	259.108	237.365	226.869	201.833	145.749
TKOv3_09652	CBX1	141.577	184.393	218.358	226.319	203.455	138.423	156.17	198.634	181.393	188.285	147.127	157.777	116.273	163.293
TKOv3_04129	ASB16	132.636	159.807	105.564	90.3588	63.6357	64.3829	25.2149	41.9876	117.028	91.5516	92.1995	102.091	94.3349	120.108
TKOv3_54790	SIRPD	195.973	206.52	362.244	323.434	325.349	295.357	386.357	206.708	352.546	343.75	256.982	278.43	390.503	286.099
TKOv3_52471	RTN4	245.152	199.145	297.17	372.413	508.189	315.476	305.832	345.59	279.404	233.197	366.836	204.182	278.617	388.663
TKOv3_26626	HDAC5	212.366	258.15	139.547	146.094	117.412	152.909	219.614	204.286	318.901	319.567	213.824	228.931	161.247	184.885
TKOv3_57738	SPDYE1	220.563	226.189	381.766	257.565	318.179	323.524	227.747	334.286	261.85	300.566	295.235	266.055	301.652	298.245
TKOv3_34294	LYRM4	272.723	265.526	65.0737	43.9127	60.0506	68.4068	108.993	75.9007	134.582	65.6408	86.3144	60.842	91.0442	47.2334
TKOv3_51528	RNF17	143.068	120.47	140.27	105.559	210.625	165.786	168.37	154.224	103.862	105.371	213.824	117.559	121.758	236.167
TKOv3_38390	MYOM2	129.655	151.202	192.329	233.075	195.389	243.85	146.409	229.317	254.535	184.831	195.188	238.212	250.097	165.992
TKOv3_25463	GPR52	181.815	181.935	202.452	122.449	153.263	134.399	123.634	92.0498	122.879	76.0051	129.472	106.216	102.013	103.913
TKOv3_54007	SERTAD1	201.189	250.775	110.625	156.228	75.2873	188.32	179.758	161.491	194.559	162.375	173.61	215.525	178.798	222.672
TKOv3_04872	ATPIF1	70.7887	70.0694	166.299	108.093	185.529	57.9446	88.6588	136.46	119.953	115.735	68.6592	140.246	96.5288	95.8163
TKOv3_40008	NMRK2	213.111	200.374	423.702	148.628	191.803	214.878	285.498	187.329	305.735	219.378	302.101	254.712	263.26	276.653
TKOv3_12723	CLDN5	258.565	238.482	354.29	377.48	403.325	342.839	309.899	264.845	269.164	241.834	363.894	323.803	255.582	263.157
TKOv3_41145	NXF3	102.83	129.075	147.5	157.917	224.966	243.045	164.303	211.553	165.302	171.011	135.357	141.277	98.7226	160.593
TKOv3_00226	ABCC3	292.842	266.755	175.699	192.54	154.16	197.977	248.895	256.77	348.158	266.018	307.986	224.806	247.903	306.342
TKOv3_55302	SLC22A6	371.827	312.239	281.986	241.52	264.402	293.747	217.173	307.64	498.831	329.931	310.928	369.177	445.349	433.198
TKOv3_54896	SKOR1	125.929	100.802	46.2746	47.2906	60.9469	53.9207	49.6164	48.4472	86.308	89.8242	95.142	56.7171	94.3349	53.981
TKOv3_50922	RGS6	170.638	140.139	244.388	268.543	239.306	280.066	197.652	316.522	212.113	188.285	194.207	186.651	254.485	168.691
TKOv3_33542	LRFN5	114.007	92.1966	190.16	185.784	192.7	139.228	128.515	165.528	178.467	148.555	101.027	163.964	99.8195	148.448
TKOv3_29161	IL7R	271.978	227.418	181.483	223.786	172.085	261.555	300.952	289.876	254.535	314.385	238.346	174.276	268.745	190.283
TKOv3_14063	CPLX4	399.397	378.621	537.22	553.976	510.878	509.43	411.572	660.497	443.243	478.487	501.212	485.705	489.225	427.799
TKOv3_21489	FAS	124.439	110.636	86.7649	180.718	86.9389	144.057	71.5778	119.503	77.5309	57.0038	62.7741	84.5601	51.5551	68.8258
TKOv3_19038	ELMSAN1	97.6139	105.719	121.471	114.849	87.8352	57.9446	104.113	134.845	105.325	179.648	187.342	136.121	149.181	157.894
TKOv3_39563	NFKBIB	222.053	272.902	95.4414	117.382	120.101	177.053	130.955	76.7081	191.633	129.554	185.38	136.121	238.031	215.924
TKOv3_44907	PFKP	167.657	184.393	196.667	305.7	233.032	335.596	315.593	201.863	234.056	274.655	158.897	217.588	170.022	218.623
TKOv3_37368	MRPS23	192.992	267.985	38.3212	31.2456	67.2208	23.3388	96.7926	46.8323	127.268	133.009	139.28	85.5913	98.7226	130.904
TKOv3_70670	luciferase	199.699	216.355	347.06	394.37	397.051	352.496	398.558	452.174	275.015	300.566	316.813	302.148	285.199	303.643
TKOv3_41919	OR2AT4	122.204	145.056	220.528	90.3588	157.745	110.256	226.121	205.901	231.13	148.555	122.606	136.121	127.242	172.739
TKOv3_31698	KLHL2	65.5727	82.3623	104.841	112.315	67.2208	129.571	135.022	139.69	35.1083	29.3656	63.755	35.0615	44.9736	58.0296
TKOv3_25464	GPR52	175.109	132.763	115.687	113.16	106.657	123.132	121.194	165.528	96.5479	153.738	185.38	109.309	109.692	95.8163
TKOv3_33353	LONP1	138.597	205.291	14.4608	19.4229	24.1995	7.24308	16.2677	0	20.4799	1.72739	35.3104	30.9366	37.2952	32.3886
TKOv3_23982	GDNF	140.832	178.247	190.883	108.937	282.327	202.806	208.226	130.808	216.501	262.563	230.499	161.902	225.965	180.836
TKOv3_15361	CYP11B1	343.511	379.85	510.467	447.572	371.059	539.207	476.643	303.603	329.141	367.934	453.151	444.456	383.921	425.1
TKOv3_58655	STARD8	236.211	204.062	164.13	215.341	159.537	210.854	240.762	159.876	247.221	174.466	141.242	134.059	191.961	129.554
TKOv3_26063	GTF2E1	99.1042	113.094	139.547	127.516	93.2129	100.598	91.099	126.77	137.508	141.646	188.322	204.182	244.613	245.614
TKOv3_25736	GRIA3	291.351	296.258	245.834	277.832	238.41	205.22	192.772	234.162	226.741	198.65	250.116	261.93	223.771	244.264
TKOv3_43280	PABPC1L	236.211	288.883	149.67	209.43	186.426	205.22	148.036	201.863	212.113	162.375	183.418	196.963	166.732	128.205
TKOv3_61690	TMCO3	269.742	279.048	305.846	248.276	205.248	284.894	239.135	188.137	228.204	310.93	257.962	350.615	233.643	304.993
TKOv3_02790	ANO1	274.958	261.838	342.721	349.613	337.897	222.121	419.706	297.143	378.877	314.385	330.545	295.96	309.331	358.974
TKOv3_69481	ZNF491	158.716	135.222	378.15	298.944	242.891	383.883	371.716	376.274	168.227	188.285	189.303	214.494	183.185	194.332
TKOv3_05837	BLNK	204.915	210.208	349.229	231.386	334.312	215.683	227.747	214.783	146.285	158.92	170.667	190.776	225.965	252.361
TKOv3_10577	CCSAP	211.621	210.208	254.51	338.634	363.889	327.548	257.843	264.845	222.353	257.381	308.966	283.586	241.322	225.371
TKOv3_47100	PPM1E	183.305	205.291	168.469	138.494	131.753	117.499	110.62	121.118	140.433	131.282	116.721	100.028	121.758	103.913
TKOv3_11615	CELA3A	312.215	331.908	447.562	461.083	389.881	456.314	432.72	310.062	536.865	310.93	356.047	311.429	385.018	445.343
TKOv3_06572	C11orf16	157.225	175.788	127.978	100.493	204.351	107.037	96.7926	149.379	128.731	134.736	141.242	222.744	196.348	153.846
TKOv3_10271	CCDC94	163.932	186.852	39.0442	24.4898	26.8883	24.9484	43.9227	23.4162	57.0511	31.093	44.1381	64.9669	64.7182	49.9324
TKOv3_45947	PLCB4	256.33	244.628	278.371	333.568	199.87	243.045	326.167	270.497	283.792	329.931	192.246	237.181	196.348	218.623
TKOv3_54854	SIX6	303.274	299.946	440.332	334.412	414.08	342.034	532.766	365.777	305.735	499.215	448.247	354.74	348.82	385.964
TKOv3_17474	DOCK8	240.682	271.673	391.165	350.457	325.349	256.727	283.057	368.199	212.113	257.381	299.158	293.898	197.445	294.196
TKOv3_44503	PDHA2	217.582	242.17	287.047	295.566	250.061	327.548	246.455	336.708	355.472	285.019	290.33	395.989	367.467	402.158
TKOv3_12455	CIAO1	168.403	212.667	44.1055	87.8254	80.665	33.801	21.9614	29.8758	49.7368	31.093	30.4062	34.0303	14.2599	18.8933
TKOv3_59202	SUPT5H	197.463	232.335	70.135	52.3574	73.4948	51.5063	47.1762	59.7516	73.1424	34.5478	47.0806	23.7181	39.489	45.8838
TKOv3_23414	GABRP	69.2984	71.2987	99.0566	56.5798	129.064	100.598	116.314	129.193	42.4226	81.1873	61.7933	55.6859	44.9736	47.2334
TKOv3_24007	GDPGP1	213.856	190.54	232.096	224.63	196.285	195.563	255.402	193.789	190.17	141.646	150.069	181.495	254.485	205.128
TKOv3_05288	BAMBI	86.4367	129.075	122.194	78.5362	73.4948	86.1121	147.222	66.2112	35.1083	55.2764	66.6975	74.2479	95.4319	145.749
TKOv3_06016	BPGM	246.643	217.584	318.138	298.1	327.141	196.368	330.234	334.286	236.981	238.38	206.958	202.119	288.489	214.574
TKOv3_26746	HECW1	173.619	131.534	260.295	157.917	243.787	204.416	276.55	222.05	190.17	195.195	215.786	179.432	182.088	230.769
TKOv3_33178	LIPJ	183.305	161.037	140.993	242.364	210.625	105.427	168.37	236.584	141.896	196.922	201.073	152.621	190.864	144.399
TKOv3_49095	PWWP2A	150.519	174.559	117.856	110.626	99.4868	80.4786	82.9651	81.5529	182.856	108.825	234.422	80.4352	103.11	172.739
TKOv3_08443	C6orf58	286.135	349.118	356.459	378.325	492.953	436.194	458.748	381.118	403.746	411.119	348.2	414.551	355.401	336.032
TKOv3_07488	C1orf111	164.677	180.705	175.699	251.654	117.412	162.567	283.871	104.969	80.4566	120.917	133.395	136.121	116.273	109.312
TKOv3_39422	NEU4	173.619	153.661	180.76	245.742	256.335	247.874	252.962	219.627	179.93	215.924	187.342	196.963	110.789	201.079
TKOv3_51105	RIC8A	263.036	232.335	90.3801	87.8254	89.6278	110.256	132.582	44.41	190.17	188.285	165.763	170.151	155.762	178.137
TKOv3_09727	CCDC102A	163.187	142.597	113.517	184.096	114.724	127.156	130.141	100.124	160.913	172.739	201.073	230.993	139.309	184.885
TKOv3_01332	ADK	277.194	256.921	326.815	434.06	360.304	357.325	307.459	376.274	374.489	350.66	246.192	273.274	262.163	272.604
TKOv3_42403	OR52N5	274.213	242.17	305.123	349.613	398.844	225.34	316.406	408.572	389.117	352.387	319.756	275.336	291.78	338.731
TKOv3_45315	PI4K2A	224.288	179.476	135.932	238.986	122.79	82.0882	174.064	144.534	200.41	155.465	117.701	194.901	198.542	102.564
TKOv3_00183	ABCB4	257.075	255.692	227.758	375.791	348.652	160.957	231.814	238.199	289.644	259.108	293.273	310.397	155.762	222.672
TKOv3_38344	MYO5C	304.019	308.551	360.074	445.883	314.593	469.995	340.808	415.839	384.729	423.21	422.745	410.426	376.243	353.576
TKOv3_57550	SPAM1	216.837	252.004	232.096	193.385	325.349	197.173	366.023	391.615	223.816	210.741	199.112	209.338	146.987	215.924
TKOv3_50305	RBM6	148.284	190.54	146.777	80.2251	79.7687	71.626	104.926	77.5156	24.8684	77.7325	103.97	60.842	36.1983	67.4762
TKOv3_08949	CACNA1G	251.114	210.208	336.937	331.034	260.817	266.384	257.029	297.143	155.062	266.018	183.418	316.585	273.133	256.41
TKOv3_56990	SNIP1	153.5	106.948	200.282	103.87	124.583	237.412	168.37	184.907	137.508	122.645	118.682	117.559	136.018	132.253
TKOv3_60058	TBC1D19	105.065	115.553	159.792	153.694	216.899	172.224	161.05	165.528	55.5882	77.7325	87.2953	127.871	107.498	72.8743
TKOv3_06497	C10orf32	70.7887	62.6937	55.6742	88.6699	50.1915	34.6058	108.18	88.8199	64.3653	50.0943	65.7167	47.4362	80.075	95.8163
TKOv3_54631	SHROOM4	128.91	95.8845	102.672	129.205	122.79	62.7733	112.247	249.503	111.176	150.283	98.0846	134.059	42.7798	86.3696
TKOv3_31133	KIAA1211L	204.915	185.622	232.819	216.186	218.692	234.193	239.135	205.901	207.724	209.014	299.158	277.398	162.344	248.313
TKOv3_08375	C6orf136	181.07	188.081	232.096	339.479	226.758	243.045	75.6447	134.845	236.981	171.011	204.016	180.464	232.547	217.274
TKOv3_69511	ZNF507	169.148	152.432	130.87	205.207	112.035	186.71	182.198	146.957	209.187	101.916	201.073	118.59	218.287	214.574
TKOv3_02206	ALPK1	327.863	355.264	556.742	466.15	509.086	415.27	478.27	489.317	384.729	423.21	315.832	412.488	382.824	376.517
TKOv3_11581	CECR1	225.779	233.565	274.033	205.207	190.907	180.272	278.177	234.969	222.353	238.38	224.614	261.93	105.304	184.885
TKOv3_34699	MAK	234.72	218.813	220.528	228.008	193.596	150.495	215.547	167.95	324.752	231.47	271.694	260.899	275.326	221.322
TKOv3_66290	VCL	116.988	114.324	192.329	122.449	170.293	173.029	116.314	125.963	209.187	179.648	233.441	154.683	191.961	244.264
TKOv3_37356	MRPS2	184.051	189.31	151.839	192.54	245.58	115.084	189.518	208.323	206.261	231.47	182.437	266.055	210.608	201.079
TKOv3_60123	TBC1D5	198.208	237.253	260.295	299.789	267.987	256.727	231.814	348.82	174.079	207.287	273.656	255.743	190.864	271.255
TKOv3_09225	CAMSAP1	318.177	357.723	195.944	135.116	217.795	172.224	144.782	162.298	210.65	210.741	234.422	220.681	264.357	230.769
TKOv3_34135	LUC7L	394.181	393.372	178.591	128.36	186.426	181.882	158.61	128.385	270.627	248.744	255.02	212.431	257.776	192.982
TKOv3_02191	ALOX5	131.145	158.578	23.8604	70.0914	143.404	121.523	123.634	222.05	71.6795	114.008	111.816	87.6538	108.595	80.9715
TKOv3_44126	PCED1A	218.327	205.291	367.305	283.744	351.341	269.603	308.272	290.683	232.593	297.111	219.709	254.712	251.194	331.983
TKOv3_21272	FAM71F2	246.643	280.278	471.423	301.478	407.806	322.719	332.674	226.087	168.227	305.748	285.426	298.023	201.833	273.954
TKOv3_09723	CCDC101	459.754	492.944	499.621	545.531	380.918	353.301	457.122	414.224	520.774	583.857	522.791	602.233	542.974	531.713
TKOv3_45022	PGM2L1	410.574	387.226	377.427	328.501	361.2	416.074	283.871	314.1	387.655	494.033	340.353	355.771	310.428	376.517
TKOv3_34593	MAGEB10	157.225	119.241	169.915	154.539	237.514	133.595	185.451	279.379	191.633	155.465	181.456	118.59	97.6257	132.253
TKOv3_12556	CKAP2L	140.087	131.534	85.3189	89.5143	94.1091	186.71	113.874	122.733	106.788	88.0968	94.1612	85.5913	71.2997	40.4857
TKOv3_59365	SYF2	266.016	286.424	268.971	224.63	162.226	193.953	163.49	296.336	188.707	229.743	214.805	210.369	146.987	288.798
TKOv3_22958	FRRS1	225.779	191.769	211.128	238.142	201.662	225.34	229.374	196.211	138.971	190.013	208.92	162.933	133.824	226.72
TKOv3_25646	GRAMD1B	316.686	323.303	357.905	318.367	265.298	293.747	287.124	343.975	260.387	221.106	253.058	229.962	257.776	271.255
TKOv3_00523	ACADSB	260.8	222.501	353.567	293.033	245.58	202.806	153.729	243.044	179.93	200.377	177.533	260.899	280.811	191.633
TKOv3_09768	CCDC112	93.8882	73.7573	47.7207	70.0914	50.1915	86.9169	60.1904	62.9814	90.6965	86.3694	91.2187	63.9357	68.0089	75.5734
TKOv3_19297	ENO2	143.068	127.846	73.0272	57.4243	72.5985	67.602	76.4581	81.5529	100.936	107.098	82.391	137.152	108.595	66.1267
TKOv3_23344	GABBR2	190.012	172.1	308.016	302.322	342.378	277.651	255.402	295.528	253.073	215.924	188.322	197.994	236.934	164.642
TKOv3_67771	YWHAH	108.791	132.763	131.593	152.005	106.657	149.69	134.208	107.391	144.822	169.284	66.6975	168.089	99.8195	174.089
TKOv3_33428	LPCAT1	205.66	204.062	251.618	249.12	248.269	328.353	162.677	239.006	248.684	266.018	240.307	253.68	378.437	280.701
TKOv3_39620	NGEF	400.888	266.755	658.69	471.217	534.181	564.155	591.33	474.783	349.621	335.113	301.12	355.771	357.595	354.925
TKOv3_60284	TBXAS1	204.17	211.438	148.223	214.497	149.678	223.731	160.237	101.739	188.707	153.738	129.472	161.902	154.665	155.195
TKOv3_42663	OR6K3	213.111	201.603	201.005	316.678	229.447	323.524	204.159	169.565	219.427	214.196	250.116	253.68	246.807	221.322
TKOv3_46186	PLIN5	213.111	200.374	65.7967	87.8254	84.2501	141.642	120.381	111.429	225.279	131.282	165.763	123.746	180.991	182.186
TKOv3_14024	CPE	221.308	229.877	323.922	284.588	197.181	289.723	264.35	260	225.279	304.02	274.637	328.959	256.679	340.08
TKOv3_57258	SOCS7	203.424	192.998	266.802	264.321	310.112	239.826	326.167	359.317	210.65	323.022	267.771	375.364	340.045	272.604
TKOv3_01362	ADORA1	190.757	142.597	178.591	83.603	230.343	181.882	163.49	176.832	111.176	108.825	186.361	152.621	142.599	110.661
TKOv3_05294	BANF1	175.109	213.896	77.3654	77.6917	81.5613	79.6738	122.008	104.969	70.2167	133.009	84.3527	113.434	89.9473	90.4182
TKOv3_35176	MARK4	354.689	403.206	252.341	290.499	224.966	457.119	260.283	275.342	460.797	461.213	414.898	404.239	365.274	479.081
TKOv3_33766	LRRC3C	41.7281	33.1908	2.89216	35.4679	24.1995	80.4786	34.9755	56.5218	21.9427	13.8191	29.4254	11.3434	16.4538	56.68
TKOv3_25882	GRPR	432.184	400.748	579.879	372.413	650.697	713.041	523.006	572.485	507.608	461.213	490.423	460.956	442.058	427.799
TKOv3_27371	HMHA1	149.029	119.241	75.9193	155.383	159.537	103.013	149.663	125.963	95.0851	110.553	115.74	119.622	150.278	198.38
TKOv3_60343	TCEANC2	318.922	341.742	295.001	276.143	339.689	343.644	224.494	289.876	283.792	290.201	286.407	284.617	314.815	329.284
TKOv3_29181	ILF2	395.672	539.657	424.425	271.921	292.186	281.675	309.086	364.162	371.563	272.927	347.219	342.365	297.265	222.672
TKOv3_14353	CRIPAK	293.587	167.183	326.092	422.237	386.296	368.592	505.925	484.472	390.58	288.474	344.277	263.993	284.102	230.769
TKOv3_66363	VGLL3	112.517	141.368	62.9046	32.9345	37.6437	70.8212	55.3101	62.174	74.6052	95.0064	69.6401	110.341	92.1411	76.9229
TKOv3_53461	SEC11C	235.466	208.979	249.449	255.876	224.966	333.181	257.843	335.093	361.323	373.116	294.254	383.614	356.498	307.692
TKOv3_57017	SNRNP40	309.235	293.8	78.8115	106.404	163.123	59.5542	260.283	58.9441	264.775	190.013	186.361	146.433	193.058	182.186
TKOv3_03682	ARHGEF40	267.507	279.048	319.584	443.349	252.75	342.034	321.287	331.864	258.924	271.2	246.192	225.837	280.811	363.022
TKOv3_32898	LGI4	180.325	228.648	232.096	309.922	295.772	291.333	278.991	250.311	239.907	229.743	259.924	239.243	309.331	318.488
TKOv3_22153	FGF20	170.638	157.349	240.05	206.896	262.609	258.336	289.565	216.398	191.633	152.01	170.667	114.466	164.538	136.302
TKOv3_06181	BRMS1L	190.757	239.711	158.346	172.273	113.827	183.491	175.691	155.839	206.261	291.929	284.445	252.649	206.221	238.866
TKOv3_65838	URI1	498.502	596.205	631.215	701.759	499.227	661.534	548.221	563.603	747.515	680.591	624.799	784.759	764.552	661.267
TKOv3_21302	FAM81A	365.121	361.411	341.998	304.011	405.117	630.952	455.495	443.292	339.381	381.753	352.124	402.176	296.168	388.663
TKOv3_59464	SYNPR	100.594	149.973	161.238	231.386	179.256	142.447	225.307	162.298	138.971	115.735	134.376	159.839	108.595	139.001
TKOv3_58702	STC1	176.599	173.33	256.68	219.563	190.907	183.491	174.877	222.05	215.039	224.561	201.073	224.806	151.375	172.739
TKOv3_11339	CDK5R1	231.74	229.877	179.314	161.295	138.923	168.2	176.504	221.242	175.542	224.561	303.081	406.301	304.943	322.536
TKOv3_61137	THNSL1	139.342	153.661	114.24	145.25	120.101	95.7696	98.4194	110.621	90.6965	101.916	75.5251	125.809	89.9473	83.6705
TKOv3_33321	LMTK3	289.861	304.863	254.51	276.988	301.149	202.806	319.66	264.037	280.867	234.925	181.456	286.679	247.903	314.439
TKOv3_58930	STRN4	243.662	309.781	188.714	209.43	184.633	155.324	185.451	132.422	193.096	210.741	193.227	286.679	354.304	282.051
TKOv3_55610	SLC29A2	239.191	236.023	126.532	109.782	127.271	82.893	95.1659	121.118	209.187	212.469	191.265	197.994	190.864	184.885
TKOv3_14534	CS	125.184	100.802	177.868	142.716	110.242	156.129	226.934	137.267	165.302	210.741	204.016	122.715	128.339	159.244
TKOv3_45782	PKP4	413.555	427.792	548.065	423.926	591.543	472.409	618.172	566.833	601.23	380.026	480.614	460.956	508.97	408.906
TKOv3_25566	GPRC6A	237.701	247.087	239.327	189.162	151.471	186.71	240.762	264.845	207.724	236.652	210.882	274.305	161.247	234.817
TKOv3_58733	STIM1	149.774	136.451	239.327	125.827	117.412	95.7696	181.385	79.1305	157.988	112.28	155.954	134.059	133.824	124.156
TKOv3_06763	C12orf5	225.779	222.501	201.005	206.896	124.583	200.392	264.35	219.627	217.964	266.018	191.265	183.557	134.921	241.565
TKOv3_25163	GPN1	186.286	242.17	0	21.1119	16.133	4.02393	4.06692	12.9193	42.4226	5.18217	6.86592	4.12488	19.7445	13.4952
TKOv3_06588	C11orf31	280.174	242.17	214.743	273.61	251.854	196.368	210.666	325.404	301.347	271.2	238.346	305.241	360.886	219.973
TKOv3_32649	LCORL	251.859	242.17	292.832	281.21	302.046	269.603	385.544	363.354	245.758	271.2	275.618	246.462	173.313	286.099
TKOv3_32154	KRT4	229.504	239.711	221.974	279.521	164.915	123.132	214.733	176.832	146.285	91.5516	122.606	154.683	141.502	144.399
TKOv3_41983	OR2J3	483.599	306.093	610.247	510.907	577.203	612.442	559.608	705.715	475.425	514.762	372.721	450.643	465.093	433.198
TKOv3_12423	CHST9	215.347	210.208	212.574	188.318	167.604	243.85	348.128	274.534	226.741	184.831	269.733	212.431	254.485	257.759
TKOv3_60043	TBC1D14	294.332	255.692	331.876	286.277	295.772	354.911	310.713	268.882	288.181	224.561	226.575	300.085	329.075	292.847
TKOv3_60267	TBX3	219.818	218.813	261.741	320.056	288.601	341.229	340.808	254.348	187.244	269.473	271.694	222.744	189.767	244.264
TKOv3_27813	HRH1	359.905	318.386	514.805	410.415	278.742	502.991	634.439	478.82	433.003	466.395	443.342	474.362	406.957	344.129
TKOv3_29755	ISG20L2	239.191	279.048	0.723041	5.91132	0.896278	13.6814	4.8803	3.22982	0	6.90956	1.96169	5.1561	8.77534	9.44667
TKOv3_03932	ARNTL	354.689	322.073	240.05	243.209	289.498	395.15	296.072	309.255	289.644	350.66	284.445	373.302	347.723	334.682
TKOv3_21797	FBXO46	215.347	252.004	155.454	114.849	94.1091	115.889	171.624	156.646	244.296	190.013	164.782	268.117	225.965	184.885
TKOv3_53449	SDS	299.548	263.068	240.05	237.297	276.95	234.193	156.983	334.286	200.41	269.473	318.775	277.398	182.088	287.449
TKOv3_03296	APPL1	312.215	261.838	294.278	331.879	424.836	474.824	295.258	530.497	253.073	426.665	329.564	340.303	391.6	310.391
TKOv3_45031	PGP	166.912	157.349	244.388	151.161	172.085	72.4308	94.3525	83.1678	125.805	124.372	120.644	126.84	85.5596	98.5153
TKOv3_69000	ZNF266	263.036	304.863	280.54	276.988	233.032	256.727	350.568	247.081	263.313	361.024	290.33	280.492	258.873	484.479
TKOv3_47183	PPP1R13L	167.657	138.91	214.02	217.03	208.833	277.651	143.156	186.522	90.6965	174.466	109.855	229.962	102.013	118.758
TKOv3_60092	TBC1D28	235.466	206.52	104.118	170.584	241.099	173.834	292.818	293.106	124.342	139.918	118.682	103.122	99.8195	112.011
TKOv3_37865	MTSS1	273.468	271.673	375.981	555.664	351.341	345.253	318.846	364.162	364.249	343.75	290.33	368.146	376.243	317.138
TKOv3_06932	C15orf27	263.781	324.532	308.739	358.057	283.224	263.165	202.533	299.565	244.296	295.383	260.905	304.21	208.414	288.798
TKOv3_09411	CARKD	195.228	266.755	226.312	244.898	198.077	300.185	223.68	202.671	273.552	250.471	284.445	266.055	239.128	210.526
TKOv3_60154	TBCC	200.444	208.979	79.5345	48.9795	61.8432	103.013	64.2573	41.9876	55.5882	22.4561	35.3104	40.2176	29.6168	14.8448
TKOv3_41690	OR11G2	154.99	132.763	219.081	217.875	288.601	248.679	160.237	347.205	217.964	222.833	218.729	204.182	262.163	151.147
TKOv3_46989	PPEF1	211.621	247.087	339.106	287.121	300.253	294.552	382.29	339.938	222.353	174.466	139.28	183.557	250.097	122.807
TKOv3_15907	DCK	262.291	290.112	393.334	439.127	293.083	504.601	465.255	476.398	222.353	231.47	296.215	226.869	263.26	232.118
TKOv3_10895	CD7	295.077	351.576	291.386	352.146	257.232	297.771	289.565	276.957	318.901	243.562	161.84	224.806	273.133	171.39
TKOv3_51619	RNF219	112.517	125.387	206.79	119.915	286.809	139.228	183.825	188.137	127.268	155.465	140.261	194.901	148.084	164.642
TKOv3_42885	ORC6	175.854	149.973	54.2281	50.6685	64.532	33.801	91.099	67.0187	35.1083	57.0038	66.6975	23.7181	64.7182	87.7191
TKOv3_03225	APOC3	257.82	237.253	221.251	307.389	148.782	216.487	196.025	223.665	174.079	162.375	153.012	254.712	235.837	237.516
TKOv3_59598	TAAR5	239.936	292.571	407.072	356.368	279.639	310.647	279.804	413.416	355.472	304.02	350.162	362.99	283.005	364.372
TKOv3_40872	NUBP1	382.259	330.678	463.469	436.594	345.067	410.441	550.661	490.125	327.678	324.749	387.434	312.46	417.926	379.217
TKOv3_34103	LTBP2	159.461	200.374	92.5493	168.051	149.678	134.399	126.888	112.236	106.788	152.01	117.701	138.184	167.828	113.36
TKOv3_24806	GNG2	279.429	248.316	229.927	187.473	233.928	259.946	296.072	268.075	198.947	238.38	176.552	212.431	253.388	180.836
TKOv3_01159	ADAMTSL5	134.871	138.91	135.932	93.7367	51.0878	98.9887	78.8982	135.652	118.491	72.5503	81.4102	88.685	94.3349	113.36
TKOv3_33019	LILRA4	118.478	111.865	148.223	72.6248	53.7767	138.423	113.874	79.1305	46.8111	101.916	82.391	89.7162	94.3349	63.4277
TKOv3_42023	OR2T11	251.114	293.8	239.327	443.349	439.176	331.572	463.629	345.59	362.786	373.116	362.913	376.396	338.948	333.333
TKOv3_70344	ZNF836	286.135	249.545	362.244	271.076	447.242	288.918	281.431	405.342	352.546	328.204	317.794	376.396	250.097	287.449
TKOv3_63455	TPRG1L	134.871	151.202	106.287	107.248	83.3538	158.543	70.7644	102.547	143.359	162.375	141.242	152.621	97.6257	195.681
TKOv3_10955	CD93	228.014	265.526	337.66	279.521	299.357	263.97	305.019	366.584	270.627	326.476	338.392	299.054	257.776	417.003
TKOv3_56863	SMTNL1	280.174	299.946	276.202	285.433	307.423	281.675	328.607	293.913	402.283	345.478	414.898	378.458	489.225	450.741
TKOv3_09584	CAV2	333.079	323.303	237.881	314.989	378.229	304.209	362.769	268.882	342.306	283.292	300.139	279.461	204.027	288.798
TKOv3_31431	KIF4B	237.701	245.858	120.025	231.386	194.492	234.998	183.011	197.019	260.387	160.647	178.514	151.589	214.996	215.924
TKOv3_62913	TNFRSF13C	350.963	291.341	372.366	255.031	230.343	208.44	291.191	213.975	283.792	250.471	353.104	235.118	256.679	345.478
TKOv3_00561	ACBD5	292.097	248.316	247.28	227.164	193.596	281.675	247.269	328.634	286.718	317.84	307.005	319.678	276.423	256.41
TKOv3_24480	GLIS1	195.973	151.202	104.841	99.648	176.567	144.057	209.853	147.764	95.0851	82.9147	105.931	107.247	71.2997	151.147
TKOv3_54724	SIK2	301.783	264.297	339.106	395.214	374.644	274.432	270.043	385.156	244.296	355.842	218.729	287.711	303.846	294.196
TKOv3_36847	MORN4	241.427	242.17	46.2746	48.9795	129.064	78.869	58.5636	64.5963	160.913	153.738	79.4485	181.495	159.053	157.894
TKOv3_54824	SIT1	246.643	190.54	192.329	167.206	255.439	317.086	259.469	253.541	182.856	212.469	319.756	250.587	228.159	271.255
TKOv3_69386	ZNF445	198.208	154.89	45.5516	122.449	129.96	137.618	161.05	171.988	68.7538	207.287	125.548	180.464	177.701	107.962
TKOv3_49617	RAC2	274.213	216.355	237.881	167.206	283.224	174.639	246.455	197.019	267.701	148.555	179.495	177.37	242.419	226.72
TKOv3_22408	FKBP8	386.73	485.569	309.462	273.61	231.24	321.11	332.674	197.826	294.032	257.381	372.721	334.116	356.498	452.091
TKOv3_22723	FOXD3	436.655	322.073	296.447	450.105	372.851	482.872	387.984	436.025	506.145	592.494	560.063	467.143	462.899	516.868
TKOv3_59406	SYNE3	350.218	270.443	506.129	461.928	413.184	452.29	454.681	427.951	352.546	528.581	442.361	587.796	376.243	435.897
TKOv3_32228	KRT85	367.356	295.029	259.572	287.966	285.016	260.751	327.794	247.081	239.907	276.382	300.139	271.211	221.577	357.624
TKOv3_14690	CSRP2BP	182.56	184.393	133.04	85.292	147.886	90.9408	131.768	79.9379	207.724	215.924	192.246	220.681	190.864	213.225
TKOv3_36839	MORN2	312.961	304.863	364.413	347.079	304.734	448.266	355.449	353.665	487.128	369.661	373.702	364.021	388.309	309.041
TKOv3_00855	ACTL7B	144.558	140.139	244.388	188.318	231.24	206.83	244.828	303.603	140.433	139.918	173.61	248.524	258.873	171.39
TKOv3_66610	VRK3	193.738	226.189	184.375	325.123	241.995	309.843	202.533	213.975	269.164	253.926	238.346	218.619	240.225	221.322
TKOv3_03966	ARPP19	298.058	266.755	340.552	244.053	209.729	352.496	233.441	276.149	229.667	364.479	281.503	265.024	188.67	213.225
TKOv3_35429	MCCD1	247.388	287.653	186.545	129.205	175.67	145.666	108.993	184.907	342.306	297.111	297.196	291.835	240.225	198.38
TKOv3_70035	ZNF691	323.393	312.239	254.51	310.767	315.49	420.098	393.678	406.149	282.33	217.651	279.541	188.713	198.542	225.371
TKOv3_20254	F8	239.191	199.145	234.265	191.696	177.463	213.268	216.36	234.969	238.444	279.837	189.303	220.681	210.608	148.448
TKOv3_27212	HIST2H2AB	255.584	334.366	126.532	184.94	152.367	144.862	256.216	242.236	215.039	203.832	215.786	229.962	292.877	249.662
TKOv3_58680	STAT5A	152.755	183.164	144.608	205.207	120.101	120.718	167.557	356.087	174.079	169.284	222.652	230.993	229.256	222.672
TKOv3_51608	RNF216	64.8275	65.1523	96.8875	18.5784	60.0506	41.8489	12.2008	63.7889	40.9597	72.5503	55.9082	76.3103	88.8503	39.1362
TKOv3_14650	CSNK2A3	146.048	148.744	152.562	134.272	66.3245	134.399	131.768	244.659	203.336	158.92	113.778	173.245	172.216	153.846
TKOv3_51530	RNF17	169.148	205.291	169.192	310.767	160.434	210.854	187.892	177.64	261.85	205.559	250.116	202.119	160.15	259.109
TKOv3_01599	AGO2	294.332	429.021	211.128	276.988	398.844	255.922	218.8	287.454	396.432	386.935	357.028	382.583	249	322.536
TKOv3_24963	GOPC	189.267	190.54	201.728	199.296	232.136	245.46	229.374	189.752	157.988	240.107	184.399	233.056	125.049	148.448
TKOv3_38171	MYH2	315.196	342.971	524.205	417.171	467.857	457.923	661.281	465.093	408.134	480.214	476.691	438.269	549.556	426.45
TKOv3_63813	TRIM31	210.131	243.399	185.099	142.716	177.463	238.217	213.107	215.59	160.913	191.74	236.384	136.121	201.833	159.244
TKOv3_22868	FPR1	183.305	146.285	132.317	184.94	148.782	131.18	178.131	170.373	83.3823	124.372	206.958	128.903	138.212	133.603
TKOv3_10539	CCR4	242.172	263.068	343.445	343.701	275.157	362.154	229.374	351.242	203.336	260.836	297.196	309.366	247.903	321.187
TKOv3_07158	C17orf59	233.975	234.794	313.077	316.678	233.032	265.579	238.321	218.82	310.124	304.02	273.656	335.147	385.018	261.808
TKOv3_39688	NHSL2	373.317	383.538	297.893	271.921	304.734	202.001	218.8	333.478	238.444	274.655	232.46	214.494	297.265	267.206
TKOv3_09924	CCDC157	210.876	243.399	273.31	158.761	252.75	180.272	300.952	341.553	248.684	165.829	179.495	203.15	245.71	218.623
TKOv3_33166	LIPG	280.919	287.653	283.432	349.613	263.506	219.707	187.078	209.938	277.941	331.659	303.081	283.586	276.423	311.74
TKOv3_23137	FUT11	167.657	142.597	184.375	130.049	117.412	255.922	127.701	119.503	114.102	207.287	157.916	172.214	165.635	199.73
TKOv3_16160	DDX39A	438.89	399.519	251.618	314.145	311.008	334.791	368.463	383.541	519.311	229.743	394.3	379.489	399.278	607.286
TKOv3_52579	RWDD2B	154.99	141.368	145.331	234.764	188.218	120.718	187.892	177.64	166.765	209.014	148.108	217.588	175.507	194.332
TKOv3_29127	IL4	359.905	377.391	406.349	530.33	582.58	446.656	492.097	448.137	399.357	559.674	482.576	608.42	333.463	476.382
TKOv3_32430	LAMTOR3	221.308	247.087	566.141	301.478	348.652	614.052	392.864	490.125	359.86	357.569	324.66	314.522	419.023	345.478
TKOv3_43884	PCDH12	187.031	135.222	193.775	224.63	199.87	185.101	250.522	170.373	149.21	126.099	120.644	113.434	171.119	113.36
TKOv3_70292	ZNF808	174.364	175.788	199.559	234.764	212.418	152.909	262.723	293.913	169.69	184.831	192.246	175.308	183.185	180.836
TKOv3_61043	THAP10	177.344	175.788	272.586	150.317	155.952	124.742	126.888	148.572	178.467	150.283	179.495	90.7474	121.758	175.438
TKOv3_24841	GNL3	70.7887	90.9673	70.858	92.0478	42.125	100.598	89.4722	16.9565	70.2167	24.1834	32.3679	50.5298	48.2644	17.5438
TKOv3_66298	VCPIP1	77.495	82.3623	213.297	179.029	113.827	36.2154	76.4581	103.354	125.805	153.738	109.855	83.5289	133.824	63.4277
TKOv3_46296	PLXNB2	191.502	206.52	228.481	210.274	279.639	285.699	265.976	306.025	197.484	127.827	156.935	128.903	142.599	124.156
TKOv3_16420	DENND4A	161.696	159.807	166.299	185.784	148.782	200.392	272.484	194.596	193.096	119.19	212.844	105.185	227.062	182.186
TKOv3_09784	CCDC116	260.055	261.838	260.295	350.457	312.801	381.469	376.597	262.423	340.843	376.571	349.181	440.331	390.503	327.935
TKOv3_06380	BTNL9	246.643	196.686	237.881	295.566	261.713	230.974	161.05	213.168	159.45	241.834	164.782	201.088	140.405	202.429
TKOv3_61275	TIGD4	152.755	127.846	201.728	193.385	142.508	128.766	169.184	185.714	93.6222	119.19	149.089	98.9972	175.507	202.429
TKOv3_48459	PSMC3IP	184.796	202.832	60.7355	32.9345	98.5905	83.6978	100.86	115.466	134.582	136.464	140.261	130.965	156.859	171.39
TKOv3_52891	SARDH	396.417	373.704	260.295	199.296	193.596	416.074	173.251	255.963	315.975	226.288	271.694	252.649	274.229	290.148
TKOv3_49079	PVRL3	175.854	183.164	197.39	235.608	275.157	208.44	278.177	337.516	160.913	165.829	200.093	199.026	165.635	256.41
TKOv3_05970	BNIP3	109.536	136.451	73.7502	235.608	48.399	24.9484	39.8558	86.3976	99.4736	82.9147	77.4868	65.9981	131.63	99.8648
TKOv3_12650	CLCN7	216.092	204.062	201.005	81.0696	78.8724	50.7015	151.289	109.006	92.1594	117.462	80.4294	108.278	61.4274	67.4762
TKOv3_47409	PPP5D1	260.055	240.94	143.885	253.342	162.226	248.679	222.054	225.28	198.947	115.735	153.012	155.714	175.507	191.633
TKOv3_28468	IFI6	222.053	206.52	251.618	208.585	190.011	187.515	179.758	139.69	253.073	207.287	302.101	243.368	154.665	315.789
TKOv3_35403	MC5R	122.949	102.031	96.1645	195.918	217.795	193.149	152.916	197.019	168.227	129.554	91.2187	102.091	130.533	109.312
TKOv3_02933	AP003774.4	267.507	265.526	147.5	67.558	164.019	178.663	166.744	182.485	166.765	122.645	195.188	136.121	121.758	174.089
TKOv3_57144	SNX19	252.604	301.176	261.018	346.235	380.918	226.145	267.603	339.131	276.478	240.107	320.737	252.649	233.643	375.168
TKOv3_05652	BEND6	122.204	183.164	211.128	94.5812	148.782	148.081	141.529	104.162	160.913	179.648	164.782	162.933	141.502	149.797
TKOv3_19086	ELP4	196.718	216.355	111.348	54.0464	50.1915	48.2872	46.3629	69.441	87.7708	77.7325	64.7358	83.5289	82.2688	63.4277
TKOv3_00785	ACSM2B	429.948	363.869	567.587	560.731	633.668	502.991	569.369	452.174	523.699	454.303	445.304	349.584	376.243	364.372
TKOv3_49431	RAB35	355.434	366.328	324.645	241.52	532.389	335.596	290.378	232.547	362.786	411.119	368.798	356.802	449.736	329.284
TKOv3_38048	MYADM	298.058	350.347	226.312	359.746	468.753	396.76	437.6	320.559	321.826	343.75	335.449	437.238	341.141	363.022
TKOv3_62647	TMEM89	254.094	232.335	365.136	511.752	460.687	429.756	564.488	478.013	355.472	400.754	342.315	425.894	329.075	296.895
TKOv3_46565	POLB	292.097	277.819	276.925	237.297	270.676	185.101	235.881	292.298	339.381	367.934	309.947	251.618	315.912	275.303
TKOv3_18003	DUSP22	137.107	194.227	173.53	183.251	152.367	256.727	140.715	133.23	156.525	160.647	156.935	170.151	93.238	116.059
TKOv3_48074	PRR16	168.403	149.973	135.209	206.052	95.9017	190.734	117.127	117.888	146.285	82.9147	100.046	117.559	103.11	93.1172
TKOv3_30274	KAT7	218.327	178.247	270.417	255.031	197.181	239.826	225.307	128.385	215.039	131.282	212.844	197.994	168.925	205.128
TKOv3_35206	MASP1	167.657	132.763	122.917	109.782	151.471	108.646	99.2328	81.5529	86.308	167.557	113.778	177.37	145.89	128.205
TKOv3_11080	CDC42EP5	387.475	323.303	407.795	373.258	274.261	263.97	278.991	322.174	318.901	366.206	338.392	441.362	327.978	376.517
TKOv3_70085	ZNF707	334.57	261.838	373.812	407.037	533.285	407.222	529.513	288.261	394.969	342.023	372.721	274.305	337.851	503.373
TKOv3_10906	CD72	207.15	205.291	279.094	371.569	419.458	446.656	387.984	350.435	201.873	245.289	321.717	216.556	198.542	315.789
TKOv3_07597	C1orf200	222.053	224.96	147.5	212.808	312.801	254.312	149.663	197.019	190.17	231.47	105.931	219.65	153.568	140.351
TKOv3_62851	TNFAIP1	210.876	233.565	275.479	301.478	269.78	170.615	394.491	294.721	345.232	252.199	340.353	254.712	372.952	392.712
TKOv3_23357	GABPB2	173.619	154.89	174.253	238.986	247.373	223.731	297.698	133.23	156.525	183.103	153.012	166.027	165.635	188.933
TKOv3_63768	TRIM2	316.686	362.64	409.964	374.102	322.66	441.023	411.572	394.038	336.455	366.206	338.392	298.023	290.683	338.731
TKOv3_23688	GAS7	245.152	239.711	352.121	236.453	302.046	243.85	299.325	257.578	336.455	419.755	248.154	437.238	392.697	400.809
TKOv3_67587	XRN2	73.0241	65.1523	1.44608	4.22237	7.17022	0	0	0	10.2399	10.3643	21.5786	9.28099	10.9692	63.4277
TKOv3_60419	TCFL5	345.747	314.698	460.577	537.931	432.902	457.923	507.551	368.199	552.956	561.401	436.476	604.295	474.965	406.207
TKOv3_25617	GPX2	203.424	170.871	177.145	161.295	128.168	156.129	130.955	147.764	159.45	150.283	202.054	119.622	145.89	233.468
TKOv3_27493	HNRNPU	261.546	266.755	116.41	129.205	95.0054	216.487	122.821	134.037	213.576	253.926	226.575	212.431	176.604	265.856
TKOv3_22010	FEN1	46.9441	61.4644	205.344	54.8909	132.649	120.718	73.2045	149.379	54.1254	70.8229	123.587	59.8108	48.2644	79.622
TKOv3_34635	MAGEC2	93.8882	111.865	78.8115	120.76	103.968	106.232	99.2328	118.696	130.193	112.28	116.721	120.653	77.8812	144.399
TKOv3_51342	RNASEH2A	309.98	299.946	92.5493	104.715	102.176	166.591	82.9651	117.081	152.136	245.289	217.748	241.306	201.833	226.72
TKOv3_59494	SYT11	184.796	215.125	71.5811	54.8909	44.8139	83.6978	61.8172	57.3292	77.5309	81.1873	90.2378	38.1552	57.0397	94.4667
TKOv3_32543	LBP	325.628	317.156	275.479	262.632	256.335	242.241	252.962	198.634	295.495	209.014	242.269	242.337	304.943	183.535
TKOv3_47770	PRKCI	221.308	248.316	297.17	395.214	511.774	369.397	374.156	264.845	327.678	245.289	252.077	265.024	213.899	242.914
TKOv3_44059	PCDHGA3	266.016	299.946	414.303	488.106	434.695	373.421	466.069	385.156	349.621	328.204	364.875	300.085	236.934	400.809
TKOv3_39869	NLRC4	373.317	394.601	327.538	433.216	277.846	344.448	259.469	342.36	330.604	319.567	360.951	261.93	266.551	344.129
TKOv3_61621	TMA16	203.424	173.33	162.684	123.293	126.375	89.3313	74.0179	196.211	111.176	101.916	97.1037	127.871	92.1411	91.7677
TKOv3_15346	CYLC2	183.305	165.954	298.616	199.296	239.306	252.703	309.086	298.758	239.907	203.832	243.25	174.276	180.991	236.167
TKOv3_22692	FOXA2	264.526	279.048	321.03	300.633	311.008	292.942	261.91	235.777	342.306	342.023	358.99	359.896	340.045	357.624
TKOv3_61088	THBS1	292.842	259.38	391.165	347.079	329.83	401.588	412.385	442.485	418.374	373.116	477.672	377.427	303.846	345.478
TKOv3_30677	KCNQ2	301.783	265.526	123.64	174.806	148.782	133.595	115.5	194.596	232.593	198.65	296.215	208.307	334.56	251.012
TKOv3_41352	OGDH	308.49	277.819	54.9511	102.181	94.1091	113.475	161.863	159.876	188.707	120.917	96.1229	203.15	196.348	172.739
TKOv3_70100	ZNF711	155.735	170.871	185.822	165.517	259.92	244.655	203.346	189.752	187.244	257.381	178.514	266.055	217.19	188.933
TKOv3_03776	ARL14EP	301.783	249.545	273.31	222.097	345.067	296.966	211.48	314.907	355.472	229.743	256.001	295.96	320.3	330.634
TKOv3_10043	CCDC34	345.002	298.717	494.56	380.014	327.141	329.158	395.304	308.447	279.404	283.292	310.928	346.49	227.062	244.264
TKOv3_22251	FGR	236.956	178.247	78.0884	183.251	87.8352	59.5542	138.275	73.4783	115.565	184.831	92.1995	184.589	149.181	102.564
TKOv3_44309	PDCD11	252.604	223.73	102.672	93.7367	127.271	152.105	106.553	106.584	80.4566	76.0051	46.0998	90.7474	134.921	51.2819
TKOv3_38940	NCOA2	278.684	244.628	374.535	397.748	353.133	389.516	174.064	303.603	394.969	304.02	329.564	341.334	261.066	340.08
TKOv3_64635	TTC5	188.521	208.979	101.949	189.162	212.418	122.327	190.332	173.603	238.444	248.744	276.599	283.586	262.163	340.08
TKOv3_57183	SNX30	304.019	320.844	388.996	350.457	328.934	388.712	358.702	480.435	355.472	367.934	321.717	443.425	337.851	450.741
TKOv3_24603	GLUL	203.424	194.227	225.589	412.948	268.883	197.173	313.966	293.106	258.924	221.106	253.058	214.494	247.903	259.109
TKOv3_14366	CRISP3	207.895	174.559	228.481	345.39	313.697	180.272	476.643	318.944	181.393	304.02	245.211	291.835	221.577	241.565
TKOv3_28801	IK	251.859	333.137	431.656	219.563	380.022	286.504	425.4	288.261	321.826	335.113	296.215	334.116	363.08	176.788
TKOv3_04834	ATP8A1	245.152	229.877	259.572	255.031	384.503	333.181	254.589	296.336	236.981	203.832	311.909	229.962	236.934	367.071
TKOv3_59821	TANGO6	204.915	175.788	306.569	368.191	294.875	216.487	439.227	394.845	232.593	291.929	182.437	246.462	257.776	203.778
TKOv3_11815	CEP63	178.089	220.043	150.393	157.917	93.2129	131.18	133.395	133.23	137.508	131.282	197.15	211.4	188.67	282.051
TKOv3_08867	CAAP1	253.349	212.667	246.557	181.562	235.721	234.998	180.571	194.596	368.638	395.572	385.472	370.208	344.432	391.362
TKOv3_52230	RPUSD4	316.686	313.468	26.0295	5.06685	34.9548	24.1436	47.1762	21.8013	217.964	169.284	152.031	144.371	198.542	164.642
TKOv3_43174	OXSR1	254.839	217.584	341.998	346.235	302.046	398.369	287.124	439.255	337.918	259.108	283.464	220.681	249	256.41
TKOv3_37328	MRPS14	220.563	216.355	224.143	179.029	197.181	80.4786	179.758	177.64	178.467	184.831	197.15	178.401	176.604	160.593
TKOv3_24794	GNG11	162.441	179.476	282.709	322.589	198.077	232.583	211.48	239.814	232.593	203.832	240.307	265.024	272.036	211.875
TKOv3_67159	WFDC11	356.179	259.38	484.438	539.619	555.692	672.801	395.304	436.025	342.306	454.303	418.821	408.363	444.252	403.508
TKOv3_45167	PHF3	84.2013	108.177	57.8433	70.9359	62.7394	78.0643	79.7116	75.0932	95.0851	103.643	106.912	87.6538	106.401	102.564
TKOv3_37814	MTMR8	128.165	127.846	205.344	225.475	225.862	75.6499	145.596	230.124	127.268	169.284	104.951	158.808	143.696	144.399
TKOv3_31894	KLRF1	149.774	115.553	177.145	292.188	167.604	346.863	200.092	364.162	196.022	133.009	206.958	192.838	146.987	265.856
TKOv3_55826	SLC35F4	186.286	173.33	167.746	221.252	205.248	220.511	146.409	168.758	288.181	191.74	219.709	214.494	210.608	203.778
TKOv3_05460	BCAT2	111.772	119.241	85.3189	133.427	103.072	114.28	132.582	72.6709	95.0851	70.8229	80.4294	67.0293	75.6873	78.2724
TKOv3_60333	TCEAL8	140.087	148.744	152.562	145.25	104.864	82.893	69.1376	150.186	130.193	136.464	119.663	158.808	180.991	106.612
TKOv3_05887	BMP10	226.524	255.692	460.577	325.123	329.83	428.951	297.698	369.814	308.661	257.381	287.388	284.617	230.353	249.662
TKOv3_07254	C18orf8	195.973	264.297	125.809	98.8036	88.7315	73.2355	167.557	62.174	181.393	190.013	237.365	187.682	212.802	215.924
TKOv3_58122	SRC	163.187	181.935	168.469	192.54	182.841	145.666	130.955	150.186	203.336	215.924	202.054	164.995	168.925	238.866
TKOv3_04573	ATP13A2	545.446	572.848	326.092	295.566	300.253	527.135	430.28	391.615	450.557	447.394	428.63	446.519	589.045	434.547
TKOv3_20969	FAM210B	197.463	253.233	176.422	189.162	113.827	157.738	231.814	248.696	163.839	196.922	191.265	182.526	142.599	209.176
TKOv3_30424	KCND3	335.315	437.626	344.891	324.278	201.662	265.579	264.35	377.888	476.888	497.488	488.461	540.36	387.212	516.868
TKOv3_29504	IPO13	114.752	98.343	52.059	23.6453	35.8511	25.7532	10.574	17.764	19.017	39.7299	42.1764	6.18732	19.7445	22.9419
TKOv3_29370	INPP5J	268.252	213.896	317.415	249.12	236.617	241.436	173.251	190.559	223.816	221.106	185.38	252.649	326.882	180.836
TKOv3_09316	CAPN7	209.386	148.744	228.481	204.363	215.107	224.535	177.318	226.087	122.879	120.917	97.1037	119.622	178.798	99.8648
TKOv3_03439	ARFIP2	285.39	260.609	391.888	350.457	321.764	283.285	490.47	310.062	261.85	350.66	357.028	254.712	318.106	304.993
TKOv3_10897	CD7	178.835	174.559	82.4267	91.2033	58.258	74.0403	77.2714	130	144.822	77.7325	119.663	76.3103	179.895	113.36
TKOv3_54187	SFRP4	365.866	382.309	407.795	314.145	360.304	309.038	432.72	330.249	342.306	354.115	502.193	435.175	315.912	402.158
TKOv3_57433	SOX8	146.048	103.26	219.081	114.004	150.575	92.5504	132.582	150.994	78.9938	95.0064	49.0423	55.6859	138.212	79.622
TKOv3_70622	ZW10	206.405	184.393	28.1986	64.1801	41.2288	74.8451	60.1904	60.559	62.9024	124.372	59.8316	112.403	77.8812	62.0781
TKOv3_46738	POLR3H	239.191	269.214	15.9069	16.045	16.133	7.24308	21.148	18.5714	7.31424	27.6382	16.6744	17.5308	10.9692	4.04857
TKOv3_51868	RPE65	171.383	181.935	117.856	186.629	166.708	180.272	277.364	213.975	181.393	138.191	176.552	127.871	109.692	109.312
TKOv3_43011	OSTM1	423.987	431.48	550.234	481.351	639.942	622.904	684.056	574.1	718.258	632.224	538.484	569.234	657.054	592.441
TKOv3_40082	NODAL	383.749	356.493	311.631	354.679	322.66	286.504	524.632	444.1	394.969	483.669	421.764	376.396	293.974	402.158
TKOv3_55390	SLC25A19	203.424	159.807	79.5345	55.7353	44.8139	115.084	108.18	117.888	137.508	174.466	131.433	168.089	145.89	178.137
TKOv3_19255	ENDOD1	122.949	106.948	52.782	30.4011	92.3166	70.8212	109.807	83.1678	64.3653	100.189	112.797	76.3103	73.4935	94.4667
TKOv3_15810	DCAF12L1	279.429	253.233	215.466	296.411	390.777	346.863	250.522	300.373	220.89	283.292	262.867	265.024	280.811	248.313
TKOv3_23822	GCC2	58.8664	35.6493	49.8898	57.4243	71.7022	75.6499	40.6692	77.5156	21.9427	32.8204	59.8316	15.4683	27.4229	41.8353
TKOv3_34058	LSMEM2	176.599	141.368	140.993	148.628	172.085	103.013	186.265	149.379	149.21	212.469	177.533	134.059	223.771	125.506
TKOv3_60299	TCAP	172.873	127.846	96.8875	135.96	251.854	166.591	151.289	155.839	197.484	176.194	160.859	145.402	250.097	188.933
TKOv3_34468	M6PR	305.509	349.118	379.597	456.861	405.117	347.668	338.368	426.336	421.3	452.576	335.449	410.426	416.829	406.207
TKOv3_28546	IFNG	203.424	283.965	263.187	349.613	319.075	309.038	248.082	377.888	304.272	240.107	317.794	252.649	387.212	304.993
TKOv3_27967	HSD3B7	178.835	133.992	146.777	114.004	109.346	86.1121	96.7926	231.739	188.707	134.736	157.916	256.774	254.485	179.487
TKOv3_04686	ATP5G1	369.592	334.366	285.601	339.479	309.216	236.607	239.135	332.671	329.141	362.752	366.836	331.022	371.855	284.75
TKOv3_63880	TRIM5	190.012	207.75	198.113	161.295	233.928	283.285	261.91	209.938	184.319	126.099	172.629	174.276	206.221	168.691
TKOv3_65343	UBN2	242.172	319.615	271.14	265.165	319.971	392.736	479.896	357.702	238.444	328.204	305.043	313.491	356.498	279.352
TKOv3_67690	YIPF6	143.813	170.871	176.422	163.828	137.13	105.427	182.198	144.534	169.69	169.284	136.338	110.341	190.864	129.554
TKOv3_11371	CDK9	211.621	266.755	2.16912	0	0	32.1914	4.06692	1.61491	11.7028	0	19.6169	14.4371	27.4229	8.09715
TKOv3_32738	LECT1	186.286	168.412	287.77	319.212	277.846	176.248	273.297	276.149	201.873	188.285	211.863	202.119	221.577	194.332
TKOv3_01826	AK4	218.327	367.557	128.701	108.937	146.093	122.327	192.772	165.528	171.153	210.741	152.031	200.057	184.282	147.098
TKOv3_16000	DCUN1D2	250.368	303.634	227.035	243.209	246.476	258.336	300.952	310.062	244.296	262.563	250.116	229.962	254.485	213.225
TKOv3_16861	DKK3	242.172	295.029	521.313	238.142	343.274	209.244	357.075	381.926	449.094	343.75	369.779	315.554	341.141	417.003
TKOv3_00771	ACSL5	222.798	196.686	98.3336	146.094	243.787	300.99	174.877	222.05	242.833	195.195	284.445	214.494	295.071	298.245
TKOv3_68412	ZFP91	268.997	287.653	177.868	336.945	226.758	202.806	290.378	163.106	343.769	293.656	369.779	265.024	289.586	331.983
TKOv3_08648	C9orf114	266.762	256.921	102.672	70.0914	59.1543	74.0403	106.553	86.3976	77.5309	89.8242	74.5443	91.7786	78.9781	76.9229
TKOv3_00680	ACOT9	207.15	161.037	104.841	181.562	88.7315	138.423	61.8172	34.7205	106.788	200.377	131.433	245.431	115.176	164.642
TKOv3_02681	ANKRD40	206.405	188.081	127.978	165.517	226.758	207.635	179.758	167.95	217.964	209.014	205.978	327.928	141.502	207.827
TKOv3_04743	ATP6V0A2	228.014	206.52	123.64	135.116	136.234	169.005	107.367	126.77	152.136	96.7338	137.318	160.87	137.115	160.593
TKOv3_08304	C5orf52	182.56	159.807	140.27	282.055	155.056	244.655	204.973	226.087	131.656	203.832	193.227	194.901	146.987	167.341
TKOv3_67421	WWP1	242.917	266.755	201.005	187.473	140.716	164.176	405.065	230.932	304.272	260.836	258.943	283.586	375.146	298.245
TKOv3_11069	CDC42EP2	400.142	357.723	365.859	386.77	459.79	295.357	226.934	457.019	356.935	428.392	455.112	301.116	355.401	460.188
TKOv3_63230	TOP3A	194.483	168.412	16.6299	20.2674	49.2953	7.24308	16.2677	12.1118	54.1254	60.4586	48.0614	45.3737	30.7137	20.2429
TKOv3_20003	EVI5L	378.533	392.143	388.996	242.364	251.854	275.237	407.505	331.864	317.438	443.939	423.725	454.768	308.234	541.16
TKOv3_27724	HPCAL4	241.427	224.96	107.733	105.559	147.886	106.232	155.356	142.112	181.393	177.921	176.552	151.589	204.027	233.468
TKOv3_00538	ACAP2	232.485	180.705	162.684	171.428	182.841	161.762	240.762	222.857	315.975	304.02	280.522	384.645	398.181	360.323
TKOv3_55972	SLC39A9	192.992	164.725	208.236	145.25	204.351	101.403	173.251	155.839	181.393	169.284	167.725	178.401	221.577	187.584
TKOv3_05595	BCS1L	134.126	124.158	22.4143	6.7558	9.85905	34.6058	41.4826	21.8013	84.8452	58.7312	41.1955	57.7484	76.7842	36.4372
TKOv3_10697	CD200R1	249.623	367.557	266.802	365.658	299.357	258.336	327.794	218.013	305.735	309.203	294.254	323.803	357.595	422.401
TKOv3_61841	TMEM126B	245.898	186.852	327.538	355.524	299.357	375.03	475.829	440.87	314.512	190.013	300.139	235.118	281.908	242.914
TKOv3_45183	PHF8	148.284	174.559	92.5493	111.471	90.524	185.101	110.62	184.1	114.102	136.464	135.357	181.495	146.987	117.409
TKOv3_32325	LACTB	131.891	102.031	157.623	133.427	146.093	121.523	147.222	146.149	89.2337	62.186	82.391	131.996	69.1058	101.214
TKOv3_59723	TAF1L	169.893	180.705	207.513	122.449	161.33	193.953	264.35	237.391	150.673	143.373	157.916	151.589	133.824	139.001
TKOv3_27417	HNF1B	247.388	232.335	270.417	205.207	207.936	197.173	348.942	242.236	330.604	300.566	323.679	232.025	263.26	327.935
TKOv3_58182	SRI	309.98	352.806	373.812	485.573	382.711	337.205	438.414	359.317	296.958	399.027	369.779	281.523	284.102	350.876
TKOv3_29800	ISYNA1	271.233	248.316	158.346	196.763	232.136	309.843	282.244	288.261	361.323	338.568	326.622	309.366	340.045	388.663
TKOv3_03840	ARL8A	215.347	217.584	219.804	228.853	136.234	193.953	163.49	204.286	162.376	122.645	112.797	169.12	179.895	139.001
TKOv3_20017	EVPLL	266.016	238.482	323.922	305.7	295.772	246.265	274.924	204.286	219.427	257.381	239.326	255.743	214.996	180.836
TKOv3_49197	PYY	271.978	275.36	148.223	124.982	232.136	185.101	113.874	143.727	185.782	207.287	141.242	163.964	137.115	144.399
TKOv3_44979	PGGT1B	195.973	174.559	277.648	248.276	328.038	127.961	215.547	313.292	231.13	271.2	270.713	261.93	291.78	260.458
TKOv3_20656	FAM161B	207.895	280.278	201.728	157.072	247.373	173.834	223.68	278.572	253.073	267.745	204.016	238.212	261.066	229.419
TKOv3_58442	SSTR5	172.873	114.324	102.672	103.026	125.479	57.9446	110.62	73.4783	77.5309	115.735	126.529	103.122	115.176	145.749
TKOv3_04420	ATF7IP	226.524	215.125	133.04	112.315	144.301	130.375	104.113	146.957	308.661	248.744	215.786	126.84	180.991	194.332
TKOv3_35305	MBD2	146.048	111.865	84.5958	202.674	213.314	65.9925	73.2045	143.727	128.731	133.009	118.682	181.495	133.824	145.749
TKOv3_34848	MAP2	238.446	207.75	251.618	278.677	318.179	210.854	374.156	219.627	267.701	193.468	207.939	171.183	244.613	242.914
TKOv3_24898	GOLGA1	151.264	135.222	239.327	204.363	134.442	279.261	143.156	153.416	207.724	136.464	96.1229	138.184	189.767	90.4182
TKOv3_07802	C20orf96	274.958	261.838	358.628	352.991	311.905	236.607	350.568	251.926	263.313	231.47	197.15	162.933	290.683	275.303
TKOv3_24209	GIGYF1	258.565	229.877	390.442	393.525	397.051	333.181	427.84	264.037	257.461	279.837	274.637	373.302	385.018	314.439
TKOv3_48276	PRSS58	248.878	276.59	348.506	348.768	376.437	379.054	309.899	483.665	258.924	245.289	280.522	196.963	365.274	198.38
TKOv3_29480	IP6K1	189.267	178.247	140.27	188.318	178.359	169.81	117.941	112.236	191.633	203.832	172.629	186.651	168.925	139.001
TKOv3_34205	LY6K	409.829	360.181	379.597	283.744	269.78	285.699	343.248	352.05	383.266	354.115	428.63	232.025	405.86	307.692
TKOv3_29015	IL20	155.735	168.412	211.851	185.784	216.899	243.85	164.303	198.634	168.227	210.741	147.127	211.4	123.952	192.982
TKOv3_67604	XYLT2	277.194	283.965	239.327	153.694	224.966	236.607	129.328	116.273	100.936	152.01	201.073	188.713	171.119	284.75
TKOv3_32562	LCA5L	222.053	240.94	224.143	238.142	274.261	291.333	339.994	193.789	264.775	309.203	228.537	282.554	264.357	251.012
TKOv3_61412	TJP2	195.973	130.305	241.496	248.276	293.979	210.049	178.131	216.398	206.261	198.65	231.48	260.899	235.837	249.662
TKOv3_37950	MUC6	261.546	319.615	163.407	177.34	123.686	112.67	69.951	91.2423	198.947	167.557	161.84	116.528	202.93	125.506
TKOv3_53432	SDPR	195.973	172.1	224.143	257.565	270.676	259.141	269.23	234.969	241.37	198.65	246.192	307.304	293.974	238.866
TKOv3_00548	ACAT1	140.832	148.744	221.251	173.962	140.716	176.248	154.543	180.87	244.296	162.375	138.299	141.277	255.582	130.904
TKOv3_62862	TNFAIP6	228.759	279.048	276.202	286.277	263.506	192.344	309.899	282.609	266.238	314.385	312.89	295.96	319.203	402.158
TKOv3_42362	OR52H1	175.854	174.559	221.251	162.984	324.452	169.81	157.796	179.255	263.313	215.924	211.863	207.275	234.74	209.176
TKOv3_18767	EIF2B1	284.645	324.532	163.407	206.896	250.061	140.033	228.561	227.702	152.136	200.377	172.629	260.899	206.221	188.933
TKOv3_60935	TG	157.225	175.788	198.836	358.057	225.862	204.416	316.406	195.404	178.467	226.288	180.476	218.619	206.221	188.933
TKOv3_31057	KIAA0825	238.446	253.233	370.197	238.142	350.445	339.62	331.047	258.385	361.323	324.749	479.634	336.178	408.053	349.527
TKOv3_64374	TSPAN3	221.308	174.559	218.358	268.543	267.091	171.419	334.301	284.224	210.65	127.827	205.978	125.809	205.124	201.079
TKOv3_45784	PLA1A	166.912	131.534	96.8875	104.715	149.678	161.762	78.0848	170.373	103.862	122.645	103.97	131.996	170.022	175.438
TKOv3_28500	IFITM10	190.757	173.33	283.432	202.674	196.285	218.902	123.634	122.733	174.079	167.557	173.61	139.215	191.961	117.409
TKOv3_39193	NDUFB9	192.247	224.96	200.282	266.01	284.12	204.416	350.568	226.895	361.323	279.837	206.958	273.274	257.776	175.438
TKOv3_34512	MAD2L1BP	149.029	258.15	117.133	100.493	63.6357	100.598	72.3911	99.3168	147.748	186.558	162.82	157.777	188.67	129.554
TKOv3_28383	IDI1	271.978	288.883	78.8115	55.7353	45.7102	95.7696	62.6305	67.8261	258.924	145.101	186.361	206.244	243.516	252.361
TKOv3_50808	RGAG4	230.25	315.927	302.231	328.501	279.639	259.141	343.248	305.218	272.09	253.926	220.69	213.463	253.388	206.477
TKOv3_43533	PAPL	218.327	248.316	308.016	340.323	233.032	225.34	295.258	213.975	226.741	380.026	265.809	408.363	334.56	286.099
TKOv3_51956	RPL27	105.065	164.725	20.9682	8.44475	8.96278	8.04786	13.8275	8.88199	35.1083	24.1834	27.4637	22.6869	17.5507	36.4372
TKOv3_44778	PET112	81.9659	74.9866	79.5345	62.4911	66.3245	64.3829	90.2856	67.0187	83.3823	63.9134	81.4102	51.561	57.0397	80.9715
TKOv3_24456	GLI3	114.752	140.139	154.731	232.231	178.359	189.125	136.648	184.907	222.353	152.01	173.61	203.15	258.873	182.186
TKOv3_59696	TAF12	162.441	245.858	10.8456	13.5116	6.27394	36.2154	1.62677	0	2.92569	3.45478	9.80846	12.3746	20.8414	18.8933
TKOv3_24693	GNA11	254.839	215.125	238.604	161.295	344.171	206.025	246.455	285.031	117.028	203.832	215.786	270.18	217.19	179.487
TKOv3_19895	ETAA1	191.502	210.208	291.386	266.854	310.112	221.316	214.733	201.056	181.393	181.376	248.154	183.557	164.538	161.943
TKOv3_16299	DEFB1	210.131	169.642	230.65	255.876	233.928	292.942	322.913	356.895	277.941	202.104	209.901	188.713	209.511	232.118
TKOv3_50689	REXO2	457.519	433.939	85.3189	115.693	103.072	103.817	160.237	109.006	361.323	326.476	295.235	365.052	382.824	302.294
TKOv3_63466	TPRX1	268.997	318.386	728.825	436.594	455.309	379.859	376.597	427.951	371.563	418.028	482.576	417.644	344.432	438.596
TKOv3_69866	ZNF621	339.786	429.021	288.493	150.317	198.077	268.799	268.417	188.137	162.376	152.01	184.399	193.87	182.088	279.352
TKOv3_57415	SOX30	201.189	227.418	218.358	252.498	216.899	229.364	339.181	272.112	194.559	141.646	180.476	163.964	229.256	157.894
TKOv3_29723	IRX4	371.082	312.239	391.888	390.992	449.931	392.736	494.537	577.33	506.145	514.762	486.5	471.268	540.78	497.975
TKOv3_31874	KLLN	121.459	114.324	113.517	79.3806	148.782	80.4786	80.525	79.1305	109.714	93.279	87.2953	74.2479	98.7226	101.214
TKOv3_02853	ANTXR2	291.351	280.278	338.383	332.723	418.562	339.62	306.646	483.665	310.124	312.657	406.07	255.743	374.049	318.488
TKOv3_16567	DGKE	312.215	328.22	295.001	301.478	276.95	279.261	398.558	242.236	334.992	336.841	311.909	298.023	375.146	307.692
TKOv3_23080	FTSJ1	347.237	245.858	417.195	441.66	360.304	404.003	366.836	218.013	318.901	376.571	344.277	375.364	435.476	302.294
TKOv3_44689	PEAK1	252.604	269.214	403.457	268.543	327.141	322.719	343.248	322.982	198.947	191.74	304.062	233.056	206.221	249.662
TKOv3_46459	PNPLA2	377.788	304.863	195.221	327.656	320.867	252.703	210.666	270.497	299.884	297.111	358.99	385.677	420.12	475.033
TKOv3_55654	SLC2A5	324.138	388.455	196.667	153.694	103.072	111.06	144.782	171.988	150.673	183.103	192.246	111.372	116.273	156.545
TKOv3_41917	OR2AT4	222.053	239.711	369.474	291.344	354.03	255.922	282.244	211.553	283.792	369.661	293.273	275.336	313.719	272.604
TKOv3_56759	SMIM20	225.779	218.813	353.567	305.7	283.224	276.846	273.297	328.634	210.65	328.204	216.767	338.24	251.194	326.585
TKOv3_15776	DBP	301.038	323.303	179.314	158.761	193.596	288.918	269.23	259.193	156.525	283.292	264.828	321.741	414.635	232.118
TKOv3_22577	FN3K	189.267	206.52	215.466	132.583	118.309	199.587	145.596	224.472	172.616	243.562	208.92	263.993	286.296	228.07
TKOv3_35376	MBTD1	189.267	244.628	31.0908	81.9141	43.0213	42.6537	102.486	27.4534	226.741	181.376	197.15	136.121	161.247	139.001
TKOv3_49180	PYHIN1	195.973	275.36	219.081	251.654	202.559	284.894	191.959	252.733	304.272	316.112	281.503	321.741	383.921	345.478
TKOv3_16097	DDTL	160.206	137.68	172.084	217.875	201.662	350.887	229.374	275.342	188.707	179.648	140.261	213.463	229.256	168.691
TKOv3_46792	PON1	112.517	84.8209	101.949	124.138	108.45	143.252	86.2187	120.311	103.862	101.916	127.51	62.9045	69.1058	129.554
TKOv3_44530	PDIA6	145.303	113.094	181.483	176.495	193.596	252.703	104.926	122.733	89.2337	117.462	132.414	91.7786	63.6212	94.4667
TKOv3_02382	AMZ1	180.325	178.247	201.728	145.25	155.056	222.121	174.064	116.273	152.136	95.0064	100.046	144.371	154.665	106.612
TKOv3_52629	RYR3	203.424	199.145	313.8	267.699	245.58	147.276	238.321	188.137	185.782	200.377	165.763	275.336	234.74	117.409
TKOv3_48156	PRRG3	165.422	156.12	175.699	134.272	162.226	98.1839	122.821	138.075	106.788	108.825	153.012	164.995	148.084	99.8648
TKOv3_65022	TYRO3	221.308	180.705	135.209	132.583	116.516	49.092	117.127	92.0498	204.799	215.924	118.682	254.712	184.282	160.593
TKOv3_34807	MANSC1	74.5144	76.2158	93.9953	61.6467	53.7767	37.0202	83.7785	92.8572	124.342	81.1873	99.0654	102.091	109.692	145.749
TKOv3_15807	DCAF12L1	220.563	177.017	269.694	236.453	197.181	163.372	165.93	237.391	166.765	155.465	204.997	210.369	182.088	211.875
TKOv3_56633	SMC1A	155.735	190.54	7.95345	0	24.1995	1.60957	10.574	29.8758	14.6285	20.7287	28.4445	16.4995	32.9075	24.2914
TKOv3_52165	RPS6KA2	184.796	231.106	187.268	218.719	170.293	123.937	143.156	114.658	166.765	198.65	192.246	187.682	191.961	155.195
TKOv3_15899	DCHS1	169.893	167.183	120.748	136.805	190.011	139.228	169.184	150.994	130.193	212.469	202.054	171.183	150.278	284.75
TKOv3_34953	MAP4K2	157.971	153.661	221.251	238.986	229.447	131.18	146.409	167.143	106.788	177.921	229.518	169.12	177.701	221.322
TKOv3_58499	ST6GAL1	133.381	100.802	195.944	219.563	237.514	80.4786	91.099	164.721	160.913	143.373	216.767	160.87	138.212	134.952
TKOv3_49870	RAP2A	162.441	175.788	140.27	267.699	423.043	206.025	229.374	138.882	226.741	158.92	237.365	159.839	280.811	203.778
TKOv3_31886	KLRC3	170.638	169.642	196.667	189.162	203.455	149.69	289.565	109.814	179.93	122.645	174.591	134.059	213.899	163.293
TKOv3_35369	MBOAT7	102.83	115.553	76.6424	107.248	125.479	172.224	83.7785	173.603	197.484	108.825	163.801	87.6538	204.027	157.894
TKOv3_30049	IVNS1ABP	172.873	174.559	391.165	292.188	202.559	260.751	321.287	224.472	254.535	209.014	277.579	191.807	211.705	203.778
TKOv3_22673	FOSB	126.675	154.89	159.069	242.364	198.974	215.683	196.025	136.46	163.839	219.378	145.165	223.775	174.41	125.506
TKOv3_50071	RASSF8	187.776	229.877	155.454	293.877	159.537	241.436	155.356	171.18	219.427	119.19	168.705	157.777	213.899	198.38
TKOv3_67995	ZBTB8A	211.621	208.979	233.542	222.941	265.298	180.272	213.107	218.82	179.93	228.015	208.92	261.93	156.859	236.167
TKOv3_18366	EDC4	324.138	266.755	152.562	276.988	201.662	218.902	139.902	303.603	152.136	234.925	243.25	178.401	131.63	140.351
TKOv3_55395	SLC25A2	259.31	181.935	161.961	195.074	142.508	176.248	238.321	147.764	226.741	172.739	168.705	277.398	283.005	168.691
TKOv3_68026	ZC3H12A	179.58	157.349	218.358	178.184	169.396	263.97	336.741	348.013	241.37	252.199	187.342	263.993	207.317	210.526
TKOv3_45970	PLCH1	227.269	244.628	135.209	140.183	125.479	198.782	349.755	234.162	201.873	193.468	201.073	183.557	213.899	195.681
TKOv3_67298	WNT16	224.288	244.628	456.239	374.947	212.418	364.568	250.522	283.416	308.661	259.108	243.25	210.369	251.194	184.885
TKOv3_05488	BCL10	225.034	228.648	263.91	223.786	222.277	211.659	174.877	173.603	191.633	212.469	208.92	153.652	235.837	222.672
TKOv3_61947	TMEM150B	224.288	215.125	248.726	187.473	181.944	318.695	204.973	281.801	144.822	108.825	125.548	205.213	138.212	213.225
TKOv3_01770	AIG1	350.218	385.996	284.155	157.917	314.593	150.495	321.287	158.261	185.782	219.378	187.342	255.743	191.961	161.943
TKOv3_32661	LCT	330.099	342.971	227.758	249.965	267.987	458.728	395.304	282.609	365.712	359.297	267.771	339.272	333.463	294.196
TKOv3_12130	CHFR	236.211	210.208	277.648	215.341	287.705	267.189	222.867	275.342	217.964	259.108	217.748	246.462	250.097	210.526
TKOv3_23835	GCG	213.111	196.686	297.17	294.722	167.604	217.292	217.987	250.311	244.296	238.38	166.744	261.93	268.745	294.196
TKOv3_64396	TSPAN6	242.172	240.94	282.709	293.033	207.04	316.281	339.181	245.466	301.347	200.377	271.694	239.243	303.846	273.954
TKOv3_21948	FCRL4	361.395	313.468	401.288	476.284	683.86	629.343	539.273	446.522	607.082	480.214	509.059	605.327	635.115	587.043
TKOv3_08935	CACNA1C	165.422	186.852	105.564	60.8022	88.7315	45.068	162.677	104.162	112.639	76.0051	97.1037	101.06	84.4627	112.011
TKOv3_07689	C1orf64	233.23	234.794	274.756	252.498	171.189	280.87	190.332	163.106	210.65	257.381	189.303	217.588	235.837	244.264
TKOv3_33536	LRFN3	189.267	207.75	168.469	177.34	123.686	252.703	218.8	136.46	200.41	196.922	199.112	316.585	240.225	221.322
TKOv3_04332	ASUN	181.815	137.68	104.841	92.0478	132.649	59.5542	36.6023	144.534	169.69	110.553	175.571	135.09	122.855	141.7
TKOv3_61622	TMA16	119.223	111.865	32.5368	5.91132	20.6144	57.9446	30.9086	12.1118	5.85139	22.4561	36.2913	21.6556	21.9384	51.2819
TKOv3_36144	MFSD9	271.233	226.189	108.456	159.606	215.107	186.71	155.356	170.373	197.484	207.287	174.591	206.244	219.384	174.089
TKOv3_20330	FAF1	178.835	175.788	82.4267	53.2019	48.399	127.961	51.2432	89.6274	83.3823	119.19	149.089	114.466	127.242	102.564
TKOv3_53852	SERINC2	199.699	172.1	120.748	109.782	146.093	140.838	266.79	157.454	128.731	134.736	111.816	120.653	91.0442	153.846
TKOv3_61512	TLR3	108.046	118.012	274.033	356.368	276.95	189.93	145.596	245.466	179.93	172.739	212.844	140.246	137.115	205.128
TKOv3_62352	TMEM249	149.029	146.285	142.439	51.513	95.0054	193.149	77.2714	47.6398	106.788	122.645	122.606	68.0606	118.467	107.962
TKOv3_25218	GPR116	309.235	341.742	381.766	347.079	336.104	294.552	446.548	245.466	343.769	271.2	328.583	351.646	392.697	430.498
TKOv3_18875	EIF4E1B	274.958	276.59	165.576	328.501	362.992	417.684	251.336	222.857	194.559	174.466	264.828	192.838	194.154	180.836
TKOv3_34309	LYSMD2	397.907	387.226	639.168	695.847	723.296	785.471	673.482	930.994	538.328	514.762	452.17	511.485	456.318	483.13
TKOv3_61438	TKTL2	230.25	195.457	296.447	191.696	308.319	292.137	405.065	272.919	304.272	160.647	169.686	248.524	197.445	218.623
TKOv3_01329	ADIRF	206.405	191.769	184.375	190.007	152.367	173.834	83.7785	139.69	77.5309	114.008	98.0846	92.8099	141.502	94.4667
TKOv3_22013	FEN1	195.228	185.622	50.6129	36.3124	11.6516	6.43829	26.8417	6.45963	83.3823	89.8242	83.3719	44.3425	50.4582	41.8353
TKOv3_31557	KLF10	159.461	157.349	190.16	180.718	266.194	214.073	217.173	251.926	212.113	207.287	194.207	205.213	201.833	219.973
TKOv3_02324	AMIGO2	204.915	239.711	80.2576	133.427	103.072	113.475	85.4053	149.379	149.21	119.19	144.184	71.1542	219.384	148.448
TKOv3_57884	SPINT1	163.187	175.788	208.959	244.898	170.293	242.241	239.948	286.646	267.701	174.466	234.422	207.275	238.031	228.07
TKOv3_19413	EP300	242.917	254.463	206.067	125.827	203.455	185.906	216.36	207.516	257.461	186.558	262.867	325.866	387.212	468.285
TKOv3_57739	SPDYE3	161.696	143.827	146.777	287.121	148.782	156.129	104.926	183.292	112.639	152.01	139.28	153.652	108.595	113.36
TKOv3_23317	GAB2	258.565	328.22	254.51	164.673	153.263	193.149	264.35	186.522	311.587	271.2	256.001	207.275	244.613	272.604
TKOv3_14785	CTAGE5	262.291	354.035	279.094	233.92	218.692	322.719	309.899	301.18	263.313	298.838	282.484	292.867	204.027	263.157
TKOv3_70318	ZNF823	304.019	277.819	447.562	369.88	285.913	371.006	346.501	265.652	368.638	276.382	290.33	309.366	319.203	313.09
TKOv3_30016	ITPR3	220.563	221.272	234.265	255.876	251.854	206.83	192.772	255.155	248.684	229.743	206.958	187.682	256.679	245.614
TKOv3_66570	VPS4B	313.706	276.59	294.278	235.608	349.548	284.09	132.582	199.441	213.576	343.75	293.273	278.43	258.873	255.06
TKOv3_69755	ZNF583	137.107	121.699	227.758	134.272	147.886	238.217	140.715	185.714	109.714	86.3694	121.625	102.091	100.916	143.05
TKOv3_61454	TLDC2	120.713	114.324	104.841	104.715	97.6943	151.3	166.744	157.454	119.953	129.554	122.606	102.091	152.472	106.612
TKOv3_49979	RASEF	165.422	170.871	214.743	137.649	285.913	247.069	95.9793	314.1	191.633	219.378	201.073	229.962	142.599	194.332
TKOv3_20118	EXOSC4	331.589	315.927	60.7355	24.4898	51.0878	90.136	61.0038	85.5901	43.8854	34.5478	49.0423	37.1239	30.7137	101.214
TKOv3_61223	THY1	136.361	167.183	96.8875	208.585	120.101	173.834	112.247	191.367	177.005	272.927	226.575	221.712	227.062	213.225
TKOv3_15065	CUTC	193.738	130.305	221.974	173.962	147.886	177.858	237.508	161.491	40.9597	77.7325	102.989	106.216	77.8812	120.108
TKOv3_15892	DCDC2B	131.891	105.719	56.3972	70.9359	68.1171	49.8967	76.4581	96.087	124.342	82.9147	114.759	108.278	111.886	136.302
TKOv3_12435	CHTF18	152.755	152.432	60.7355	72.6248	86.9389	47.4824	155.356	101.739	96.5479	95.0064	98.0846	69.0918	60.3305	68.8258
TKOv3_16430	DENND5A	138.597	93.4259	102.672	134.272	175.67	107.841	104.113	121.118	108.251	134.736	153.993	147.465	121.758	222.672
TKOv3_69419	ZNF462	254.094	290.112	321.753	363.969	342.378	460.338	331.861	343.168	374.489	278.11	272.675	273.274	372.952	321.187
TKOv3_19107	EMB	159.461	200.374	120.748	206.896	244.684	170.615	290.378	175.218	247.221	219.378	295.235	275.336	228.159	180.836
TKOv3_18343	ECT2L	340.531	342.971	174.976	280.366	245.58	181.077	215.547	251.926	225.279	250.471	288.369	229.962	219.384	261.808
TKOv3_66054	USP5	450.812	373.704	180.76	222.941	86.9389	231.778	235.068	406.149	147.748	217.651	227.556	211.4	121.758	161.943
TKOv3_22379	FKBP1C	204.17	113.094	229.927	219.563	236.617	181.077	249.709	262.423	196.022	198.65	276.599	209.338	214.996	326.585
TKOv3_01411	ADRA2A	189.267	168.412	108.456	123.293	103.072	182.686	114.687	166.336	225.279	162.375	216.767	155.714	184.282	218.623
TKOv3_12506	CIR1	187.776	183.164	212.574	193.385	190.011	157.738	138.275	180.062	80.4566	114.008	92.1995	103.122	161.247	116.059
TKOv3_35307	MBD3	84.9464	61.4644	49.1668	151.161	111.138	78.869	113.06	109.814	38.034	41.4573	71.6017	46.4049	59.2336	109.312
TKOv3_06556	C10orf91	97.6139	105.719	203.175	101.337	108.45	131.985	206.599	80.7454	98.0108	79.4599	99.0654	138.184	76.7842	109.312
TKOv3_04403	ATF4	174.364	181.935	255.957	128.36	180.152	240.631	325.353	259.193	175.542	219.378	265.809	248.524	209.511	253.711
TKOv3_19599	EPS8L1	251.114	297.488	193.052	193.385	178.359	341.229	356.262	296.336	266.238	259.108	242.269	315.554	370.758	269.905
TKOv3_55715	SLC31A1	421.752	389.684	302.954	255.876	311.008	296.966	372.53	297.951	311.587	342.023	335.449	393.926	303.846	458.838
TKOv3_37116	MROH7	77.495	43.0251	35.429	4.22237	20.6144	20.9244	37.4156	27.4534	38.034	13.8191	36.2913	63.9357	76.7842	25.641
TKOv3_09781	CCDC115	212.366	232.335	88.211	103.026	88.7315	105.427	35.7889	59.7516	152.136	177.921	153.993	115.497	72.3966	136.302
TKOv3_38050	MYADM	216.092	221.272	185.099	162.139	257.232	328.353	178.944	220.435	138.971	181.376	228.537	228.931	250.097	291.497
TKOv3_64840	TUBGCP5	257.82	285.195	49.8898	59.9577	58.258	45.068	71.5778	54.0994	118.491	82.9147	107.893	83.5289	57.0397	49.9324
TKOv3_65594	UHRF1BP1	294.332	272.902	151.116	307.389	154.16	194.758	247.269	206.708	247.221	350.66	242.269	218.619	219.384	202.429
TKOv3_32575	LCE3B	272.723	334.366	443.224	417.171	402.429	431.365	589.703	511.926	367.175	459.485	458.055	440.331	524.327	396.76
TKOv3_07459	C1S	105.81	87.2794	143.162	168.051	232.136	168.2	139.089	114.658	150.673	160.647	99.0654	107.247	117.37	130.904
TKOv3_09464	CASKIN1	235.466	279.048	177.868	109.782	135.338	185.101	130.955	177.64	147.748	158.92	160.859	144.371	99.8195	101.214
TKOv3_63355	TPCN2	223.543	188.081	313.8	176.495	176.567	185.101	126.074	180.87	374.489	293.656	237.365	278.43	306.04	310.391
TKOv3_00084	AAR2	131.891	147.515	187.268	169.739	114.724	94.9648	191.145	167.95	165.302	129.554	100.046	140.246	104.207	95.8163
TKOv3_29564	IQCF3	308.49	215.125	369.474	254.187	269.78	275.237	251.336	406.957	311.587	190.013	207.939	178.401	273.133	186.234
TKOv3_26617	HDAC3	93.143	67.6108	29.6447	21.9563	24.1995	0	26.0283	12.9193	43.8854	38.0026	24.5211	18.562	32.9075	1.34952
TKOv3_32013	KRCC1	283.155	306.093	255.234	245.742	322.66	334.791	345.688	226.087	399.357	300.566	219.709	367.115	289.586	367.071
TKOv3_44599	PDPR	266.016	301.176	203.898	235.608	185.529	208.44	125.261	160.683	184.319	226.288	198.131	269.149	291.78	269.905
TKOv3_35179	MARS	327.863	263.068	208.959	283.744	138.027	124.742	382.29	306.833	242.833	198.65	230.499	217.588	175.507	153.846
TKOv3_50090	RAX	335.315	361.411	383.935	273.61	345.963	335.596	357.889	335.093	475.425	369.661	344.277	380.52	348.82	423.751
TKOv3_19501	EPHA5	344.257	281.507	349.229	353.835	480.405	498.967	352.195	482.05	327.678	321.294	368.798	368.146	376.243	496.625
TKOv3_29327	INO80C	199.699	173.33	130.87	184.94	169.396	100.598	135.022	130.808	190.17	295.383	137.318	225.837	233.643	170.04
TKOv3_55828	SLC35F4	114.752	118.012	109.902	138.494	172.085	114.28	126.888	191.367	157.988	158.92	143.203	191.807	191.961	121.457
TKOv3_64287	TSHZ1	365.866	333.137	304.4	321.745	311.905	346.863	372.53	369.006	258.924	314.385	405.089	249.555	312.622	279.352
TKOv3_65437	UBXN6	158.716	184.393	388.273	201.83	341.482	266.384	475.016	153.416	184.319	234.925	242.269	261.93	257.776	276.653
TKOv3_28639	IGF1	450.067	308.551	463.469	336.945	447.242	409.636	454.681	377.888	346.695	367.934	359.97	372.271	301.652	322.536
TKOv3_60929	TFRC	195.228	255.692	303.677	328.501	233.928	307.428	326.98	192.982	279.404	252.199	238.346	191.807	191.961	168.691
TKOv3_47900	PROCA1	248.133	272.902	175.699	181.562	85.1464	193.149	69.951	109.814	152.136	131.282	199.112	116.528	185.379	244.264
TKOv3_57202	SNX5	374.808	322.073	439.609	478.817	484.886	408.831	379.85	570.87	522.237	613.223	403.128	502.205	470.578	391.362
TKOv3_07388	C1GALT1C1	296.567	352.806	367.305	354.679	414.977	354.106	244.015	247.888	231.13	266.018	304.062	284.617	244.613	287.449
TKOv3_43375	PAG1	200.444	221.272	220.528	250.809	338.793	458.728	165.117	198.634	244.296	183.103	270.713	309.366	300.555	255.06
TKOv3_67694	YIPF7	127.42	86.0502	114.964	122.449	87.8352	92.5504	86.2187	100.932	83.3823	114.008	111.816	148.496	170.022	101.214
TKOv3_04074	ARX	293.587	298.717	295.724	218.719	368.37	306.624	300.952	221.242	250.147	305.748	360.951	250.587	259.97	394.061
TKOv3_23211	FXYD7	254.094	279.048	342.721	459.394	381.814	341.229	246.455	438.448	453.483	291.929	429.61	332.053	468.384	442.644
TKOv3_54393	SH2D7	252.604	205.291	258.126	332.723	352.237	165.786	172.437	194.596	236.981	169.284	225.595	161.902	168.925	230.769
TKOv3_40300	NPEPPS	239.191	223.73	113.517	91.2033	70.8059	88.5265	69.951	96.087	118.491	188.285	242.269	192.838	98.7226	168.691
TKOv3_41510	OPN3	505.953	480.652	857.527	624.911	752.873	853.878	736.112	819.566	573.436	525.126	580.661	703.293	627.437	569.5
TKOv3_57120	SNX13	245.152	189.31	331.876	521.041	412.288	262.36	286.311	404.534	393.506	324.749	445.304	378.458	417.926	412.955
TKOv3_43734	PATL1	182.56	110.636	192.329	248.276	107.553	70.8212	105.74	145.342	201.873	172.739	166.744	130.965	201.833	157.894
TKOv3_45311	PI3	172.128	159.807	307.292	280.366	218.692	203.611	227.747	227.702	277.941	171.011	231.48	254.712	246.807	288.798
TKOv3_41696	OR11H6	245.152	208.979	425.148	350.457	250.958	304.209	305.019	235.777	200.41	228.015	223.633	238.212	250.097	253.711
TKOv3_25138	GPI	213.856	202.832	87.488	55.7353	61.8432	36.2154	87.032	71.056	93.6222	107.098	109.855	134.059	139.309	102.564
TKOv3_33442	LPGAT1	267.507	242.17	183.652	290.499	221.381	198.782	210.666	270.497	254.535	247.017	230.499	188.713	251.194	176.788
TKOv3_51983	RPL36	108.046	159.807	3.61521	0.844475	10.7553	8.04786	6.50707	0	0	0	9.80846	3.09366	2.19384	4.04857
TKOv3_50167	RBM10	169.148	126.617	40.4903	71.7804	60.9469	99.7935	75.6447	45.2174	99.4736	76.0051	52.9657	140.246	114.079	39.1362
TKOv3_56618	SMARCD1	163.932	218.813	15.1839	36.3124	95.9017	17.7053	30.0952	19.3789	76.0681	51.8217	77.4868	32.9991	87.7534	64.7772
TKOv3_51675	RNF41	313.706	313.468	143.885	163.828	179.256	139.228	229.374	147.764	217.964	260.836	262.867	265.024	291.78	242.914
TKOv3_61333	TIMM23	240.682	231.106	172.807	211.963	146.99	228.559	155.356	182.485	348.158	240.107	230.499	286.679	318.106	234.817
TKOv3_56866	SMTNL2	157.971	161.037	96.8875	114.849	139.819	108.646	85.4053	87.205	163.839	110.553	163.801	134.059	167.828	133.603
TKOv3_32461	LAPTM4B	167.657	196.686	207.513	149.472	180.152	253.508	234.254	254.348	177.005	174.466	193.227	185.62	178.798	179.487
TKOv3_44375	PDE1A	172.873	124.158	176.422	133.427	129.96	310.647	174.877	181.677	198.947	133.009	171.648	103.122	211.705	195.681
TKOv3_65463	UCKL1	185.541	195.457	164.13	167.206	224.069	119.108	142.342	138.075	146.285	179.648	141.242	157.777	176.604	116.059
TKOv3_01808	AJUBA	292.097	323.303	518.42	331.034	290.394	341.229	390.424	365.777	294.032	288.474	311.909	331.022	331.269	309.041
TKOv3_36122	MFSD4	130.4	141.368	88.211	124.982	217.795	134.399	126.888	90.4348	159.45	101.916	113.778	109.309	136.018	66.1267
TKOv3_49186	PYROXD2	150.519	179.476	26.7525	97.1146	99.4868	138.423	52.8699	97.7019	131.656	103.643	153.012	110.341	88.8503	117.409
TKOv3_57395	SOX17	141.577	175.788	146.054	201.83	133.545	90.136	156.983	199.441	118.491	257.381	195.188	152.621	149.181	148.448
TKOv3_29188	ILK	249.623	260.609	120.748	142.716	115.62	96.5743	86.2187	145.342	115.565	88.0968	85.3336	157.777	188.67	209.176
TKOv3_38227	MYL6	207.15	141.368	212.574	167.206	155.056	184.296	208.226	148.572	215.039	145.101	214.805	150.558	188.67	269.905
TKOv3_61227	THYN1	287.626	276.59	185.822	309.922	273.365	354.911	306.646	294.721	210.65	248.744	270.713	194.901	231.45	230.769
TKOv3_57544	SPAG9	136.361	115.553	95.4414	75.1583	59.1543	77.2595	122.821	52.4845	109.714	107.098	102.008	95.9035	95.4319	101.214
TKOv3_54493	SHANK1	245.152	224.96	267.525	206.052	281.431	271.213	292.818	258.385	266.238	262.563	236.384	364.021	371.855	275.303
TKOv3_64677	TTI1	147.539	143.827	58.5663	97.9591	27.7846	34.6058	42.2959	64.5963	59.9767	57.0038	51.004	30.9366	38.3921	26.9905
TKOv3_52670	S100A5	255.584	267.985	116.41	171.428	138.923	163.372	153.729	160.683	172.616	155.465	122.606	112.403	197.445	128.205
TKOv3_47342	PPP2R3C	160.206	199.145	125.086	157.917	137.13	140.838	76.4581	136.46	203.336	247.017	223.633	226.869	239.128	373.818
TKOv3_53707	SEMA6C	321.157	282.736	482.268	398.592	524.322	322.719	395.304	387.578	375.952	409.391	437.457	371.239	536.393	524.965
TKOv3_06930	C15orf27	225.034	204.062	274.033	364.813	165.811	98.1839	258.656	218.82	197.484	248.744	139.28	284.617	165.635	259.109
TKOv3_00473	AC106876.2	161.696	143.827	102.672	168.051	235.721	117.499	181.385	216.398	100.936	143.373	127.51	115.497	150.278	164.642
TKOv3_27035	HINT1	269.742	263.068	261.018	222.941	268.883	245.46	253.776	272.919	245.758	278.11	372.721	298.023	283.005	319.837
TKOv3_32819	LEPROTL1	348.728	389.684	346.337	299.789	383.607	424.122	321.287	541.802	374.489	424.938	390.377	459.924	451.93	303.643
TKOv3_08747	C9orf53	257.82	236.023	400.565	342.012	399.74	319.5	507.551	369.006	311.587	350.66	345.258	419.707	331.269	377.867
TKOv3_20530	FAM131A	177.344	212.667	174.976	103.026	53.7767	296.966	236.695	164.721	74.6052	196.922	140.261	235.118	88.8503	122.807
TKOv3_22062	FEZF2	118.478	135.222	133.763	130.894	213.314	131.985	148.036	90.4348	100.936	155.465	120.644	122.715	116.273	187.584
TKOv3_31308	KIF12	315.196	360.181	344.168	349.613	366.578	529.549	332.674	410.994	296.958	354.115	384.492	475.393	325.785	475.033
TKOv3_50180	RBM12B	244.407	202.832	409.964	282.055	294.875	333.986	396.118	348.013	267.701	366.206	252.077	201.088	288.489	241.565
TKOv3_21583	FBLN7	121.459	135.222	123.64	183.251	275.157	90.9408	95.9793	131.615	147.748	100.189	94.1612	116.528	115.176	105.263
TKOv3_32414	LAMP3	254.094	238.482	266.079	275.299	367.474	357.325	485.59	346.398	239.907	286.747	209.901	384.645	281.908	309.041
TKOv3_69677	ZNF564	249.623	243.399	383.212	283.744	243.787	435.389	361.956	445.715	228.204	286.747	256.001	237.181	199.639	284.75
TKOv3_52819	SAMD4B	204.17	197.915	93.9953	86.9809	128.168	144.057	160.237	145.342	95.0851	105.371	104.951	227.9	162.344	187.584
TKOv3_34709	MALL	371.082	361.411	148.223	210.274	192.7	122.327	163.49	150.186	279.404	295.383	297.196	248.524	197.445	279.352
TKOv3_37184	MRPL22	204.915	204.062	70.135	96.2701	77.0799	52.3111	44.7361	42.7951	121.416	105.371	128.491	128.903	112.983	117.409
TKOv3_61181	THRAP3	131.891	146.285	80.9806	115.693	119.205	69.2116	78.0848	109.814	114.102	172.739	165.763	178.401	104.207	117.409
TKOv3_05738	BHLHE40	520.111	550.721	522.759	611.4	496.538	672.801	684.056	508.696	424.226	450.848	506.116	589.858	572.591	506.072
TKOv3_51822	RP2	246.643	301.176	107.01	117.382	64.532	152.105	144.782	147.764	213.576	257.381	189.303	341.334	144.793	182.186
TKOv3_47942	PROP1	172.873	137.68	112.071	123.293	83.3538	168.2	57.7502	138.075	115.565	82.9147	98.0846	83.5289	66.912	133.603
TKOv3_50302	RBM5	102.085	90.9673	28.9216	87.8254	88.7315	70.0164	40.6692	109.006	81.9195	77.7325	42.1764	53.6235	39.489	62.0781
TKOv3_51449	RNF135	107.301	135.222	208.959	169.739	181.944	130.375	95.1659	88.8199	134.582	67.3682	158.897	86.6225	156.859	128.205
TKOv3_39524	NFE2L3	306.999	277.819	266.802	254.187	319.075	329.962	223.68	391.615	175.542	222.833	199.112	197.994	224.868	183.535
TKOv3_68284	ZER1	310.725	349.118	479.376	306.544	413.184	310.647	457.122	307.64	355.472	236.652	379.587	329.991	375.146	358.974
TKOv3_66982	WDR49	216.092	233.565	276.202	319.212	255.439	287.309	330.234	343.975	298.421	266.018	214.805	246.462	277.52	311.74
TKOv3_54986	SLC12A1	169.148	201.603	221.251	361.435	173.878	222.926	301.765	383.541	184.319	148.555	181.456	221.712	173.313	210.526
TKOv3_39146	NDUFAF5	149.774	137.68	40.4903	46.4461	64.532	84.5025	54.4967	76.7081	175.542	133.009	115.74	91.7786	151.375	117.409
TKOv3_47401	PPP4R4	196.718	162.266	237.881	299.789	221.381	278.456	256.216	168.758	261.85	193.468	272.675	186.651	252.291	248.313
TKOv3_66678	VTA1	222.798	295.029	185.099	217.875	128.168	230.169	206.599	172.795	270.627	205.559	224.614	202.119	164.538	188.933
TKOv3_38196	MYH9	75.2596	92.1966	33.9829	292.188	117.412	118.304	81.3384	175.218	92.1594	95.0064	87.2953	60.842	80.075	59.3791
TKOv3_44350	PDCL2	105.81	124.158	159.069	130.894	246.476	176.248	262.723	143.727	128.731	136.464	175.571	139.215	154.665	170.04
TKOv3_44882	PFKFB1	208.64	204.062	292.832	193.385	260.817	189.125	283.057	217.205	166.765	162.375	158.897	129.934	179.895	151.147
TKOv3_18843	EIF3K	173.619	162.266	151.839	305.7	233.032	229.364	156.17	233.354	194.559	203.832	193.227	364.021	322.494	309.041
TKOv3_58474	ST3GAL2	316.686	288.883	399.119	411.259	339.689	264.775	328.607	361.739	313.049	257.381	281.503	312.46	228.159	271.255
TKOv3_52155	RPS5	227.269	317.156	23.8604	16.045	11.6516	16.0957	42.2959	27.4534	5.85139	13.8191	22.5595	36.0927	29.6168	17.5438
TKOv3_47402	PPP4R4	215.347	186.852	198.113	237.297	218.692	300.99	239.948	189.752	255.998	184.831	230.499	209.338	299.459	190.283
TKOv3_40603	NRIP3	227.269	180.705	143.885	103.026	140.716	152.909	92.7257	225.28	150.673	219.378	202.054	113.434	139.309	148.448
TKOv3_29087	IL31	318.177	346.659	194.498	177.34	175.67	142.447	169.184	172.795	149.21	188.285	159.878	243.368	148.084	151.147
TKOv3_34804	MANF	362.14	472.047	268.971	255.876	256.335	289.723	250.522	279.379	267.701	304.02	385.472	336.178	332.366	402.158
TKOv3_12620	CLCF1	55.1407	62.6937	36.8751	7.60027	70.8059	74.0403	48.803	31.4907	200.41	98.4612	50.0231	49.4986	43.8767	31.0391
TKOv3_62880	TNFAIP8L3	72.279	51.6301	34.706	47.2906	139.819	53.1159	61.8172	33.9131	77.5309	60.4586	102.008	55.6859	62.5243	79.622
TKOv3_46375	PMVK	145.303	199.145	81.7036	124.138	99.4868	189.93	163.49	223.665	127.268	108.825	98.0846	95.9035	193.058	105.263
TKOv3_24433	GLDN	247.388	205.291	268.971	252.498	286.809	268.799	354.635	275.342	272.09	245.289	295.235	212.431	239.128	317.138
TKOv3_40608	NRK	125.184	161.037	137.378	54.0464	51.0878	70.8212	66.6975	53.292	57.0511	67.3682	54.9274	40.2176	63.6212	32.3886
TKOv3_25247	GPR128	259.31	226.189	336.214	353.835	269.78	257.532	210.666	300.373	286.718	260.836	306.024	358.865	348.82	441.295
TKOv3_02509	ANKEF1	266.016	264.297	276.925	282.899	414.08	477.238	295.258	390.808	378.877	376.571	360.951	371.239	385.018	403.508
TKOv3_68550	ZKSCAN3	324.138	313.468	386.827	378.325	417.665	393.54	351.382	319.752	421.3	471.577	472.768	529.016	397.084	620.781
TKOv3_28876	IL12RB2	218.327	234.794	245.111	265.165	201.662	152.105	244.828	139.69	222.353	188.285	208.92	151.589	210.608	280.701
TKOv3_46631	POLN	298.803	237.253	376.704	445.883	485.782	333.181	426.213	284.224	270.627	340.296	365.855	226.869	330.172	349.527
TKOv3_41185	NXPH2	421.006	319.615	500.344	494.862	736.74	507.015	729.605	594.286	352.546	466.395	390.377	608.42	357.595	483.13
TKOv3_58877	STPG1	162.441	183.164	73.0272	47.2906	76.1836	114.28	43.9227	53.292	117.028	98.4612	77.4868	92.8099	131.63	79.622
TKOv3_41656	OR10R2	187.031	181.935	216.912	217.03	272.468	214.878	267.603	187.329	212.113	279.837	147.127	220.681	152.472	205.128
TKOv3_53380	SDCCAG8	240.682	212.667	280.54	313.3	173.878	277.651	239.135	242.236	255.998	164.102	162.82	175.308	296.168	230.769
TKOv3_07125	C17orf105	139.342	129.075	60.0124	144.405	54.6729	87.7217	74.8313	41.9876	46.8111	74.2777	105.931	79.404	111.886	90.4182
TKOv3_14662	CSPG5	201.189	197.915	101.949	105.559	79.7687	26.5579	61.8172	126.77	134.582	145.101	149.089	188.713	145.89	160.593
TKOv3_16816	DIRC3	230.995	222.501	218.358	254.187	142.508	300.99	263.536	215.59	332.066	229.743	225.595	217.588	255.582	237.516
TKOv3_60472	TCP11L2	204.915	210.208	208.236	247.431	203.455	208.44	183.825	156.646	174.079	241.834	248.154	250.587	240.225	265.856
TKOv3_52240	RRAD	131.891	106.948	149.67	74.3138	261.713	152.909	97.606	153.416	43.8854	93.279	97.1037	117.559	120.661	70.1753
TKOv3_60385	TCF23	171.383	109.407	129.424	76.8472	148.782	114.28	120.381	110.621	172.616	145.101	164.782	248.524	128.339	205.128
TKOv3_45708	PKDCC	287.626	232.335	291.386	198.452	251.854	189.93	373.343	227.702	166.765	259.108	229.518	191.807	279.714	190.283
TKOv3_12197	CHMP2A	200.444	240.94	203.898	187.473	177.463	140.033	170.811	156.646	198.947	250.471	227.556	266.055	183.185	218.623
TKOv3_05078	B3GALT4	201.189	206.52	329.707	198.452	255.439	181.077	175.691	164.721	209.187	248.744	241.288	261.93	244.613	184.885
TKOv3_37721	MTFR2	140.832	151.202	255.957	166.362	188.218	225.34	287.124	228.509	134.582	141.646	176.552	172.214	153.568	168.691
TKOv3_47655	PRH2	504.463	571.619	349.952	379.169	387.192	390.321	440.041	329.441	614.396	361.024	387.434	354.74	518.842	344.129
TKOv3_62001	TMEM164	405.358	435.168	495.283	575.932	452.62	359.739	647.453	410.994	509.071	500.943	435.496	534.172	477.159	458.838
TKOv3_15031	CUL1	268.252	290.112	211.128	193.385	155.056	337.205	151.289	306.833	210.65	153.738	220.69	196.963	284.102	263.157
TKOv3_22585	FNBP1	256.33	210.208	187.268	210.274	257.232	249.484	222.054	265.652	222.353	234.925	195.188	311.429	243.516	213.225
TKOv3_00422	ABRA	167.657	197.915	165.576	174.806	231.24	176.248	139.902	138.882	163.839	333.386	204.016	186.651	209.511	205.128
TKOv3_24116	GGA3	201.189	208.979	185.822	105.559	110.242	107.841	205.786	239.814	122.879	103.643	99.0654	111.372	89.9473	114.71
TKOv3_44196	PCNA	285.39	256.921	39.0442	43.9127	66.3245	9.65743	61.8172	77.5156	32.1826	36.2752	37.2721	43.3113	27.4229	40.4857
TKOv3_62013	TMEM168	199.699	189.31	221.974	180.718	263.506	214.878	162.677	297.143	206.261	172.739	176.552	157.777	142.599	145.749
TKOv3_67745	YTHDC2	215.347	158.578	144.608	237.297	123.686	183.491	169.184	113.044	209.187	196.922	172.629	173.245	140.405	184.885
TKOv3_26541	HCAR2	220.563	247.087	292.832	321.745	257.232	299.38	303.392	274.534	225.279	247.017	210.882	219.65	261.066	199.73
TKOv3_29403	INSL5	106.556	67.6108	150.393	103.87	84.2501	89.3313	145.596	161.491	99.4736	88.0968	36.2913	106.216	152.472	67.4762
TKOv3_26932	HGSNAT	167.657	162.266	165.576	79.3806	232.136	124.742	104.113	200.249	185.782	179.648	128.491	169.12	134.921	116.059
TKOv3_25135	GPHN	187.031	207.75	284.878	154.539	293.979	185.101	131.768	145.342	210.65	198.65	195.188	172.214	198.542	144.399
TKOv3_09015	CACNG5	296.567	259.38	99.7797	103.87	66.3245	59.5542	172.437	81.5529	200.41	120.917	135.357	121.684	177.701	178.137
TKOv3_62948	TNFRSF25	250.368	231.106	203.898	190.851	302.942	263.97	287.124	239.006	188.707	302.293	136.338	239.243	218.287	141.7
TKOv3_05821	BLID	213.856	221.272	215.466	289.655	209.729	292.942	213.107	351.242	212.113	186.558	191.265	239.243	276.423	209.176
TKOv3_24274	GIPC2	210.131	218.813	159.069	118.226	114.724	120.718	158.61	165.528	190.17	153.738	146.146	181.495	155.762	199.73
TKOv3_07545	C1orf170	444.851	438.856	174.976	181.562	213.314	215.683	193.585	135.652	225.279	295.383	321.717	239.243	267.648	190.283
TKOv3_10822	CD3G	161.696	141.368	238.604	233.075	228.551	195.563	278.991	318.944	191.633	252.199	171.648	175.308	191.961	183.535
TKOv3_13878	COTL1	237.701	280.278	336.214	272.765	214.21	196.368	236.695	272.112	257.461	281.564	216.767	178.401	296.168	191.633
TKOv3_27500	HNRNPUL1	181.815	178.247	178.591	144.405	143.404	244.655	92.7257	144.534	141.896	214.196	134.376	184.589	128.339	128.205
TKOv3_62540	TMEM59	176.599	178.247	209.682	168.895	148.782	268.799	202.533	132.422	236.981	240.107	141.242	168.089	208.414	186.234
TKOv3_55041	SLC13A5	357.669	345.43	246.557	258.409	320.867	290.528	401.811	419.876	431.54	323.022	435.496	397.02	359.789	288.798
TKOv3_68826	ZNF2	128.165	162.266	128.701	204.363	187.322	221.316	233.441	235.777	166.765	179.648	201.073	164.995	179.895	218.623
TKOv3_29717	IRX2	233.975	238.482	217.635	179.029	235.721	268.799	206.599	178.447	275.015	219.378	223.633	251.618	227.062	203.778
TKOv3_05438	BCAR3	285.39	307.322	279.094	328.501	258.128	277.651	275.737	327.826	311.587	291.929	278.56	221.712	291.78	275.303
TKOv3_58904	STRAP	162.441	151.202	43.3825	16.8895	25.992	20.9244	21.148	17.764	78.9938	91.5516	104.951	42.2801	28.5199	25.641
TKOv3_66933	WDR35	191.502	173.33	201.005	196.763	188.218	210.854	204.159	222.05	190.17	252.199	215.786	233.056	213.899	199.73
TKOv3_15967	DCTD	241.427	233.565	365.136	271.921	299.357	309.038	323.727	188.944	403.746	376.571	254.039	476.424	458.512	418.353
TKOv3_55248	SLC22A14	132.636	135.222	103.395	99.648	152.367	28.9723	153.729	108.199	112.639	117.462	136.338	158.808	111.886	124.156
TKOv3_24488	GLIS3	300.293	314.698	245.834	263.476	420.354	377.445	388.797	461.056	462.26	364.479	386.453	369.177	364.177	364.372
TKOv3_42893	ORMDL1	260.055	264.297	453.347	334.412	452.62	267.994	448.988	522.423	305.735	312.657	319.756	356.802	343.335	390.013
TKOv3_40895	NUCKS1	245.898	252.004	245.834	217.03	220.484	285.699	253.776	221.242	196.022	200.377	203.035	187.682	205.124	245.614
TKOv3_29831	ITGA11	138.597	161.037	208.959	233.92	268.883	214.878	156.983	217.205	141.896	198.65	296.215	219.65	161.247	171.39
TKOv3_54059	SETD2	174.364	211.438	75.9193	87.8254	48.399	64.3829	87.8454	75.0932	175.542	229.743	170.667	163.964	134.921	143.05
TKOv3_58866	STOX1	184.796	168.412	152.562	304.855	171.189	157.738	258.656	316.522	210.65	191.74	206.958	167.058	273.133	222.672
TKOv3_55174	SLC18B1	192.247	242.17	182.206	262.632	282.327	160.957	206.599	243.851	232.593	134.736	190.284	130.965	195.251	161.943
TKOv3_53911	SERPINA9	244.407	271.673	353.567	270.232	298.46	436.194	367.649	433.603	485.665	404.209	272.675	323.803	500.195	365.721
TKOv3_62528	TMEM55B	257.82	248.316	245.111	213.652	161.33	298.576	147.222	201.056	235.518	264.29	227.556	284.617	221.577	206.477
TKOv3_60503	TCTN2	252.604	283.965	159.792	135.96	137.13	230.974	156.983	170.373	150.673	101.916	138.299	174.276	159.053	201.079
TKOv3_47718	PRKAG2	277.939	222.501	167.022	208.585	225.862	210.049	207.413	214.783	223.816	257.381	197.15	241.306	225.965	214.574
TKOv3_32090	KRT24	239.191	231.106	182.929	129.205	140.716	163.372	122.821	111.429	313.049	302.293	220.69	299.054	326.882	248.313
TKOv3_07581	C1orf192	199.699	224.96	177.868	212.808	187.322	156.933	155.356	213.168	136.045	157.192	163.801	153.652	155.762	168.691
TKOv3_51941	RPL22	274.958	263.068	363.69	204.363	208.833	251.898	225.307	352.05	295.495	229.743	290.33	234.087	343.335	325.236
TKOv3_02890	ANXA5	210.131	243.399	372.366	360.591	302.046	326.743	200.906	371.429	264.775	219.378	247.173	232.025	370.758	225.371
TKOv3_58850	STOML1	351.708	271.673	275.479	369.88	350.445	272.018	367.649	276.149	285.255	376.571	269.733	250.587	246.807	344.129
TKOv3_07873	C22orf29	284.645	252.004	359.351	396.903	327.141	491.724	357.075	283.416	234.056	409.391	257.962	364.021	325.785	213.225
TKOv3_17424	DNTTIP1	139.342	186.852	29.6447	73.4693	106.657	12.8766	51.2432	30.6833	188.707	117.462	108.874	85.5913	75.6873	91.7677
TKOv3_45529	PIK3R4	341.276	306.093	490.222	718.648	691.03	432.17	496.164	478.82	463.723	418.028	369.779	473.33	530.908	390.013
TKOv3_65844	UROC1	228.759	216.355	195.221	369.88	218.692	354.911	167.557	237.391	204.799	188.285	203.035	314.522	417.926	365.721
TKOv3_12903	CLIP2	290.606	207.75	244.388	287.966	209.729	173.834	128.515	233.354	198.947	164.102	227.556	181.495	138.212	199.73
TKOv3_17853	DSTYK	259.31	302.405	292.109	230.542	256.335	351.692	277.364	343.168	257.461	317.84	323.679	239.243	182.088	296.895
TKOv3_67680	YIPF4	264.526	283.965	141.716	212.808	213.314	194.758	233.441	199.441	314.512	309.203	293.273	296.992	213.899	272.604
TKOv3_03629	ARHGEF17	257.82	335.596	338.383	293.877	228.551	121.523	226.934	185.714	253.073	229.743	178.514	180.464	159.053	197.031
TKOv3_68296	ZFAND2B	76.7499	98.343	188.714	116.538	211.521	153.714	161.05	98.5094	174.079	117.462	149.089	173.245	140.405	114.71
TKOv3_61349	TIMM8B	143.813	136.451	80.2576	107.248	70.8059	55.5302	128.515	84.7827	106.788	150.283	99.0654	98.9972	116.273	113.36
TKOv3_10530	CCR10	239.191	252.004	70.135	124.138	155.056	83.6978	154.543	196.211	108.251	160.647	185.38	147.465	199.639	175.438
TKOv3_26761	HELLS	152.755	147.515	52.782	148.628	174.774	138.423	128.515	214.783	108.251	176.194	144.184	147.465	156.859	90.4182
TKOv3_09642	CBR4	144.558	126.617	194.498	141.872	255.439	174.639	167.557	209.938	67.291	95.0064	77.4868	114.466	125.049	78.2724
TKOv3_58124	SRC	268.252	286.424	245.834	314.989	241.995	268.799	345.688	322.982	355.472	359.297	402.147	362.99	297.265	310.391
TKOv3_53356	SDC2	309.235	282.736	409.964	502.463	351.341	399.979	372.53	347.205	500.294	469.85	426.668	480.549	636.212	364.372
TKOv3_60274	TBX5	192.992	167.183	148.223	129.205	129.064	107.841	122.008	196.211	165.302	139.918	115.74	144.371	141.502	147.098
TKOv3_15594	CYTIP	410.574	291.341	336.937	330.19	362.992	416.074	385.544	402.112	387.655	331.659	354.085	349.584	393.794	317.138
TKOv3_28485	IFIT2	155.735	140.139	216.189	271.076	216.899	155.324	248.895	240.621	137.508	148.555	203.035	169.12	175.507	170.04
TKOv3_02584	ANKRD16	268.997	243.399	224.866	257.565	224.966	354.911	270.043	283.416	238.444	226.288	315.832	282.554	232.547	295.546
TKOv3_44827	PEX2	251.114	283.965	353.567	303.166	323.556	293.747	331.861	406.149	313.049	345.478	273.656	278.43	263.26	265.856
TKOv3_12342	CHRNB2	255.584	213.896	350.675	239.831	258.128	328.353	305.832	306.833	147.748	247.017	240.307	242.337	228.159	219.973
TKOv3_18890	EIF4EBP2	245.898	167.183	154.008	94.5812	103.072	164.981	128.515	150.186	90.6965	122.645	58.8507	172.214	91.0442	90.4182
TKOv3_02209	ALPK2	207.15	190.54	256.68	213.652	261.713	202.806	209.853	214.783	226.741	217.651	284.445	244.399	122.855	186.234
TKOv3_14607	CSN2	213.111	188.081	267.525	273.61	239.306	276.042	383.104	251.118	392.043	340.296	351.143	270.18	303.846	242.914
TKOv3_02352	AMOTL2	149.774	135.222	153.285	106.404	172.085	139.228	153.729	206.708	117.028	98.4612	141.242	156.746	227.062	148.448
TKOv3_50770	RFX2	159.461	168.412	197.39	309.078	223.173	207.635	146.409	189.752	175.542	172.739	307.005	256.774	191.961	251.012
TKOv3_52153	RPS4Y2	152.009	162.266	242.942	250.809	189.115	276.846	172.437	147.764	253.073	202.104	217.748	203.15	227.062	153.846
TKOv3_48584	PSRC1	360.65	445.002	203.898	343.701	285.016	295.357	379.85	398.882	311.587	283.292	251.097	291.835	327.978	295.546
TKOv3_18213	E2F8	131.145	126.617	223.42	258.409	275.157	213.268	181.385	318.944	257.461	228.015	254.039	184.589	188.67	233.468
TKOv3_15599	CYYR1	114.752	115.553	180.76	131.738	167.604	214.073	274.11	127.578	124.342	238.38	124.567	284.617	220.48	224.021
TKOv3_62628	TMEM86B	190.012	165.954	122.194	79.3806	161.33	241.436	194.399	139.69	184.319	158.92	123.587	134.059	212.802	134.952
TKOv3_49713	RAE1	270.487	309.781	11.5687	43.9127	23.3032	24.1436	0	22.6087	5.85139	5.18217	8.82761	10.3122	55.9428	14.8448
TKOv3_10554	CCR7	251.114	261.838	158.346	190.851	186.426	280.87	241.575	191.367	187.244	196.922	223.633	201.088	134.921	237.516
TKOv3_39145	NDUFAF5	184.051	186.852	77.3654	146.939	171.189	136.009	73.2045	83.1678	188.707	214.196	155.954	130.965	194.154	106.612
TKOv3_16367	DEFB134	248.133	222.501	273.31	171.428	305.631	300.99	243.202	354.472	273.552	352.387	251.097	408.363	322.494	287.449
TKOv3_57998	SPRR3	268.252	292.571	309.462	460.239	369.266	498.967	429.467	426.336	433.003	335.113	386.453	290.804	440.961	354.925
TKOv3_64368	TSPAN2	228.014	184.393	108.456	127.516	270.676	195.563	227.747	198.634	317.438	205.559	201.073	194.901	179.895	213.225
TKOv3_65902	USP12	123.694	146.285	113.517	106.404	95.9017	120.718	128.515	150.186	155.062	160.647	107.893	144.371	91.0442	116.059
TKOv3_54531	SHCBP1	230.25	179.476	334.045	293.877	281.431	272.018	206.599	310.87	191.633	155.465	204.016	150.558	148.084	264.507
TKOv3_60144	TBCA	127.42	175.788	46.2746	36.3124	9.85905	47.4824	5.69369	16.1491	29.2569	5.18217	10.7893	10.3122	9.87226	12.1457
TKOv3_13172	CNBD2	99.1042	136.451	160.515	191.696	136.234	111.06	155.356	159.876	141.896	167.557	161.84	106.216	172.216	116.059
TKOv3_05423	BCAN	198.208	231.106	146.054	128.36	167.604	86.9169	117.127	157.454	140.433	120.917	92.1995	80.4352	99.8195	110.661
TKOv3_13207	CNGA4	418.026	419.187	373.089	354.679	435.591	284.09	366.023	299.565	370.1	352.387	350.162	454.768	366.371	364.372
TKOv3_60868	TFCP2L1	149.029	93.4259	135.932	141.872	192.7	100.598	158.61	139.69	115.565	176.194	164.782	214.494	132.727	153.846
TKOv3_49199	PZP	210.131	179.476	292.109	188.318	200.766	209.244	205.786	314.907	157.988	215.924	179.495	199.026	188.67	252.361
TKOv3_32772	LEMD3	133.381	138.91	158.346	248.276	126.375	247.874	295.258	201.056	141.896	162.375	176.552	204.182	157.956	172.739
TKOv3_02523	ANKHD1	169.893	167.183	325.368	255.031	292.186	238.217	305.832	273.727	258.924	385.208	252.077	349.584	312.622	279.352
TKOv3_46585	POLDIP3	169.893	178.247	113.517	185.784	86.0426	132.79	134.208	170.373	311.587	157.192	290.33	162.933	265.454	376.517
TKOv3_13613	COL4A6	111.026	113.094	96.8875	27.0232	69.9096	47.4824	47.1762	37.9503	121.416	58.7312	74.5443	94.8723	54.8459	91.7677
TKOv3_60734	TET3	266.762	292.571	185.822	243.209	224.966	255.922	247.269	203.478	261.85	297.111	250.116	234.087	334.56	313.09
TKOv3_33606	LRP2	214.602	162.266	214.02	308.233	291.29	275.237	339.994	252.733	238.444	234.925	142.223	166.027	179.895	174.089
TKOv3_67612	YAF2	274.213	279.048	194.498	127.516	199.87	234.998	178.944	141.304	223.816	288.474	204.016	181.495	187.573	202.429
TKOv3_18551	EFNA2	187.031	142.597	163.407	252.498	156.849	202.806	193.585	273.727	106.788	177.921	175.571	266.055	234.74	233.468
TKOv3_64239	TSC22D3	210.131	227.418	300.785	291.344	286.809	265.579	313.153	327.826	288.181	333.386	222.652	308.335	372.952	269.905
TKOv3_56528	SLU7	131.145	90.9673	89.6571	85.292	120.101	65.1877	51.2432	129.193	127.268	108.825	96.1229	65.9981	70.2027	33.7381
TKOv3_54579	SHISA7	162.441	146.285	184.375	200.141	182.841	170.615	169.997	109.006	181.393	114.008	216.767	221.712	230.353	159.244
TKOv3_10687	CD2	345.002	283.965	639.168	469.528	560.173	490.115	816.637	482.857	405.209	421.483	528.676	422.801	501.291	546.558
TKOv3_22384	FKBP2	165.422	226.189	144.608	179.873	180.152	128.766	237.508	122.733	220.89	160.647	143.203	151.589	180.991	153.846
TKOv3_34095	LTB4R2	156.48	181.935	95.4414	52.3574	43.9176	72.4308	85.4053	71.8634	89.2337	86.3694	134.376	146.433	131.63	98.5153
TKOv3_46733	POLR3G	320.412	288.883	478.653	313.3	372.851	455.509	485.59	530.497	222.353	252.199	230.499	298.023	278.617	263.157
TKOv3_08295	C5orf48	413.555	421.646	252.341	349.613	368.37	241.436	306.646	272.112	386.192	388.662	410.974	368.146	326.882	317.138
TKOv3_08145	C3orf84	197.463	207.75	140.27	131.738	164.019	113.475	145.596	230.124	106.788	93.279	137.318	103.122	119.564	116.059
TKOv3_22812	FOXO3	159.461	147.515	58.5663	43.0682	89.6278	64.3829	108.18	66.2112	181.393	153.738	115.74	137.152	103.11	68.8258
TKOv3_51337	RNASEH1	228.014	276.59	9.39953	22.8008	17.0293	20.9244	5.69369	28.2609	127.268	112.28	104.951	100.028	89.9473	110.661
TKOv3_05900	BMP2K	211.621	220.043	266.802	317.523	286.809	239.021	222.867	329.441	222.353	286.747	278.56	350.615	266.551	249.662
TKOv3_34624	MAGEB5	125.184	121.699	160.515	293.877	250.958	218.097	327.794	364.969	222.353	179.648	162.82	169.12	179.895	183.535
TKOv3_54713	SIGLECL1	202.679	233.565	168.469	217.03	204.351	207.635	371.716	226.087	251.61	307.475	224.614	333.084	232.547	280.701
TKOv3_67515	XPNPEP1	192.992	197.915	186.545	207.741	230.343	189.93	159.423	163.106	138.971	146.828	164.782	219.65	186.476	124.156
TKOv3_38420	MYPOP	322.647	291.341	397.673	329.345	314.593	378.249	422.959	320.559	311.587	359.297	277.579	358.865	432.186	400.809
TKOv3_46919	PPAN	410.574	454.837	296.447	267.699	361.2	461.142	369.276	304.41	409.597	357.569	463.94	390.833	399.278	418.353
TKOv3_61625	TMA7	234.72	228.648	310.185	281.21	317.282	254.312	192.772	212.36	193.096	236.652	281.503	256.774	238.031	184.885
TKOv3_14859	CTNNA1	83.4562	131.534	90.3801	88.6699	49.2953	74.0403	70.7644	54.9069	103.862	72.5503	115.74	54.6547	114.079	112.011
TKOv3_26183	GUCD1	155.735	142.597	214.02	168.895	221.381	212.464	141.529	138.075	163.839	174.466	184.399	178.401	155.762	164.642
TKOv3_46158	PLEKHS1	345.002	279.048	302.954	332.723	411.391	292.942	329.42	274.534	275.015	290.201	255.02	288.742	235.837	260.458
TKOv3_24192	GHSR	198.954	177.017	192.329	213.652	153.263	148.081	229.374	130.808	163.839	252.199	245.211	208.307	185.379	323.886
TKOv3_45981	PLCL2	301.038	234.794	407.795	202.674	239.306	374.226	322.1	317.329	435.929	293.656	321.717	307.304	276.423	315.789
TKOv3_62989	TNFSF15	221.308	247.087	198.113	309.922	232.136	145.666	226.121	171.988	254.535	236.652	225.595	220.681	239.128	217.274
TKOv3_33682	LRRC17	278.684	250.775	319.584	285.433	441.865	332.377	388.797	453.789	320.364	310.93	330.545	290.804	420.12	357.624
TKOv3_14749	CSTF1	371.827	462.212	109.179	140.183	94.1091	94.16	78.0848	132.422	196.022	221.106	252.077	194.901	219.384	229.419
TKOv3_06285	BTBD19	88.6722	111.865	51.3359	12.6671	86.0426	52.3111	86.2187	88.8199	143.359	62.186	82.391	46.4049	82.2688	112.011
TKOv3_33519	LRCH3	201.189	192.998	235.711	121.604	206.144	244.655	182.198	155.031	181.393	188.285	170.667	186.651	281.908	164.642
TKOv3_17685	DPYD	157.971	158.578	149.67	206.896	234.825	222.926	236.695	255.155	295.495	240.107	233.441	186.651	208.414	211.875
TKOv3_38165	MYH15	116.243	115.553	46.9977	117.382	99.4868	71.626	93.5391	54.9069	98.0108	103.643	106.912	170.151	107.498	141.7
TKOv3_20383	FAM105A	239.191	233.565	362.244	363.124	388.088	302.6	254.589	241.429	261.85	291.929	258.943	308.335	272.036	244.264
TKOv3_21869	FCAR	293.587	222.501	291.386	319.212	355.822	343.644	283.057	424.721	380.34	226.288	288.369	268.117	284.102	251.012
TKOv3_39616	NGDN	134.871	157.349	48.4438	18.5784	24.1995	13.6814	17.0811	21.8013	20.4799	15.5465	42.1764	29.9054	34.0045	48.5829
TKOv3_22191	FGF9	269.742	240.94	262.464	277.832	244.684	254.312	345.688	387.578	329.141	314.385	278.56	277.398	231.45	234.817
TKOv3_56172	SLC5A7	181.815	145.056	216.912	183.251	211.521	185.906	226.934	260	152.136	209.014	152.031	238.212	214.996	233.468
TKOv3_46042	PLEKHA3	143.813	130.305	132.317	146.939	104.864	169.81	143.156	205.901	78.9938	127.827	100.046	112.403	97.6257	95.8163
TKOv3_33083	LIN28A	187.031	199.145	101.949	71.7804	104.864	131.985	165.117	78.323	95.0851	122.645	136.338	139.215	184.282	130.904
TKOv3_51886	RPGRIP1L	179.58	159.807	204.621	254.187	196.285	214.878	184.638	239.814	204.799	126.099	185.38	190.776	161.247	229.419
TKOv3_45008	PGLYRP4	286.135	263.068	227.758	238.986	184.633	197.977	214.733	222.857	231.13	200.377	269.733	164.995	202.93	246.963
TKOv3_31085	KIAA1024	219.072	255.692	439.609	317.523	281.431	368.592	479.083	365.777	323.289	348.933	242.269	298.023	301.652	224.021
TKOv3_41194	NXPH4	223.543	338.054	148.223	59.1132	88.7315	90.9408	108.18	92.8572	182.856	136.464	153.012	117.559	219.384	124.156
TKOv3_51111	RIC8B	298.058	264.297	184.375	178.184	231.24	307.428	252.962	286.646	232.593	202.104	179.495	194.901	188.67	186.234
TKOv3_68752	ZNF157	162.441	159.807	318.861	182.407	207.04	253.508	277.364	191.367	215.039	279.837	207.939	238.212	187.573	225.371
TKOv3_20729	FAM173A	196.718	169.642	122.917	97.1146	155.952	146.471	82.1517	110.621	125.805	145.101	135.357	92.8099	128.339	164.642
TKOv3_68476	ZFYVE28	383.749	489.257	479.376	485.573	615.743	412.855	495.351	547.454	503.22	513.034	425.687	531.079	612.08	647.772
TKOv3_41422	OLFML1	180.325	149.973	185.822	112.315	146.99	174.639	129.328	149.379	182.856	183.103	197.15	236.15	247.903	194.332
TKOv3_15511	CYP4F12	118.478	132.763	70.858	94.5812	107.553	104.622	110.62	136.46	128.731	86.3694	129.472	106.216	154.665	85.0201
TKOv3_33795	LRRC46	230.25	258.15	140.993	124.138	120.101	117.499	143.156	159.876	241.37	188.285	202.054	189.745	225.965	151.147
TKOv3_36569	MMADHC	225.779	236.023	254.51	243.209	194.492	168.2	178.944	182.485	234.056	188.285	168.705	145.402	252.291	229.419
TKOv3_34003	LSG1	246.643	295.029	108.456	70.9359	114.724	115.084	105.74	109.814	121.416	105.371	164.782	106.216	57.0397	197.031
TKOv3_65400	UBTD1	239.936	256.921	256.68	154.539	208.833	271.213	187.078	260.808	157.988	291.929	318.775	306.273	195.251	280.701
TKOv3_04849	ATP8B3	243.662	190.54	140.27	151.161	149.678	234.998	165.93	207.516	143.359	110.553	167.725	145.402	146.987	170.04
TKOv3_30081	JAGN1	284.645	367.557	451.178	201.83	383.607	321.914	476.643	458.634	342.306	399.027	377.626	471.268	423.41	431.848
TKOv3_41195	NXT1	114.007	127.846	12.2917	25.3342	28.6809	14.4862	8.94722	20.1863	8.77708	10.3643	8.82761	14.4371	8.77534	2.69905
TKOv3_08929	CACNA1B	323.393	330.678	386.104	303.166	311.008	283.285	414.826	393.23	337.918	390.39	435.496	311.429	295.071	383.265
TKOv3_08313	C5orf55	122.949	188.081	148.223	103.87	85.1464	123.132	171.624	121.118	114.102	81.1873	95.142	118.59	68.0089	94.4667
TKOv3_57335	SOS1	385.985	499.091	233.542	276.143	305.631	223.731	379.037	266.46	308.661	266.018	281.503	331.022	347.723	228.07
TKOv3_40735	NSUN7	293.587	234.794	333.322	321.745	343.274	274.432	356.262	410.994	267.701	259.108	245.211	283.586	266.551	230.769
TKOv3_44326	PDCD4	354.689	347.888	352.121	302.322	250.958	287.309	417.266	329.441	370.1	449.121	451.189	423.832	365.274	485.829
TKOv3_51816	RP1	320.412	360.181	332.599	271.076	281.431	259.946	310.713	364.969	310.124	361.024	273.656	308.335	288.489	309.041
TKOv3_15075	CUX2	149.774	169.642	107.733	135.96	106.657	202.001	143.969	136.46	77.5309	120.917	136.338	119.622	133.824	101.214
TKOv3_32145	KRT38	210.876	224.96	343.445	193.385	195.389	306.624	187.892	203.478	222.353	236.652	181.456	222.744	283.005	155.195
TKOv3_09153	CALU	181.07	175.788	208.959	217.03	134.442	318.695	265.163	204.286	272.09	176.194	132.414	210.369	136.018	151.147
TKOv3_47399	PPP4R2	286.881	331.908	353.567	339.479	368.37	274.432	353.822	234.969	373.026	255.654	307.986	226.869	306.04	292.847
TKOv3_55671	SLC2A9	149.774	135.222	90.3801	127.516	165.811	230.974	195.212	306.025	70.2167	203.832	145.165	140.246	85.5596	187.584
TKOv3_18818	EIF3E	117.733	195.457	18.7991	51.513	13.4442	43.4585	7.32045	54.9069	33.6455	22.4561	29.4254	48.4674	57.0397	53.981
TKOv3_11903	CES2	255.584	221.272	145.331	108.937	80.665	157.738	53.6833	184.1	209.187	186.558	237.365	207.275	107.498	164.642
TKOv3_65966	USP29	406.104	345.43	435.994	516.819	485.782	535.183	479.083	525.653	421.3	407.664	349.181	368.146	420.12	443.994
TKOv3_21293	FAM78A	289.116	249.545	221.251	168.895	225.862	196.368	176.504	167.95	226.741	355.842	256.982	263.993	202.93	219.973
TKOv3_07176	C17orf70	233.23	232.335	282.709	124.138	198.077	197.977	157.796	208.323	206.261	196.922	300.139	219.65	152.472	255.06
TKOv3_00859	ACTL8	271.978	335.596	355.736	277.832	417.665	303.404	430.28	339.938	397.895	350.66	285.426	368.146	459.609	354.925
TKOv3_16792	DIP2C	278.684	299.946	339.106	375.791	269.78	272.823	222.054	189.752	286.718	402.482	274.637	392.895	453.027	273.954
TKOv3_19941	ETV1	187.031	206.52	158.346	176.495	212.418	111.865	173.251	171.18	201.873	316.112	178.514	191.807	179.895	203.778
TKOv3_03179	APOBEC1	132.636	132.763	46.2746	46.4461	43.0213	41.0441	48.803	71.8634	62.9024	39.7299	70.6209	31.9678	59.2336	68.8258
TKOv3_05797	BIRC6	181.815	229.877	197.39	97.9591	146.99	143.252	147.222	110.621	175.542	181.376	181.456	154.683	143.696	130.904
TKOv3_05155	B4GALNT3	319.667	319.615	173.53	271.921	259.024	242.241	295.258	215.59	235.518	217.651	325.641	253.68	255.582	253.711
TKOv3_16876	DLC1	90.9076	76.2158	164.853	64.1801	121.894	81.2834	184.638	159.068	111.176	162.375	84.3527	145.402	92.1411	87.7191
TKOv3_19765	ERLIN2	295.822	265.526	284.878	425.615	282.327	494.943	370.09	310.87	295.495	383.48	344.277	304.21	269.842	298.245
TKOv3_17743	DRD3	157.225	200.374	114.24	176.495	105.761	263.165	129.328	54.0994	144.822	172.739	90.2378	172.214	195.251	205.128
TKOv3_66260	VAV2	282.41	200.374	223.42	254.187	221.381	304.209	194.399	323.789	206.261	205.559	276.599	244.399	437.67	283.4
TKOv3_07645	C1orf27	241.427	207.75	252.341	271.921	312.801	218.902	266.79	229.317	220.89	177.921	289.35	239.243	201.833	255.06
TKOv3_41609	OR10H1	73.0241	45.4837	65.0737	89.5143	81.5613	87.7217	48.803	60.559	68.7538	86.3694	51.9848	59.8108	50.4582	33.7381
TKOv3_65006	TYK2	243.662	194.227	274.033	178.184	277.846	316.281	343.248	297.143	206.261	224.561	159.878	278.43	264.357	259.109
TKOv3_41211	NYNRIN	116.988	104.489	163.407	133.427	138.027	144.862	148.036	213.975	175.542	160.647	117.701	199.026	191.961	143.05
TKOv3_07078	C16orf89	359.16	393.372	340.552	290.499	325.349	201.197	273.297	265.652	277.941	369.661	393.319	319.678	239.128	426.45
TKOv3_26958	HHIPL2	170.638	172.1	184.375	195.074	230.343	383.883	344.061	268.882	220.89	228.015	189.303	192.838	202.93	197.031
TKOv3_34079	LTA	131.891	104.489	93.2723	86.1364	62.7394	94.16	109.807	117.081	152.136	124.372	109.855	70.123	162.344	109.312
TKOv3_48853	PTPN18	313.706	352.806	419.364	306.544	340.585	567.374	339.994	402.112	329.141	424.938	340.353	293.898	278.617	282.051
TKOv3_68776	ZNF174	171.383	142.597	119.302	84.4475	167.604	119.913	65.0707	130	194.559	131.282	165.763	109.309	110.789	171.39
TKOv3_37668	MTCH1	222.053	221.272	120.025	134.272	91.4203	106.232	100.86	67.0187	65.8281	107.098	62.7741	84.5601	41.6829	67.4762
TKOv3_48259	PRSS53	194.483	223.73	49.1668	79.3806	120.101	49.8967	131.768	105.776	138.971	221.106	186.361	182.526	127.242	165.992
TKOv3_19892	ESYT3	125.929	120.47	212.574	127.516	93.2129	161.762	166.744	177.64	64.3653	127.827	112.797	83.5289	117.37	159.244
TKOv3_26945	HHEX	166.167	172.1	173.53	170.584	261.713	93.3552	135.835	160.683	143.359	193.468	124.567	174.276	186.476	145.749
TKOv3_64621	TTC39B	55.8858	56.5472	135.209	140.183	75.2873	181.077	131.768	109.814	27.7941	81.1873	39.2338	55.6859	39.489	64.7772
TKOv3_07405	C1QC	292.842	303.634	201.005	235.608	199.87	115.084	200.906	184.907	220.89	229.743	313.871	176.339	198.542	229.419
TKOv3_47084	PPL	305.509	259.38	286.324	342.857	263.506	371.811	251.336	150.186	217.964	298.838	195.188	320.71	274.229	183.535
TKOv3_02043	ALDH3B2	219.072	189.31	203.898	183.251	112.035	214.878	174.064	173.603	191.633	196.922	153.012	157.777	189.767	148.448
TKOv3_03556	ARHGAP39	356.179	342.971	307.292	280.366	205.248	240.631	177.318	262.423	371.563	323.022	316.813	244.399	288.489	331.983
TKOv3_53150	SCGN	174.364	153.661	236.434	180.718	196.285	226.145	144.782	132.422	115.565	210.741	163.801	215.525	129.436	165.992
TKOv3_30720	KCNV1	286.881	270.443	380.32	353.835	368.37	248.679	229.374	299.565	349.621	241.834	286.407	195.932	262.163	246.963
TKOv3_38263	MYLPF	251.114	199.145	305.846	296.411	272.468	235.802	277.364	228.509	285.255	397.299	348.2	482.611	270.939	278.002
TKOv3_20316	FADS2	264.526	287.653	315.969	311.611	276.053	226.95	249.709	273.727	340.843	266.018	298.177	265.024	234.74	268.555
TKOv3_08598	C8orf46	91.6527	84.8209	70.135	78.5362	66.3245	49.8967	78.8982	52.4845	108.251	120.917	149.089	134.059	98.7226	89.0686
TKOv3_13673	COLCA2	107.301	119.241	78.8115	104.715	149.678	78.869	80.525	77.5156	127.268	141.646	115.74	100.028	149.181	187.584
TKOv3_11168	CDH15	143.813	115.553	39.7673	88.6699	88.7315	82.893	63.4439	138.075	45.3483	57.0038	102.008	116.528	96.5288	63.4277
TKOv3_66750	VWDE	139.342	125.387	213.297	134.272	180.152	193.149	112.247	121.926	144.822	171.011	149.089	187.682	208.414	159.244
TKOv3_05936	BMPR1B	239.936	242.17	414.303	400.281	337	434.585	291.191	397.267	324.752	269.473	275.618	298.023	437.67	313.09
TKOv3_55399	SLC25A20	383.004	313.468	430.932	461.083	423.939	496.553	481.523	507.081	427.151	364.479	489.442	351.646	381.727	591.092
TKOv3_25210	GPR114	119.968	121.699	174.253	87.8254	129.96	183.491	85.4053	112.236	57.0511	98.4612	67.6784	134.059	157.956	56.68
TKOv3_31501	KIRREL	254.094	181.935	296.447	244.053	333.415	277.651	331.047	269.69	283.792	380.026	186.361	302.148	369.661	236.167
TKOv3_19457	EPC1	194.483	218.813	193.775	166.362	159.537	111.06	52.0565	121.926	147.748	209.014	174.591	160.87	202.93	211.875
TKOv3_12433	CHSY3	212.366	264.297	140.993	223.786	98.5905	152.105	198.466	159.876	162.376	129.554	160.859	130.965	190.864	175.438
TKOv3_14851	CTIF	239.936	304.863	175.699	240.675	216.899	313.062	219.614	214.783	288.181	307.475	304.062	356.802	323.591	322.536
TKOv3_61682	TMCO1	172.873	142.597	133.763	148.628	178.359	224.535	147.222	83.1678	157.988	134.736	103.97	87.6538	128.339	112.011
TKOv3_23488	GALE	233.23	224.96	139.547	206.052	112.931	235.802	126.888	239.814	190.17	184.831	124.567	176.339	219.384	122.807
TKOv3_56453	SLFN14	140.087	108.177	69.4119	122.449	157.745	138.423	222.054	197.826	100.936	152.01	109.855	170.151	152.472	118.758
TKOv3_22311	FIG4	423.987	357.723	369.474	413.793	286.809	509.43	428.653	394.845	441.78	487.124	416.859	393.926	395.987	495.276
TKOv3_23343	GABBR2	112.517	100.802	164.853	131.738	125.479	134.399	270.043	234.162	89.2337	114.008	142.223	110.341	92.1411	102.564
TKOv3_60249	TBX2	190.012	136.451	150.393	162.984	161.33	148.885	216.36	251.926	204.799	228.015	193.227	202.119	198.542	192.982
TKOv3_59297	SVOPL	228.759	200.374	193.775	225.475	212.418	197.173	148.036	290.683	231.13	196.922	179.495	229.962	324.688	251.012
TKOv3_69356	ZNF436	114.752	127.846	124.363	165.517	162.226	115.889	261.096	166.336	239.907	138.191	167.725	139.215	195.251	176.788
TKOv3_44708	PEF1	102.83	148.744	44.1055	44.7572	44.8139	53.9207	22.7747	19.3789	58.5139	150.283	74.5443	40.2176	65.8151	60.7286
TKOv3_70217	ZNF781	160.206	168.412	309.462	310.767	267.091	267.189	184.638	216.398	283.792	245.289	251.097	260.899	249	209.176
TKOv3_69771	ZNF587B	251.114	201.603	274.756	172.273	281.431	200.392	325.353	260.808	261.85	234.925	346.239	272.242	230.353	333.333
TKOv3_08883	CABLES1	106.556	119.241	36.8751	10.1337	5.37767	28.9723	9.7606	38.7578	20.4799	44.9121	27.4637	24.7493	14.2599	22.9419
TKOv3_18428	EEF1A2	155.735	104.489	97.6105	93.7367	92.3166	89.3313	86.2187	72.6709	90.6965	93.279	52.9657	63.9357	100.916	62.0781
TKOv3_40128	NOM1	248.878	212.667	92.5493	105.559	57.3618	122.327	66.6975	82.3603	61.4396	82.9147	149.089	123.746	48.2644	133.603
TKOv3_26482	HAUS8	205.66	188.081	134.486	184.096	216.003	108.646	183.011	182.485	137.508	207.287	175.571	199.026	94.3349	159.244
TKOv3_03183	APOBEC2	145.303	148.744	68.6889	92.8922	51.0878	73.2355	145.596	104.162	181.393	148.555	104.951	111.372	105.304	157.894
TKOv3_32691	LDHB	169.148	222.501	143.885	219.563	226.758	279.261	180.571	143.727	210.65	176.194	154.974	188.713	227.062	209.176
TKOv3_69785	ZNF593	287.626	265.526	195.221	152.005	134.442	134.399	74.0179	244.659	193.096	181.376	173.61	146.433	149.181	164.642
TKOv3_32845	LGALS12	210.131	210.208	167.746	161.295	193.596	82.0882	178.131	174.41	244.296	217.651	206.958	184.589	183.185	125.506
TKOv3_44655	PDZD4	325.628	357.723	367.305	287.121	446.346	421.708	350.568	298.758	235.518	240.107	279.541	246.462	232.547	257.759
TKOv3_38432	MYRIP	345.002	367.557	440.332	306.544	386.296	268.799	274.924	365.777	266.238	399.027	417.84	406.301	323.591	350.876
TKOv3_59949	TAS2R41	482.853	544.575	506.852	559.042	535.974	650.267	360.329	426.336	539.791	528.581	561.044	492.924	428.895	595.141
TKOv3_52116	RPS19BP1	231.74	239.711	296.447	368.191	351.341	299.38	182.198	264.845	318.901	274.655	259.924	295.96	287.392	353.576
TKOv3_39993	NMNAT2	206.405	169.642	149.67	161.295	145.197	123.937	168.37	209.938	118.491	103.643	164.782	176.339	148.084	224.021
TKOv3_17820	DSG1	250.368	237.253	144.608	203.518	130.857	304.209	153.729	185.714	279.404	304.02	260.905	299.054	222.674	241.565
TKOv3_53017	SCAI	176.599	188.081	123.64	218.719	165.811	151.3	153.729	176.025	131.656	155.465	145.165	216.556	214.996	160.593
TKOv3_63875	TRIM46	199.699	200.374	36.8751	63.3356	84.2501	98.9887	110.62	36.3354	95.0851	119.19	58.8507	94.8723	70.2027	98.5153
TKOv3_08476	C7orf31	158.716	197.915	284.878	377.48	334.312	310.647	178.944	201.056	178.467	186.558	157.916	178.401	183.185	163.293
TKOv3_18441	EEF1G	132.636	173.33	72.3041	52.3574	19.7181	43.4585	55.3101	17.764	38.034	57.0038	56.8891	25.7805	29.6168	36.4372
TKOv3_69643	ZNF555	243.662	269.214	465.638	321.745	327.141	441.828	387.984	410.187	320.364	395.572	306.024	290.804	333.463	240.215
TKOv3_08776	C9orf78	218.327	244.628	209.682	159.606	118.309	164.176	205.786	224.472	213.576	158.92	207.939	228.931	264.357	219.973
TKOv3_18404	EDN3	89.4173	84.8209	253.787	146.939	117.412	169.005	201.719	184.907	131.656	105.371	142.223	156.746	138.212	78.2724
TKOv3_62317	TMEM239	158.716	172.1	158.346	152.85	128.168	135.204	149.663	262.423	149.21	153.738	195.188	173.245	172.216	148.448
TKOv3_02029	ALDH1L2	245.152	212.667	133.04	159.606	155.952	179.467	147.222	156.646	193.096	184.831	171.648	183.557	166.732	224.021
TKOv3_49829	RANBP3	324.883	357.723	229.204	293.877	230.343	220.511	300.139	275.342	415.449	476.759	285.426	367.115	406.957	327.935
TKOv3_25039	GPANK1	354.689	379.85	454.07	445.883	345.067	393.54	295.258	324.597	298.421	309.203	396.262	334.116	293.974	330.634
TKOv3_34918	MAP3K5	212.366	197.915	265.356	263.476	230.343	189.93	360.329	224.472	188.707	215.924	212.844	260.899	331.269	307.692
TKOv3_67038	WDR66	131.145	143.827	135.932	93.7367	107.553	120.718	210.666	113.044	127.268	112.28	112.797	89.7162	129.436	79.622
TKOv3_08574	C8orf31	270.487	285.195	360.074	258.409	457.998	427.341	395.304	399.69	301.347	312.657	402.147	352.678	288.489	369.77
TKOv3_65654	UNC119B	215.347	252.004	206.067	270.232	184.633	126.351	222.867	259.193	296.958	196.922	185.38	279.461	359.789	190.283
TKOv3_24673	GMPPA	259.31	304.863	287.77	342.857	242.891	237.412	342.434	293.913	304.272	279.837	246.192	269.149	284.102	253.711
TKOv3_08517	C7orf62	194.483	191.769	159.792	247.431	207.04	315.476	216.36	188.944	191.633	150.283	204.016	169.12	154.665	170.04
TKOv3_13736	COMMD9	428.458	427.792	359.351	438.282	288.601	298.576	303.392	372.236	488.591	513.034	369.779	424.863	422.313	357.624
TKOv3_60036	TBC1D13	344.257	312.239	439.609	319.212	233.032	441.828	334.301	450.559	198.947	226.288	329.564	216.556	255.582	338.731
TKOv3_12186	CHML	319.667	295.029	290.663	301.478	302.942	261.555	348.128	243.044	266.238	310.93	307.005	343.397	397.084	295.546
TKOv3_05378	BBOX1	176.599	163.495	222.697	224.63	181.944	235.802	215.547	303.603	131.656	146.828	161.84	114.466	173.313	145.749
TKOv3_59779	TAGAP	149.029	122.929	89.6571	70.9359	146.99	177.858	82.9651	184.907	149.21	143.373	147.127	108.278	149.181	140.351
TKOv3_05959	BNIP1	168.403	169.642	145.331	149.472	146.093	90.9408	172.437	117.888	156.525	103.643	122.606	104.153	185.379	121.457
TKOv3_53977	SERPINE3	394.181	408.124	699.181	590.288	690.134	719.479	668.601	571.677	478.351	366.206	497.289	401.145	487.032	448.042
TKOv3_38488	NAA10	184.051	184.393	45.5516	10.1337	12.5479	51.5063	56.9369	21.8013	14.6285	15.5465	2.94254	25.7805	13.163	5.3981
TKOv3_43198	P2RX4	137.107	100.802	82.4267	120.76	172.982	113.475	155.356	172.795	144.822	198.65	171.648	157.777	153.568	175.438
TKOv3_24754	GNAZ	239.191	180.705	300.062	345.39	349.548	281.675	261.096	298.758	257.461	221.106	237.365	193.87	223.771	183.535
TKOv3_58336	SS18L1	251.859	317.156	132.317	266.01	214.21	207.635	159.423	161.491	185.782	245.289	249.135	263.993	274.229	201.079
TKOv3_30786	KCTD3	257.075	264.297	287.047	234.764	364.785	276.846	200.092	356.895	302.809	302.293	241.288	278.43	275.326	272.604
TKOv3_16135	DDX24	198.954	178.247	61.4585	58.2688	107.553	41.8489	47.1762	35.528	24.8684	44.9121	55.9082	50.5298	21.9384	36.4372
TKOv3_03901	ARMCX3	299.548	292.571	384.658	320.056	409.599	355.715	302.579	309.255	198.947	276.382	354.085	272.242	277.52	229.419
TKOv3_50552	REEP6	217.582	189.31	222.697	135.96	203.455	250.288	110.62	147.764	160.913	164.102	128.491	150.558	214.996	160.593
TKOv3_41729	OR13C9	455.283	395.831	506.852	738.916	531.493	634.171	662.094	797.765	724.109	374.843	548.293	468.174	702.027	507.421
TKOv3_47494	PRAMEF2	98.359	162.266	135.932	104.715	119.205	94.9648	125.261	44.41	137.508	126.099	139.28	92.8099	109.692	148.448
TKOv3_35122	2023-03-03	115.497	115.553	214.743	186.629	107.553	127.961	126.888	141.304	156.525	186.558	147.127	205.213	132.727	148.448
TKOv3_23888	GCNT3	216.837	248.316	263.91	188.318	296.668	230.169	182.198	222.857	220.89	195.195	203.035	244.399	269.842	317.138
TKOv3_62867	TNFAIP8	256.33	266.755	359.351	407.037	384.503	298.576	393.678	329.441	289.644	247.017	277.579	270.18	267.648	368.42
TKOv3_28248	HYKK	162.441	157.349	93.9953	157.917	144.301	109.451	160.237	205.093	209.187	152.01	130.452	152.621	205.124	124.156
TKOv3_16314	DEFB115	189.267	180.705	315.246	252.498	251.854	425.732	233.441	279.379	253.073	255.654	225.595	244.399	238.031	192.982
TKOv3_22971	FRS3	186.286	194.227	103.395	106.404	149.678	90.136	137.462	86.3976	160.913	115.735	196.169	105.185	171.119	187.584
TKOv3_18081	DYM	230.25	264.297	334.768	380.858	204.351	314.671	245.642	280.187	272.09	329.931	315.832	362.99	240.225	338.731
TKOv3_51755	ROBO3	309.98	307.322	415.749	289.655	465.168	473.214	408.319	469.131	279.404	255.654	339.373	329.991	300.555	345.478
TKOv3_61067	THAP6	269.742	231.106	364.413	260.943	484.886	354.106	328.607	317.329	295.495	317.84	374.683	322.772	295.071	398.11
TKOv3_13156	CMTR1	68.5533	87.2794	56.3972	54.0464	54.6729	24.1436	35.7889	102.547	54.1254	38.0026	52.9657	43.3113	64.7182	35.0876
TKOv3_33252	LMBRD2	178.835	233.565	334.768	307.389	255.439	245.46	226.934	304.41	193.096	243.562	249.135	270.18	273.133	217.274
TKOv3_46327	PMEPA1	262.291	242.17	246.557	385.925	370.163	330.767	390.424	319.752	332.066	229.743	290.33	271.211	301.652	321.187
TKOv3_12477	CIB4	59.6115	66.3815	39.7673	16.045	64.532	91.7456	51.2432	71.056	87.7708	69.0956	46.0998	58.7796	62.5243	47.2334
TKOv3_12965	CLNK	78.9853	63.923	120.025	184.94	106.657	99.7935	181.385	125.963	98.0108	110.553	129.472	113.434	94.3349	94.4667
TKOv3_22745	FOXH1	214.602	237.253	135.209	111.471	134.442	81.2834	191.145	188.137	130.193	172.739	195.188	215.525	205.124	151.147
TKOv3_05302	BANK1	194.483	205.291	363.69	385.081	437.383	285.699	334.301	350.435	238.444	214.196	194.207	278.43	171.119	187.584
TKOv3_40162	NOP9	236.211	265.526	71.5811	101.337	78.8724	82.0882	94.3525	92.8572	165.302	95.0064	108.874	176.339	179.895	199.73
TKOv3_18526	EFEMP2	219.072	191.769	218.358	285.433	231.24	173.834	201.719	167.143	112.639	205.559	172.629	190.776	168.925	161.943
TKOv3_30943	KHDRBS3	85.6916	104.489	127.255	202.674	129.064	155.324	145.596	134.037	92.1594	103.643	123.587	146.433	133.824	170.04
TKOv3_52991	SBSPON	96.1236	90.9673	112.071	179.029	104.864	115.084	198.466	142.919	128.731	112.28	89.257	103.122	120.661	117.409
TKOv3_13905	COX18	184.796	141.368	65.7967	65.869	79.7687	43.4585	54.4967	101.739	138.971	110.553	154.974	98.9972	180.991	157.894
TKOv3_04809	ATP6V1G1	284.645	255.692	297.893	464.461	428.421	387.102	602.717	489.317	465.185	419.755	411.955	408.363	470.578	516.868
TKOv3_40444	NR0B2	136.361	142.597	157.623	122.449	102.176	144.862	125.261	121.118	201.873	191.74	147.127	168.089	191.961	113.36
TKOv3_22753	FOXI2	292.097	341.742	312.354	269.387	403.325	226.95	267.603	380.311	334.992	348.933	275.618	349.584	391.6	329.284
TKOv3_68405	ZFP90	242.917	229.877	209.682	424.771	444.554	383.883	404.252	243.851	264.775	210.741	230.499	290.804	287.392	341.43
TKOv3_62323	TMEM241	228.014	184.393	215.466	181.562	218.692	164.981	99.2328	296.336	226.741	217.651	134.376	279.461	249	201.079
TKOv3_37414	MRPS5	111.026	103.26	60.0124	66.7135	86.0426	90.9408	94.3525	110.621	127.268	91.5516	134.376	70.123	138.212	137.652
TKOv3_51712	RNH1	318.177	286.424	177.145	162.139	71.7022	160.152	203.346	176.832	198.947	264.29	203.035	209.338	179.895	198.38
TKOv3_25750	GRID2IP	429.203	408.124	673.874	694.158	692.823	518.282	483.963	503.044	463.723	507.852	381.549	459.924	439.864	414.304
TKOv3_56483	SLITRK2	216.092	195.457	267.525	314.989	329.83	345.253	244.828	294.721	177.005	150.283	266.79	252.649	137.115	148.448
TKOv3_12309	CHRNA10	147.539	156.12	222.697	140.183	187.322	198.782	156.983	174.41	68.7538	57.0038	141.242	74.2479	94.3349	145.749
TKOv3_13328	CNPY2	200.444	210.208	91.1032	111.471	89.6278	45.8728	91.9123	70.2485	119.953	215.924	102.989	127.871	102.013	124.156
TKOv3_58970	STX18	215.347	185.622	183.652	186.629	145.197	164.981	152.916	137.267	128.731	146.828	206.958	159.839	179.895	165.992
TKOv3_27229	HIST3H3	260.055	244.628	252.341	326.812	196.285	236.607	196.839	231.739	178.467	229.743	198.131	250.587	197.445	236.167
TKOv3_57668	SPATA6L	219.072	245.858	295.724	484.729	274.261	291.333	383.104	336.708	172.616	229.743	200.093	246.462	201.833	256.41
TKOv3_48087	PRR22	231.74	275.36	185.099	168.895	130.857	142.447	230.188	234.969	244.296	219.378	151.05	186.651	150.278	133.603
TKOv3_39159	NDUFB10	122.949	184.393	39.7673	19.4229	58.258	20.9244	34.9755	10.4969	64.3653	60.4586	90.2378	58.7796	77.8812	33.7381
TKOv3_24027	GEMIN6	181.07	179.476	75.9193	45.6016	124.583	95.7696	146.409	121.926	96.5479	82.9147	90.2378	50.5298	69.1058	101.214
TKOv3_12284	CHRM1	139.342	253.233	121.471	73.4693	83.3538	141.642	95.1659	83.9752	174.079	176.194	188.322	199.026	136.018	213.225
TKOv3_30319	KBTBD13	242.172	221.272	221.251	135.116	225.862	247.069	256.216	209.938	193.096	210.741	217.748	233.056	167.828	353.576
TKOv3_58420	SST	141.577	126.617	276.202	328.501	302.942	263.97	353.008	162.298	241.37	212.469	192.246	215.525	238.031	197.031
TKOv3_43155	OXGR1	137.852	131.534	148.223	252.498	200.766	291.333	237.508	241.429	157.988	157.192	153.993	157.777	118.467	141.7
TKOv3_15421	CYP27C1	290.606	238.482	129.424	150.317	92.3166	45.068	174.064	74.2858	171.153	179.648	181.456	189.745	144.793	197.031
TKOv3_03000	AP3D1	143.813	132.763	106.287	70.9359	42.125	104.622	103.3	65.4038	112.639	120.917	85.3336	123.746	130.533	110.661
TKOv3_27912	HSD17B1	179.58	190.54	111.348	188.318	79.7687	136.814	122.008	156.646	156.525	131.282	79.4485	152.621	162.344	112.011
TKOv3_14845	CTH	285.39	335.596	149.67	158.761	103.072	148.885	102.486	114.658	119.953	152.01	151.05	178.401	164.538	163.293
TKOv3_04085	ASAH2	318.177	298.717	96.1645	85.292	224.069	130.375	99.2328	126.77	125.805	100.189	140.261	133.027	127.242	132.253
TKOv3_27114	HIST1H2AD	157.225	146.285	175.699	128.36	126.375	169.81	106.553	155.839	125.805	127.827	117.701	110.341	119.564	136.302
TKOv3_09964	CCDC172	209.386	186.852	246.557	141.872	235.721	313.062	139.089	167.143	159.45	200.377	183.418	230.993	234.74	184.885
TKOv3_34497	MACROD2	206.405	181.935	282.709	305.7	246.476	172.224	298.512	276.149	206.261	202.104	177.533	181.495	183.185	141.7
TKOv3_10187	CCDC79	152.009	110.636	75.1963	119.915	59.1543	119.913	148.849	168.758	146.285	148.555	110.836	141.277	186.476	95.8163
TKOv3_15978	DCTN3	105.81	83.5916	6.50737	10.1337	37.6437	31.3867	17.0811	21.8013	5.85139	8.63694	25.502	18.562	8.77534	8.09715
TKOv3_23637	GAPVD1	191.502	233.565	266.802	276.143	216.899	265.579	126.888	232.547	374.489	305.748	279.541	281.523	320.3	286.099
TKOv3_45766	PKNOX2	307.745	308.551	263.187	271.076	339.689	292.942	326.167	277.764	446.168	290.201	368.798	351.646	376.243	286.099
TKOv3_61184	THRB	350.218	295.029	390.442	370.724	435.591	359.739	340.808	378.696	354.009	323.022	340.353	289.773	326.882	337.381
TKOv3_22366	FKBP11	304.019	249.545	292.109	316.678	255.439	328.353	339.994	334.286	358.398	259.108	319.756	385.677	400.375	356.275
TKOv3_44714	PEG10	125.929	114.324	214.743	105.559	187.322	156.933	184.638	162.298	131.656	103.643	113.778	90.7474	88.8503	109.312
TKOv3_14648	CSNK2A2	368.846	335.596	514.805	515.13	638.15	590.713	563.675	661.305	485.665	464.668	360.951	463.018	529.811	434.547
TKOv3_57681	SPATA9	213.111	259.38	156.177	258.409	305.631	270.408	308.272	249.503	269.164	329.931	312.89	283.586	212.802	246.963
TKOv3_10692	CD200	204.915	243.399	233.542	267.699	251.854	256.727	265.163	188.944	168.227	262.563	227.556	270.18	296.168	265.856
TKOv3_57077	SNTB2	119.223	119.241	114.964	190.851	74.391	108.646	97.606	93.6647	89.2337	107.098	54.9274	118.59	66.912	41.8353
TKOv3_27649	HOXC4	341.276	324.532	286.324	309.078	315.49	366.982	265.163	364.162	285.255	193.468	362.913	237.181	377.34	298.245
TKOv3_12265	CHPT1	175.109	218.813	216.189	202.674	254.543	151.3	234.254	192.982	263.313	281.564	283.464	353.709	164.538	287.449
TKOv3_39113	NDUFA7	298.803	303.634	217.635	369.88	567.344	375.03	331.861	348.82	320.364	359.297	378.606	389.801	311.525	315.789
TKOv3_46228	PLP2	315.941	308.551	459.854	364.813	288.601	300.185	284.684	351.242	314.512	385.208	318.775	356.802	408.053	296.895
TKOv3_15107	CX3CR1	221.308	274.131	371.643	306.544	236.617	276.846	320.473	294.721	348.158	400.754	409.994	414.551	453.027	489.878
TKOv3_16750	DIAPH2	132.636	143.827	61.4585	58.2688	99.4868	42.6537	94.3525	87.205	106.788	101.916	59.8316	73.2167	98.7226	109.312
TKOv3_58310	SRSF5	169.148	137.68	187.991	99.648	87.8352	119.913	93.5391	202.671	169.69	164.102	137.318	101.06	112.983	180.836
TKOv3_36993	MPV17L	139.342	146.285	87.488	97.1146	77.0799	77.2595	118.754	36.3354	83.3823	81.1873	75.5251	71.1542	39.489	64.7772
TKOv3_08037	C2orf82	309.235	255.692	221.974	356.368	283.224	432.975	294.445	375.466	228.204	257.381	238.346	248.524	249	224.021
TKOv3_60650	TEKT5	157.971	165.954	165.576	127.516	122.79	118.304	156.17	197.826	150.673	177.921	210.882	160.87	162.344	175.438
TKOv3_08117	C3orf58	277.194	322.073	323.199	412.948	322.66	329.158	378.223	308.447	260.387	233.197	275.618	314.522	274.229	314.439
TKOv3_45399	PIGF	248.878	264.297	404.903	394.37	405.117	355.715	400.185	348.013	358.398	362.752	284.445	272.242	400.375	295.546
TKOv3_48118	PRR5L	273.468	255.692	237.157	283.744	195.389	311.452	316.406	223.665	295.495	293.656	248.154	268.117	381.727	234.817
TKOv3_24986	GOT1	206.405	170.871	205.344	200.985	170.293	151.3	238.321	266.46	196.022	231.47	185.38	195.932	257.776	180.836
TKOv3_35224	MAST3	239.936	253.233	230.65	186.629	149.678	103.817	215.547	152.609	220.89	240.107	302.101	263.993	252.291	153.846
TKOv3_32878	LGALS9	119.223	146.285	323.922	378.325	217.795	321.914	148.036	255.155	177.005	269.473	185.38	256.774	217.19	163.293
TKOv3_15069	CUX1	142.323	129.075	338.383	339.479	222.277	218.902	158.61	252.733	213.576	165.829	161.84	196.963	224.868	155.195
TKOv3_48647	PTCHD3	272.723	231.106	318.138	262.632	321.764	341.229	405.878	435.218	282.33	335.113	240.307	460.956	403.666	319.837
TKOv3_67897	ZBTB26	422.497	497.862	522.036	613.933	576.306	661.534	756.447	649.193	558.808	637.406	561.044	640.388	652.666	654.52
TKOv3_48698	PTGER3	124.439	163.495	149.67	67.558	207.04	188.32	141.529	154.224	157.988	110.553	163.801	129.934	201.833	133.603
TKOv3_15205	CXorf24	201.189	222.501	161.238	223.786	223.173	154.519	229.374	209.938	213.576	203.832	269.733	245.431	188.67	233.468
TKOv3_42203	OR4N4	144.558	143.827	198.113	150.317	241.099	167.396	217.173	196.211	172.616	183.103	183.418	242.337	272.036	141.7
TKOv3_36677	MMRN1	195.228	172.1	206.067	190.851	224.966	215.683	237.508	251.118	222.353	174.466	246.192	159.839	216.093	238.866
TKOv3_54513	SHBG	141.577	157.349	101.949	107.248	74.391	57.9446	82.1517	121.926	90.6965	124.372	95.142	94.8723	123.952	78.2724
TKOv3_27531	HOOK2	216.837	220.043	239.327	283.744	274.261	243.85	192.772	210.745	239.907	274.655	310.928	362.99	224.868	344.129
TKOv3_70420	ZNFX1	80.4756	97.1137	69.4119	129.205	100.383	132.79	140.715	134.845	81.9195	115.735	88.2761	119.622	69.1058	112.011
TKOv3_39643	NGRN	346.492	378.621	216.912	213.652	191.803	141.642	122.008	195.404	317.438	298.838	388.415	213.463	303.846	318.488
TKOv3_34334	LYZL4	152.009	142.597	87.488	205.207	158.641	256.727	76.4581	243.851	159.45	143.373	128.491	148.496	100.916	93.1172
TKOv3_32165	KRT6A	204.17	158.578	195.944	227.164	195.389	107.841	162.677	115.466	102.399	171.011	191.265	97.966	122.855	182.186
TKOv3_54588	SHKBP1	224.288	260.609	206.067	238.142	174.774	210.049	251.336	311.677	210.65	335.113	290.33	464.049	401.472	279.352
TKOv3_07561	C1orf177	134.126	156.12	59.2894	46.4461	63.6357	45.068	75.6447	57.3292	95.0851	70.8229	67.6784	143.34	86.6565	114.71
TKOv3_68069	ZC3H7A	280.174	239.711	144.608	144.405	163.123	149.69	135.022	169.565	187.244	131.282	143.203	97.966	133.824	117.409
TKOv3_24714	GNAI1	406.104	463.442	491.668	561.576	636.357	545.645	476.643	408.572	494.442	490.578	456.093	511.485	548.459	489.878
TKOv3_48592	PSTPIP1	235.466	233.565	151.839	137.649	265.298	148.081	195.212	247.081	174.079	177.921	219.709	152.621	171.119	214.574
TKOv3_69404	ZNF451	157.971	149.973	169.915	161.295	197.181	4.02393	4.06692	8.07454	209.187	190.013	213.824	100.028	57.0397	63.4277
TKOv3_43132	OVOL3	248.878	253.233	191.606	332.723	199.87	234.998	339.181	310.87	177.005	190.013	191.265	268.117	338.948	302.294
TKOv3_36467	MLF1	237.701	280.278	187.991	217.03	225.862	127.156	100.046	158.261	232.593	240.107	249.135	305.241	273.133	263.157
TKOv3_58981	STX1A	273.468	253.233	344.891	250.809	286.809	284.09	292.005	344.783	267.701	267.745	204.997	278.43	211.705	203.778
TKOv3_09154	CALU	184.796	196.686	357.182	293.877	172.085	160.957	300.952	212.36	209.187	248.744	269.733	243.368	155.762	170.04
TKOv3_08179	C4orf26	271.978	266.755	415.749	278.677	358.511	339.62	352.195	352.05	279.404	383.48	379.587	450.643	368.564	553.305
TKOv3_40311	NPFFR1	246.643	291.341	185.099	251.654	274.261	180.272	167.557	276.957	141.896	134.736	223.633	197.994	196.348	203.778
TKOv3_01392	ADPRM	209.386	253.233	511.913	405.348	266.194	389.516	280.617	297.951	272.09	281.564	269.733	302.148	240.225	249.662
TKOv3_51345	RNASEH2B	180.325	142.597	115.687	61.6467	48.399	147.276	148.036	146.957	73.1424	96.7338	131.433	57.7484	71.2997	122.807
TKOv3_14112	CPO	194.483	217.584	187.991	360.591	309.216	251.093	248.082	327.019	217.964	215.924	245.211	233.056	144.793	172.739
TKOv3_27891	HSBP1	250.368	252.004	258.849	217.03	216.899	221.316	291.191	224.472	239.907	171.011	243.25	213.463	255.582	296.895
TKOv3_66391	VIMP	163.932	152.432	32.5368	138.494	113.827	70.0164	64.2573	68.6336	163.839	79.4599	52.9657	124.778	66.912	63.4277
TKOv3_44504	PDHB	137.107	162.266	161.238	150.317	248.269	175.443	177.318	144.534	162.376	177.921	219.709	171.183	229.256	184.885
TKOv3_04645	ATP2B4	93.143	127.846	44.1055	70.9359	177.463	97.3791	57.7502	63.7889	93.6222	96.7338	97.1037	75.2791	84.4627	83.6705
TKOv3_30185	JRKL	175.854	177.017	241.496	292.188	279.639	315.476	308.272	155.031	204.799	248.744	201.073	242.337	177.701	198.38
TKOv3_23690	GAS8	153.5	135.222	130.147	71.7804	68.1171	107.037	66.6975	86.3976	92.1594	110.553	99.0654	127.871	74.5904	116.059
TKOv3_55111	SLC16A6	152.755	148.744	77.3654	61.6467	75.2873	100.598	75.6447	134.037	121.416	110.553	136.338	130.965	96.5288	168.691
TKOv3_02976	AP2A2	139.342	119.241	141.716	23.6453	77.0799	90.136	72.3911	44.41	26.3313	74.2777	104.951	39.1864	27.4229	82.321
TKOv3_40820	NTN5	184.051	218.813	193.775	154.539	194.492	144.862	185.451	214.783	204.799	167.557	204.016	203.15	265.454	280.701
TKOv3_34930	MAP3K7CL	143.813	156.12	119.302	193.385	198.077	136.814	139.089	176.832	177.005	153.738	165.763	183.557	142.599	191.633
TKOv3_14960	CTSK	233.23	252.004	138.101	109.782	186.426	126.351	196.839	222.857	196.022	179.648	182.437	156.746	236.934	170.04
TKOv3_34702	MAK16	126.675	87.2794	67.9659	88.6699	54.6729	93.3552	96.7926	136.46	52.6625	50.0943	50.0231	47.4362	51.5551	43.1848
TKOv3_53744	SENP8	203.424	206.52	206.067	262.632	267.987	161.762	215.547	192.982	185.782	298.838	327.603	226.869	196.348	195.681
TKOv3_21056	FAM227A	131.145	137.68	147.5	182.407	142.508	283.285	136.648	96.087	112.639	188.285	108.874	120.653	107.498	101.214
TKOv3_40095	NOL12	440.38	460.983	235.711	170.584	220.484	261.555	96.7926	254.348	267.701	224.561	338.392	312.46	402.569	448.042
TKOv3_28380	IDI1	277.194	245.858	264.633	434.06	411.391	278.456	282.244	286.646	302.809	361.024	279.541	296.992	309.331	228.07
TKOv3_21581	FBLN7	274.213	261.838	320.307	361.435	265.298	272.823	283.871	331.056	266.238	214.196	294.254	202.119	277.52	218.623
TKOv3_43997	PCDHB13	187.776	181.935	179.314	168.895	176.567	182.686	246.455	268.075	171.153	86.3694	192.246	114.466	199.639	167.341
TKOv3_68840	ZNF205	146.793	136.451	205.344	103.026	151.471	96.5743	100.86	71.056	112.639	162.375	113.778	119.622	122.855	94.4667
TKOv3_07046	C16orf70	269.742	238.482	240.05	294.722	209.729	159.348	148.036	237.391	215.039	203.832	190.284	280.492	179.895	257.759
TKOv3_56258	SLC7A1	128.91	137.68	112.794	84.4475	117.412	157.738	143.156	79.1305	207.724	250.471	116.721	267.086	157.956	151.147
TKOv3_08025	C2orf78	128.91	158.578	169.915	227.164	240.202	218.097	241.575	169.565	242.833	115.735	202.054	214.494	157.956	218.623
TKOv3_48023	PRPH	131.145	116.782	114.24	121.604	148.782	124.742	79.7116	85.5901	100.936	114.008	101.027	68.0606	58.1366	70.1753
TKOv3_01355	ADNP2	88.6722	79.9037	55.6742	46.4461	25.0958	37.0202	54.4967	58.1367	59.9767	50.0943	50.0231	64.9669	81.1719	48.5829
TKOv3_26078	GTF2H1	384.494	339.283	231.373	135.96	177.463	228.559	113.874	191.367	264.775	269.473	244.231	287.711	298.362	226.72
TKOv3_43109	OTX2	257.82	201.603	261.741	217.875	324.452	220.511	182.198	279.379	330.604	196.922	292.292	225.837	348.82	276.653
TKOv3_01506	AFG3L2	219.818	254.463	17.353	53.2019	34.9548	94.16	13.8275	24.2236	76.0681	100.189	109.855	70.123	91.0442	134.952
TKOv3_08860	CA9	351.708	309.781	297.17	284.588	378.229	320.305	353.822	267.267	261.85	314.385	270.713	336.178	322.494	390.013
TKOv3_61865	TMEM132A	288.371	331.908	227.035	238.142	196.285	168.2	283.057	149.379	238.444	202.104	247.173	191.807	166.732	197.031
TKOv3_01568	AGFG2	80.4756	120.47	170.638	195.074	162.226	151.3	82.1517	184.1	103.862	160.647	130.452	155.714	118.467	152.496
TKOv3_55265	SLC22A18	154.245	164.725	204.621	129.205	215.107	139.228	177.318	159.068	185.782	167.557	194.207	141.277	214.996	156.545
TKOv3_28741	IGLL5	190.012	175.788	290.663	229.697	258.128	390.321	294.445	340.746	193.096	233.197	267.771	167.058	119.564	233.468
TKOv3_44952	PGBD2	332.334	372.474	489.499	570.865	358.511	409.636	547.407	437.64	317.438	331.659	437.457	375.364	394.89	433.198
TKOv3_30216	KALRN	204.17	217.584	274.756	157.917	324.452	344.448	226.121	234.969	310.124	247.017	300.139	295.96	336.754	388.663
TKOv3_07798	C20orf85	161.696	175.788	274.756	265.165	412.288	276.042	225.307	443.292	267.701	369.661	270.713	314.522	224.868	267.206
TKOv3_22278	FHL3	204.915	192.998	155.454	223.786	212.418	136.009	289.565	193.789	215.039	222.833	215.786	171.183	164.538	163.293
TKOv3_56456	SLFN5	165.422	180.705	177.145	148.628	136.234	75.6499	98.4194	164.721	232.593	129.554	149.089	214.494	268.745	259.109
TKOv3_63363	TPD52L1	93.8882	119.241	102.672	117.382	113.827	45.8728	155.356	46.0249	73.1424	76.0051	102.008	35.0615	100.916	130.904
TKOv3_54552	SHFM1	184.796	248.316	20.2452	29.5566	11.6516	10.4622	4.06692	3.22982	29.2569	19.0013	51.9848	22.6869	76.7842	39.1362
TKOv3_11345	CDK5R2	235.466	192.998	306.569	222.097	237.514	247.874	384.73	238.199	288.181	307.475	231.48	270.18	280.811	206.477
TKOv3_49326	RAB13	213.111	190.54	100.503	95.4257	213.314	149.69	124.448	73.4783	146.285	114.008	111.816	81.4664	150.278	86.3696
TKOv3_42617	OR6C3	201.934	168.412	169.192	239.831	182.841	333.986	302.579	175.218	140.433	110.553	152.031	120.653	117.37	101.214
TKOv3_13812	COQ10A	114.007	140.139	82.4267	69.2469	51.0878	47.4824	89.4722	47.6398	65.8281	58.7312	100.046	50.5298	85.5596	143.05
TKOv3_22123	FGF12	169.893	131.534	183.652	249.965	239.306	213.268	226.934	197.826	185.782	224.561	157.916	155.714	201.833	192.982
TKOv3_10441	CCNDBP1	178.835	126.617	216.912	276.988	146.99	117.499	187.078	171.18	152.136	181.376	231.48	215.525	185.379	288.798
TKOv3_60070	TBC1D21	243.662	212.667	213.297	113.16	293.083	185.906	249.709	150.186	178.467	196.922	150.069	276.367	297.265	203.778
TKOv3_25350	GPR17	398.652	363.869	206.79	331.034	250.958	334.791	263.536	243.851	321.826	253.926	337.411	284.617	380.63	342.779
TKOv3_09298	CAPN15	353.944	360.181	277.648	375.791	352.237	246.265	149.663	251.926	289.644	316.112	343.296	341.334	272.036	315.789
TKOv3_28043	HSPA4L	215.347	201.603	248.003	217.875	185.529	276.846	161.863	167.143	299.884	367.934	298.177	344.428	295.071	291.497
TKOv3_14773	CT62	391.201	430.251	346.337	320.9	362.096	346.863	403.438	325.404	377.415	437.029	449.227	360.927	359.789	388.663
TKOv3_31850	KLK5	336.805	360.181	399.119	592.821	630.979	274.432	434.347	280.187	457.871	381.753	364.875	329.991	320.3	314.439
TKOv3_62827	TMX1	115.497	110.636	73.0272	71.7804	114.724	72.4308	65.0707	137.267	115.565	120.917	138.299	151.589	75.6873	116.059
TKOv3_02376	AMTN	128.165	115.553	132.317	79.3806	152.367	148.885	123.634	200.249	125.805	139.918	97.1037	113.434	116.273	175.438
TKOv3_68519	ZIC3	350.963	390.914	366.582	410.415	424.836	449.071	427.84	246.273	280.867	431.847	337.411	334.116	365.274	376.517
TKOv3_67728	YPEL4	251.114	280.278	329.707	472.906	286.809	340.425	292.005	418.261	340.843	279.837	308.966	280.492	387.212	267.206
TKOv3_15878	DCC	146.793	116.782	277.648	96.2701	116.516	121.523	110.62	162.298	149.21	141.646	144.184	134.059	130.533	179.487
TKOv3_67329	WNT6	81.2207	97.1137	118.579	101.337	113.827	99.7935	114.687	139.69	112.639	129.554	105.931	105.185	68.0089	80.9715
TKOv3_08594	C8orf44	271.978	261.838	493.114	361.435	285.016	368.592	349.755	486.087	269.164	340.296	370.76	347.521	471.675	381.916
TKOv3_38814	NBR1	176.599	200.374	216.189	227.164	174.774	167.396	191.145	261.615	209.187	176.194	197.15	166.027	179.895	217.274
TKOv3_24830	GNGT2	153.5	170.871	104.841	127.516	161.33	177.858	156.983	81.5529	117.028	126.099	168.705	140.246	138.212	120.108
TKOv3_44467	PDF	236.956	261.838	279.094	287.966	270.676	214.878	257.843	319.752	273.552	314.385	300.139	267.086	257.776	256.41
TKOv3_23346	GABPA	205.66	259.38	286.324	286.277	184.633	119.913	175.691	231.739	178.467	236.652	174.591	211.4	150.278	174.089
TKOv3_14271	CREB3L3	152.009	167.183	90.3801	202.674	221.381	118.304	195.212	215.59	159.45	243.562	160.859	268.117	204.027	170.04
TKOv3_26463	HAUS2	194.483	221.272	168.469	206.052	209.729	181.882	229.374	289.069	204.799	286.747	271.694	261.93	312.622	148.448
TKOv3_64906	TWIST2	315.941	336.825	395.503	336.101	341.482	353.301	466.882	335.093	196.022	272.927	236.384	339.272	276.423	248.313
TKOv3_08311	C5orf54	208.64	265.526	223.42	244.898	337	284.894	281.431	455.404	277.941	162.375	236.384	190.776	235.837	221.322
TKOv3_45709	PKDCC	101.34	119.241	169.192	146.094	137.13	107.841	63.4439	84.7827	179.93	108.825	122.606	111.372	213.899	184.885
TKOv3_03534	ARHGAP30	131.145	184.393	163.407	94.5812	111.138	94.16	122.821	173.603	157.988	138.191	194.207	202.119	171.119	234.817
TKOv3_28761	IGSF21	314.451	296.258	140.993	124.982	290.394	214.878	148.036	261.615	210.65	241.834	190.284	194.901	214.996	214.574
TKOv3_14725	CST7	216.092	236.023	255.234	230.542	269.78	259.141	190.332	239.006	236.981	257.381	219.709	250.587	164.538	251.012
TKOv3_16371	DEFB135	99.1042	106.948	151.116	85.292	86.9389	117.499	98.4194	283.416	119.953	133.009	138.299	117.559	93.238	125.506
TKOv3_29835	ITGA2	213.856	212.667	315.246	287.121	275.157	191.539	191.145	167.95	169.69	177.921	247.173	177.37	107.498	234.817
TKOv3_17968	DUSP13	299.548	256.921	220.528	184.94	223.173	263.97	270.043	345.59	270.627	248.744	226.575	217.588	247.903	219.973
TKOv3_16685	DHX29	203.424	220.043	150.393	253.342	220.484	117.499	59.377	237.391	209.187	158.92	257.962	172.214	148.084	182.186
TKOv3_35353	MBNL3	119.968	111.865	201.728	184.94	242.891	167.396	133.395	88.0125	86.308	86.3694	102.989	69.0918	84.4627	90.4182
TKOv3_32749	LEF1	226.524	197.915	240.05	237.297	293.083	265.579	263.536	287.454	270.627	279.837	306.024	236.15	179.895	333.333
TKOv3_00328	ABHD14A	179.58	221.272	193.052	145.25	146.99	93.3552	152.916	79.9379	134.582	153.738	167.725	184.589	160.15	152.496
TKOv3_44634	PDXP	188.521	181.935	391.165	259.254	440.072	204.416	719.844	313.292	228.204	297.111	341.334	222.744	212.802	276.653
TKOv3_70302	ZNF812	257.82	175.788	352.121	287.966	331.623	340.425	347.315	327.826	337.918	272.927	363.894	294.929	426.701	414.304
TKOv3_07039	C16orf62	125.184	132.763	80.2576	61.6467	101.279	64.3829	179.758	126.77	127.268	69.0956	79.4485	86.6225	155.762	118.758
TKOv3_47094	PPM1B	172.873	218.813	237.881	259.254	227.654	340.425	216.36	199.441	194.559	155.465	190.284	136.121	137.115	203.778
TKOv3_25267	GPR137B	363.63	320.844	255.234	166.362	215.107	255.922	255.402	349.628	310.124	367.934	254.039	335.147	265.454	218.623
TKOv3_34284	LYRM1	173.619	170.871	166.299	285.433	158.641	253.508	210.666	203.478	146.285	195.195	179.495	236.15	204.027	219.973
TKOv3_13307	CNOT7	293.587	350.347	258.126	337.79	303.838	268.799	234.254	339.131	321.826	380.026	387.434	268.117	227.062	273.954
TKOv3_16845	DIXDC1	268.997	245.858	280.54	250.809	432.902	234.193	376.597	331.056	301.347	336.841	251.097	316.585	270.939	241.565
TKOv3_64584	TTC30B	323.393	366.328	281.986	291.344	308.319	276.846	340.808	321.367	228.204	331.659	334.468	387.739	335.657	300.944
TKOv3_51578	RNF2	60.3567	47.9422	39.0442	44.7572	94.1091	49.8967	15.4543	45.2174	64.3653	74.2777	51.004	54.6547	39.489	28.34
TKOv3_38423	MYRF	230.25	221.272	172.807	152.005	106.657	138.423	252.962	197.019	118.491	157.192	122.606	142.308	146.987	151.147
TKOv3_56865	SMTNL2	223.543	162.266	185.099	119.071	101.279	177.053	151.289	143.727	168.227	179.648	129.472	215.525	182.088	155.195
TKOv3_58296	SRSF2	257.82	331.908	312.354	296.411	260.817	313.062	232.628	186.522	296.958	354.115	254.039	327.928	220.48	345.478
TKOv3_30758	KCTD16	298.058	263.068	327.538	322.589	300.253	372.616	483.963	364.969	261.85	395.572	294.254	350.615	266.551	271.255
TKOv3_27295	HMBS	241.427	202.832	39.0442	25.3342	33.1623	40.2393	60.1904	44.41	162.376	114.008	204.016	186.651	176.604	186.234
TKOv3_14763	CSTL1	270.487	229.877	440.332	454.328	466.064	462.752	306.646	631.429	405.209	464.668	394.3	478.486	435.476	385.964
TKOv3_19850	ESR1	187.776	135.222	169.915	269.387	232.136	228.559	223.68	131.615	179.93	86.3694	185.38	193.87	155.762	199.73
TKOv3_47934	PROM1	90.1625	60.2351	60.7355	86.1364	56.4655	74.8451	69.951	118.696	115.565	105.371	96.1229	138.184	100.916	99.8648
TKOv3_07615	C1orf213	157.225	129.075	73.0272	111.471	170.293	107.037	96.7926	271.305	111.176	110.553	144.184	123.746	40.586	140.351
TKOv3_12202	CHMP2B	115.497	163.495	113.517	85.292	70.8059	66.7973	74.0179	52.4845	163.839	93.279	104.951	123.746	178.798	122.807
TKOv3_64023	TRMT1	225.779	277.819	49.8898	47.2906	106.657	53.9207	104.926	65.4038	200.41	103.643	189.303	224.806	302.749	249.662
TKOv3_17379	DNM1L	160.206	185.622	28.9216	59.1132	33.1623	57.9446	98.4194	37.1429	80.4566	93.279	84.3527	110.341	104.207	97.1658
TKOv3_26523	HBQ1	187.776	157.349	153.285	183.251	176.567	123.937	127.701	94.4721	111.176	127.827	121.625	154.683	94.3349	140.351
TKOv3_06584	C11orf30	98.359	103.26	66.5198	92.0478	62.7394	32.1914	51.2432	109.814	70.2167	65.6408	83.3719	60.842	69.1058	52.6315
TKOv3_60353	TCEB3B	230.995	280.278	159.792	231.386	210.625	242.241	269.23	130	174.079	150.283	170.667	263.993	208.414	144.399
TKOv3_35580	MDH2	208.64	200.374	190.16	229.697	267.091	284.894	283.057	236.584	196.022	174.466	148.108	108.278	177.701	95.8163
TKOv3_44783	PET117	116.988	136.451	2.89216	24.4898	17.0293	2.41436	31.722	43.6025	111.176	81.1873	124.567	56.7171	94.3349	52.6315
TKOv3_37783	MTMR11	163.187	222.501	220.528	186.629	197.181	226.95	223.68	146.957	193.096	169.284	187.342	207.275	173.313	190.283
TKOv3_44593	PDPN	185.541	233.565	149.67	95.4257	164.019	181.077	136.648	196.211	207.724	148.555	159.878	183.557	183.185	214.574
TKOv3_65345	UBN2	82.711	79.9037	170.638	141.027	128.168	93.3552	236.695	146.957	89.2337	74.2777	75.5251	82.4977	55.9428	68.8258
TKOv3_07503	C1orf122	425.477	425.334	287.047	241.52	238.41	299.38	329.42	274.534	276.478	298.838	343.296	256.774	340.045	340.08
TKOv3_59786	TAGLN2	212.366	264.297	184.375	135.96	171.189	115.889	107.367	100.124	155.062	155.465	186.361	106.216	217.19	234.817
TKOv3_35437	MCF2	187.776	184.393	247.28	214.497	207.936	247.874	242.388	332.671	226.741	247.017	258.943	190.776	235.837	237.516
TKOv3_70197	ZNF775	499.247	507.696	441.055	472.906	479.508	463.557	418.079	553.913	433.003	500.943	479.634	425.894	580.27	402.158
TKOv3_38570	NACA	206.405	288.883	92.5493	127.516	63.6357	63.5781	80.525	29.0683	81.9195	129.554	112.797	102.091	81.1719	126.855
TKOv3_59231	SURF6	298.803	252.004	307.292	282.899	186.426	222.121	162.677	264.037	232.593	169.284	151.05	213.463	238.031	256.41
TKOv3_21649	FBXL20	149.029	149.973	135.932	210.274	181.048	238.217	313.153	154.224	187.244	183.103	129.472	220.681	170.022	156.545
TKOv3_36114	MFSD2B	360.65	318.386	366.582	407.881	376.437	527.94	552.287	298.758	443.243	380.026	440.4	433.113	513.358	497.975
TKOv3_64816	TUBE1	66.3178	119.241	56.3972	13.5116	25.0958	44.2632	18.7078	53.292	70.2167	57.0038	89.257	84.5601	60.3305	52.6315
TKOv3_27129	HIST1H2BA	173.619	145.056	323.199	167.206	185.529	154.519	235.068	267.267	257.461	274.655	204.016	196.963	229.256	165.992
TKOv3_32002	KRBA2	264.526	243.399	240.05	141.027	322.66	239.826	217.173	235.777	276.478	266.018	246.192	286.679	335.657	267.206
TKOv3_18049	DUT	112.517	120.47	22.4143	13.5116	0	4.02393	13.0141	3.22982	32.1826	15.5465	41.1955	21.6556	24.1322	53.981
TKOv3_19172	EMILIN2	158.716	215.125	146.054	126.671	88.7315	68.4068	124.448	93.6647	100.936	209.014	134.376	146.433	84.4627	170.04
TKOv3_33185	LIPM	278.684	265.526	293.555	366.502	295.772	276.042	305.832	289.069	320.364	278.11	391.357	346.49	262.163	325.236
TKOv3_14288	CREBL2	84.2013	68.8401	31.8138	42.2237	69.0134	52.3111	42.2959	109.006	51.1997	95.0064	81.4102	119.622	62.5243	79.622
TKOv3_43294	PABPC5	222.798	238.482	292.832	359.746	274.261	210.049	292.005	354.472	318.901	305.748	276.599	438.269	307.137	272.604
TKOv3_65958	USP27X	235.466	208.979	336.214	214.497	309.216	240.631	406.692	303.603	255.998	307.475	219.709	269.149	315.912	188.933
TKOv3_43581	PAQR6	234.72	295.029	208.959	188.318	323.556	217.292	169.997	329.441	231.13	215.924	271.694	228.931	146.987	179.487
TKOv3_48494	PSMD14	110.281	126.617	49.8898	30.4011	53.7767	84.5025	94.3525	43.6025	77.5309	44.9121	54.9274	59.8108	63.6212	52.6315
TKOv3_29306	INHBC	284.645	309.781	151.839	110.626	139.819	88.5265	130.955	155.839	184.319	164.102	224.614	196.963	183.185	242.914
TKOv3_27898	HSD11B1	522.346	591.287	356.459	374.102	621.12	556.912	503.484	485.28	367.175	371.389	439.419	424.863	446.446	390.013
TKOv3_37212	MRPL32	87.927	38.1079	65.7967	84.4475	43.0213	92.5504	115.5	142.112	90.6965	63.9134	35.3104	41.2488	58.1366	41.8353
TKOv3_20397	FAM107A	360.65	323.303	323.199	384.236	315.49	444.242	331.047	378.696	378.877	343.75	331.526	466.112	365.274	286.099
TKOv3_64798	TUBB4A	558.113	538.428	425.871	460.239	547.626	614.052	513.245	679.876	456.408	459.485	533.58	563.047	470.578	634.277
TKOv3_29151	IL6R	322.647	376.162	352.844	168.895	256.335	305.819	180.571	296.336	257.461	326.476	319.756	322.772	434.379	338.731
TKOv3_33902	LRRC8E	201.934	208.979	245.111	213.652	335.208	210.049	306.646	300.373	223.816	228.015	171.648	368.146	250.097	203.778
TKOv3_25878	GRPEL2	278.684	280.278	348.506	343.701	216.899	435.389	296.072	267.267	212.113	343.75	254.039	282.554	299.459	245.614
TKOv3_40363	NPPB	167.657	127.846	164.853	173.117	159.537	155.324	130.955	222.857	264.775	167.557	160.859	161.902	189.767	118.758
TKOv3_39412	NEU2	339.041	288.883	206.79	286.277	195.389	336.401	213.107	255.155	342.306	402.482	284.445	361.958	424.507	302.294
TKOv3_44834	PEX3	83.4562	106.948	60.7355	76.0027	71.7022	117.499	90.2856	66.2112	73.1424	91.5516	77.4868	47.4362	86.6565	79.622
TKOv3_35633	MECOM	160.951	132.763	246.557	86.9809	139.819	158.543	159.423	247.081	187.244	148.555	142.223	136.121	172.216	226.72
TKOv3_51291	RNASE1	416.536	382.309	428.763	548.064	370.163	374.226	302.579	308.447	383.266	430.12	387.434	311.429	338.948	296.895
TKOv3_35502	MCM9	150.519	197.915	185.822	163.828	150.575	127.961	174.064	140.497	177.005	188.285	117.701	83.5289	70.2027	86.3696
TKOv3_15629	DAB2IP	308.49	281.507	500.344	330.19	473.235	452.29	509.178	484.472	452.02	471.577	360.951	417.644	456.318	252.361
TKOv3_15169	CXCR5	128.165	162.266	103.395	158.761	129.064	74.8451	129.328	111.429	188.707	119.19	88.2761	145.402	149.181	68.8258
TKOv3_25790	GRIN2D	400.888	385.996	501.067	377.48	471.442	478.848	483.963	438.448	318.901	490.578	308.966	428.988	465.093	408.906
TKOv3_33590	LRP10	230.25	318.386	278.371	243.209	258.128	200.392	320.473	154.224	258.924	259.108	300.139	187.682	165.635	159.244
TKOv3_53857	SERINC4	183.305	202.832	261.018	119.071	224.069	263.165	342.434	274.534	222.353	179.648	238.346	192.838	265.454	294.196
TKOv3_01600	AGO3	193.738	173.33	198.113	168.895	198.077	182.686	135.835	98.5094	166.765	162.375	115.74	154.683	141.502	126.855
TKOv3_61465	TLE3	186.286	194.227	267.525	238.986	192.7	136.009	143.156	209.938	244.296	229.743	202.054	288.742	285.199	175.438
TKOv3_04825	ATP7A	222.798	217.584	334.768	315.834	221.381	330.767	245.642	306.025	213.576	155.465	231.48	183.557	183.185	213.225
TKOv3_51298	RNASE11	237.701	298.717	347.783	267.699	339.689	324.329	261.096	440.87	463.723	354.115	287.388	375.364	450.833	338.731
TKOv3_69527	ZNF512B	534.268	531.052	759.916	764.25	881.937	819.272	611.664	849.442	612.933	544.127	557.12	629.045	615.371	609.985
TKOv3_28339	ICT1	370.337	357.723	290.663	307.389	362.096	358.13	227.747	377.081	349.621	371.389	350.162	590.889	346.626	464.237
TKOv3_27172	HIST1H3I	210.131	130.305	96.8875	101.337	169.396	171.419	169.997	171.18	140.433	160.647	118.682	121.684	167.828	78.2724
TKOv3_18787	EIF2D	201.189	205.291	232.819	176.495	216.899	156.933	189.518	166.336	147.748	171.011	167.725	187.682	185.379	192.982
TKOv3_35439	MCF2L	362.14	381.079	355.736	466.15	311.905	441.023	497.791	390.808	389.117	570.038	540.446	568.203	448.639	522.266
TKOv3_48955	PTPRR	269.742	319.615	351.398	243.209	263.506	273.627	361.956	417.454	220.89	386.935	356.047	377.427	286.296	310.391
TKOv3_46073	PLEKHD1	479.128	448.69	554.573	376.636	536.87	421.708	479.896	365.777	409.597	533.763	359.97	474.362	387.212	346.828
TKOv3_58822	STK4	153.5	116.782	108.456	185.784	99.4868	204.416	172.437	210.745	133.119	150.283	211.863	121.684	138.212	132.253
TKOv3_35666	MED13	155.735	181.935	312.354	200.985	365.681	333.986	235.881	256.77	219.427	212.469	215.786	215.525	257.776	203.778
TKOv3_16024	DDA1	325.628	311.01	429.486	288.81	358.511	456.314	341.621	317.329	346.695	404.209	295.235	384.645	278.617	387.314
TKOv3_03430	ARFGEF2	275.703	286.424	180.76	151.161	342.378	237.412	279.804	239.814	411.06	297.111	337.411	342.365	312.622	259.109
TKOv3_19200	EML6	131.891	172.1	154.008	109.782	101.279	113.475	74.0179	90.4348	169.69	136.464	167.725	100.028	128.339	172.739
TKOv3_02983	AP2M1	239.191	200.374	12.2917	27.0232	49.2953	23.3388	26.8417	22.6087	59.9767	63.9134	51.9848	52.5923	43.8767	35.0876
TKOv3_09989	CCDC18	196.718	188.081	162.684	250.809	168.5	318.695	244.828	249.503	157.988	165.829	145.165	161.902	196.348	167.341
TKOv3_37775	MTMR1	264.526	255.692	327.538	240.675	252.75	313.062	306.646	327.826	364.249	331.659	341.334	315.554	281.908	317.138
TKOv3_67951	ZBTB44	195.973	181.935	158.346	175.651	211.521	322.719	178.944	181.677	127.268	191.74	123.587	241.306	191.961	194.332
TKOv3_53662	SEMA3G	171.383	196.686	152.562	157.917	103.072	187.515	174.064	106.584	206.261	122.645	117.701	216.556	167.828	147.098
TKOv3_02077	ALDOB	122.949	229.877	146.777	137.649	174.774	148.081	145.596	117.081	108.251	243.562	171.648	157.777	194.154	141.7
TKOv3_05005	AVPR1B	191.502	153.661	126.532	198.452	97.6943	164.981	123.634	163.106	112.639	193.468	172.629	149.527	195.251	130.904
TKOv3_45572	PINLYP	182.56	177.017	159.069	108.093	95.9017	136.814	91.9123	120.311	190.17	95.0064	136.338	159.839	201.833	141.7
TKOv3_40700	NSMCE2	201.934	178.247	159.069	165.517	141.612	238.217	117.127	133.23	112.639	162.375	146.146	122.715	78.9781	125.506
TKOv3_63182	TOMM34	272.723	279.048	285.601	149.472	162.226	198.782	214.733	125.155	302.809	302.293	247.173	252.649	256.679	246.963
TKOv3_31252	KIAA1731	315.196	264.297	187.991	238.142	239.306	226.145	285.498	194.596	248.684	233.197	251.097	245.431	306.04	209.176
TKOv3_28782	IGSF6	110.281	113.094	204.621	162.139	183.737	126.351	251.336	147.764	160.913	107.098	145.165	76.3103	84.4627	76.9229
TKOv3_24464	GLIPR1	293.587	283.965	255.234	246.587	369.266	246.265	242.388	369.814	285.255	347.205	285.426	311.429	246.807	349.527
TKOv3_48806	PTPDC1	352.453	254.463	214.743	249.12	234.825	273.627	292.818	359.317	185.782	222.833	288.369	211.4	128.339	198.38
TKOv3_12800	CLEC2D	131.145	142.597	176.422	139.338	197.181	68.4068	131.768	268.075	117.028	174.466	203.035	202.119	153.568	183.535
TKOv3_63186	TOMM40	333.825	424.104	292.832	382.547	328.038	354.106	196.839	197.826	318.901	466.395	344.277	350.615	335.657	365.721
TKOv3_28679	IGFBP3	295.822	236.023	228.481	244.053	346.859	131.18	211.48	272.919	231.13	202.104	199.112	296.992	341.141	276.653
TKOv3_47206	PPP1R16A	270.487	258.15	182.206	211.119	235.721	184.296	264.35	204.286	200.41	212.469	212.844	178.401	175.507	199.73
TKOv3_54972	SLC10A6	453.793	481.881	506.852	572.554	519.841	487.7	511.618	451.367	560.271	551.037	622.837	580.577	458.512	581.645
TKOv3_42244	OR51B4	336.06	331.908	507.575	504.152	422.147	535.183	496.164	673.417	389.117	352.387	456.093	446.519	405.86	377.867
TKOv3_13486	COG7	300.293	367.557	314.523	402.815	312.801	325.134	342.434	362.547	329.141	333.386	360.951	332.053	317.009	336.032
TKOv3_69544	ZNF517	207.895	210.208	248.726	252.498	196.285	214.878	235.068	260	299.884	228.015	321.717	207.275	247.903	284.75
TKOv3_37472	MS4A3	313.706	240.94	229.204	255.876	286.809	237.412	348.128	302.795	269.164	250.471	393.319	251.618	324.688	352.226
TKOv3_40328	NPHS1	342.021	414.27	318.861	328.501	301.149	310.647	300.952	572.485	421.3	274.655	327.603	384.645	485.935	333.333
TKOv3_49666	RAD51AP1	190.757	212.667	165.576	168.895	121.894	124.742	135.835	128.385	213.576	141.646	116.721	100.028	126.146	39.1362
TKOv3_64993	TXNRD2	294.332	255.692	302.954	88.6699	172.085	296.966	151.289	222.857	119.953	171.011	255.02	187.682	166.732	273.954
TKOv3_08972	CACNA2D3	137.852	206.52	93.2723	97.9591	104.864	93.3552	148.036	183.292	122.879	126.099	153.993	174.276	154.665	152.496
TKOv3_29885	ITGAV	94.6333	98.343	57.8433	11.8226	18.8218	18.5101	22.7747	58.1367	42.4226	25.9108	34.3296	45.3737	29.6168	33.7381
TKOv3_28308	ICAM3	216.837	226.189	295.001	252.498	294.875	226.95	138.275	152.609	217.964	160.647	233.441	162.933	252.291	226.72
TKOv3_13471	COG4	277.194	275.36	221.974	256.72	268.883	136.009	238.321	275.342	299.884	285.019	173.61	272.242	332.366	159.244
TKOv3_45327	PI4KB	229.504	283.965	22.4143	26.1787	15.2367	35.4106	39.8558	36.3354	83.3823	58.7312	74.5443	64.9669	28.5199	51.2819
TKOv3_28542	IFNE	219.072	210.208	263.91	409.57	337	346.058	377.41	322.982	292.569	222.833	230.499	308.335	352.111	256.41
TKOv3_57021	SNRNP48	286.135	323.303	214.743	242.364	180.152	232.583	205.786	142.919	159.45	240.107	168.705	164.995	170.022	253.711
TKOv3_54880	SKIDA1	213.111	244.628	229.927	158.761	276.053	169.005	270.857	257.578	220.89	241.834	187.342	230.993	177.701	278.002
TKOv3_69680	ZNF564	85.6916	95.8845	150.393	151.161	124.583	187.515	162.677	156.646	136.045	165.829	153.012	127.871	120.661	99.8648
TKOv3_17233	DNAJC14	295.077	345.43	166.299	289.655	192.7	204.416	244.828	188.944	200.41	266.018	208.92	180.464	198.542	226.72
TKOv3_14188	CPXM1	245.152	253.233	412.856	471.217	386.296	358.13	262.723	328.634	304.272	321.294	419.802	292.867	307.137	364.372
TKOv3_34207	LY75	227.269	233.565	266.079	253.342	224.966	313.867	423.773	329.441	228.204	217.651	215.786	255.743	281.908	233.468
TKOv3_14527	CRYZ	167.657	189.31	205.344	192.54	189.115	215.683	218.8	154.224	108.251	138.191	138.299	160.87	209.511	151.147
TKOv3_26053	GTF2A2	99.8493	133.992	22.4143	42.2237	24.1995	16.9005	41.4826	26.646	16.0913	31.093	20.5978	37.1239	26.326	6.74762
TKOv3_45878	PLAC1	236.956	181.935	176.422	170.584	190.907	178.663	194.399	97.7019	223.816	264.29	267.771	245.431	218.287	237.516
TKOv3_47424	PPP6R3	113.262	119.241	148.946	178.184	111.138	206.83	277.364	251.118	133.119	181.376	147.127	196.963	134.921	187.584
TKOv3_03941	ARPC1B	163.187	132.763	191.606	230.542	169.396	102.208	114.687	102.547	203.336	164.102	225.595	158.808	137.115	132.253
TKOv3_60729	TET2	151.264	141.368	172.807	178.184	181.048	171.419	178.944	205.901	177.005	129.554	150.069	214.494	195.251	190.283
TKOv3_21105	FAM32A	75.2596	93.4259	89.6571	112.315	42.125	104.622	96.7926	107.391	171.153	112.28	113.778	124.778	157.956	133.603
TKOv3_03993	ARRDC3	204.915	258.15	243.665	315.834	241.995	296.161	222.054	247.081	320.364	241.834	256.001	296.992	293.974	215.924
TKOv3_07578	C1orf189	184.796	205.291	201.005	187.473	259.024	284.09	150.476	254.348	217.964	215.924	127.51	214.494	150.278	251.012
TKOv3_51266	RMDN3	125.184	131.534	107.01	88.6699	127.271	93.3552	152.916	83.1678	150.673	157.192	151.05	245.431	180.991	176.788
TKOv3_36693	MN1	68.5533	33.1908	28.1986	59.9577	34.0585	92.5504	52.8699	76.7081	57.0511	43.1847	60.8124	34.0303	25.2291	68.8258
TKOv3_35642	MECR	178.089	172.1	53.505	119.071	53.7767	63.5781	91.9123	48.4472	128.731	124.372	139.28	106.216	107.498	117.409
TKOv3_53382	SDE2	122.204	156.12	0	19.4229	3.58511	0.804786	5.69369	0.807454	10.2399	1.72739	0	1.03122	4.38767	8.09715
TKOv3_15750	DBF4B	425.477	389.684	264.633	253.342	220.484	265.579	242.388	269.69	332.066	271.2	389.396	383.614	341.141	372.469
TKOv3_41284	OCEL1	118.478	88.5087	82.4267	123.293	65.4283	106.232	100.86	100.932	64.3653	63.9134	41.1955	90.7474	53.749	43.1848
TKOv3_25576	GPRIN2	215.347	165.954	296.447	325.967	220.484	263.97	361.142	441.677	282.33	203.832	237.365	294.929	290.683	226.72
TKOv3_46030	PLEK2	99.8493	94.6552	114.24	150.317	63.6357	104.622	72.3911	104.969	108.251	124.372	86.3144	114.466	146.987	51.2819
TKOv3_25398	GPR21	192.992	109.407	225.589	190.007	198.974	188.32	202.533	278.572	146.285	162.375	151.05	205.213	140.405	199.73
TKOv3_67185	WFDC8	127.42	116.782	123.64	86.9809	107.553	114.28	104.113	142.919	134.582	120.917	87.2953	100.028	57.0397	72.8743
TKOv3_48341	PSEN1	163.932	165.954	185.099	183.251	161.33	164.176	214.733	206.708	187.244	172.739	206.958	213.463	191.961	145.749
TKOv3_38976	NCR2	141.577	118.012	50.6129	85.292	124.583	43.4585	87.8454	41.1802	111.176	57.0038	115.74	94.8723	68.0089	91.7677
TKOv3_01127	ADAMTS5	245.152	256.921	527.82	361.435	302.942	337.205	382.29	375.466	452.02	307.475	276.599	350.615	332.366	360.323
TKOv3_33808	LRRC4B	326.373	322.073	418.641	492.329	736.74	453.899	431.093	474.783	472.5	454.303	398.223	412.488	485.935	330.634
TKOv3_60707	TES	197.463	197.915	260.295	219.563	216.003	271.213	204.159	177.64	181.393	198.65	152.031	102.091	82.2688	172.739
TKOv3_11632	CELF4	101.34	113.094	114.24	214.497	119.205	206.025	184.638	149.379	137.508	153.738	174.591	147.465	153.568	176.788
TKOv3_57345	SOSTDC1	356.179	333.137	334.045	435.749	395.258	440.218	361.956	436.833	396.432	437.029	445.304	352.678	358.692	404.857
TKOv3_69158	ZNF337	190.012	188.081	219.804	211.963	222.277	285.699	275.737	239.006	250.147	210.741	210.882	234.087	168.925	209.176
TKOv3_59454	SYNPO2	177.344	210.208	143.162	291.344	197.181	202.806	213.107	241.429	206.261	169.284	195.188	196.963	171.119	184.885
TKOv3_17023	DMRT1	293.587	226.189	337.66	333.568	400.636	394.345	593.77	245.466	314.512	354.115	322.698	365.052	284.102	357.624
TKOv3_63047	TNMD	248.878	286.424	234.988	445.883	216.899	286.504	189.518	199.441	216.501	143.373	234.422	177.37	274.229	221.322
TKOv3_09293	CAPN14	140.087	119.241	129.424	216.186	174.774	133.595	161.05	110.621	93.6222	93.279	92.1995	73.2167	92.1411	80.9715
TKOv3_43181	OXTR	230.995	228.648	403.457	481.351	372.851	198.782	274.11	305.218	168.227	209.014	274.637	280.492	233.643	233.468
TKOv3_17264	DNAJC22	131.891	152.432	62.1815	62.4911	49.2953	89.3313	41.4826	112.236	114.102	114.008	121.625	88.685	75.6873	101.214
TKOv3_07840	C21orf67	168.403	173.33	239.327	232.231	181.048	259.946	286.311	204.286	185.782	153.738	251.097	180.464	221.577	194.332
TKOv3_30629	KCNK7	266.762	275.36	237.157	188.318	201.662	156.933	154.543	186.522	273.552	376.571	316.813	342.365	206.221	353.576
TKOv3_10589	CCT2	196.718	192.998	55.6742	38.0014	14.3404	16.9005	30.0952	29.8758	35.1083	15.5465	30.4062	13.4059	18.6476	32.3886
TKOv3_47997	PRPF39	43.9635	77.4451	10.8456	38.8458	16.133	12.8766	10.574	2.42236	27.7941	38.0026	52.9657	39.1864	25.2291	47.2334
TKOv3_48447	PSMC1	186.286	331.908	145.331	48.1351	90.524	40.2393	37.4156	18.5714	51.1997	24.1834	61.7933	46.4049	72.3966	70.1753
TKOv3_27461	HNRNPH1	109.536	110.636	68.6889	26.1787	78.8724	74.0403	64.2573	5.65218	78.9938	57.0038	73.5634	26.8117	57.0397	68.8258
TKOv3_09549	CATSPER1	178.835	231.106	125.086	124.138	135.338	45.8728	128.515	84.7827	106.788	133.009	154.974	134.059	109.692	171.39
TKOv3_48702	PTGER4	147.539	179.476	115.687	72.6248	122.79	124.742	192.772	87.205	102.399	136.464	146.146	210.369	165.635	148.448
TKOv3_65932	USP2	232.485	281.507	146.777	228.853	281.431	201.197	199.279	175.218	320.364	214.196	305.043	228.931	427.798	259.109
TKOv3_55283	SLC22A25	321.157	301.176	138.824	261.787	311.008	208.44	156.17	197.019	207.724	221.106	245.211	181.495	186.476	186.234
TKOv3_36296	MID1IP1	331.589	308.551	108.456	88.6699	117.412	143.252	80.525	54.9069	204.799	139.918	161.84	166.027	219.384	202.429
TKOv3_00703	ACP2	116.988	82.3623	95.4414	45.6016	79.7687	87.7217	88.6588	81.5529	90.6965	153.738	70.6209	120.653	81.1719	85.0201
TKOv3_34597	MAGEB16	271.233	325.761	260.295	278.677	291.29	310.647	296.072	404.534	390.58	326.476	303.081	325.866	349.917	263.157
TKOv3_12121	CHEK2	321.157	270.443	314.523	312.456	459.79	423.318	482.336	256.77	295.495	340.296	362.913	313.491	437.67	387.314
TKOv3_29522	IPO8	255.584	265.526	322.476	304.855	354.926	290.528	360.329	298.758	264.775	295.383	257.962	177.37	198.542	314.439
TKOv3_35888	MEST	154.99	199.145	129.424	128.36	228.551	135.204	163.49	212.36	193.096	93.279	166.744	111.372	122.855	132.253
TKOv3_07766	C20orf197	233.23	238.482	237.881	258.409	238.41	234.193	293.631	211.553	196.022	186.558	223.633	152.621	204.027	292.847
TKOv3_47924	PROKR1	284.645	272.902	215.466	143.561	202.559	286.504	371.716	186.522	258.924	286.747	344.277	276.367	290.683	290.148
TKOv3_10564	CCRL2	173.619	195.457	95.4414	111.471	95.0054	111.865	142.342	110.621	100.936	139.918	158.897	148.496	84.4627	178.137
TKOv3_32338	LAD1	175.854	204.062	156.9	153.694	279.639	123.937	187.892	199.441	125.805	141.646	144.184	153.652	185.379	160.593
TKOv3_21522	FAT1	212.366	178.247	210.405	275.299	142.508	298.576	195.212	190.559	253.073	164.102	237.365	241.306	188.67	194.332
TKOv3_43248	P4HA1	196.718	207.75	141.716	286.277	113.827	116.694	217.987	285.839	130.193	70.8229	108.874	115.497	128.339	124.156
TKOv3_60320	TCEAL4	409.829	432.709	402.734	374.947	651.594	467.581	407.505	658.882	604.156	355.842	335.449	319.678	391.6	287.449
TKOv3_59691	TAF11	58.8664	71.2987	42.6594	10.9782	14.3404	17.7053	21.148	29.0683	64.3653	29.3656	57.8699	54.6547	59.2336	64.7772
TKOv3_11011	CDC25A	195.228	204.062	117.856	159.606	153.263	198.782	168.37	171.18	190.17	202.104	201.073	147.465	140.405	141.7
TKOv3_28867	IL12B	213.111	162.266	214.743	253.342	231.24	257.532	207.413	319.752	220.89	143.373	192.246	153.652	201.833	136.302
TKOv3_15475	CYP2W1	444.106	453.607	511.913	450.105	323.556	419.294	548.221	482.05	418.374	418.028	353.104	437.238	491.419	456.139
TKOv3_00822	ACTBL2	331.589	309.781	326.092	459.394	466.961	415.27	315.593	280.187	317.438	283.292	327.603	253.68	322.494	317.138
TKOv3_05398	BBS4	239.191	224.96	195.944	230.542	175.67	230.169	287.938	236.584	275.015	215.924	233.441	253.68	366.371	253.711
TKOv3_54231	SFXN2	314.451	336.825	211.851	135.116	186.426	272.018	227.747	256.77	194.559	145.101	208.92	131.996	180.991	215.924
TKOv3_07380	C1D	185.541	223.73	47.7207	44.7572	72.5985	59.5542	30.9086	104.162	119.953	122.645	122.606	129.934	155.762	152.496
TKOv3_07005	C16orf13	302.529	357.723	113.517	87.8254	190.011	99.7935	142.342	121.118	220.89	193.468	171.648	170.151	202.93	182.186
TKOv3_36773	MOG	275.703	202.832	280.54	300.633	385.399	331.572	198.466	199.441	201.873	297.111	242.269	292.867	253.388	288.798
TKOv3_19991	EVI2A	280.919	229.877	417.918	432.371	422.147	391.126	334.301	492.547	326.215	312.657	326.622	355.771	317.009	290.148
TKOv3_55553	SLC26A6	177.344	110.636	223.42	294.722	267.091	172.224	202.533	142.112	108.251	105.371	102.008	88.685	85.5596	118.758
TKOv3_25717	GRHL2	225.034	271.673	253.787	137.649	159.537	111.865	198.466	150.994	193.096	228.015	248.154	219.65	121.758	228.07
TKOv3_41089	NUP88	181.07	200.374	112.794	197.607	93.2129	123.937	88.6588	160.683	46.8111	67.3682	89.257	107.247	40.586	87.7191
TKOv3_04425	ATF7IP2	68.5533	66.3815	80.9806	79.3806	131.753	103.817	84.5919	92.0498	124.342	77.7325	84.3527	93.8411	94.3349	93.1172
TKOv3_47397	PPP4R1L	231.74	275.36	150.393	305.7	237.514	325.134	463.629	194.596	282.33	264.29	292.292	299.054	345.529	300.944
TKOv3_36222	MGST2	384.494	383.538	347.06	467.839	436.487	410.441	521.379	469.131	413.986	291.929	310.928	311.429	443.155	304.993
TKOv3_01016	ADAM20	178.089	196.686	251.618	285.433	248.269	264.775	250.522	293.913	212.113	203.832	204.016	255.743	197.445	244.264
TKOv3_44032	PCDHB7	245.152	199.145	314.523	265.165	277.846	272.018	173.251	220.435	196.022	190.013	221.671	256.774	188.67	164.642
TKOv3_13781	COPS3	281.665	338.054	112.071	119.915	129.064	116.694	49.6164	104.162	169.69	188.285	198.131	183.557	200.736	286.099
TKOv3_62371	TMEM254	448.577	374.933	440.332	423.082	388.984	293.747	425.4	373.851	406.672	369.661	330.545	438.269	410.247	306.342
TKOv3_57424	SOX6	168.403	205.291	170.638	325.967	228.551	158.543	182.198	250.311	194.559	177.921	170.667	233.056	179.895	201.079
TKOv3_06866	C14orf164	156.48	165.954	99.0566	122.449	90.524	177.053	142.342	107.391	140.433	127.827	198.131	108.278	129.436	201.079
TKOv3_00367	ABHD4	176.599	148.744	179.314	222.941	169.396	261.555	125.261	143.727	215.039	205.559	129.472	129.934	231.45	222.672
TKOv3_13691	COLGALT2	164.677	197.915	99.7797	121.604	172.085	159.348	156.983	171.988	191.633	139.918	128.491	163.964	116.273	143.05
TKOv3_62716	TMOD1	157.971	159.807	173.53	166.362	173.878	252.703	173.251	170.373	147.748	165.829	134.376	107.247	198.542	156.545
TKOv3_07064	C16orf80	96.1236	81.133	30.3677	28.7121	30.4734	38.6297	29.2818	41.9876	74.6052	62.186	61.7933	72.1855	155.762	93.1172
TKOv3_07547	C1orf170	208.64	173.33	80.9806	83.603	97.6943	119.108	110.62	64.5963	157.988	120.917	104.951	112.403	100.916	97.1658
TKOv3_20391	FAM106A	186.286	231.106	72.3041	119.071	76.1836	66.7973	82.1517	52.4845	67.291	148.555	123.587	174.276	178.798	157.894
TKOv3_42577	OR5T2	426.223	370.016	571.202	765.094	487.575	618.881	444.921	650.808	490.054	566.584	468.844	519.735	511.164	485.829
TKOv3_46043	PLEKHA4	296.567	250.775	519.867	407.881	399.74	411.246	476.643	379.503	337.918	347.205	370.76	268.117	349.917	357.624
TKOv3_50292	RBM48	333.825	301.176	338.383	436.594	435.591	292.942	359.516	313.292	200.41	215.924	256.001	225.837	261.066	190.283
TKOv3_54141	SF3B3	181.815	347.888	21.6912	44.7572	12.5479	66.7973	108.18	46.0249	13.1656	29.3656	31.3871	29.9054	12.0661	25.641
TKOv3_34493	MACROD1	54.3955	100.802	103.395	29.5566	60.0506	48.2872	27.655	32.2982	73.1424	148.555	66.6975	116.528	104.207	60.7286
TKOv3_25317	GPR152	234.72	224.96	330.43	369.88	405.117	431.365	334.301	318.137	462.26	347.205	374.683	406.301	409.15	395.411
TKOv3_32508	LASP1	197.463	254.463	178.591	152.85	177.463	266.384	249.709	138.882	191.633	157.192	222.652	190.776	144.793	309.041
TKOv3_69047	ZNF282	210.131	208.979	248.726	190.851	272.468	239.021	239.135	193.789	175.542	195.195	167.725	238.212	195.251	217.274
TKOv3_08038	C2orf82	213.856	191.769	283.432	385.925	310.112	286.504	305.019	291.491	261.85	319.567	313.871	262.961	190.864	330.634
TKOv3_68807	ZNF185	217.582	199.145	316.692	138.494	219.588	232.583	236.695	237.391	215.039	243.562	275.618	213.463	199.639	245.614
TKOv3_03759	ARL11	187.031	165.954	107.733	119.915	137.13	103.817	158.61	78.323	138.971	117.462	131.433	74.2479	71.2997	117.409
TKOv3_35432	MCEE	235.466	256.921	208.959	191.696	230.343	121.523	165.93	234.969	226.741	274.655	170.667	180.464	196.348	163.293
TKOv3_49958	RASA3	400.142	347.888	440.332	458.55	527.011	593.932	503.484	495.777	367.175	412.846	379.587	447.55	409.15	399.459
TKOv3_48273	PRSS57	122.204	108.177	16.6299	44.7572	73.4948	98.1839	39.8558	26.646	93.6222	150.283	152.031	181.495	131.63	175.438
TKOv3_42948	OSBPL7	214.602	226.189	31.0908	78.5362	18.8218	134.399	52.0565	43.6025	103.862	133.009	121.625	180.464	172.216	101.214
TKOv3_63083	TNNT3	381.514	433.939	677.49	459.394	644.424	568.984	626.305	494.162	539.791	602.859	677.764	604.295	586.851	608.636
TKOv3_46761	POM121L2	353.198	341.742	208.959	373.258	292.186	288.918	298.512	330.249	409.597	418.028	420.783	309.366	380.63	385.964
TKOv3_64820	TUBG1	145.303	248.316	3.61521	6.7558	6.27394	9.65743	0	7.26709	10.2399	6.90956	11.7701	13.4059	18.6476	14.8448
TKOv3_30498	KCNH8	276.449	299.946	485.884	501.618	352.237	425.732	287.938	459.441	390.58	345.478	422.745	326.897	321.397	383.265
TKOv3_29142	IL5RA	223.543	227.418	290.663	307.389	223.173	292.137	248.895	302.795	313.049	234.925	282.484	212.431	245.71	265.856
TKOv3_42683	OR6P1	278.684	285.195	281.986	240.675	281.431	337.205	271.67	332.671	272.09	209.014	307.986	226.869	220.48	338.731
TKOv3_30051	IWS1	107.301	103.26	122.194	69.2469	54.6729	123.937	82.9651	75.9007	105.325	82.9147	75.5251	74.2479	146.987	76.9229
TKOv3_24260	GINS3	336.805	314.698	97.6105	59.9577	66.3245	126.351	83.7785	71.056	160.913	89.8242	74.5443	57.7484	144.793	44.5343
TKOv3_13670	COLCA1	214.602	146.285	268.971	236.453	214.21	296.161	264.35	343.975	160.913	169.284	257.962	188.713	162.344	198.38
TKOv3_58808	STK36	401.633	462.212	375.258	309.078	276.053	336.401	445.734	310.062	361.323	307.475	313.871	272.242	381.727	340.08
TKOv3_64808	TUBB8	210.131	175.788	234.988	189.162	238.41	318.695	199.279	163.106	247.221	267.745	237.365	326.897	219.384	219.973
TKOv3_27363	HMGXB3	137.852	179.476	156.9	92.8922	125.479	155.324	204.159	114.658	128.731	79.4599	99.0654	118.59	102.013	171.39
TKOv3_55258	SLC22A17	213.856	215.125	83.1497	124.982	172.085	214.878	200.092	168.758	152.136	228.015	220.69	281.523	213.899	210.526
TKOv3_53335	SCYL1	237.701	266.755	97.6105	123.293	151.471	104.622	183.825	79.9379	162.376	169.284	173.61	160.87	190.864	144.399
TKOv3_43992	PCDHB12	120.713	151.202	231.373	181.562	273.365	226.145	185.451	135.652	127.268	146.828	193.227	144.371	97.6257	153.846
TKOv3_63488	TPSG1	119.968	132.763	214.743	175.651	172.982	106.232	98.4194	56.5218	185.782	222.833	198.131	214.494	188.67	230.769
TKOv3_00200	ABCB8	46.1989	31.9615	53.505	13.5116	64.532	33.801	46.3629	62.174	43.8854	43.1847	46.0998	42.2801	32.9075	62.0781
TKOv3_25390	GPR19	283.9	227.418	164.13	131.738	207.936	200.392	155.356	208.323	68.7538	136.464	141.242	116.528	99.8195	160.593
TKOv3_03199	APOBEC3D	350.963	408.124	501.791	338.634	557.485	430.561	479.896	482.857	427.151	516.489	508.078	494.986	524.327	431.848
TKOv3_44448	PDE7B	138.597	116.782	266.802	363.124	237.514	196.368	231.001	223.665	179.93	157.192	145.165	170.151	183.185	110.661
TKOv3_10454	CCNF	279.429	283.965	321.03	239.831	219.588	207.635	274.11	205.901	277.941	215.924	291.311	223.775	256.679	233.468
TKOv3_37594	MSRB2	275.703	295.029	488.053	416.326	426.628	512.649	383.104	345.59	481.277	328.204	386.453	340.303	377.34	408.906
TKOv3_23702	GATA2	72.279	28.2736	39.7673	57.4243	70.8059	55.5302	87.8454	78.323	45.3483	67.3682	58.8507	96.9348	34.0045	118.758
TKOv3_68044	ZC3H14	121.459	131.534	172.807	190.851	164.019	226.95	129.328	257.578	191.633	134.736	157.916	182.526	176.604	178.137
TKOv3_19125	EMC3	294.332	238.482	422.256	433.216	591.543	458.728	343.248	367.392	523.699	494.033	389.396	444.456	498.001	371.119
TKOv3_53164	SCLT1	218.327	233.565	261.741	384.236	267.987	199.587	281.431	194.596	223.816	271.2	274.637	225.837	182.088	260.458
TKOv3_67068	WDR76	250.368	263.068	216.912	182.407	244.684	322.719	375.783	209.131	305.735	323.022	250.116	303.179	295.071	268.555
TKOv3_03195	APOBEC3C	114.752	95.8845	91.1032	118.226	133.545	119.913	143.969	131.615	74.6052	65.6408	119.663	82.4977	96.5288	112.011
TKOv3_12517	CIRH1A	163.932	195.457	37.5981	80.2251	11.6516	24.9484	35.7889	75.9007	51.1997	46.6395	37.2721	35.0615	52.6521	71.5248
TKOv3_25587	GPS2	152.755	154.89	78.8115	78.5362	57.3618	101.403	102.486	96.8945	121.416	112.28	161.84	133.027	132.727	202.429
TKOv3_58080	SPTLC2	148.284	164.725	20.2452	16.045	32.266	13.6814	2.44015	13.7267	130.193	57.0038	68.6592	52.5923	65.8151	63.4277
TKOv3_52664	S100A4	195.973	254.463	148.223	192.54	115.62	176.248	98.4194	226.087	255.998	184.831	174.591	185.62	118.467	140.351
TKOv3_35776	MEF2BNB	243.662	295.029	112.794	108.093	151.471	274.432	280.617	157.454	310.124	214.196	167.725	168.089	231.45	156.545
TKOv3_01605	AGO4	200.444	233.565	236.434	218.719	177.463	229.364	213.92	220.435	171.153	188.285	206.958	232.025	130.533	214.574
TKOv3_69125	ZNF324	212.366	212.667	171.361	109.782	184.633	110.256	216.36	159.068	162.376	133.009	112.797	211.4	139.309	192.982
TKOv3_36311	MIEF2	305.509	279.048	307.292	183.251	256.335	201.197	233.441	272.919	241.37	361.024	307.986	331.022	349.917	388.663
TKOv3_16993	DMBX1	219.818	250.775	149.67	226.319	195.389	189.125	233.441	138.075	185.782	172.739	144.184	147.465	133.824	101.214
TKOv3_27728	HPD	245.152	297.488	151.116	107.248	156.849	107.841	54.4967	71.8634	196.022	174.466	138.299	134.059	134.921	148.448
TKOv3_24854	GNMT	501.482	513.842	345.614	388.458	344.171	296.161	374.97	404.534	397.895	437.029	528.676	488.799	311.525	443.994
TKOv3_26004	GSTM3	163.932	164.725	129.424	78.5362	167.604	153.714	114.687	80.7454	125.805	115.735	108.874	124.778	150.278	93.1172
TKOv3_66494	VPS16	146.793	168.412	71.5811	96.2701	98.5905	140.838	82.1517	77.5156	166.765	164.102	113.778	112.403	75.6873	116.059
TKOv3_36439	MKRN2	366.611	374.933	268.971	228.853	263.506	157.738	252.149	253.541	362.786	328.204	341.334	278.43	278.617	249.662
TKOv3_11542	CEACAM5	397.907	315.927	371.643	377.48	380.022	454.704	326.167	259.193	321.826	245.289	343.296	311.429	399.278	372.469
TKOv3_30723	KCNV2	296.567	314.698	435.994	332.723	269.78	395.955	448.174	234.162	242.833	248.744	311.909	331.022	164.538	240.215
TKOv3_42611	OR6C2	359.905	288.883	441.055	434.905	534.181	577.836	476.643	520.808	299.884	302.293	319.756	356.802	284.102	326.585
TKOv3_00398	ABL1	328.609	330.678	292.832	282.899	377.333	347.668	284.684	323.789	342.306	421.483	486.5	355.771	322.494	353.576
TKOv3_50285	RBM46	225.779	174.559	208.236	266.01	271.572	470.8	147.222	229.317	253.073	222.833	264.828	291.835	269.842	273.954
TKOv3_18031	DUSP5	479.873	413.041	467.808	547.22	386.296	761.328	703.577	706.522	564.659	604.586	563.986	651.732	571.494	581.645
TKOv3_16946	DLL1	155.735	145.056	148.223	102.181	159.537	119.913	241.575	109.814	90.6965	81.1873	92.1995	111.372	112.983	124.156
TKOv3_19894	ETAA1	52.9052	74.9866	75.1963	92.8922	53.7767	30.5819	52.8699	117.888	55.5882	38.0026	85.3336	43.3113	48.2644	62.0781
TKOv3_60136	TBC1D9	190.757	174.559	257.403	190.007	225.862	233.388	200.906	205.093	175.542	169.284	179.495	163.964	188.67	152.496
TKOv3_65671	UNC45A	277.194	296.258	27.4756	92.0478	25.0958	41.0441	71.5778	80.7454	124.342	133.009	199.112	157.777	125.049	210.526
TKOv3_09057	CADPS	382.259	425.334	618.2	537.931	483.094	482.067	446.548	447.33	614.396	659.863	501.212	583.671	730.547	506.072
TKOv3_27433	HNRNPA0	99.1042	93.4259	52.059	59.9577	26.8883	74.8451	16.2677	26.646	61.4396	82.9147	64.7358	62.9045	64.7182	101.214
TKOv3_42119	OR4C5	204.915	213.896	284.878	345.39	211.521	273.627	212.293	174.41	223.816	252.199	217.748	285.648	212.802	228.07
TKOv3_29277	ING2	181.815	116.782	129.424	211.119	184.633	139.228	200.906	133.23	127.268	260.836	137.318	116.528	133.824	101.214
TKOv3_03832	ARL6IP5	132.636	136.451	138.824	235.608	159.537	197.173	183.825	314.1	78.9938	122.645	114.759	76.3103	125.049	62.0781
TKOv3_38941	NCOA3	204.17	159.807	260.295	201.83	211.521	181.882	213.92	121.926	213.576	183.103	169.686	164.995	178.798	141.7
TKOv3_14815	CTDP1	121.459	135.222	105.564	56.5798	110.242	44.2632	61.8172	76.7081	89.2337	183.103	122.606	142.308	107.498	125.506
TKOv3_12377	CHST11	193.738	205.291	123.64	190.007	202.559	168.2	135.022	202.671	206.261	200.377	217.748	169.12	205.124	161.943
TKOv3_03128	APIP	179.58	240.94	294.278	300.633	316.386	257.532	335.114	314.1	289.644	335.113	338.392	273.274	287.392	385.964
TKOv3_15846	DCAF5	175.854	157.349	117.856	219.563	176.567	151.3	211.48	183.292	242.833	203.832	150.069	183.557	222.674	182.186
TKOv3_00332	ABHD14B	140.087	121.699	107.01	146.094	116.516	56.335	64.2573	105.776	98.0108	114.008	149.089	188.713	139.309	149.797
TKOv3_56540	SLX4IP	99.1042	106.948	147.5	183.251	171.189	187.515	128.515	104.969	98.0108	108.825	127.51	138.184	100.916	120.108
TKOv3_41691	OR11H4	183.305	152.432	247.28	146.094	151.471	144.862	244.015	150.994	171.153	172.739	126.529	138.184	183.185	199.73
TKOv3_47573	PRDM7	387.475	354.035	128.701	194.229	183.737	83.6978	193.585	281.801	143.359	145.101	133.395	144.371	141.502	203.778
TKOv3_27916	HSD17B10	130.4	110.636	84.5958	43.9127	92.3166	73.2355	151.289	150.994	166.765	127.827	101.027	151.589	112.983	143.05
TKOv3_02086	ALG1	382.259	357.723	62.9046	206.896	120.101	82.893	122.008	67.8261	184.319	143.373	181.456	148.496	115.176	163.293
TKOv3_06960	C15orf48	346.492	277.819	472.869	476.284	466.961	418.489	440.041	507.889	403.746	319.567	276.599	351.646	571.494	275.303
TKOv3_54223	SFTPD	452.303	443.773	367.305	299.789	361.2	333.181	396.118	458.634	365.712	338.568	406.07	391.864	395.987	504.722
TKOv3_28039	HSPA4	204.915	197.915	234.265	184.94	177.463	201.197	142.342	212.36	198.947	179.648	245.211	213.463	153.568	203.778
TKOv3_06031	BPIFA1	385.24	416.729	468.531	369.88	471.442	387.907	307.459	413.416	289.644	352.387	398.223	325.866	285.199	265.856
TKOv3_18755	EIF2AK2	207.895	258.15	255.234	243.209	168.5	195.563	144.782	197.826	232.593	188.285	229.518	240.274	324.688	326.585
TKOv3_48562	PSMG4	602.822	551.95	169.915	38.8458	83.3538	96.5743	119.567	86.3976	172.616	157.192	114.759	106.216	119.564	109.312
TKOv3_13151	CMTM8	119.223	131.534	73.0272	200.141	141.612	124.742	287.938	156.646	80.4566	124.372	125.548	115.497	60.3305	64.7772
TKOv3_04093	ASAP2	143.068	120.47	201.005	168.895	85.1464	220.511	216.36	135.652	109.714	77.7325	165.763	78.3728	157.956	178.137
TKOv3_61922	TMEM145	76.7499	114.324	145.331	130.049	106.657	119.913	100.046	69.441	133.119	126.099	170.667	154.683	166.732	183.535
TKOv3_19799	ERP27	317.431	287.653	266.802	302.322	310.112	225.34	174.064	193.789	320.364	231.47	358.009	277.398	296.168	349.527
TKOv3_59758	TAF7	132.636	153.661	112.071	140.183	85.1464	177.053	187.892	114.658	111.176	143.373	114.759	157.777	175.507	163.293
TKOv3_60238	TBX15	178.835	197.915	117.856	173.117	123.686	239.021	139.089	176.025	174.079	248.744	200.093	208.307	142.599	229.419
TKOv3_18605	EGFL6	181.815	212.667	286.324	247.431	337.897	172.224	226.121	344.783	337.918	278.11	256.001	266.055	284.102	253.711
TKOv3_23332	GABARAPL1	148.284	114.324	153.285	153.694	181.048	165.786	73.2045	121.926	152.136	136.464	92.1995	104.153	136.018	106.612
TKOv3_44518	PDIA3	327.118	287.653	216.912	300.633	243.787	296.966	405.878	433.603	453.483	278.11	334.468	364.021	439.864	377.867
TKOv3_27576	HOXA4	259.31	281.507	341.998	271.076	169.396	272.018	247.269	269.69	185.782	167.557	236.384	234.087	222.674	188.933
TKOv3_35775	MEF2B	191.502	232.335	73.7502	33.779	79.7687	86.9169	94.3525	17.764	119.953	124.372	198.131	127.871	104.207	139.001
TKOv3_18579	EFR3A	160.951	118.012	252.341	166.362	104.864	288.918	178.944	210.745	92.1594	153.738	170.667	136.121	82.2688	149.797
TKOv3_45432	PIGP	195.228	179.476	186.545	295.566	259.024	112.67	256.216	204.286	247.221	240.107	256.982	214.494	200.736	377.867
TKOv3_01514	AFMID	197.463	236.023	217.635	196.763	151.471	212.464	152.916	189.752	207.724	186.558	219.709	184.589	186.476	207.827
TKOv3_11749	CEP128	353.944	335.596	396.95	325.967	314.593	338.815	342.434	370.621	519.311	331.659	376.645	348.553	433.283	385.964
TKOv3_02794	ANO10	177.344	244.628	368.028	321.745	414.08	548.059	423.773	295.528	304.272	304.02	267.771	385.677	296.168	342.779
TKOv3_24599	GLUD2	169.893	174.559	232.096	152.85	141.612	105.427	93.5391	106.584	201.873	274.655	146.146	213.463	214.996	153.846
TKOv3_13581	COL2A1	193.738	238.482	224.866	344.546	278.742	158.543	183.011	242.236	185.782	169.284	140.261	146.433	139.309	134.952
TKOv3_22544	FMO2	230.25	212.667	195.221	172.273	122.79	170.615	252.149	227.702	165.302	177.921	114.759	209.338	200.736	170.04
TKOv3_00846	ACTL6B	576.742	446.231	578.433	463.617	585.269	474.824	457.935	574.907	637.801	464.668	465.902	444.456	488.128	418.353
TKOv3_30258	KAT2B	251.114	270.443	349.229	342.857	337	267.189	355.449	297.143	286.718	217.651	221.671	214.494	313.719	214.574
TKOv3_21724	FBXO27	148.284	129.075	213.297	176.495	127.271	250.288	137.462	220.435	157.988	236.652	117.701	196.963	177.701	140.351
TKOv3_55855	SLC36A2	230.995	165.954	233.542	331.879	194.492	292.137	216.36	256.77	229.667	259.108	282.484	191.807	219.384	264.507
TKOv3_31776	KLHL40	280.174	302.405	266.079	222.097	141.612	272.823	326.167	243.851	229.667	205.559	269.733	181.495	211.705	261.808
TKOv3_57963	SPPL2A	96.1236	121.699	195.944	170.584	185.529	170.615	106.553	181.677	100.936	129.554	172.629	112.403	86.6565	161.943
TKOv3_42919	OSBPL10	222.798	237.253	142.439	173.962	128.168	159.348	252.149	209.131	280.867	262.563	290.33	214.494	326.882	179.487
TKOv3_02848	ANTXR1	147.539	181.935	213.297	151.161	193.596	185.101	204.159	227.702	248.684	200.377	239.326	175.308	166.732	160.593
TKOv3_01423	ADRB1	236.211	244.628	218.358	162.139	262.609	202.806	165.93	227.702	134.582	196.922	161.84	156.746	195.251	215.924
TKOv3_48396	PSMA8	110.281	73.7573	145.331	147.783	156.849	261.555	138.275	74.2858	137.508	43.1847	137.318	106.216	138.212	130.904
TKOv3_59667	TADA1	178.089	215.125	36.1521	71.7804	35.8511	70.0164	93.5391	83.9752	141.896	188.285	215.786	337.209	368.564	352.226
TKOv3_53082	SCD	181.07	179.476	73.0272	76.0027	91.4203	83.6978	86.2187	145.342	174.079	95.0064	104.951	77.3416	78.9781	133.603
TKOv3_38572	NACA2	247.388	237.253	172.084	164.673	143.404	181.882	187.892	169.565	150.673	203.832	210.882	178.401	223.771	214.574
TKOv3_20208	F11R	157.971	186.852	174.976	209.43	154.16	165.786	181.385	231.739	216.501	141.646	169.686	146.433	219.384	164.642
TKOv3_62832	TMX2	177.344	149.973	23.1373	19.4229	12.5479	18.5101	8.13384	61.3665	127.268	62.186	71.6017	68.0606	77.8812	35.0876
TKOv3_11085	CDC42SE1	160.206	172.1	206.067	135.96	207.04	151.3	190.332	123.54	169.69	172.739	186.361	153.652	211.705	224.021
TKOv3_33878	LRRC72	236.211	184.393	325.368	235.608	302.046	253.508	176.504	235.777	150.673	241.834	221.671	216.556	185.379	252.361
TKOv3_26220	GUSB	163.932	183.164	138.101	154.539	137.13	215.683	186.265	146.957	174.079	164.102	147.127	128.903	129.436	172.739
TKOv3_34120	LTF	149.029	208.979	131.593	188.318	132.649	173.834	211.48	198.634	210.65	172.739	219.709	241.306	241.322	194.332
TKOv3_12656	CLCNKB	114.752	89.738	118.579	103.026	107.553	66.7973	97.606	95.2796	106.788	174.466	132.414	106.216	83.3658	99.8648
TKOv3_14041	CPEB4	352.453	331.908	214.743	234.764	254.543	369.397	231.001	256.77	209.187	279.837	251.097	187.682	129.436	263.157
TKOv3_67936	ZBTB41	278.684	325.761	383.212	379.169	334.312	354.911	349.755	339.131	267.701	307.475	363.894	279.461	306.04	299.595
TKOv3_20371	FAM103A1	106.556	143.827	120.748	41.3793	79.7687	198.782	75.6447	110.621	137.508	96.7338	122.606	82.4977	84.4627	157.894
TKOv3_10116	CCDC60	134.126	119.241	105.564	204.363	121.894	124.742	171.624	89.6274	162.376	196.922	144.184	144.371	162.344	187.584
TKOv3_02500	ANKDD1A	317.431	280.278	287.77	189.162	254.543	321.11	263.536	226.895	352.546	376.571	256.001	371.239	467.287	396.76
TKOv3_52722	S1PR4	362.885	362.64	152.562	119.915	137.13	188.32	258.656	119.503	184.319	209.014	198.131	307.304	233.643	286.099
TKOv3_32563	LCA5L	132.636	149.973	174.976	135.116	172.982	202.806	188.705	174.41	115.565	134.736	108.874	102.091	98.7226	122.807
TKOv3_64831	TUBGCP3	212.366	324.532	75.1963	101.337	68.1171	45.8728	47.9896	60.559	86.308	79.4599	47.0806	57.7484	76.7842	79.622
TKOv3_05855	BLOC1S5	250.368	165.954	322.476	265.165	257.232	421.708	194.399	311.677	260.387	293.656	293.273	250.587	262.163	331.983
TKOv3_14138	CPSF2	96.8688	89.738	39.0442	74.3138	25.0958	68.4068	9.7606	68.6336	39.4969	43.1847	19.6169	32.9991	32.9075	26.9905
TKOv3_04386	ATE1	380.024	342.971	365.136	297.255	410.495	319.5	316.406	365.777	261.85	158.92	232.46	188.713	235.837	253.711
TKOv3_66771	WAS	263.036	236.023	154.731	254.187	164.019	202.806	186.265	182.485	212.113	253.926	207.939	244.399	283.005	225.371
TKOv3_63548	TRAF3	111.772	136.451	93.9953	91.2033	122.79	164.176	115.5	97.7019	146.285	133.009	153.993	83.5289	116.273	144.399
TKOv3_38803	NBN	196.718	210.208	205.344	236.453	201.662	160.152	203.346	164.721	261.85	207.287	251.097	184.589	165.635	133.603
TKOv3_48301	PRUNE2	160.951	210.208	331.876	379.169	436.487	280.87	217.173	284.224	244.296	233.197	265.809	265.024	312.622	298.245
TKOv3_49103	PXDC1	295.077	295.029	224.143	176.495	232.136	140.838	457.935	247.081	324.752	307.475	264.828	286.679	235.837	245.614
TKOv3_44161	PCIF1	198.208	151.202	232.819	303.166	250.061	160.957	126.074	150.186	131.656	238.38	229.518	240.274	191.961	171.39
TKOv3_12947	CLN3	144.558	158.578	214.743	118.226	249.165	218.902	217.173	240.621	210.65	193.468	212.844	230.993	165.635	211.875
TKOv3_68835	ZNF200	201.189	205.291	221.251	233.92	166.708	111.865	156.983	167.143	169.69	184.831	157.916	144.371	186.476	187.584
TKOv3_58251	SRRD	67.8081	46.7129	98.3336	61.6467	53.7767	44.2632	37.4156	50.0621	67.291	48.3669	55.9082	70.123	49.3613	74.2239
TKOv3_52965	SBF1	344.257	324.532	297.893	338.634	375.54	255.117	286.311	213.168	272.09	464.668	342.315	378.458	422.313	314.439
TKOv3_29107	IL36A	376.298	308.551	328.984	281.21	189.115	263.97	285.498	314.907	298.421	283.292	277.579	252.649	357.595	265.856
TKOv3_09110	CALHM2	270.487	270.443	260.295	180.718	179.256	181.077	211.48	211.553	162.376	179.648	131.433	194.901	205.124	151.147
TKOv3_26453	HAS3	195.973	140.139	210.405	162.139	266.194	288.918	214.733	181.677	166.765	202.104	182.437	218.619	264.357	265.856
TKOv3_37454	MS4A12	127.42	158.578	269.694	162.984	164.915	192.344	265.976	120.311	209.187	224.561	202.054	205.213	182.088	176.788
TKOv3_45212	PHKG1	217.582	199.145	272.586	303.166	235.721	210.854	331.861	288.261	201.873	247.017	240.307	221.712	218.287	205.128
TKOv3_08824	CA14	73.0241	59.0058	114.964	52.3574	77.0799	82.893	39.8558	84.7827	78.9938	77.7325	110.836	70.123	87.7534	82.321
TKOv3_50774	RFX3	308.49	303.634	391.888	449.261	374.644	333.181	304.205	351.242	364.249	435.302	334.468	327.928	291.78	341.43
TKOv3_54995	SLC12A3	157.225	169.642	146.777	152.85	170.293	164.981	217.987	166.336	174.079	184.831	172.629	238.212	157.956	180.836
TKOv3_04388	ATF1	125.184	130.305	98.3336	116.538	51.9841	121.523	122.821	155.839	96.5479	72.5503	91.2187	103.122	86.6565	63.4277
TKOv3_70114	ZNF726	249.623	247.087	316.692	359.746	290.394	295.357	435.16	377.888	304.272	362.752	248.154	309.366	307.137	326.585
TKOv3_14367	CRISP3	312.215	283.965	395.503	488.106	492.953	378.249	329.42	403.727	368.638	354.115	327.603	423.832	320.3	322.536
TKOv3_45298	PHYKPL	276.449	211.438	283.432	260.098	239.306	323.524	254.589	233.354	292.569	343.75	403.128	270.18	249	290.148
TKOv3_68010	ZC2HC1A	304.019	392.143	256.68	399.437	318.179	479.653	312.339	364.969	438.854	392.117	380.568	455.8	381.727	395.411
TKOv3_36888	MPDU1	159.461	221.272	247.28	191.696	193.596	239.021	161.05	151.801	223.816	266.018	194.207	272.242	218.287	199.73
TKOv3_37380	MRPS26	121.459	98.343	10.1226	6.7558	5.37767	2.41436	13.0141	6.45963	17.5542	32.8204	29.4254	39.1864	29.6168	26.9905
TKOv3_51952	RPL26L1	246.643	224.96	156.177	141.872	155.056	217.292	222.054	170.373	226.741	188.285	216.767	230.993	172.216	186.234
TKOv3_41902	OR2AG2	111.026	108.177	100.503	160.45	100.383	79.6738	195.212	118.696	89.2337	207.287	99.0654	159.839	141.502	134.952
TKOv3_50609	REM2	160.206	142.597	156.177	103.87	120.101	93.3552	140.715	163.106	112.639	162.375	111.816	153.652	151.375	126.855
TKOv3_53557	SEC61G	178.089	269.214	309.462	289.655	251.854	309.843	269.23	171.988	216.501	219.378	209.901	233.056	242.419	271.255
TKOv3_03977	ARRB1	332.334	308.551	267.525	421.393	395.258	327.548	312.339	419.876	536.865	424.938	380.568	525.923	461.802	479.081
TKOv3_05205	BABAM1	75.2596	62.6937	30.3677	19.4229	17.9256	31.3867	6.50707	3.22982	65.8281	41.4573	41.1955	36.0927	27.4229	47.2334
TKOv3_24614	GLYATL2	316.686	331.908	358.628	428.993	358.511	296.966	431.907	397.267	441.78	475.032	390.377	425.894	394.89	442.644
TKOv3_67105	WDR88	180.325	231.106	239.327	335.257	278.742	243.045	335.927	223.665	258.924	162.375	193.227	175.308	262.163	219.973
TKOv3_36084	MFNG	287.626	259.38	401.288	250.809	311.008	162.567	337.554	227.702	299.884	283.292	263.848	236.15	268.745	303.643
TKOv3_69923	ZNF646	734.712	662.586	691.227	692.469	814.716	540.012	627.932	670.994	895.263	842.966	849.412	718.761	564.913	601.888
TKOv3_16840	DISP2	195.228	165.954	281.986	213.652	155.056	286.504	376.597	276.957	96.5479	150.283	180.476	149.527	116.273	121.457
TKOv3_69764	ZNF585A	99.8493	89.738	111.348	125.827	156.849	85.3073	92.7257	54.9069	138.971	143.373	96.1229	96.9348	178.798	86.3696
TKOv3_04044	ARSK	213.856	149.973	193.052	181.562	195.389	165.786	166.744	154.224	65.8281	157.192	141.242	187.682	120.661	168.691
TKOv3_60245	TBX19	90.9076	89.738	57.1202	150.317	76.1836	110.256	143.156	78.323	76.0681	65.6408	107.893	80.4352	84.4627	110.661
TKOv3_70321	ZNF827	293.587	333.137	349.952	247.431	295.772	342.034	378.223	314.1	318.901	264.29	370.76	286.679	266.551	307.692
TKOv3_37591	MSRB1	197.463	201.603	142.439	119.915	101.279	97.3791	102.486	41.1802	117.028	200.377	224.614	138.184	197.445	224.021
TKOv3_43818	PBX2	257.075	199.145	268.971	355.524	358.511	251.898	285.498	319.752	307.198	271.2	335.449	187.682	281.908	300.944
TKOv3_53111	SCGB1A1	506.698	462.212	486.607	521.885	510.878	420.098	560.421	562.795	630.487	478.487	458.055	675.45	557.234	520.917
TKOv3_01285	ADH1B	176.599	173.33	229.927	254.187	226.758	139.228	252.962	175.218	228.204	143.373	251.097	214.494	209.511	195.681
TKOv3_56319	SLC8A2	281.665	286.424	208.236	240.675	187.322	181.882	187.078	150.186	234.056	167.557	267.771	333.084	281.908	338.731
TKOv3_05262	BAI2	262.291	260.609	358.628	319.212	308.319	439.413	280.617	409.379	258.924	281.564	360.951	309.366	355.401	268.555
TKOv3_29618	IRAK1	259.31	211.438	235.711	253.342	285.016	230.974	319.66	273.727	253.073	283.292	218.729	256.774	195.251	202.429
TKOv3_54269	SGCZ	123.694	124.158	168.469	184.94	217.795	195.563	331.861	223.665	197.484	124.372	197.15	119.622	178.798	156.545
TKOv3_35495	MCM7	269.742	277.819	296.447	302.322	360.304	190.734	175.691	205.093	311.587	228.015	222.652	186.651	311.525	246.963
TKOv3_49849	RANGRF	233.23	239.711	275.479	167.206	186.426	195.563	205.786	314.907	263.313	176.194	226.575	237.181	146.987	202.429
TKOv3_33775	LRRC40	217.582	227.418	250.895	224.63	251.854	245.46	264.35	243.851	370.1	267.745	264.828	268.117	346.626	234.817
TKOv3_11432	CDKN2D	268.252	312.239	187.991	269.387	162.226	262.36	148.036	278.572	412.523	305.748	245.211	415.582	528.714	368.42
TKOv3_55780	SLC35C1	166.912	133.992	100.503	94.5812	120.997	111.06	140.715	130	127.268	250.471	85.3336	182.526	182.088	124.156
TKOv3_57389	SOX15	105.065	108.177	66.5198	130.894	173.878	106.232	147.222	45.2174	106.788	105.371	153.012	105.185	87.7534	124.156
TKOv3_51841	RPA4	154.99	192.998	251.618	199.296	198.077	112.67	136.648	78.323	181.393	127.827	204.997	156.746	161.247	144.399
TKOv3_19938	ETV1	62.5921	44.2544	61.4585	65.869	38.5399	95.7696	61.8172	107.391	26.3313	41.4573	76.506	58.7796	51.5551	64.7772
TKOv3_32824	LETM1	114.007	165.954	39.0442	59.9577	113.827	123.132	25.2149	16.9565	102.399	76.0051	118.682	83.5289	149.181	68.8258
TKOv3_40496	NR2F2	209.386	202.832	182.206	203.518	175.67	85.3073	98.4194	79.9379	317.438	250.471	279.541	340.303	293.974	232.118
TKOv3_03815	ARL5C	210.131	165.954	263.187	203.518	190.011	184.296	217.173	266.46	171.153	198.65	193.227	272.242	191.961	178.137
TKOv3_25739	GRIA4	204.915	226.189	233.542	243.209	255.439	226.95	188.705	255.155	294.032	240.107	239.326	257.805	152.472	240.215
TKOv3_33563	LRIG2	192.247	146.285	198.113	126.671	154.16	139.228	149.663	181.677	169.69	150.283	232.46	193.87	171.119	194.332
TKOv3_33112	LIN7C	274.958	228.648	144.608	124.982	243.787	167.396	204.159	129.193	242.833	240.107	230.499	226.869	233.643	325.236
TKOv3_25447	GPR39	362.885	371.245	364.413	356.368	399.74	435.389	456.308	521.615	295.495	335.113	309.947	315.554	308.234	390.013
TKOv3_29417	INSM2	207.895	210.208	130.147	225.475	130.857	210.854	180.571	221.242	171.153	238.38	199.112	274.305	136.018	178.137
TKOv3_36626	MMP19	253.349	242.17	161.961	282.899	181.048	128.766	118.754	194.596	171.153	267.745	138.299	138.184	149.181	133.603
TKOv3_38628	NAIF1	230.995	264.297	287.77	194.229	329.83	287.309	379.037	402.92	235.518	231.47	239.326	268.117	297.265	251.012
TKOv3_39671	NHLRC4	153.5	121.699	232.819	252.498	259.024	183.491	206.599	214.783	119.953	134.736	102.989	141.277	178.798	102.564
TKOv3_00736	ACRC	171.383	163.495	287.77	174.806	226.758	262.36	161.05	161.491	191.633	210.741	185.38	223.775	200.736	219.973
TKOv3_60635	TEKT1	263.036	271.673	268.248	241.52	219.588	175.443	301.765	220.435	253.073	248.744	169.686	250.587	224.868	249.662
TKOv3_47830	PRLHR	178.089	153.661	195.221	195.918	285.913	168.2	293.631	138.882	194.559	245.289	142.223	293.898	218.287	129.554
TKOv3_23855	GCKR	231.74	215.125	226.312	155.383	193.596	202.001	128.515	227.702	190.17	184.831	176.552	151.589	118.467	164.642
TKOv3_15853	DCAF8	249.623	236.023	298.616	367.347	414.977	368.592	350.568	276.957	172.616	200.377	218.729	228.931	164.538	244.264
TKOv3_36732	MOB1B	168.403	191.769	197.39	360.591	186.426	151.3	255.402	150.186	191.633	127.827	199.112	134.059	197.445	192.982
TKOv3_49280	R3HDM2	396.417	431.48	199.559	259.254	220.484	183.491	366.023	220.435	229.667	257.381	271.694	255.743	274.229	269.905
TKOv3_19718	ERGIC1	213.111	192.998	255.234	187.473	229.447	185.906	113.06	205.901	225.279	241.834	225.595	232.025	265.454	180.836
TKOv3_07075	C16orf89	470.931	443.773	373.812	221.252	418.562	354.911	257.029	290.683	196.022	264.29	256.001	266.055	243.516	345.478
TKOv3_18873	EIF4E1B	241.427	288.883	253.064	236.453	194.492	261.555	219.614	194.596	371.563	316.112	228.537	212.431	322.494	230.769
TKOv3_68200	ZDHHC14	184.796	147.515	152.562	103.026	107.553	131.985	139.902	137.267	100.936	129.554	151.05	94.8723	87.7534	168.691
TKOv3_12183	CHM	160.206	183.164	195.944	165.517	301.149	271.213	221.24	195.404	267.701	138.191	179.495	168.089	223.771	236.167
TKOv3_06710	C11orf94	258.565	242.17	265.356	257.565	198.077	287.309	277.364	204.286	356.935	241.834	300.139	275.336	261.066	210.526
TKOv3_68597	ZMPSTE24	293.587	285.195	185.099	244.898	113.827	190.734	147.222	245.466	149.21	155.465	163.801	172.214	155.762	101.214
TKOv3_31593	KLF3	240.682	234.794	365.859	227.164	218.692	285.699	184.638	233.354	213.576	257.381	279.541	346.49	198.542	330.634
TKOv3_41766	OR14I1	421.752	385.996	546.619	912.033	738.533	636.586	745.059	637.081	557.345	445.666	406.07	381.552	465.093	434.547
TKOv3_44580	PDP1	173.619	148.744	191.606	278.677	179.256	124.742	238.321	224.472	130.193	133.009	150.069	125.809	189.767	102.564
TKOv3_62157	TMEM199	99.1042	94.6552	173.53	222.941	181.048	157.738	120.381	197.826	109.714	58.7312	95.142	93.8411	134.921	90.4182
TKOv3_55295	SLC22A4	212.366	204.062	220.528	190.007	153.263	140.838	269.23	205.901	251.61	179.648	209.901	239.243	285.199	201.079
TKOv3_19960	ETV5	137.852	158.578	119.302	135.96	77.0799	110.256	237.508	116.273	215.039	186.558	162.82	175.308	159.053	183.535
TKOv3_28295	ICA1	180.325	195.457	161.961	373.258	329.83	295.357	400.998	289.876	313.049	247.017	245.211	292.867	410.247	238.866
TKOv3_53114	SCGB1A1	310.725	297.488	408.518	320.056	330.726	375.03	161.05	205.093	254.535	259.108	296.215	311.429	304.943	252.361
TKOv3_36727	MOB1A	131.145	141.368	55.6742	163.828	97.6943	123.937	135.022	81.5529	130.193	107.098	157.916	114.466	110.789	107.962
TKOv3_29707	IRS4	138.597	140.139	142.439	136.805	177.463	164.176	134.208	156.646	165.302	169.284	121.625	146.433	254.485	122.807
TKOv3_51268	RMI1	149.029	162.266	38.3212	90.3588	37.6437	35.4106	30.9086	50.8696	67.291	95.0064	88.2761	122.715	141.502	47.2334
TKOv3_38888	NCF2	120.713	105.719	261.741	171.428	146.99	190.734	169.997	244.659	136.045	171.011	119.663	200.057	128.339	167.341
TKOv3_46567	POLD1	202.679	189.31	360.074	417.171	338.793	358.935	203.346	440.87	155.062	285.019	229.518	292.867	228.159	321.187
TKOv3_03701	ARID1A	304.019	399.519	185.822	272.765	187.322	142.447	352.195	217.205	371.563	361.024	299.158	269.149	242.419	310.391
TKOv3_54601	SHOC2	336.805	335.596	373.812	300.633	247.373	297.771	370.09	237.391	373.026	414.573	350.162	386.708	357.595	448.042
TKOv3_42684	OR6P1	374.808	371.245	290.663	314.989	387.192	284.894	320.473	330.249	409.597	364.479	399.204	411.457	465.093	363.022
TKOv3_28591	IFT20	204.915	254.463	190.883	220.408	284.12	147.276	165.93	113.044	241.37	300.566	172.629	307.304	253.388	317.138
TKOv3_39345	NEK7	140.832	114.324	191.606	163.828	305.631	231.778	172.437	265.652	149.21	101.916	149.089	161.902	161.247	155.195
TKOv3_50813	RGCC	302.529	259.38	447.562	306.544	425.732	323.524	448.174	485.28	412.523	476.759	538.484	402.176	388.309	337.381
TKOv3_16996	DMC1	173.619	216.355	242.219	357.213	263.506	247.874	226.121	317.329	241.37	228.015	229.518	215.525	209.511	323.886
TKOv3_52308	RRP15	179.58	175.788	120.748	88.6699	53.7767	117.499	57.7502	125.963	83.3823	95.0064	81.4102	101.06	72.3966	105.263
TKOv3_37677	MTDH	216.092	170.871	262.464	165.517	123.686	221.316	191.145	248.696	242.833	233.197	230.499	171.183	275.326	219.973
TKOv3_70103	ZNF713	233.975	199.145	206.79	293.877	366.578	296.161	199.279	163.913	228.204	181.376	231.48	234.087	206.221	210.526
TKOv3_52413	RSRC2	199.699	196.686	155.454	119.071	122.79	65.1877	65.8841	58.1367	177.005	112.28	140.261	166.027	146.987	141.7
TKOv3_31165	KIAA1328	286.135	270.443	361.521	464.461	521.634	333.181	330.234	305.218	370.1	378.298	397.243	358.865	415.732	421.052
TKOv3_59473	SYP	153.5	223.73	104.118	162.984	203.455	137.618	142.342	39.5652	153.599	172.739	141.242	153.652	183.185	94.4667
TKOv3_04127	ASB15	237.701	210.208	271.863	252.498	346.859	353.301	272.484	229.317	190.17	247.017	221.671	159.839	189.767	211.875
TKOv3_59822	TANGO6	218.327	207.75	18.7991	38.8458	38.5399	49.8967	85.4053	46.0249	11.7028	17.2739	49.0423	16.4995	51.5551	56.68
TKOv3_64908	TWIST2	213.111	162.266	244.388	266.854	293.979	177.858	262.723	189.752	241.37	240.107	274.637	281.523	249	249.662
TKOv3_25518	GPR84	160.206	170.871	158.346	222.941	136.234	127.961	100.86	83.9752	152.136	131.282	157.916	149.527	150.278	170.04
TKOv3_42996	OSR1	197.463	173.33	266.802	262.632	203.455	234.193	209.04	156.646	247.221	162.375	143.203	200.057	156.859	151.147
TKOv3_07773	C20orf202	432.184	456.066	392.611	396.903	576.306	410.441	635.253	693.603	545.642	492.306	477.672	518.704	482.644	475.033
TKOv3_19344	ENPP5	198.208	191.769	302.231	320.9	251.854	324.329	194.399	276.957	179.93	203.832	186.361	211.4	163.441	139.001
TKOv3_58695	STAU1	155.735	131.534	122.917	134.272	124.583	108.646	172.437	139.69	179.93	131.282	111.816	116.528	140.405	167.341
TKOv3_70095	ZNF710	204.915	213.896	163.407	98.8036	120.997	168.2	112.247	144.534	125.805	138.191	168.705	106.216	132.727	155.195
TKOv3_43454	PALLD	228.014	206.52	265.356	238.142	197.181	247.069	330.234	252.733	266.238	200.377	267.771	148.496	198.542	238.866
TKOv3_53810	2023-09-06	276.449	250.775	321.03	325.123	410.495	338.815	366.836	371.429	295.495	257.381	315.832	280.492	324.688	363.022
TKOv3_49281	R3HDM2	115.497	83.5916	96.8875	32.09	85.1464	86.9169	93.5391	196.211	98.0108	91.5516	119.663	65.9981	73.4935	93.1172
TKOv3_41698	OR11H6	108.046	99.5723	125.809	72.6248	155.952	143.252	181.385	97.7019	149.21	127.827	99.0654	123.746	165.635	159.244
TKOv3_67809	ZBBX	141.577	113.094	111.348	103.026	175.67	108.646	71.5778	58.1367	86.308	117.462	115.74	80.4352	144.793	105.263
TKOv3_52108	RPS16	225.034	234.794	49.8898	54.0464	27.7846	52.3111	39.0424	85.5901	61.4396	63.9134	86.3144	80.4352	92.1411	64.7772
TKOv3_23242	FZD3	128.165	114.324	125.086	98.8036	147.886	91.7456	119.567	104.969	124.342	117.462	120.644	107.247	143.696	74.2239
TKOv3_50988	RHBG	209.386	243.399	114.24	79.3806	147.886	55.5302	73.2045	190.559	156.525	103.643	123.587	134.059	114.079	145.749
TKOv3_64969	TXNDC9	229.504	220.043	158.346	218.719	160.434	148.885	191.145	230.124	185.782	257.381	219.709	228.931	196.348	201.079
TKOv3_11393	CDKL4	177.344	146.285	197.39	141.872	241.995	216.487	212.293	195.404	152.136	167.557	194.207	183.557	168.925	155.195
TKOv3_50603	REM1	321.157	275.36	212.574	147.783	164.915	247.069	194.399	342.36	285.255	222.833	193.227	267.086	272.036	192.982
TKOv3_10701	CD200R1L	193.738	192.998	171.361	197.607	145.197	171.419	191.959	276.957	242.833	207.287	195.188	246.462	334.56	303.643
TKOv3_41009	NUMB	198.208	173.33	249.449	320.056	246.476	261.555	175.691	262.423	352.546	297.111	342.315	337.209	403.666	368.42
TKOv3_63819	TRIM32	219.072	189.31	146.054	76.0027	147.886	181.882	276.55	173.603	209.187	209.014	168.705	186.651	205.124	188.933
TKOv3_52738	SAC3D1	204.915	200.374	149.67	269.387	256.335	119.913	82.9651	144.534	217.964	217.651	203.035	213.463	201.833	253.711
TKOv3_33163	LIPG	150.519	163.495	229.204	151.161	272.468	164.176	375.783	280.994	263.313	174.466	210.882	182.526	286.296	229.419
TKOv3_21578	FBLN5	167.657	131.534	106.287	141.027	192.7	64.3829	204.159	121.926	168.227	98.4612	84.3527	87.6538	142.599	99.8648
TKOv3_11279	CDK12	105.065	110.636	28.1986	29.5566	25.0958	8.85265	23.5881	51.6771	20.4799	29.3656	21.5786	28.8742	42.7798	25.641
TKOv3_64417	TSPO	172.128	114.324	90.3801	234.764	112.035	174.639	104.113	198.634	150.673	191.74	183.418	175.308	102.013	148.448
TKOv3_33101	LIN54	248.133	208.979	249.449	274.454	194.492	342.034	280.617	247.081	280.867	274.655	322.698	346.49	347.723	318.488
TKOv3_01108	ADAMTS2	163.187	120.47	224.866	121.604	216.003	280.066	228.561	306.025	157.988	200.377	165.763	236.15	198.542	168.691
TKOv3_46450	PNOC	266.016	222.501	323.199	370.724	371.059	419.294	139.089	222.05	321.826	359.297	256.001	449.612	232.547	306.342
TKOv3_05497	BCL11B	232.485	239.711	277.648	575.087	425.732	342.839	385.544	316.522	255.998	328.204	274.637	352.678	269.842	306.342
TKOv3_30847	KDM3A	144.558	178.247	190.883	161.295	170.293	119.913	137.462	196.211	207.724	157.192	161.84	224.806	156.859	141.7
TKOv3_53890	SERPINA3	119.223	95.8845	44.8285	166.362	159.537	193.953	214.733	66.2112	118.491	190.013	143.203	104.153	108.595	95.8163
TKOv3_54651	SIAH3	227.269	248.316	356.459	377.48	413.184	321.914	482.336	394.038	437.391	362.752	329.564	296.992	326.882	300.944
TKOv3_45512	PIK3IP1	236.956	274.131	338.383	356.368	498.33	401.588	365.209	360.124	289.644	285.019	407.051	326.897	239.128	403.508
TKOv3_09993	CCDC180	313.706	357.723	428.763	317.523	409.599	395.955	295.258	373.044	255.998	259.108	272.675	259.868	306.04	256.41
TKOv3_51715	RNH1	303.274	335.596	159.069	179.873	244.684	272.823	235.068	155.031	305.735	374.843	269.733	324.835	265.454	333.333
TKOv3_45373	PIEZO1	278.684	313.468	326.092	244.898	192.7	275.237	259.469	209.131	275.015	326.476	223.633	312.46	183.185	205.128
TKOv3_68431	ZFR	149.774	120.47	150.393	114.849	173.878	109.451	217.173	164.721	96.5479	105.371	122.606	137.152	105.304	126.855
TKOv3_66874	WDR13	61.1018	49.1715	80.2576	96.2701	93.2129	155.324	135.022	121.926	182.856	169.284	159.878	238.212	164.538	233.468
TKOv3_56692	SMEK1	186.286	141.368	227.758	240.675	274.261	279.261	235.881	268.882	90.6965	174.466	158.897	120.653	52.6521	124.156
TKOv3_52048	RPP25	257.075	137.68	137.378	177.34	226.758	138.423	217.987	179.255	157.988	176.194	195.188	158.808	146.987	182.186
TKOv3_43798	PBK	166.167	175.788	221.251	192.54	186.426	274.432	329.42	272.112	279.404	186.558	221.671	178.401	235.837	245.614
TKOv3_54128	SF3A2	219.072	288.883	31.8138	27.8677	34.0585	12.8766	50.4298	50.0621	77.5309	53.5491	38.253	46.4049	73.4935	109.312
TKOv3_51248	RLN2	228.014	217.584	420.81	282.899	226.758	334.791	285.498	360.932	342.306	338.568	349.181	329.991	341.141	279.352
TKOv3_60341	TCEANC2	127.42	167.183	197.39	198.452	134.442	169.81	135.835	121.118	159.45	157.192	128.491	151.589	150.278	140.351
TKOv3_00323	ABHD13	160.951	147.515	325.368	212.808	304.734	245.46	229.374	203.478	112.639	119.19	110.836	187.682	119.564	122.807
TKOv3_67987	ZBTB7B	378.533	445.002	358.628	228.853	419.458	235.802	238.321	381.118	305.735	354.115	285.426	263.993	231.45	306.342
TKOv3_59285	SVEP1	332.334	291.341	222.697	396.903	431.109	384.688	226.934	429.566	359.86	395.572	353.104	438.269	385.018	485.829
TKOv3_48560	PSMG4	205.66	175.788	318.861	471.217	389.881	393.54	455.495	299.565	320.364	309.203	295.235	337.209	279.714	303.643
TKOv3_24918	GOLGA6L2	148.284	148.744	209.682	195.074	218.692	226.145	170.811	175.218	210.65	158.92	147.127	206.244	287.392	228.07
TKOv3_04307	ASRGL1	110.281	152.432	154.008	68.4025	156.849	49.092	93.5391	139.69	128.731	191.74	116.721	167.058	104.207	75.5734
TKOv3_69257	ZNF385D	219.818	232.335	255.957	385.081	217.795	232.583	196.025	197.826	285.255	207.287	177.533	299.054	245.71	163.293
TKOv3_00409	ABLIM2	298.058	306.093	360.074	326.812	299.357	469.995	313.966	300.373	254.535	266.018	240.307	354.74	274.229	241.565
TKOv3_43092	OTUD6B	139.342	122.929	258.126	246.587	166.708	259.141	217.173	269.69	149.21	247.017	151.05	326.897	283.005	267.206
TKOv3_15192	CXorf21	316.686	313.468	459.854	430.682	388.984	554.498	630.372	352.857	419.837	380.026	413.917	343.397	290.683	317.138
TKOv3_50268	RBM42	109.536	89.738	36.1521	52.3574	55.5692	46.6776	126.888	130	96.5479	96.7338	94.1612	116.528	114.079	117.409
[truncated: 68,682 more rows]
