# Supplementary material for: Genome-Wide CRISPR Screens Reveal ZATT as a Synthetic Lethal Target of TOP2-Poison Etoposide That Can Act in a TDP2-Independent Pathway
Source: Int J Mol Sci. 2023 Mar 31;24(7):6545. doi: 10.3390/ijms24076545 (PMC10095316; doi:10.3390/ijms24076545)
Supplement: Supplementary file 1 [file ijms-24-06545-s001.zip › Table S2. Drug Z score ranking of ETO co-essential genes in 293A WT cells.xlsx]

## Sheet: WT_ETO
GENE	sumZ	numObs	normZ	pval_synth	rank_synth	fdr_synth	pval_supp	rank_supp	fdr_supp
ZNF451	-64.38	12	-16.49	2.33e-61	1	4.17e-57	1	17928	1
ABCC1	-38	12	-9.63	3e-22	2	2.69e-18	1	17927	1
BRCC3	-21.03	12	-5.22	8.95e-08	3	0.000535	1	17926	1
DBF4	-20.28	12	-5.02	2.55e-07	4	0.00114	1	17925	1
CRAMP1L	-19.99	12	-4.95	3.76e-07	5	0.00135	1	17924	1
RAD51B	-19.16	12	-4.73	1.1e-06	6	0.00329	1	17923	1
SAFB	-18.34	12	-4.52	3.11e-06	7	0.00797	1	17922	1
CELF1	-17.33	12	-4.26	1.04e-05	8	0.0234	1	17921	1
VCPIP1	-17.09	12	-4.19	1.37e-05	9	0.0273	1	17920	1
ACHE	-16.03	12	-3.92	4.47e-05	10	0.0801	1	17919	1
ATM	-15.72	12	-3.84	6.2e-05	11	0.101	1	17918	1
CASP10	-13.48	9	-3.8	7.25e-05	12	0.108	1	17917	1
UIMC1	-15.39	12	-3.75	8.76e-05	13	0.121	1	17916	1
TPSG1	-15.28	12	-3.72	9.82e-05	14	0.126	1	17915	1
PZP	-15.21	12	-3.7	0.000106	15	0.127	1	17914	1
ARID4A	-15.13	12	-3.69	0.000114	16	0.128	1	17913	1
PLEKHG6	-13.47	10	-3.59	0.000167	17	0.176	1	17912	1
XRCC2	-14.7	12	-3.57	0.000177	18	0.176	1	17911	1
LRWD1	-14.4	12	-3.49	0.000237	19	0.224	1	17910	1
C16orf72	-12.4	9	-3.47	0.000258	20	0.23	1	17909	1
C16orf11	-14.22	12	-3.45	0.000281	21	0.23	1	17908	1
KLHL15	-14.13	12	-3.42	0.000308	22	0.23	1	17907	1
PPM1G	-14.12	12	-3.42	0.00031	23	0.23	1	17906	1
CD81	-14.12	12	-3.42	0.000311	24	0.23	1	17905	1
G3BP1	-14.05	12	-3.4	0.000332	25	0.23	1	17904	1
CSPG4	-14.04	12	-3.4	0.000334	26	0.23	1	17903	1
BHLHA15	-13.92	12	-3.37	0.000377	27	0.236	1	17902	1
DNM2	-13.91	12	-3.37	0.000379	28	0.236	1	17901	1
TOP1	-13.9	12	-3.37	0.000382	29	0.236	1	17900	1
AP2S1	-13.77	12	-3.33	0.00043	30	0.257	1	17899	1
DVL1	-13.72	12	-3.32	0.000453	31	0.262	1	17898	1
KCNJ8	-13.63	12	-3.3	0.000491	32	0.272	1	17897	1
ZNF688	-13.58	12	-3.28	0.000514	33	0.272	0.999	17896	1
LETM1	-11.76	9	-3.28	0.000516	34	0.272	0.999	17895	1
RAD51D	-13.47	12	-3.25	0.000568	35	0.291	0.999	17894	1
SCAF4	-13.35	12	-3.22	0.000638	36	0.318	0.999	17893	1
CORO1A	-13.31	12	-3.21	0.00066	37	0.32	0.999	17892	1
TSFM	-13.22	12	-3.19	0.000718	38	0.329	0.999	17891	1
SIAH1	-13.2	12	-3.18	0.000728	39	0.329	0.999	17890	1
BRE	-13.19	12	-3.18	0.000734	40	0.329	0.999	17889	1
DHDDS	-13.11	12	-3.16	0.000789	41	0.345	0.999	17888	1
DCLRE1C	-13.05	12	-3.14	0.000833	42	0.355	0.999	17887	1
METTL22	-13.02	12	-3.14	0.000856	43	0.357	0.999	17886	1
ORAI2	-12.98	12	-3.13	0.000883	44	0.36	0.999	17885	1
IER5L	-12.95	12	-3.12	0.000911	45	0.363	0.999	17884	1
CCDC88A	-12.87	12	-3.1	0.000976	46	0.363	0.999	17883	1
ZDHHC17	-12.82	12	-3.08	0.00102	47	0.363	0.999	17882	1
EWSR1	-12.82	12	-3.08	0.00102	48	0.363	0.999	17881	1
HIST1H1C	-12.76	12	-3.07	0.00108	49	0.363	0.999	17880	1
IGFALS	-12.75	12	-3.07	0.00109	50	0.363	0.999	17879	1
ATP1B4	-12.74	12	-3.06	0.00109	51	0.363	0.999	17878	1
SAC3D1	-12.74	12	-3.06	0.0011	52	0.363	0.999	17877	1
TTYH3	-12.71	12	-3.06	0.00112	53	0.363	0.999	17876	1
FXYD7	-12.7	12	-3.05	0.00113	54	0.363	0.999	17875	1
MLYCD	-12.7	12	-3.05	0.00113	55	0.363	0.999	17874	1
METRN	-12.69	12	-3.05	0.00115	56	0.363	0.999	17873	1
KIAA1524	-12.68	12	-3.05	0.00115	57	0.363	0.999	17872	1
TTI1	-12.66	12	-3.04	0.00118	58	0.363	0.999	17871	1
NHEJ1	-12.61	12	-3.03	0.00122	59	0.37	0.999	17870	1
FGB	-12.59	12	-3.02	0.00125	60	0.373	0.999	17869	1
MAPKAP1	-12.5	12	-3	0.00135	61	0.396	0.999	17868	1
OR4C5	-12.42	12	-2.98	0.00144	62	0.401	0.999	17867	1
AMDHD2	-12.41	12	-2.98	0.00145	63	0.401	0.999	17866	1
PTPN5	-12.4	12	-2.98	0.00146	64	0.401	0.999	17865	1
CCDC85B	-12.39	12	-2.97	0.00147	65	0.401	0.999	17864	1
FAHD1	-12.39	12	-2.97	0.00148	66	0.401	0.999	17863	1
LAT	-12.36	12	-2.96	0.00151	67	0.405	0.998	17862	1
NF2	-12.34	12	-2.96	0.00154	68	0.405	0.998	17861	1
FZR1	-12.25	12	-2.94	0.00166	69	0.418	0.998	17860	1
NUDT16L1	-12.21	12	-2.93	0.00171	70	0.418	0.998	17859	1
STON2	-12.2	12	-2.92	0.00173	71	0.418	0.998	17858	1
OR8K5	-12.2	12	-2.92	0.00174	72	0.418	0.998	17857	1
SLC20A1	-12.18	12	-2.92	0.00176	73	0.418	0.998	17856	1
CYP46A1	-12.16	12	-2.91	0.0018	74	0.418	0.998	17855	1
RNF6	-12.15	12	-2.91	0.00181	75	0.418	0.998	17854	1
CHD2	-12.15	12	-2.91	0.00181	76	0.418	0.998	17853	1
ZNF174	-12.14	12	-2.91	0.00182	77	0.418	0.998	17852	1
C11orf58	-12.14	12	-2.91	0.00182	78	0.418	0.998	17851	1
CDK5	-12.09	12	-2.9	0.00189	79	0.425	0.998	17850	1
MEIS2	-12.09	12	-2.89	0.0019	80	0.425	0.998	17849	1
C20orf196	-12.06	12	-2.89	0.00194	81	0.426	0.998	17848	1
CAB39	-12.06	12	-2.89	0.00195	82	0.426	0.998	17847	1
GLIS2	-12.03	12	-2.88	0.00199	83	0.427	0.998	17846	1
ZNF781	-8.49	6	-2.87	0.00202	84	0.427	0.998	17845	1
EPC1	-11.97	12	-2.86	0.00209	85	0.427	0.998	17844	1
ST8SIA2	-11.95	12	-2.86	0.00213	86	0.427	0.998	17843	1
PLEC	-11.94	12	-2.86	0.00215	87	0.427	0.998	17842	1
OR52E8	-11.93	12	-2.85	0.00217	88	0.427	0.998	17841	1
TFAP2A	-11.92	12	-2.85	0.00218	89	0.427	0.998	17840	1
ADAL	-11.92	12	-2.85	0.00219	90	0.427	0.998	17839	1
TMEM53	-11.9	12	-2.85	0.00222	91	0.427	0.998	17838	1
CDS2	-11.88	12	-2.84	0.00226	92	0.427	0.998	17837	1
EFEMP1	-11.88	12	-2.84	0.00226	93	0.427	0.998	17836	1
UBA2	-11.87	12	-2.84	0.00227	94	0.427	0.998	17835	1
RABGEF1	-11.86	12	-2.83	0.00229	95	0.427	0.998	17834	1
POLL	-11.86	12	-2.83	0.0023	96	0.427	0.998	17833	1
NCF1	-11.84	12	-2.83	0.00233	97	0.427	0.998	17832	1
POLQ	-11.82	12	-2.82	0.00237	98	0.427	0.998	17831	1
NCOR1	-11.81	12	-2.82	0.00238	99	0.427	0.998	17830	1
ERBB4	-11.81	12	-2.82	0.00238	100	0.427	0.998	17829	1
GNPTG	-11.78	12	-2.81	0.00245	101	0.434	0.998	17828	1
HIST1H4L	-10.17	9	-2.8	0.00252	102	0.442	0.997	17827	1
TNPO1	-11.72	12	-2.8	0.00256	103	0.446	0.997	17826	1
PLEKHJ1	-11.7	12	-2.79	0.0026	104	0.448	0.997	17825	1
FAM175A	-11.69	12	-2.79	0.00263	105	0.449	0.997	17824	1
CRCP	-11.67	12	-2.78	0.00268	106	0.452	0.997	17823	1
CLCN7	-11.66	12	-2.78	0.0027	107	0.452	0.997	17822	1
SPATC1	-11.65	12	-2.78	0.00272	108	0.452	0.997	17821	1
RB1	-11.61	12	-2.77	0.0028	109	0.461	0.997	17820	1
AGFG2	-11.55	12	-2.75	0.00294	110	0.477	0.997	17819	1
HOXA11	-11.54	12	-2.75	0.00296	111	0.477	0.997	17818	1
PEX1	-11.52	12	-2.75	0.00301	112	0.481	0.997	17817	1
ASPRV1	-11.51	12	-2.74	0.00304	113	0.482	0.997	17816	1
RSRC2	-11.5	12	-2.74	0.00306	114	0.482	0.997	17815	1
PEX11A	-11.48	12	-2.74	0.00312	115	0.486	0.997	17814	1
C11orf57	-11.44	12	-2.73	0.0032	116	0.495	0.997	17813	1
TPD52L2	-11.42	12	-2.72	0.00325	117	0.498	0.997	17812	1
CPT2	-11.36	12	-2.71	0.0034	118	0.501	0.997	17811	1
IFNAR2	-11.36	12	-2.71	0.00341	119	0.501	0.997	17810	1
GRIA4	-11.36	12	-2.7	0.00342	120	0.501	0.997	17809	1
ZNF655	-11.35	12	-2.7	0.00343	121	0.501	0.997	17808	1
TDP2	-11.33	12	-2.7	0.00349	122	0.501	0.997	17807	1
GIMAP8	-11.33	12	-2.7	0.00349	123	0.501	0.997	17806	1
CFP	-11.33	12	-2.7	0.0035	124	0.501	0.996	17805	1
CAPRIN1	-11.33	12	-2.7	0.0035	125	0.501	0.996	17804	1
KMT2A	-11.31	12	-2.69	0.00354	126	0.501	0.996	17803	1
CDADC1	-11.3	12	-2.69	0.00357	127	0.501	0.996	17802	1
PRTG	-11.29	12	-2.69	0.00361	128	0.501	0.996	17801	1
MAPK13	-11.28	12	-2.68	0.00365	129	0.501	0.996	17800	1
MAGEL2	-11.27	12	-2.68	0.00365	130	0.501	0.996	17799	1
EIF2AK1	-11.26	12	-2.68	0.00369	131	0.501	0.996	17798	1
MAPK8IP3	-11.26	12	-2.68	0.00369	132	0.501	0.996	17797	1
SLC25A1	-11.25	12	-2.68	0.00373	133	0.501	0.996	17796	1
POLR3K	-11.24	12	-2.67	0.00375	134	0.501	0.996	17795	1
ZNF689	-11.21	12	-2.67	0.00383	135	0.508	0.996	17794	1
SNRNP35	-11.2	12	-2.66	0.00386	136	0.509	0.996	17793	1
BRD7	-11.19	12	-2.66	0.0039	137	0.509	0.996	17792	1
B3GNT9	-11.18	12	-2.66	0.00392	138	0.509	0.996	17791	1
PTPRZ1	-11.13	12	-2.64	0.0041	139	0.528	0.996	17790	1
CDK6	-11.11	12	-2.64	0.00414	140	0.53	0.996	17789	1
SPC25	-11.1	12	-2.64	0.00418	141	0.531	0.996	17788	1
SAE1	-10.61	11	-2.63	0.00424	142	0.533	0.996	17787	1
FAM45A	-11.07	12	-2.63	0.00428	143	0.533	0.996	17786	1
ASUN	-11.06	12	-2.63	0.0043	144	0.533	0.996	17785	1
MAPKAPK2	-11.05	12	-2.63	0.00433	145	0.533	0.996	17784	1
LCAT	-11.05	12	-2.62	0.00435	146	0.533	0.996	17783	1
TP53BP1	-11.04	12	-2.62	0.00437	147	0.533	0.996	17782	1
MFAP1	-11.03	12	-2.62	0.00442	148	0.535	0.996	17781	1
UBTF	-11.02	12	-2.62	0.00445	149	0.535	0.996	17780	1
ID2	-11	12	-2.61	0.00449	150	0.535	0.996	17779	1
C1QC	-11	12	-2.61	0.0045	151	0.535	0.995	17778	1
GFER	-10.99	12	-2.61	0.00454	152	0.535	0.995	17777	1
CHD8	-10.98	12	-2.61	0.00457	153	0.535	0.995	17776	1
EVI2A	-10.97	12	-2.6	0.00461	154	0.535	0.995	17775	1
STRA13	-10.97	12	-2.6	0.00463	155	0.535	0.995	17774	1
CPSF2	-10.93	12	-2.59	0.00475	156	0.545	0.995	17773	1
HEXIM1	-10.92	12	-2.59	0.00478	157	0.545	0.995	17772	1
C11orf85	-10.91	12	-2.59	0.00482	158	0.547	0.995	17771	1
RHBDF1	-10.9	12	-2.59	0.00486	159	0.548	0.995	17770	1
ST6GAL1	-10.87	12	-2.58	0.00497	160	0.557	0.995	17769	1
ANKRD66	-10.86	12	-2.57	0.00503	161	0.56	0.995	17768	1
CYP2R1	-10.83	12	-2.57	0.00514	162	0.569	0.995	17767	1
NOP10	-10.81	12	-2.56	0.00521	163	0.573	0.995	17766	1
CCL24	-10.8	12	-2.56	0.00525	164	0.574	0.995	17765	1
ZIK1	-10.74	12	-2.54	0.00548	165	0.592	0.995	17764	1
TECTB	-10.74	12	-2.54	0.0055	166	0.592	0.995	17763	1
C11orf30	-10.73	12	-2.54	0.00552	167	0.592	0.994	17762	1
DDX46	-10.72	12	-2.54	0.00556	168	0.592	0.994	17761	1
ZMYM2	-10.72	12	-2.54	0.00558	169	0.592	0.994	17760	1
CCDC146	-10.7	12	-2.53	0.00564	170	0.592	0.994	17759	1
OR2A14	-10.69	12	-2.53	0.00567	171	0.592	0.994	17758	1
TSN	-10.69	12	-2.53	0.00568	172	0.592	0.994	17757	1
SKA2	-10.68	12	-2.53	0.00573	173	0.593	0.994	17756	1
C7orf49	-10.65	12	-2.52	0.00588	174	0.606	0.994	17755	1
CRHR1	-10.64	12	-2.52	0.00592	175	0.606	0.994	17754	1
JMY	-10.62	12	-2.51	0.00601	176	0.612	0.994	17753	1
FANCF	-10.6	12	-2.51	0.00607	177	0.612	0.994	17752	1
FANCI	-10.59	12	-2.51	0.00611	178	0.612	0.994	17751	1
XRCC4	-10.58	12	-2.5	0.00615	179	0.612	0.994	17750	1
RAB35	-10.57	12	-2.5	0.00623	180	0.612	0.994	17749	1
LMOD2	-10.56	12	-2.5	0.00624	181	0.612	0.994	17748	1
CDK13	-10.56	12	-2.5	0.00625	182	0.612	0.994	17747	1
SLC2A13	-10.56	12	-2.5	0.00625	183	0.612	0.994	17746	1
LGI1	-9.61	10	-2.49	0.00643	184	0.613	0.994	17745	1
PGP	-10.51	12	-2.48	0.00648	185	0.613	0.994	17744	1
DOK1	-10.51	12	-2.48	0.00649	186	0.613	0.994	17743	1
TPST1	-10.51	12	-2.48	0.00651	187	0.613	0.993	17742	1
ARHGAP32	-10.5	12	-2.48	0.00652	188	0.613	0.993	17741	1
AS3MT	-10.5	12	-2.48	0.00653	189	0.613	0.993	17740	1
GCK	-10.5	12	-2.48	0.00654	190	0.613	0.993	17739	1
TRIP12	-10.5	12	-2.48	0.00655	191	0.613	0.993	17738	1
EPO	-10.49	12	-2.48	0.00657	192	0.613	0.993	17737	1
HDAC3	-10.48	12	-2.47	0.00666	193	0.619	0.993	17736	1
TDRD3	-10.45	12	-2.47	0.00678	194	0.624	0.993	17735	1
DNASE1L2	-10.45	12	-2.47	0.00678	195	0.624	0.993	17734	1
CNPY4	-10.44	12	-2.47	0.00685	196	0.626	0.993	17733	1
FOXK2	-10.42	12	-2.46	0.00693	197	0.631	0.993	17732	1
ATL3	-10.4	12	-2.45	0.00705	198	0.638	0.993	17731	1
EME2	-10.38	12	-2.45	0.00711	199	0.641	0.993	17730	1
OSBPL1A	-10.37	12	-2.45	0.00717	200	0.641	0.993	17729	1
NDUFV3	-10.37	12	-2.45	0.0072	201	0.641	0.993	17728	1
ID3	-10.36	12	-2.45	0.00722	202	0.641	0.993	17727	1
C11orf42	-10.35	12	-2.44	0.00729	203	0.644	0.993	17726	1
ZSCAN12	-10.34	12	-2.44	0.00734	204	0.645	0.993	17725	1
PTGR2	-10.33	12	-2.44	0.00742	205	0.645	0.993	17724	1
EIF3A	-10.33	12	-2.44	0.00742	206	0.645	0.993	17723	1
CA7	-10.32	12	-2.43	0.00745	207	0.645	0.993	17722	1
TUBB3	-10.28	12	-2.42	0.00767	208	0.656	0.992	17721	1
C1QTNF8	-10.26	12	-2.42	0.00779	209	0.656	0.992	17720	1
STK17A	-10.25	12	-2.42	0.00783	210	0.656	0.992	17719	1
SLC7A3	-10.25	12	-2.42	0.00783	211	0.656	0.992	17718	1
STPG2	-10.25	12	-2.42	0.00784	212	0.656	0.992	17717	1
STK24	-10.25	12	-2.42	0.00786	213	0.656	0.992	17716	1
AEBP1	-10.24	12	-2.41	0.00789	214	0.656	0.992	17715	1
CCDC36	-10.23	12	-2.41	0.00795	215	0.656	0.992	17714	1
EVA1C	-8.85	9	-2.41	0.00803	216	0.656	0.992	17713	1
KMT2E	-10.22	12	-2.41	0.00803	217	0.656	0.992	17712	1
EHBP1L1	-10.22	12	-2.41	0.00803	218	0.656	0.992	17711	1
VPS4B	-10.21	12	-2.41	0.00807	219	0.656	0.992	17710	1
SLC39A5	-10.21	12	-2.41	0.00808	220	0.656	0.992	17709	1
ACOT7	-10.2	12	-2.4	0.00812	221	0.656	0.992	17708	1
COL6A1	-10.2	12	-2.4	0.00813	222	0.656	0.992	17707	1
MUC15	-10.17	12	-2.39	0.00832	223	0.668	0.992	17706	1
MGAT5	-10.15	12	-2.39	0.00839	224	0.668	0.992	17705	1
ZNF512B	-10.15	12	-2.39	0.00841	225	0.668	0.992	17704	1
RARRES2	-10.15	12	-2.39	0.00842	226	0.668	0.992	17703	1
WBSCR27	-10.13	12	-2.39	0.00851	227	0.669	0.991	17702	1
STOML3	-10.13	12	-2.39	0.00852	228	0.669	0.991	17701	1
ZNF627	-10.13	12	-2.38	0.00855	229	0.669	0.991	17700	1
KIFC3	-10.12	12	-2.38	0.00861	230	0.671	0.991	17699	1
SPTAN1	-10.1	12	-2.38	0.00873	231	0.674	0.991	17698	1
AIF1	-10.09	12	-2.38	0.00876	232	0.674	0.991	17697	1
CYSLTR1	-10.08	12	-2.37	0.00883	233	0.674	0.991	17696	1
PRR25	-8.73	9	-2.37	0.00885	234	0.674	0.991	17695	1
HRK	-10.07	12	-2.37	0.0089	235	0.674	0.991	17694	1
MATR3	-10.07	12	-2.37	0.0089	236	0.674	0.991	17693	1
ADAMDEC1	-10.07	12	-2.37	0.00893	237	0.674	0.991	17692	1
TNP2	-10.06	12	-2.37	0.00899	238	0.674	0.991	17691	1
PBRM1	-10.05	12	-2.37	0.009	239	0.674	0.991	17690	1
LIF	-10.05	12	-2.36	0.00902	240	0.674	0.991	17689	1
ARPC1B	-10.02	12	-2.36	0.00919	241	0.678	0.991	17688	1
CATSPER3	-10.02	12	-2.36	0.00921	242	0.678	0.991	17687	1
CCDC88C	-10.02	12	-2.36	0.00922	243	0.678	0.991	17686	1
GPR132	-10.01	12	-2.36	0.00926	244	0.678	0.991	17685	1
ISOC1	-10.01	12	-2.35	0.00931	245	0.678	0.991	17684	1
HINFP	-9.99	12	-2.35	0.00939	246	0.678	0.991	17683	1
BAG6	-9.99	12	-2.35	0.00941	247	0.678	0.991	17682	1
C9orf41	-9.99	12	-2.35	0.00942	248	0.678	0.991	17681	1
IL17REL	-9.98	12	-2.35	0.00946	249	0.678	0.991	17680	1
U2AF2	-9.56	11	-2.35	0.00948	250	0.678	0.991	17679	1
VPS4A	-9.97	12	-2.34	0.00952	251	0.678	0.99	17678	1
TIAL1	-9.97	12	-2.34	0.00952	252	0.678	0.99	17677	1
GTF2I	-9.95	12	-2.34	0.00967	253	0.681	0.99	17676	1
IFT81	-9.94	12	-2.33	0.00978	254	0.681	0.99	17675	1
CYP3A7	-9.93	12	-2.33	0.00982	255	0.681	0.99	17674	1
NGDN	-9.93	12	-2.33	0.00984	256	0.681	0.99	17673	1
DNAJA2	-9.92	12	-2.33	0.00989	257	0.681	0.99	17672	1
PTHLH	-9.91	12	-2.33	0.00992	258	0.681	0.99	17671	1
OR2T6	-9.91	12	-2.33	0.00996	259	0.681	0.99	17670	1
FKBP10	-9.91	12	-2.33	0.00996	260	0.681	0.99	17669	1
ZNF747	-9.91	12	-2.33	0.00997	261	0.681	0.99	17668	1
LMNB1	-9.91	12	-2.33	0.00998	262	0.681	0.99	17667	1
P2RX3	-9.9	12	-2.33	0.00999	263	0.681	0.99	17666	1
FAM105A	-9.9	12	-2.32	0.01	264	0.682	0.99	17665	1
HIST1H2BK	-8.54	9	-2.31	0.0103	265	0.696	0.99	17664	1
FSTL4	-9.86	12	-2.31	0.0103	266	0.696	0.99	17663	1
CHID1	-9.84	12	-2.31	0.0104	267	0.7	0.99	17662	1
RMND5A	-9.83	12	-2.31	0.0105	268	0.704	0.989	17661	1
ASF1B	-9.8	12	-2.3	0.0108	269	0.712	0.989	17660	1
TAS2R41	-9.8	12	-2.3	0.0108	270	0.712	0.989	17659	1
TMEM125	-9.8	12	-2.3	0.0108	271	0.712	0.989	17658	1
OR6K2	-9.79	12	-2.3	0.0108	272	0.714	0.989	17657	1
SCYL1	-9.78	12	-2.29	0.0109	273	0.714	0.989	17656	1
ST7L	-8.47	9	-2.29	0.0109	274	0.714	0.989	17655	1
ATP6V0D1	-9.77	12	-2.29	0.0109	275	0.714	0.989	17654	1
MAST4	-9.76	12	-2.29	0.011	276	0.716	0.989	17653	1
PRSS22	-9.74	12	-2.28	0.0112	277	0.722	0.989	17652	1
FGF3	-9.73	12	-2.28	0.0113	278	0.724	0.989	17651	1
ANKRD36C	-9.73	12	-2.28	0.0113	279	0.724	0.989	17650	1
ZNF622	-9.72	12	-2.28	0.0113	280	0.726	0.989	17649	1
SERPINB13	-9.71	12	-2.28	0.0114	281	0.726	0.989	17648	1
CLIP2	-9.7	12	-2.27	0.0115	282	0.73	0.989	17647	1
STK31	-9.69	12	-2.27	0.0116	283	0.732	0.988	17646	1
MGEA5	-9.68	12	-2.27	0.0116	284	0.734	0.988	17645	1
GPLD1	-9.68	12	-2.27	0.0117	285	0.736	0.988	17644	1
SPEM1	-9.67	12	-2.26	0.0118	286	0.736	0.988	17643	1
RAB4B	-9.66	12	-2.26	0.0118	287	0.736	0.988	17642	1
GPS1	-9.65	12	-2.26	0.0119	288	0.741	0.988	17641	1
SAP130	-9.64	12	-2.26	0.012	289	0.741	0.988	17640	1
SH3GL3	-9.63	12	-2.26	0.012	290	0.741	0.988	17639	1
SFR1	-9.62	12	-2.25	0.0121	291	0.741	0.988	17638	1
IPO9	-9.61	12	-2.25	0.0122	292	0.741	0.988	17637	1
HSPB1	-9.61	12	-2.25	0.0123	293	0.741	0.988	17636	1
PDX1	-9.6	12	-2.25	0.0123	294	0.741	0.988	17635	1
TGIF2	-9.6	12	-2.25	0.0123	295	0.741	0.988	17634	1
MED27	-9.6	12	-2.25	0.0123	296	0.741	0.988	17633	1
TTC8	-9.59	12	-2.25	0.0123	297	0.741	0.988	17632	1
EXOC8	-9.59	12	-2.24	0.0124	298	0.741	0.988	17631	1
KLHDC10	-9.58	12	-2.24	0.0124	299	0.741	0.988	17630	1
AHSP	-9.58	12	-2.24	0.0124	300	0.741	0.988	17629	1
LTBP2	-9.58	12	-2.24	0.0125	301	0.741	0.988	17628	1
FANCD2	-9.58	12	-2.24	0.0125	302	0.741	0.988	17627	1
CDKL3	-9.55	12	-2.23	0.0127	303	0.752	0.987	17626	1
LYRM5	-4.77	3	-2.23	0.0128	304	0.754	0.987	17625	1
FBLN7	-9.51	12	-2.23	0.013	305	0.754	0.987	17624	1
RAD51AP1	-9.51	12	-2.22	0.0131	306	0.754	0.987	17623	1
IRX3	-9.51	12	-2.22	0.0131	307	0.754	0.987	17622	1
ADAMTS7	-9.5	12	-2.22	0.0131	308	0.754	0.987	17621	1
C2orf71	-9.5	12	-2.22	0.0131	309	0.754	0.987	17620	1
PRELP	-9.5	12	-2.22	0.0132	310	0.754	0.987	17619	1
DMD	-9.5	12	-2.22	0.0132	311	0.754	0.987	17618	1
DMTF1	-9.49	12	-2.22	0.0133	312	0.754	0.987	17617	1
ZNF407	-9.08	11	-2.22	0.0133	313	0.754	0.987	17616	1
RHNO1	-9.48	12	-2.22	0.0134	314	0.754	0.987	17615	1
C7orf31	-9.47	12	-2.22	0.0134	315	0.754	0.987	17614	1
TMPRSS2	-9.47	12	-2.21	0.0135	316	0.754	0.987	17613	1
DNAJB9	-9.46	12	-2.21	0.0135	317	0.754	0.987	17612	1
SLFNL1	-9.45	12	-2.21	0.0136	318	0.754	0.986	17611	1
PHF15	-9.44	12	-2.2	0.0137	319	0.754	0.986	17610	1
RMI1	-9.43	12	-2.2	0.0138	320	0.754	0.986	17609	1
TMEM30A	-9.43	12	-2.2	0.0138	321	0.754	0.986	17608	1
INO80E	-9.43	12	-2.2	0.0138	322	0.754	0.986	17607	1
QARS	-9.03	11	-2.2	0.0138	323	0.754	0.986	17606	1
PAMR1	-9.43	12	-2.2	0.0138	324	0.754	0.986	17605	1
PDZD2	-9.42	12	-2.2	0.0139	325	0.754	0.986	17604	1
FANCE	-9.42	12	-2.2	0.0139	326	0.754	0.986	17603	1
ZNF800	-9.42	12	-2.2	0.0139	327	0.754	0.986	17602	1
GPALPP1	-9.41	12	-2.2	0.014	328	0.754	0.986	17601	1
GPATCH11	-6.65	6	-2.2	0.014	329	0.754	0.986	17600	1
ACTR1A	-9.4	12	-2.2	0.014	330	0.754	0.986	17599	1
EID3	-9.4	12	-2.2	0.0141	331	0.754	0.986	17598	1
LRRN4CL	-9.4	12	-2.19	0.0141	332	0.754	0.986	17597	1
SMCHD1	-9.4	12	-2.19	0.0141	333	0.754	0.986	17596	1
NUGGC	-9.39	12	-2.19	0.0141	334	0.754	0.986	17595	1
EPPK1	-9.39	12	-2.19	0.0142	335	0.754	0.986	17594	1
FBXL13	-9.38	12	-2.19	0.0142	336	0.754	0.986	17593	1
OTOG	-9.38	12	-2.19	0.0142	337	0.754	0.986	17592	1
DPP7	-9.38	12	-2.19	0.0142	338	0.754	0.986	17591	1
RNF126	-9.37	12	-2.19	0.0143	339	0.759	0.986	17590	1
SLC4A2	-9.36	12	-2.19	0.0144	340	0.759	0.986	17589	1
DEFA5	-9.36	12	-2.19	0.0144	341	0.759	0.986	17588	1
UBFD1	-9.36	12	-2.18	0.0145	342	0.759	0.986	17587	1
CAPN15	-9.35	12	-2.18	0.0146	343	0.762	0.985	17586	1
KIAA1875	-9.34	12	-2.18	0.0146	344	0.762	0.985	17585	1
HSDL1	-9.34	12	-2.18	0.0147	345	0.763	0.985	17584	1
DNAJA3	-9.3	12	-2.17	0.015	346	0.774	0.985	17583	1
CPXM1	-9.3	12	-2.17	0.015	347	0.774	0.985	17582	1
SPATA7	-9.3	12	-2.17	0.015	348	0.774	0.985	17581	1
SLC4A3	-9.29	12	-2.17	0.0151	349	0.774	0.985	17580	1
PCBP2	-9.29	12	-2.17	0.0151	350	0.774	0.985	17579	1
CCDC51	-9.29	12	-2.17	0.0151	351	0.774	0.985	17578	1
EPB41L4A	-8.88	11	-2.16	0.0152	352	0.774	0.985	17577	1
BRCA2	-9.28	12	-2.16	0.0153	353	0.774	0.985	17576	1
PHACTR3	-9.27	12	-2.16	0.0153	354	0.774	0.985	17575	1
ADRBK1	-9.27	12	-2.16	0.0154	355	0.775	0.985	17574	1
VASN	-9.26	12	-2.16	0.0154	356	0.776	0.985	17573	1
ARHGEF18	-9.26	12	-2.16	0.0154	357	0.776	0.985	17572	1
PRRT4	-9.25	12	-2.16	0.0155	358	0.776	0.985	17571	1
TSTD1	-9.25	12	-2.16	0.0156	359	0.776	0.984	17570	1
LAMP1	-9.24	12	-2.15	0.0156	360	0.776	0.984	17569	1
N4BP2	-9.24	12	-2.15	0.0157	361	0.778	0.984	17568	1
SNX13	-9.23	12	-2.15	0.0157	362	0.778	0.984	17567	1
IPCEF1	-9.23	12	-2.15	0.0158	363	0.778	0.984	17566	1
SCGB2A1	-7.99	9	-2.15	0.0158	364	0.779	0.984	17565	1
EBP	-9.21	12	-2.15	0.016	365	0.782	0.984	17564	1
PM20D1	-9.2	12	-2.14	0.016	366	0.782	0.984	17563	1
DDX23	-9.2	12	-2.14	0.016	367	0.782	0.984	17562	1
PAFAH2	-9.2	12	-2.14	0.0161	368	0.782	0.984	17561	1
RPS23	-9.19	12	-2.14	0.0162	369	0.782	0.984	17560	1
HBE1	-9.18	12	-2.14	0.0162	370	0.782	0.984	17559	1
SLC26A11	-9.18	12	-2.14	0.0162	371	0.782	0.984	17558	1
PRPF38A	-8.79	11	-2.14	0.0162	372	0.782	0.984	17557	1
RAD51	-9.18	12	-2.14	0.0163	373	0.782	0.984	17556	1
ZNF668	-9.16	12	-2.13	0.0165	374	0.784	0.984	17555	1
USE1	-8.77	11	-2.13	0.0165	375	0.784	0.984	17554	1
ASCL4	-9.15	12	-2.13	0.0165	376	0.784	0.983	17553	1
CCDC74B	-6.47	6	-2.13	0.0165	377	0.784	0.983	17552	1
CWC22	-9.15	12	-2.13	0.0166	378	0.784	0.983	17551	1
MTA1	-9.15	12	-2.13	0.0166	379	0.784	0.983	17550	1
VTI1B	-9.14	12	-2.13	0.0166	380	0.784	0.983	17549	1
ASB2	-7.92	9	-2.13	0.0167	381	0.784	0.983	17548	1
HHIPL1	-9.13	12	-2.13	0.0167	382	0.786	0.983	17547	1
CLUAP1	-9.13	12	-2.12	0.0168	383	0.786	0.983	17546	1
FSIP1	-8.74	11	-2.12	0.0168	384	0.786	0.983	17545	1
TSSC4	-9.12	12	-2.12	0.0169	385	0.786	0.983	17544	1
DNAJB6	-7.88	9	-2.12	0.0171	386	0.792	0.983	17543	1
C2orf50	-9.1	12	-2.12	0.0171	387	0.792	0.983	17542	1
PACS1	-9.1	12	-2.12	0.0171	388	0.792	0.983	17541	1
OR10V1	-9.09	12	-2.12	0.0172	389	0.792	0.983	17540	1
OTUD7A	-9.09	12	-2.11	0.0172	390	0.792	0.983	17539	1
PDXK	-9.07	12	-2.11	0.0174	391	0.799	0.983	17538	1
PTX4	-9.07	12	-2.11	0.0175	392	0.799	0.983	17537	1
MYB	-9.06	12	-2.11	0.0176	393	0.802	0.982	17536	1
WDR90	-9.05	12	-2.11	0.0176	394	0.802	0.982	17535	1
OXTR	-9.05	12	-2.1	0.0177	395	0.803	0.982	17534	1
METTL9	-9.04	12	-2.1	0.0177	396	0.803	0.982	17533	1
CATSPER1	-9.04	12	-2.1	0.0178	397	0.803	0.982	17532	1
SERGEF	-9.03	12	-2.1	0.0178	398	0.803	0.982	17531	1
DSCC1	-9.03	12	-2.1	0.0179	399	0.803	0.982	17530	1
ZC2HC1C	-9.03	12	-2.1	0.0179	400	0.803	0.982	17529	1
OR10A2	-9.02	12	-2.1	0.018	401	0.803	0.982	17528	1
FLT3	-9.01	12	-2.1	0.0181	402	0.803	0.982	17527	1
LYL1	-9.01	12	-2.09	0.0181	403	0.803	0.982	17526	1
SBF1	-9.01	12	-2.09	0.0181	404	0.803	0.982	17525	1
R3HCC1	-9.01	12	-2.09	0.0181	405	0.803	0.982	17524	1
SPAG7	-9	12	-2.09	0.0182	406	0.806	0.982	17523	1
RTF1	-8.99	12	-2.09	0.0184	407	0.808	0.982	17522	1
CD200R1L	-8.99	12	-2.09	0.0184	408	0.808	0.982	17521	1
KIF1A	-8.98	12	-2.09	0.0185	409	0.809	0.982	17520	1
EIF1AX	-8.98	12	-2.09	0.0185	410	0.809	0.981	17519	1
NEDD1	-8.97	12	-2.08	0.0186	411	0.809	0.981	17518	1
DACT1	-8.97	12	-2.08	0.0186	412	0.809	0.981	17517	1
SIAH3	-8.97	12	-2.08	0.0186	413	0.809	0.981	17516	1
HGD	-7.76	9	-2.08	0.0187	414	0.809	0.981	17515	1
SCN7A	-8.95	12	-2.08	0.0188	415	0.812	0.981	17514	1
VAMP4	-8.95	12	-2.08	0.0188	416	0.812	0.981	17513	1
EBF2	-8.94	12	-2.08	0.0189	417	0.812	0.981	17512	1
BATF2	-8.94	12	-2.08	0.0189	418	0.812	0.981	17511	1
TUSC2	-8.92	12	-2.07	0.0191	419	0.819	0.981	17510	1
HAUS6	-8.91	12	-2.07	0.0193	420	0.819	0.981	17509	1
EXOSC2	-8.91	12	-2.07	0.0193	421	0.819	0.981	17508	1
C1orf159	-8.91	12	-2.07	0.0193	422	0.819	0.981	17507	1
MPLKIP	-8.91	12	-2.07	0.0194	423	0.821	0.981	17506	1
CPSF1	-8.9	12	-2.06	0.0195	424	0.824	0.981	17505	1
POLR1D	-8.89	12	-2.06	0.0196	425	0.824	0.98	17504	1
ZXDA	-6.28	6	-2.06	0.0196	426	0.824	0.98	17503	1
SRCAP	-8.88	12	-2.06	0.0197	427	0.826	0.98	17502	1
TSKU	-8.87	12	-2.06	0.0197	428	0.826	0.98	17501	1
FAM122B	-8.87	12	-2.06	0.0199	429	0.826	0.98	17500	1
ESRP2	-8.86	12	-2.06	0.0199	430	0.826	0.98	17499	1
RPS6KA6	-8.86	12	-2.05	0.0199	431	0.826	0.98	17498	1
HYAL4	-8.86	12	-2.05	0.02	432	0.826	0.98	17497	1
TOPBP1	-8.85	12	-2.05	0.02	433	0.826	0.98	17496	1
FTSJ3	-8.47	11	-2.05	0.02	434	0.826	0.98	17495	1
OR10G2	-8.85	12	-2.05	0.02	435	0.826	0.98	17494	1
MAP1A	-8.84	12	-2.05	0.0202	436	0.828	0.98	17493	1
RFC3	-8.84	12	-2.05	0.0202	437	0.828	0.98	17492	1
MEAF6	-8.84	12	-2.05	0.0202	438	0.828	0.98	17491	1
GPR143	-8.83	12	-2.05	0.0203	439	0.828	0.98	17490	1
WEE2	-8.83	12	-2.05	0.0203	440	0.828	0.98	17489	1
TRAP1	-8.82	12	-2.04	0.0205	441	0.832	0.98	17488	1
GORAB	-8.81	12	-2.04	0.0206	442	0.835	0.979	17487	1
VPS39	-8.8	12	-2.04	0.0206	443	0.835	0.979	17486	1
IRF5	-8.8	12	-2.04	0.0208	444	0.838	0.979	17485	1
NXF1	-8.42	11	-2.04	0.0208	445	0.839	0.979	17484	1
PWWP2A	-8.78	12	-2.04	0.0209	446	0.839	0.979	17483	1
SPATA22	-8.77	12	-2.03	0.021	447	0.839	0.979	17482	1
ZSCAN25	-8.76	12	-2.03	0.0212	448	0.839	0.979	17481	1
RTN4RL2	-8.76	12	-2.03	0.0212	449	0.839	0.979	17480	1
CNNM1	-8.76	12	-2.03	0.0213	450	0.839	0.979	17479	1
TMEM230	-8.75	12	-2.03	0.0213	451	0.839	0.979	17478	1
RNPEPL1	-8.75	12	-2.03	0.0214	452	0.839	0.979	17477	1
ZCCHC12	-8.75	12	-2.03	0.0214	453	0.839	0.979	17476	1
IER3IP1	-8.75	12	-2.03	0.0214	454	0.839	0.979	17475	1
ATL2	-8.74	12	-2.02	0.0215	455	0.839	0.979	17474	1
ZNF704	-8.73	12	-2.02	0.0216	456	0.839	0.978	17473	1
NDRG4	-8.73	12	-2.02	0.0216	457	0.839	0.978	17472	1
VWA8	-8.73	12	-2.02	0.0216	458	0.839	0.978	17471	1
GNPAT	-8.36	11	-2.02	0.0216	459	0.839	0.978	17470	1
RPS6KA4	-8.73	12	-2.02	0.0217	460	0.839	0.978	17469	1
CYHR1	-8.72	12	-2.02	0.0217	461	0.839	0.978	17468	1
RPL28	-8.72	12	-2.02	0.0218	462	0.839	0.978	17467	1
HTR3A	-8.72	12	-2.02	0.0218	463	0.839	0.978	17466	1
PLSCR4	-8.72	12	-2.02	0.0218	464	0.839	0.978	17465	1
DSCAM	-8.72	12	-2.02	0.0218	465	0.839	0.978	17464	1
SLC35E3	-8.72	12	-2.02	0.0218	466	0.839	0.978	17463	1
ACRV1	-8.71	12	-2.02	0.0218	467	0.839	0.978	17462	1
ZDHHC5	-8.71	12	-2.02	0.0219	468	0.839	0.978	17461	1
ACTB	-7.54	9	-2.01	0.022	469	0.839	0.978	17460	1
FUOM	-8.7	12	-2.01	0.022	470	0.839	0.978	17459	1
IMPAD1	-8.7	12	-2.01	0.0221	471	0.841	0.978	17458	1
DEPDC5	-8.69	12	-2.01	0.0222	472	0.842	0.978	17457	1
C6orf15	-8.69	12	-2.01	0.0222	473	0.842	0.978	17456	1
IKBKAP	-8.68	12	-2.01	0.0223	474	0.845	0.978	17455	1
SNX31	-8.67	12	-2.01	0.0224	475	0.847	0.978	17454	1
TGFB1I1	-8.65	12	-2	0.0227	476	0.849	0.977	17453	1
AUP1	-8.65	12	-2	0.0227	477	0.849	0.977	17452	1
CTRB1	-8.65	12	-2	0.0228	478	0.849	0.977	17451	1
UBE2I	-8.65	12	-2	0.0228	479	0.849	0.977	17450	1
MORC2	-7.49	9	-2	0.0228	480	0.849	0.977	17449	1
TRIM64B	-4.32	3	-2	0.0228	481	0.849	0.977	17448	1
TRA2A	-8.64	12	-2	0.0229	482	0.851	0.977	17447	1
LSM6	-7.47	9	-1.99	0.023	483	0.851	0.977	17446	1
TBC1D30	-8.63	12	-1.99	0.0231	484	0.851	0.977	17445	1
GFRA2	-8.62	12	-1.99	0.0231	485	0.851	0.977	17444	1
SLC22A10	-7.47	9	-1.99	0.0231	486	0.851	0.977	17443	1
SLC25A48	-8.62	12	-1.99	0.0231	487	0.851	0.977	17442	1
ABHD12B	-8.62	12	-1.99	0.0232	488	0.851	0.977	17441	1
LFNG	-8.61	12	-1.99	0.0233	489	0.853	0.977	17440	1
SP9	-8.61	12	-1.99	0.0233	490	0.854	0.977	17439	1
NFE2L1	-8.59	12	-1.99	0.0235	491	0.856	0.976	17438	1
KRT6A	-6.08	6	-1.99	0.0235	492	0.856	0.976	17437	1
STX1A	-8.59	12	-1.99	0.0236	493	0.856	0.976	17436	1
PNLIP	-8.59	12	-1.98	0.0236	494	0.856	0.976	17435	1
XRN1	-8.59	12	-1.98	0.0236	495	0.856	0.976	17434	1
MAP4K3	-8.58	12	-1.98	0.0237	496	0.856	0.976	17433	1
RABEP2	-8.58	12	-1.98	0.0238	497	0.857	0.976	17432	1
MOG	-8.57	12	-1.98	0.0239	498	0.861	0.976	17431	1
ISCA2	-8.56	12	-1.98	0.024	499	0.861	0.976	17430	1
NT5C1A	-8.56	12	-1.98	0.024	500	0.861	0.976	17429	1
OR1F1	-8.55	12	-1.97	0.0242	501	0.863	0.976	17428	1
CADM3	-8.55	12	-1.97	0.0242	502	0.863	0.976	17427	1
PATL1	-8.54	12	-1.97	0.0244	503	0.866	0.976	17426	1
LINC00692	-8.53	12	-1.97	0.0244	504	0.866	0.976	17425	1
SLC35G2	-8.53	12	-1.97	0.0244	505	0.866	0.976	17424	1
C15orf62	-8.53	12	-1.97	0.0245	506	0.868	0.976	17423	1
RAD54L2	-8.52	12	-1.97	0.0246	507	0.869	0.975	17422	1
UBE2S	-8.51	12	-1.96	0.0248	508	0.875	0.975	17421	1
RAB2A	-8.49	12	-1.96	0.025	509	0.88	0.975	17420	1
FMO6P	-8.49	12	-1.96	0.0251	510	0.88	0.975	17419	1
OR7A17	-8.48	12	-1.96	0.0252	511	0.88	0.975	17418	1
HK3	-8.48	12	-1.96	0.0252	512	0.88	0.975	17417	1
CTSC	-7.35	9	-1.96	0.0252	513	0.88	0.975	17416	1
PSMG1	-8.46	12	-1.95	0.0254	514	0.882	0.975	17415	1
ATP6V1H	-8.46	12	-1.95	0.0255	515	0.882	0.975	17414	1
MNX1	-8.46	12	-1.95	0.0255	516	0.882	0.974	17413	1
URGCP	-8.46	12	-1.95	0.0256	517	0.882	0.974	17412	1
ETAA1	-8.45	12	-1.95	0.0257	518	0.882	0.974	17411	1
TMEM257	-7.32	9	-1.95	0.0257	519	0.882	0.974	17410	1
TGFA	-8.44	12	-1.95	0.0258	520	0.882	0.974	17409	1
U2AF1	-8.44	12	-1.95	0.0258	521	0.882	0.974	17408	1
PRSS8	-8.44	12	-1.95	0.0258	522	0.882	0.974	17407	1
CBX1	-8.44	12	-1.95	0.0258	523	0.882	0.974	17406	1
SEC11A	-8.44	12	-1.95	0.0258	524	0.882	0.974	17405	1
PDIA2	-8.42	12	-1.94	0.0262	525	0.893	0.974	17404	1
STXBP1	-8.42	12	-1.94	0.0262	526	0.893	0.974	17403	1
ORAI3	-8.41	12	-1.94	0.0263	527	0.893	0.974	17402	1
CCNF	-7.28	9	-1.94	0.0263	528	0.893	0.974	17401	1
ADCY3	-8.39	12	-1.93	0.0265	529	0.898	0.973	17400	1
TGM2	-8.39	12	-1.93	0.0266	530	0.898	0.973	17399	1
ARHGAP44	-8.39	12	-1.93	0.0267	531	0.898	0.973	17398	1
UBE2E3	-8.39	12	-1.93	0.0267	532	0.898	0.973	17397	1
USP49	-8.39	12	-1.93	0.0267	533	0.898	0.973	17396	1
FHDC1	-8.38	12	-1.93	0.0268	534	0.898	0.973	17395	1
VPS8	-8.38	12	-1.93	0.0268	535	0.899	0.973	17394	1
NLE1	-8.37	12	-1.93	0.0269	536	0.899	0.973	17393	1
GYPA	-7.25	9	-1.93	0.027	537	0.899	0.973	17392	1
MGRN1	-7.64	10	-1.93	0.027	538	0.899	0.973	17391	1
VBP1	-8.36	12	-1.93	0.0271	539	0.901	0.973	17390	1
MBD6	-8.36	12	-1.92	0.0271	540	0.901	0.973	17389	1
USP48	-8.35	12	-1.92	0.0273	541	0.904	0.973	17388	1
ERCC6L2	-8.35	12	-1.92	0.0273	542	0.904	0.973	17387	1
ABCA13	-8.34	12	-1.92	0.0274	543	0.904	0.973	17386	1
RDH16	-8.34	12	-1.92	0.0274	544	0.904	0.973	17385	1
ZNHIT1	-8.33	12	-1.92	0.0275	545	0.904	0.972	17384	1
HNRNPH1	-8.33	12	-1.92	0.0276	546	0.904	0.972	17383	1
ALG9	-8.32	12	-1.91	0.0278	547	0.904	0.972	17382	1
ZKSCAN1	-8.32	12	-1.91	0.0278	548	0.904	0.972	17381	1
CENPE	-8.32	12	-1.91	0.0278	549	0.904	0.972	17380	1
WARS2	-8.31	12	-1.91	0.0278	550	0.904	0.972	17379	1
ZFP57	-8.31	12	-1.91	0.0279	551	0.904	0.972	17378	1
ZNF771	-8.31	12	-1.91	0.0279	552	0.904	0.972	17377	1
FBXL6	-8.31	12	-1.91	0.028	553	0.904	0.972	17376	1
ATR	-8.31	12	-1.91	0.028	554	0.904	0.972	17375	1
IFI35	-8.3	12	-1.91	0.028	555	0.904	0.972	17374	1
TTLL10	-8.3	12	-1.91	0.0281	556	0.904	0.972	17373	1
GTF2F2	-7.19	9	-1.91	0.0281	557	0.904	0.972	17372	1
ABCC11	-8.3	12	-1.91	0.0281	558	0.904	0.972	17371	1
TCEAL7	-8.3	12	-1.91	0.0282	559	0.904	0.972	17370	1
DPP9	-8.29	12	-1.91	0.0282	560	0.904	0.972	17369	1
RNF103	-8.29	12	-1.91	0.0283	561	0.905	0.972	17368	1
KRT39	-8.28	12	-1.91	0.0284	562	0.905	0.972	17367	1
BTD	-8.28	12	-1.9	0.0284	563	0.905	0.972	17366	1
GPRC5B	-8.27	12	-1.9	0.0286	564	0.907	0.971	17365	1
C7orf61	-8.27	12	-1.9	0.0286	565	0.907	0.971	17364	1
DUSP11	-8.26	12	-1.9	0.0287	566	0.909	0.971	17363	1
MAPK1IP1L	-8.26	12	-1.9	0.0288	567	0.911	0.971	17362	1
APPBP2	-8.25	12	-1.9	0.0289	568	0.911	0.971	17361	1
TFPI2	-8.25	12	-1.9	0.0289	569	0.911	0.971	17360	1
ADIRF	-8.25	12	-1.9	0.029	570	0.912	0.971	17359	1
SIRPB2	-8.24	12	-1.89	0.029	571	0.912	0.971	17358	1
CHRNG	-8.24	12	-1.89	0.0291	572	0.912	0.971	17357	1
ARAP1	-8.22	12	-1.89	0.0294	573	0.912	0.971	17356	1
PPP1R7	-8.22	12	-1.89	0.0294	574	0.912	0.971	17355	1
DRG1	-8.22	12	-1.89	0.0295	575	0.912	0.971	17354	1
TMEM253	-8.21	12	-1.89	0.0296	576	0.912	0.97	17353	1
TSC2	-8.21	12	-1.89	0.0296	577	0.912	0.97	17352	1
HFE2	-8.21	12	-1.89	0.0297	578	0.912	0.97	17351	1
MANSC4	-8.21	12	-1.89	0.0297	579	0.912	0.97	17350	1
RPA4	-8.21	12	-1.88	0.0297	580	0.912	0.97	17349	1
FBXL14	-8.2	12	-1.88	0.0297	581	0.912	0.97	17348	1
WDR36	-8.2	12	-1.88	0.0298	582	0.912	0.97	17347	1
MSTO1	-8.2	12	-1.88	0.0298	583	0.912	0.97	17346	1
GSG1L	-8.2	12	-1.88	0.0298	584	0.912	0.97	17345	1
PRSS21	-8.2	12	-1.88	0.0298	585	0.912	0.97	17344	1
PDE6G	-8.19	12	-1.88	0.0299	586	0.912	0.97	17343	1
PSG3	-4.1	3	-1.88	0.0299	587	0.912	0.97	17342	1
SPTBN1	-8.19	12	-1.88	0.03	588	0.912	0.97	17341	1
UBE2T	-8.18	12	-1.88	0.0301	589	0.912	0.97	17340	1
ITGA11	-8.18	12	-1.88	0.0301	590	0.912	0.97	17339	1
NDNL2	-8.18	12	-1.88	0.0302	591	0.912	0.97	17338	1
IQCK	-8.18	12	-1.88	0.0302	592	0.912	0.97	17337	1
RAC2	-8.18	12	-1.88	0.0302	593	0.912	0.97	17336	1
GFRA4	-8.18	12	-1.88	0.0302	594	0.912	0.97	17335	1
DNMT3L	-8.17	12	-1.88	0.0303	595	0.912	0.97	17334	1
RNF19A	-8.17	12	-1.88	0.0304	596	0.914	0.97	17333	1
PGM3	-8.16	12	-1.87	0.0305	597	0.916	0.969	17332	1
WDSUB1	-8.16	12	-1.87	0.0306	598	0.916	0.969	17331	1
BTG3	-8.15	12	-1.87	0.0307	599	0.92	0.969	17330	1
UTP11L	-8.14	12	-1.87	0.0309	600	0.921	0.969	17329	1
POP7	-8.14	12	-1.87	0.031	601	0.921	0.969	17328	1
HIST1H1D	-8.13	12	-1.87	0.031	602	0.921	0.969	17327	1
WDR4	-8.13	12	-1.87	0.031	603	0.921	0.969	17326	1
C21orf128	-7.04	9	-1.86	0.0311	604	0.921	0.969	17325	1
RHEB	-8.12	12	-1.86	0.0312	605	0.921	0.969	17324	1
CACNG3	-8.12	12	-1.86	0.0312	606	0.921	0.969	17323	1
UPF2	-8.12	12	-1.86	0.0312	607	0.921	0.969	17322	1
SLC34A1	-8.12	12	-1.86	0.0313	608	0.922	0.969	17321	1
ACTRT1	-8.11	12	-1.86	0.0314	609	0.922	0.969	17320	1
SNRNP27	-7.77	11	-1.86	0.0314	610	0.922	0.969	17319	1
ZNF34	-8.11	12	-1.86	0.0315	611	0.922	0.969	17318	1
ZNF19	-8.11	12	-1.86	0.0315	612	0.922	0.969	17317	1
SCAF8	-8.1	12	-1.86	0.0317	613	0.922	0.968	17316	1
MBD2	-8.09	12	-1.86	0.0317	614	0.922	0.968	17315	1
FAM20C	-8.09	12	-1.86	0.0317	615	0.922	0.968	17314	1
TRIP13	-8.09	12	-1.86	0.0317	616	0.922	0.968	17313	1
MEDAG	-8.09	12	-1.86	0.0318	617	0.922	0.968	17312	1
ARX	-8.09	12	-1.85	0.0319	618	0.922	0.968	17311	1
EFNB2	-8.08	12	-1.85	0.0319	619	0.922	0.968	17310	1
SRL	-7	9	-1.85	0.032	620	0.922	0.968	17309	1
GTF3C4	-7	9	-1.85	0.032	621	0.922	0.968	17308	1
TMTC1	-8.08	12	-1.85	0.032	622	0.922	0.968	17307	1
CXorf61	-8.07	12	-1.85	0.0322	623	0.926	0.968	17306	1
RNF180	-8.06	12	-1.85	0.0324	624	0.926	0.968	17305	1
KIFC1	-8.05	12	-1.85	0.0325	625	0.926	0.968	17304	1
PMPCB	-8.05	12	-1.85	0.0325	626	0.926	0.967	17303	1
DYNLRB2	-8.05	12	-1.84	0.0326	627	0.926	0.967	17302	1
WNT8A	-8.05	12	-1.84	0.0326	628	0.926	0.967	17301	1
SIGIRR	-8.04	12	-1.84	0.0327	629	0.926	0.967	17300	1
C2orf53	-8.04	12	-1.84	0.0327	630	0.926	0.967	17299	1
MYOZ3	-8.04	12	-1.84	0.0328	631	0.926	0.967	17298	1
ARIH1	-8.03	12	-1.84	0.0329	632	0.926	0.967	17297	1
YPEL5	-8.03	12	-1.84	0.0329	633	0.926	0.967	17296	1
GPR27	-8.02	12	-1.84	0.033	634	0.926	0.967	17295	1
ARID4B	-8.02	12	-1.84	0.0331	635	0.926	0.967	17294	1
PDGFA	-8.02	12	-1.84	0.0331	636	0.926	0.967	17293	1
IL1RN	-8.02	12	-1.84	0.0331	637	0.926	0.967	17292	1
OR13G1	-8.02	12	-1.84	0.0332	638	0.926	0.967	17291	1
CORT	-5.67	6	-1.84	0.0332	639	0.926	0.967	17290	1
NCOA2	-8.02	12	-1.84	0.0332	640	0.926	0.967	17289	1
SF3B4	-8.01	12	-1.83	0.0333	641	0.926	0.967	17288	1
AASDHPPT	-8.01	12	-1.83	0.0334	642	0.926	0.967	17287	1
PAGE3	-8	12	-1.83	0.0334	643	0.926	0.967	17286	1
HPD	-8	12	-1.83	0.0335	644	0.926	0.966	17285	1
GATAD1	-8	12	-1.83	0.0335	645	0.926	0.966	17284	1
METAP1D	-8	12	-1.83	0.0335	646	0.926	0.966	17283	1
METTL5	-7.99	12	-1.83	0.0337	647	0.926	0.966	17282	1
CLPTM1	-7.99	12	-1.83	0.0338	648	0.926	0.966	17281	1
FAM179B	-7.98	12	-1.83	0.0338	649	0.926	0.966	17280	1
FUCA1	-7.98	12	-1.83	0.0338	650	0.926	0.966	17279	1
CHPF	-7.98	12	-1.83	0.0338	651	0.926	0.966	17278	1
NDRG1	-7.98	12	-1.83	0.0339	652	0.926	0.966	17277	1
ZNF30	-7.98	12	-1.83	0.0339	653	0.926	0.966	17276	1
MRFAP1L1	-7.98	12	-1.83	0.0339	654	0.926	0.966	17275	1
PPP1R9A	-7.98	12	-1.83	0.0339	655	0.926	0.966	17274	1
FAM221A	-7.28	10	-1.83	0.034	656	0.926	0.966	17273	1
TLR8	-7.97	12	-1.82	0.0341	657	0.926	0.966	17272	1
WDR5	-7.97	12	-1.82	0.0341	658	0.926	0.966	17271	1
ZMYM5	-7.96	12	-1.82	0.0342	659	0.926	0.966	17270	1
HDDC2	-7.96	12	-1.82	0.0343	660	0.926	0.966	17269	1
SLC45A4	-7.96	12	-1.82	0.0343	661	0.926	0.966	17268	1
PSMD13	-7.95	12	-1.82	0.0344	662	0.926	0.966	17267	1
BPHL	-7.95	12	-1.82	0.0344	663	0.926	0.966	17266	1
RQCD1	-7.95	12	-1.82	0.0345	664	0.926	0.966	17265	1
RND3	-7.95	12	-1.82	0.0345	665	0.926	0.965	17264	1
PILRA	-7.94	12	-1.82	0.0347	666	0.926	0.965	17263	1
ACSM3	-7.94	12	-1.82	0.0347	667	0.926	0.965	17262	1
PKM	-7.94	12	-1.82	0.0347	668	0.926	0.965	17261	1
PIK3IP1	-7.94	12	-1.82	0.0347	669	0.926	0.965	17260	1
USP37	-7.94	12	-1.82	0.0347	670	0.926	0.965	17259	1
RNF40	-7.94	12	-1.82	0.0348	671	0.926	0.965	17258	1
HAAO	-7.94	12	-1.82	0.0348	672	0.926	0.965	17257	1
CCL25	-7.94	12	-1.82	0.0348	673	0.926	0.965	17256	1
CNEP1R1	-7.93	12	-1.81	0.0349	674	0.927	0.965	17255	1
CCDC64B	-7.93	12	-1.81	0.0349	675	0.927	0.965	17254	1
OLR1	-7.92	12	-1.81	0.0351	676	0.929	0.965	17253	1
SAMHD1	-7.91	12	-1.81	0.0352	677	0.929	0.965	17252	1
RBM6	-7.91	12	-1.81	0.0353	678	0.929	0.965	17251	1
VAPB	-7.91	12	-1.81	0.0353	679	0.929	0.965	17250	1
GGCX	-7.91	12	-1.81	0.0354	680	0.929	0.965	17249	1
PCBP1	-7.9	12	-1.81	0.0354	681	0.929	0.965	17248	1
ACADS	-7.9	12	-1.81	0.0354	682	0.929	0.965	17247	1
PRL	-7.9	12	-1.81	0.0354	683	0.929	0.965	17246	1
ACSM2B	-7.9	12	-1.81	0.0355	684	0.929	0.965	17245	1
CD2AP	-7.9	12	-1.81	0.0355	685	0.929	0.965	17244	1
KCNV1	-7.89	12	-1.8	0.0356	686	0.93	0.964	17243	1
PPIL4	-7.89	12	-1.8	0.0357	687	0.93	0.964	17242	1
CREB3L4	-7.89	12	-1.8	0.0357	688	0.93	0.964	17241	1
ARHGAP26	-7.88	12	-1.8	0.0359	689	0.933	0.964	17240	1
MDC1	-7.88	12	-1.8	0.0359	690	0.933	0.964	17239	1
FAM105B	-6.82	9	-1.8	0.036	691	0.933	0.964	17238	1
JPH1	-7.87	12	-1.8	0.036	692	0.933	0.964	17237	1
SPEF2	-7.87	12	-1.8	0.0361	693	0.935	0.964	17236	1
N4BP2L2	-7.86	12	-1.8	0.0362	694	0.936	0.964	17235	1
VPS36	-7.86	12	-1.79	0.0363	695	0.937	0.964	17234	1
SMEK2	-7.85	12	-1.79	0.0364	696	0.938	0.964	17233	1
TNRC6C	-7.85	12	-1.79	0.0365	697	0.938	0.964	17232	1
CDK1	-7.51	11	-1.79	0.0366	698	0.938	0.963	17231	1
FTCD	-7.84	12	-1.79	0.0367	699	0.938	0.963	17230	1
DNAJB12	-7.84	12	-1.79	0.0368	700	0.938	0.963	17229	1
KCNH2	-7.83	12	-1.79	0.0368	701	0.938	0.963	17228	1
MRPL22	-7.83	12	-1.79	0.0368	702	0.938	0.963	17227	1
RSPO2	-7.83	12	-1.79	0.0369	703	0.938	0.963	17226	1
NPY4R	-7.83	12	-1.79	0.0369	704	0.938	0.963	17225	1
ALS2CR12	-7.83	12	-1.79	0.0369	705	0.938	0.963	17224	1
MAP4	-7.83	12	-1.79	0.037	706	0.938	0.963	17223	1
MMP14	-7.82	12	-1.79	0.0371	707	0.938	0.963	17222	1
FLYWCH1	-7.82	12	-1.78	0.0371	708	0.938	0.963	17221	1
ABCC6	-7.82	12	-1.78	0.0371	709	0.938	0.963	17220	1
NRXN1	-7.82	12	-1.78	0.0372	710	0.938	0.963	17219	1
MAGEA12	-7.81	12	-1.78	0.0373	711	0.938	0.963	17218	1
GNRH2	-7.81	12	-1.78	0.0373	712	0.938	0.963	17217	1
FABP9	-7.81	12	-1.78	0.0373	713	0.938	0.963	17216	1
DCLRE1A	-7.8	12	-1.78	0.0375	714	0.938	0.963	17215	1
XPO1	-7.12	10	-1.78	0.0375	715	0.938	0.963	17214	1
JAK1	-7.8	12	-1.78	0.0376	716	0.938	0.962	17213	1
KCTD14	-7.8	12	-1.78	0.0376	717	0.938	0.962	17212	1
PCIF1	-7.8	12	-1.78	0.0376	718	0.938	0.962	17211	1
HTRA2	-7.8	12	-1.78	0.0376	719	0.939	0.962	17210	1
MUS81	-7.79	12	-1.78	0.0377	720	0.94	0.962	17209	1
IFI16	-7.77	12	-1.77	0.0382	721	0.948	0.962	17208	1
FLNC	-7.77	12	-1.77	0.0382	722	0.948	0.962	17207	1
RGS11	-7.77	12	-1.77	0.0382	723	0.948	0.962	17206	1
MRAP2	-7.76	12	-1.77	0.0383	724	0.95	0.962	17205	1
DLG4	-7.76	12	-1.77	0.0384	725	0.95	0.962	17204	1
TAS2R43	-3.88	3	-1.77	0.0386	726	0.954	0.961	17203	1
MPRIP	-7.41	11	-1.76	0.0388	727	0.954	0.961	17202	1
ENOX2	-7.74	12	-1.76	0.0389	728	0.954	0.961	17201	1
DSG4	-7.74	12	-1.76	0.0389	729	0.954	0.961	17200	1
RPL3L	-7.73	12	-1.76	0.0391	730	0.954	0.961	17199	1
TMC3	-7.73	12	-1.76	0.0392	731	0.954	0.961	17198	1
HIVEP2	-7.72	12	-1.76	0.0392	732	0.954	0.961	17197	1
OR4A5	-5.46	6	-1.76	0.0393	733	0.954	0.961	17196	1
IFITM5	-7.72	12	-1.76	0.0394	734	0.954	0.961	17195	1
EFNA3	-7.72	12	-1.76	0.0394	735	0.954	0.961	17194	1
PNLIPRP3	-7.71	12	-1.76	0.0394	736	0.954	0.961	17193	1
GALNT16	-7.71	12	-1.76	0.0394	737	0.954	0.961	17192	1
ACN9	-7.71	12	-1.76	0.0395	738	0.954	0.96	17191	1
PTPRB	-7.71	12	-1.76	0.0395	739	0.954	0.96	17190	1
A4GNT	-7.71	12	-1.76	0.0395	740	0.954	0.96	17189	1
DSE	-7.71	12	-1.76	0.0396	741	0.954	0.96	17188	1
TTC9C	-7.7	12	-1.75	0.0397	742	0.954	0.96	17187	1
CSE1L	-7.7	12	-1.75	0.0398	743	0.954	0.96	17186	1
RANBP1	-7.69	12	-1.75	0.0399	744	0.954	0.96	17185	1
RGS3	-7.69	12	-1.75	0.0399	745	0.954	0.96	17184	1
NAA60	-7.69	12	-1.75	0.0399	746	0.954	0.96	17183	1
FAM129C	-7.69	12	-1.75	0.0399	747	0.954	0.96	17182	1
FBXW7	-7.69	12	-1.75	0.04	748	0.954	0.96	17181	1
ATP6V0E2	-7.69	12	-1.75	0.04	749	0.954	0.96	17180	1
ZNF251	-7.68	12	-1.75	0.0402	750	0.954	0.96	17179	1
DEFB130	-6.65	9	-1.75	0.0402	751	0.954	0.96	17178	1
CNIH2	-7.68	12	-1.75	0.0402	752	0.954	0.96	17177	1
MYLK2	-7.68	12	-1.75	0.0403	753	0.954	0.96	17176	1
ERI2	-7.67	12	-1.75	0.0404	754	0.954	0.96	17175	1
CACNA1D	-7.67	12	-1.75	0.0404	755	0.954	0.96	17174	1
AVL9	-7.67	12	-1.75	0.0404	756	0.954	0.96	17173	1
TAS1R3	-7.67	12	-1.75	0.0404	757	0.954	0.96	17172	1
PSPC1	-7.67	12	-1.75	0.0405	758	0.954	0.96	17171	1
POLD3	-7.67	12	-1.74	0.0405	759	0.954	0.96	17170	1
RPL32	-3.83	3	-1.74	0.0405	760	0.954	0.959	17169	1
LIN37	-7.66	12	-1.74	0.0406	761	0.954	0.959	17168	1
OR6C68	-7.66	12	-1.74	0.0407	762	0.954	0.959	17167	1
CPQ	-7.66	12	-1.74	0.0407	763	0.954	0.959	17166	1
PPP1R3A	-7.66	12	-1.74	0.0408	764	0.954	0.959	17165	1
MYBBP1A	-7.65	12	-1.74	0.0408	765	0.954	0.959	17164	1
DLX6	-7.65	12	-1.74	0.0409	766	0.954	0.959	17163	1
GRID2IP	-7.65	12	-1.74	0.0409	767	0.954	0.959	17162	1
LRRC3	-7.65	12	-1.74	0.0409	768	0.954	0.959	17161	1
KIF13A	-7.65	12	-1.74	0.0409	769	0.954	0.959	17160	1
RAD17	-7.64	12	-1.74	0.0411	770	0.957	0.959	17159	1
SOWAHA	-7.64	12	-1.74	0.0412	771	0.957	0.959	17158	1
ZNF619	-7.63	12	-1.74	0.0412	772	0.957	0.959	17157	1
GDF10	-7.63	12	-1.74	0.0412	773	0.957	0.959	17156	1
KIAA0226	-7.63	12	-1.74	0.0414	774	0.958	0.959	17155	1
DEPTOR	-7.62	12	-1.73	0.0415	775	0.96	0.958	17154	1
L3HYPDH	-7.61	12	-1.73	0.0417	776	0.96	0.958	17153	1
LALBA	-7.61	12	-1.73	0.0418	777	0.96	0.958	17152	1
NAE1	-7.61	12	-1.73	0.0418	778	0.96	0.958	17151	1
EPS8	-7.61	12	-1.73	0.0418	779	0.96	0.958	17150	1
TNFRSF11A	-7.61	12	-1.73	0.0418	780	0.96	0.958	17149	1
OIP5	-7.61	12	-1.73	0.0418	781	0.96	0.958	17148	1
LONRF3	-7.6	12	-1.73	0.042	782	0.96	0.958	17147	1
FOXM1	-7.6	12	-1.73	0.042	783	0.96	0.958	17146	1
GSTA5	-6.58	9	-1.73	0.0421	784	0.96	0.958	17145	1
SSBP1	-7.6	12	-1.73	0.0421	785	0.96	0.958	17144	1
SCG2	-7.59	12	-1.73	0.0422	786	0.96	0.958	17143	1
OR10AD1	-7.59	12	-1.73	0.0422	787	0.96	0.958	17142	1
PROKR2	-7.59	12	-1.73	0.0422	788	0.96	0.958	17141	1
WDR7	-7.59	12	-1.72	0.0423	789	0.96	0.958	17140	1
HACE1	-7.59	12	-1.72	0.0424	790	0.96	0.958	17139	1
CAMKK1	-7.58	12	-1.72	0.0424	791	0.96	0.958	17138	1
MYBPH	-7.58	12	-1.72	0.0425	792	0.96	0.958	17137	1
MED8	-7.58	12	-1.72	0.0426	793	0.96	0.957	17136	1
DTX2	-7.57	12	-1.72	0.0427	794	0.96	0.957	17135	1
ALPK1	-7.57	12	-1.72	0.0428	795	0.96	0.957	17134	1
OTUD4	-7.57	12	-1.72	0.0428	796	0.96	0.957	17133	1
BTG4	-7.56	12	-1.72	0.0429	797	0.96	0.957	17132	1
KIAA1456	-7.56	12	-1.72	0.0429	798	0.96	0.957	17131	1
EXOC6B	-7.56	12	-1.72	0.0429	799	0.96	0.957	17130	1
GALNT15	-7.56	12	-1.72	0.0429	800	0.96	0.957	17129	1
TOR4A	-7.56	12	-1.72	0.043	801	0.96	0.957	17128	1
BHLHE41	-7.56	12	-1.72	0.043	802	0.96	0.957	17127	1
LRGUK	-7.56	12	-1.72	0.043	803	0.96	0.957	17126	1
TUBGCP5	-7.56	12	-1.72	0.0431	804	0.96	0.957	17125	1
SLC28A3	-7.55	12	-1.72	0.0432	805	0.961	0.957	17124	1
GOLGA4	-7.55	12	-1.71	0.0432	806	0.961	0.957	17123	1
KLHL34	-7.55	12	-1.71	0.0433	807	0.961	0.957	17122	1
DRD2	-7.54	12	-1.71	0.0434	808	0.962	0.957	17121	1
ANAPC13	-7.54	12	-1.71	0.0435	809	0.965	0.956	17120	1
LYSMD1	-7.53	12	-1.71	0.0436	810	0.965	0.956	17119	1
SLC6A19	-7.53	12	-1.71	0.0437	811	0.966	0.956	17118	1
BPTF	-7.52	12	-1.71	0.0439	812	0.967	0.956	17117	1
MDS2	-7.52	12	-1.71	0.0439	813	0.967	0.956	17116	1
POFUT1	-7.52	12	-1.71	0.0439	814	0.967	0.956	17115	1
RAD54B	-7.19	11	-1.71	0.0441	815	0.969	0.956	17114	1
DNTTIP1	-7.5	12	-1.7	0.0444	816	0.973	0.956	17113	1
TRMT112	-7.5	12	-1.7	0.0444	817	0.973	0.956	17112	1
TPH1	-7.5	12	-1.7	0.0444	818	0.973	0.956	17111	1
MFAP4	-7.5	12	-1.7	0.0444	819	0.973	0.956	17110	1
ANKS4B	-7.5	12	-1.7	0.0445	820	0.973	0.955	17109	1
C11orf48	-7.49	12	-1.7	0.0445	821	0.973	0.955	17108	1
TLK2	-6.49	9	-1.7	0.0446	822	0.973	0.955	17107	1
CAT	-7.49	12	-1.7	0.0447	823	0.973	0.955	17106	1
NRAP	-7.48	12	-1.7	0.0448	824	0.973	0.955	17105	1
OTOF	-7.48	12	-1.7	0.0448	825	0.973	0.955	17104	1
PRPF39	-7.48	12	-1.7	0.0448	826	0.973	0.955	17103	1
2021-09-07	-3.74	3	-1.7	0.045	827	0.975	0.955	17102	1
MYLK4	-7.47	12	-1.7	0.045	828	0.975	0.955	17101	1
CYP3A4	-3.74	3	-1.69	0.0451	829	0.976	0.955	17100	1
RAB43	-7.47	12	-1.69	0.0452	830	0.977	0.955	17099	1
CDC5L	-6.46	9	-1.69	0.0453	831	0.977	0.955	17098	1
OR51E2	-7.46	12	-1.69	0.0455	832	0.98	0.955	17097	1
ADCY2	-7.45	12	-1.69	0.0455	833	0.98	0.954	17096	1
SPTLC2	-7.45	12	-1.69	0.0456	834	0.98	0.954	17095	1
GDF3	-7.45	12	-1.69	0.0457	835	0.98	0.954	17094	1
CALCR	-7.45	12	-1.69	0.0457	836	0.98	0.954	17093	1
NAPB	-7.44	12	-1.69	0.0459	837	0.98	0.954	17092	1
MMP19	-7.44	12	-1.69	0.0459	838	0.98	0.954	17091	1
SPNS1	-7.44	12	-1.69	0.046	839	0.98	0.954	17090	1
OSGEP	-6.44	9	-1.68	0.046	840	0.98	0.954	17089	1
ZDHHC18	-7.43	12	-1.68	0.0461	841	0.98	0.954	17088	1
BAG2	-7.43	12	-1.68	0.0461	842	0.98	0.954	17087	1
ZNF513	-7.43	12	-1.68	0.0461	843	0.98	0.954	17086	1
SEC14L5	-7.43	12	-1.68	0.0461	844	0.98	0.954	17085	1
CNPY3	-7.43	12	-1.68	0.0462	845	0.98	0.954	17084	1
APH1A	-7.42	12	-1.68	0.0464	846	0.983	0.954	17083	1
PRR18	-7.42	12	-1.68	0.0465	847	0.984	0.954	17082	1
YIPF5	-7.41	12	-1.68	0.0465	848	0.984	0.953	17081	1
MIEN1	-7.4	12	-1.68	0.0468	849	0.985	0.953	17080	1
FKBP1B	-7.4	12	-1.68	0.0469	850	0.985	0.953	17079	1
SYNCRIP	-7.39	12	-1.67	0.047	851	0.985	0.953	17078	1
GPATCH1	-7.39	12	-1.67	0.047	852	0.985	0.953	17077	1
LAMB1	-7.39	12	-1.67	0.0471	853	0.985	0.953	17076	1
C21orf59	-6.74	10	-1.67	0.0472	854	0.985	0.953	17075	1
AFAP1L2	-7.39	12	-1.67	0.0472	855	0.985	0.953	17074	1
FANCB	-7.39	12	-1.67	0.0472	856	0.985	0.953	17073	1
CRTC2	-7.39	12	-1.67	0.0472	857	0.985	0.953	17072	1
HSD17B7	-7.38	12	-1.67	0.0473	858	0.985	0.953	17071	1
INMT	-7.38	12	-1.67	0.0473	859	0.985	0.953	17070	1
APOB	-7.38	12	-1.67	0.0474	860	0.985	0.953	17069	1
NICN1	-7.38	12	-1.67	0.0475	861	0.985	0.953	17068	1
ITGA2	-7.38	12	-1.67	0.0475	862	0.985	0.953	17067	1
SIX2	-7.38	12	-1.67	0.0475	863	0.985	0.953	17066	1
P4HA3	-7.38	12	-1.67	0.0475	864	0.985	0.953	17065	1
STAT2	-7.06	11	-1.67	0.0475	865	0.985	0.952	17064	1
GGPS1	-7.37	12	-1.67	0.0476	866	0.985	0.952	17063	1
C12orf56	-7.37	12	-1.67	0.0477	867	0.986	0.952	17062	1
SPATA4	-7.36	12	-1.67	0.0479	868	0.986	0.952	17061	1
PRCP	-7.36	12	-1.67	0.0479	869	0.986	0.952	17060	1
FOXP2	-7.36	12	-1.66	0.048	870	0.986	0.952	17059	1
PEBP1	-7.36	12	-1.66	0.048	871	0.986	0.952	17058	1
CCDC27	-7.35	12	-1.66	0.0481	872	0.986	0.952	17057	1
KREMEN1	-7.35	12	-1.66	0.0481	873	0.986	0.952	17056	1
TINF2	-7.35	12	-1.66	0.0481	874	0.986	0.952	17055	1
PROSC	-7.34	12	-1.66	0.0483	875	0.986	0.952	17054	1
TMC1	-7.34	12	-1.66	0.0484	876	0.986	0.952	17053	1
METTL25	-6.7	10	-1.66	0.0484	877	0.986	0.952	17052	1
ZSCAN32	-7.34	12	-1.66	0.0484	878	0.986	0.952	17051	1
NMI	-7.34	12	-1.66	0.0485	879	0.986	0.952	17050	1
SLITRK4	-7.34	12	-1.66	0.0485	880	0.986	0.952	17049	1
SPSB3	-7.34	12	-1.66	0.0485	881	0.986	0.952	17048	1
RBM11	-7.34	12	-1.66	0.0485	882	0.986	0.951	17047	1
PPP2R4	-7.33	12	-1.66	0.0488	883	0.99	0.951	17046	1
CNGA3	-7.33	12	-1.66	0.0488	884	0.99	0.951	17045	1
SLC23A3	-7.32	12	-1.65	0.049	885	0.991	0.951	17044	1
PACRG	-7.32	12	-1.65	0.049	886	0.991	0.951	17043	1
INSM2	-7.32	12	-1.65	0.0491	887	0.991	0.951	17042	1
PGM2L1	-7.31	12	-1.65	0.0493	888	0.991	0.951	17041	1
BTBD2	-7.31	12	-1.65	0.0493	889	0.991	0.951	17040	1
JMJD8	-7.31	12	-1.65	0.0494	890	0.991	0.951	17039	1
PRLR	-7.3	12	-1.65	0.0494	891	0.991	0.951	17038	1
MUT	-7.3	12	-1.65	0.0494	892	0.991	0.951	17037	1
RAB13	-7.3	12	-1.65	0.0495	893	0.991	0.951	17036	1
KIAA1045	-7.3	12	-1.65	0.0496	894	0.991	0.95	17035	1
ITIH5	-7.3	12	-1.65	0.0496	895	0.991	0.95	17034	1
TMEM179	-7.29	12	-1.65	0.0497	896	0.991	0.95	17033	1
ID1	-7.29	12	-1.65	0.0498	897	0.991	0.95	17032	1
TDO2	-7.29	12	-1.65	0.0499	898	0.991	0.95	17031	1
ASPHD2	-7.28	12	-1.65	0.0499	899	0.991	0.95	17030	1
C1orf131	-7.28	12	-1.65	0.05	900	0.991	0.95	17029	1
TPPP2	-7.28	12	-1.65	0.05	901	0.991	0.95	17028	1
PSMB3	-6.97	11	-1.64	0.0502	902	0.991	0.95	17027	1
MYL3	-7.27	12	-1.64	0.0502	903	0.991	0.95	17026	1
CDK12	-7.27	12	-1.64	0.0502	904	0.991	0.95	17025	1
BPGM	-7.27	12	-1.64	0.0502	905	0.991	0.95	17024	1
ZNF691	-7.27	12	-1.64	0.0503	906	0.991	0.95	17023	1
USP4	-7.27	12	-1.64	0.0504	907	0.991	0.95	17022	1
GPR151	-7.27	12	-1.64	0.0504	908	0.991	0.95	17021	1
CNR1	-7.26	12	-1.64	0.0505	909	0.991	0.95	17020	1
MAP1LC3A	-7.26	12	-1.64	0.0505	910	0.991	0.949	17019	1
PAEP	-7.26	12	-1.64	0.0506	911	0.991	0.949	17018	1
TOE1	-7.26	12	-1.64	0.0507	912	0.991	0.949	17017	1
TWIST1	-7.25	12	-1.64	0.0508	913	0.991	0.949	17016	1
OTX2	-6.62	10	-1.64	0.0508	914	0.991	0.949	17015	1
CCNA2	-7.24	12	-1.63	0.051	915	0.991	0.949	17014	1
CLCA1	-7.24	12	-1.63	0.0512	916	0.991	0.949	17013	1
DDO	-7.24	12	-1.63	0.0512	917	0.991	0.949	17012	1
UBE2J2	-7.23	12	-1.63	0.0513	918	0.991	0.949	17011	1
ZEB2	-7.23	12	-1.63	0.0513	919	0.991	0.949	17010	1
BRINP1	-7.23	12	-1.63	0.0513	920	0.991	0.949	17009	1
GLI2	-7.23	12	-1.63	0.0513	921	0.991	0.949	17008	1
SEMA3D	-6.92	11	-1.63	0.0513	922	0.991	0.949	17007	1
DCTD	-7.23	12	-1.63	0.0514	923	0.991	0.949	17006	1
CEP76	-7.22	12	-1.63	0.0516	924	0.991	0.948	17005	1
POM121L12	-7.22	12	-1.63	0.0517	925	0.991	0.948	17004	1
OR51F2	-7.22	12	-1.63	0.0517	926	0.991	0.948	17003	1
PYDC1	-7.22	12	-1.63	0.0517	927	0.991	0.948	17002	1
GAK	-7.22	12	-1.63	0.0518	928	0.991	0.948	17001	1
NAP1L4	-7.21	12	-1.63	0.0519	929	0.991	0.948	17000	1
TAB1	-6.58	10	-1.63	0.0519	930	0.991	0.948	16999	1
PDYN	-6.24	9	-1.63	0.0519	931	0.991	0.948	16998	1
ZNF512	-7.2	12	-1.62	0.0521	932	0.991	0.948	16997	1
KIAA0907	-7.2	12	-1.62	0.0523	933	0.991	0.948	16996	1
GSTT1	-7.19	12	-1.62	0.0525	934	0.991	0.947	16995	0.999
RTP3	-7.18	12	-1.62	0.0527	935	0.991	0.947	16994	0.999
TAOK1	-7.18	12	-1.62	0.0527	936	0.991	0.947	16993	0.999
FIGF	-7.18	12	-1.62	0.0527	937	0.991	0.947	16992	0.999
C5orf24	-7.18	12	-1.62	0.0528	938	0.991	0.947	16991	0.999
TUT1	-7.18	12	-1.62	0.0529	939	0.991	0.947	16990	0.999
TSC1	-7.17	12	-1.62	0.053	940	0.991	0.947	16989	0.999
LGSN	-7.17	12	-1.62	0.053	941	0.991	0.947	16988	0.999
SMARCAL1	-7.17	12	-1.62	0.0531	942	0.991	0.947	16987	0.999
HBQ1	-7.17	12	-1.62	0.0531	943	0.991	0.947	16986	0.999
MYRF	-7.17	12	-1.61	0.0532	944	0.991	0.947	16985	0.999
EPCAM	-7.17	12	-1.61	0.0532	945	0.991	0.947	16984	0.999
ADAD2	-7.17	12	-1.61	0.0532	946	0.991	0.947	16983	0.999
POP4	-7.16	12	-1.61	0.0532	947	0.991	0.947	16982	0.999
PPM1D	-7.16	12	-1.61	0.0534	948	0.991	0.947	16981	0.999
RPUSD1	-7.16	12	-1.61	0.0534	949	0.991	0.947	16980	0.999
AMMECR1L	-7.16	12	-1.61	0.0534	950	0.991	0.947	16979	0.999
MVP	-7.15	12	-1.61	0.0535	951	0.991	0.947	16978	0.999
ANKRA2	-7.15	12	-1.61	0.0535	952	0.991	0.946	16977	0.999
MMP8	-7.15	12	-1.61	0.0536	953	0.991	0.946	16976	0.999
SCNN1G	-7.15	12	-1.61	0.0536	954	0.991	0.946	16975	0.999
HNRNPAB	-7.15	12	-1.61	0.0536	955	0.991	0.946	16974	0.999
DNTT	-7.15	12	-1.61	0.0537	956	0.991	0.946	16973	0.999
AOC1	-7.14	12	-1.61	0.0538	957	0.991	0.946	16972	0.999
FSCN3	-7.14	12	-1.61	0.0538	958	0.991	0.946	16971	0.999
DYNLL1	-3.57	3	-1.61	0.0539	959	0.991	0.946	16970	0.999
ZDHHC7	-7.14	12	-1.61	0.054	960	0.991	0.946	16969	0.999
SCN2B	-7.14	12	-1.61	0.054	961	0.991	0.946	16968	0.999
UBR5	-7.13	12	-1.61	0.0541	962	0.991	0.946	16967	0.999
NRARP	-7.13	12	-1.61	0.0542	963	0.991	0.946	16966	0.999
TULP1	-7.13	12	-1.61	0.0542	964	0.991	0.946	16965	0.999
RAP2A	-7.13	12	-1.61	0.0542	965	0.991	0.946	16964	0.999
TNFRSF18	-7.13	12	-1.61	0.0542	966	0.991	0.946	16963	0.999
LIMK1	-7.13	12	-1.61	0.0542	967	0.991	0.946	16962	0.999
WFDC1	-7.13	12	-1.6	0.0543	968	0.991	0.946	16961	0.999
BTNL9	-7.12	12	-1.6	0.0544	969	0.991	0.946	16960	0.999
ITM2B	-7.12	12	-1.6	0.0544	970	0.991	0.946	16959	0.999
CCDC71	-7.12	12	-1.6	0.0546	971	0.991	0.945	16958	0.999
SMR3B	-7.12	12	-1.6	0.0546	972	0.991	0.945	16957	0.999
TMEM27	-7.11	12	-1.6	0.0546	973	0.991	0.945	16956	0.999
MAN2A2	-7.11	12	-1.6	0.0546	974	0.991	0.945	16955	0.999
C16orf96	-7.11	12	-1.6	0.0547	975	0.991	0.945	16954	0.999
CYP27C1	-7.11	12	-1.6	0.0547	976	0.991	0.945	16953	0.999
C8orf82	-7.11	12	-1.6	0.0548	977	0.991	0.945	16952	0.999
TM4SF19	-7.11	12	-1.6	0.0549	978	0.991	0.945	16951	0.999
DROSHA	-7.1	12	-1.6	0.0549	979	0.991	0.945	16950	0.999
PTGES3	-5.02	6	-1.6	0.0549	980	0.991	0.945	16949	0.999
MAST1	-7.1	12	-1.6	0.0549	981	0.991	0.945	16948	0.999
DYX1C1	-7.1	12	-1.6	0.055	982	0.991	0.945	16947	0.999
PCED1A	-7.1	12	-1.6	0.055	983	0.991	0.945	16946	0.999
GNAZ	-7.1	12	-1.6	0.0551	984	0.991	0.945	16945	0.999
PROC	-7.09	12	-1.6	0.0552	985	0.991	0.945	16944	0.999
GALNT11	-7.09	12	-1.6	0.0553	986	0.991	0.945	16943	0.999
JMJD7	-7.09	12	-1.6	0.0553	987	0.991	0.945	16942	0.999
ITGAD	-7.09	12	-1.59	0.0554	988	0.991	0.945	16941	0.999
COL8A2	-7.09	12	-1.59	0.0554	989	0.991	0.945	16940	0.999
RETSAT	-7.09	12	-1.59	0.0555	990	0.991	0.945	16939	0.999
SOWAHC	-7.08	12	-1.59	0.0555	991	0.991	0.944	16938	0.999
NR0B1	-7.08	12	-1.59	0.0555	992	0.991	0.944	16937	0.999
COL11A1	-7.08	12	-1.59	0.0555	993	0.991	0.944	16936	0.999
KLHDC8B	-7.08	12	-1.59	0.0556	994	0.991	0.944	16935	0.999
LRRD1	-7.08	12	-1.59	0.0556	995	0.991	0.944	16934	0.999
CTR9	-7.08	12	-1.59	0.0556	996	0.991	0.944	16933	0.999
UBXN2B	-7.08	12	-1.59	0.0557	997	0.991	0.944	16932	0.999
CCNI2	-7.08	12	-1.59	0.0557	998	0.991	0.944	16931	0.999
NTAN1	-7.08	12	-1.59	0.0558	999	0.991	0.944	16930	0.999
OR2D3	-7.07	12	-1.59	0.0558	1000	0.991	0.944	16929	0.999
SLC38A7	-7.07	12	-1.59	0.0558	1001	0.991	0.944	16928	0.999
SOCS6	-7.07	12	-1.59	0.0559	1002	0.991	0.944	16927	0.999
CASP1	-7.07	12	-1.59	0.056	1003	0.991	0.944	16926	0.999
COA1	-6.12	9	-1.59	0.056	1004	0.991	0.944	16925	0.999
DDHD1	-7.07	12	-1.59	0.056	1005	0.991	0.944	16924	0.999
CDKN2AIP	-7.07	12	-1.59	0.0561	1006	0.991	0.944	16923	0.999
KLRB1	-7.07	12	-1.59	0.0561	1007	0.991	0.944	16922	0.999
CIAO1	-7.06	12	-1.59	0.0561	1008	0.991	0.944	16921	0.999
CDC14A	-7.06	12	-1.59	0.0562	1009	0.991	0.944	16920	0.999
CES2	-7.06	12	-1.59	0.0562	1010	0.991	0.944	16919	0.999
PAK6	-7.06	12	-1.59	0.0562	1011	0.991	0.944	16918	0.999
XPO6	-7.06	12	-1.59	0.0563	1012	0.991	0.944	16917	0.999
NXT2	-7.05	12	-1.59	0.0564	1013	0.991	0.944	16916	0.999
ZNF205	-7.05	12	-1.59	0.0565	1014	0.991	0.944	16915	0.999
M6PR	-7.05	12	-1.58	0.0566	1015	0.991	0.943	16914	0.999
CCDC125	-7.05	12	-1.58	0.0566	1016	0.991	0.943	16913	0.999
SLCO2B1	-7.05	12	-1.58	0.0566	1017	0.991	0.943	16912	0.999
GRIA1	-7.05	12	-1.58	0.0567	1018	0.991	0.943	16911	0.999
COMMD9	-7.04	12	-1.58	0.0569	1019	0.991	0.943	16910	0.999
PLEKHA5	-7.03	12	-1.58	0.057	1020	0.991	0.943	16909	0.999
SMIM4	-7.03	12	-1.58	0.057	1021	0.991	0.943	16908	0.999
BCL2L13	-7.03	12	-1.58	0.0571	1022	0.991	0.943	16907	0.999
CDC25B	-7.03	12	-1.58	0.0571	1023	0.991	0.943	16906	0.999
PSMA7	-5.74	8	-1.58	0.0571	1024	0.991	0.943	16905	0.999
GNG7	-7.02	12	-1.58	0.0573	1025	0.991	0.943	16904	0.999
DCDC2	-7.02	12	-1.58	0.0574	1026	0.991	0.943	16903	0.999
MTERF	-7.02	12	-1.58	0.0574	1027	0.991	0.943	16902	0.999
HIST1H2BM	-7.02	12	-1.58	0.0575	1028	0.991	0.943	16901	0.999
YY1	-7.01	12	-1.58	0.0576	1029	0.991	0.942	16900	0.999
CYTH1	-7.01	12	-1.58	0.0576	1030	0.991	0.942	16899	0.999
HARBI1	-7.01	12	-1.57	0.0578	1031	0.991	0.942	16898	0.999
C5orf55	-7.01	12	-1.57	0.0578	1032	0.991	0.942	16897	0.999
PMEPA1	-7	12	-1.57	0.058	1033	0.991	0.942	16896	0.999
SDK1	-7	12	-1.57	0.0581	1034	0.991	0.942	16895	0.999
FHAD1	-6.99	12	-1.57	0.0582	1035	0.991	0.942	16894	0.999
PANX1	-6.99	12	-1.57	0.0582	1036	0.991	0.942	16893	0.999
PCDHA4	-6.99	12	-1.57	0.0584	1037	0.991	0.942	16892	0.999
RFESD	-6.99	12	-1.57	0.0584	1038	0.991	0.942	16891	0.999
CD207	-6.99	12	-1.57	0.0584	1039	0.991	0.942	16890	0.999
C1orf110	-6.99	12	-1.57	0.0585	1040	0.991	0.942	16889	0.999
OR1J2	-6.98	12	-1.57	0.0585	1041	0.991	0.942	16888	0.999
ZNF600	-6.98	12	-1.57	0.0586	1042	0.991	0.941	16887	0.999
MB21D1	-6.98	12	-1.57	0.0587	1043	0.991	0.941	16886	0.999
CACNA2D1	-6.97	12	-1.56	0.0588	1044	0.991	0.941	16885	0.999
SUPT16H	-6.97	12	-1.56	0.0588	1045	0.991	0.941	16884	0.999
EDN1	-6.97	12	-1.56	0.0588	1046	0.991	0.941	16883	0.999
IL2RA	-6.97	12	-1.56	0.0589	1047	0.991	0.941	16882	0.999
SLC17A4	-6.97	12	-1.56	0.059	1048	0.991	0.941	16881	0.999
RALGAPB	-6.96	12	-1.56	0.0591	1049	0.991	0.941	16880	0.999
BAZ1B	-6.96	12	-1.56	0.0591	1050	0.991	0.941	16879	0.999
CMTR2	-6.96	12	-1.56	0.0591	1051	0.991	0.941	16878	0.999
PEX13	-6.96	12	-1.56	0.0592	1052	0.991	0.941	16877	0.999
RTKN	-6.96	12	-1.56	0.0592	1053	0.991	0.941	16876	0.999
LARP7	-6.96	12	-1.56	0.0592	1054	0.991	0.941	16875	0.999
ANKMY1	-6.95	12	-1.56	0.0594	1055	0.991	0.941	16874	0.999
SREK1	-6.95	12	-1.56	0.0595	1056	0.991	0.941	16873	0.999
PPP1R18	-6.94	12	-1.56	0.0597	1057	0.991	0.94	16872	0.999
EML6	-6.94	12	-1.56	0.0598	1058	0.991	0.94	16871	0.999
RPS6KL1	-6.94	12	-1.56	0.0599	1059	0.991	0.94	16870	0.999
ARID1B	-6.94	12	-1.56	0.0599	1060	0.991	0.94	16869	0.999
SMOX	-6.93	12	-1.55	0.06	1061	0.991	0.94	16868	0.999
FTMT	-6.93	12	-1.55	0.0601	1062	0.991	0.94	16867	0.999
FANCL	-6.93	12	-1.55	0.0602	1063	0.991	0.94	16866	0.999
TTLL1	-6.93	12	-1.55	0.0603	1064	0.991	0.94	16865	0.999
PKHD1L1	-6.93	12	-1.55	0.0603	1065	0.991	0.94	16864	0.999
INHBB	-6.92	12	-1.55	0.0603	1066	0.991	0.94	16863	0.999
TMEM79	-6.92	12	-1.55	0.0604	1067	0.991	0.94	16862	0.999
UBE2D4	-6.91	12	-1.55	0.0608	1068	0.991	0.939	16861	0.999
HFE	-6.91	12	-1.55	0.0609	1069	0.991	0.939	16860	0.999
UBN1	-6.9	12	-1.55	0.061	1070	0.991	0.939	16859	0.999
C1orf109	-6.9	12	-1.55	0.0611	1071	0.991	0.939	16858	0.999
TRIM17	-6.89	12	-1.54	0.0613	1072	0.991	0.939	16857	0.998
PRSS48	-6.89	12	-1.54	0.0613	1073	0.991	0.939	16856	0.998
NAGPA	-6.89	12	-1.54	0.0614	1074	0.991	0.939	16855	0.998
ST3GAL6	-6.89	12	-1.54	0.0614	1075	0.991	0.939	16854	0.998
DEFB123	-6.89	12	-1.54	0.0615	1076	0.991	0.938	16853	0.998
DET1	-6.89	12	-1.54	0.0615	1077	0.991	0.938	16852	0.998
PIK3CG	-6.88	12	-1.54	0.0616	1078	0.991	0.938	16851	0.998
SLC35F6	-6.88	12	-1.54	0.0616	1079	0.991	0.938	16850	0.998
SLC40A1	-6.88	12	-1.54	0.0616	1080	0.991	0.938	16849	0.998
TRIT1	-6.88	12	-1.54	0.0616	1081	0.991	0.938	16848	0.998
CENPP	-6.88	12	-1.54	0.0617	1082	0.991	0.938	16847	0.998
GGH	-6.88	12	-1.54	0.0617	1083	0.991	0.938	16846	0.998
PCDHA9	-6.88	12	-1.54	0.0618	1084	0.991	0.938	16845	0.998
DNAJC27	-6.88	12	-1.54	0.0618	1085	0.991	0.938	16844	0.998
KDM8	-6.88	12	-1.54	0.0618	1086	0.991	0.938	16843	0.998
CCL26	-6.87	12	-1.54	0.0619	1087	0.991	0.938	16842	0.998
CDH18	-6.87	12	-1.54	0.062	1088	0.991	0.938	16841	0.998
GCFC2	-6.87	12	-1.54	0.0622	1089	0.991	0.938	16840	0.998
NUP37	-5.94	9	-1.54	0.0623	1090	0.991	0.938	16839	0.998
GNAO1	-6.86	12	-1.54	0.0623	1091	0.991	0.938	16838	0.998
DIS3L2	-6.86	12	-1.54	0.0623	1092	0.991	0.938	16837	0.998
FAM65C	-6.86	12	-1.53	0.0624	1093	0.991	0.938	16836	0.998
NPAS2	-6.86	12	-1.53	0.0625	1094	0.991	0.938	16835	0.998
PTPN3	-6.85	12	-1.53	0.0626	1095	0.991	0.937	16834	0.998
CAPS2	-6.85	12	-1.53	0.0626	1096	0.991	0.937	16833	0.998
SETDB1	-6.85	12	-1.53	0.0627	1097	0.991	0.937	16832	0.998
UBA3	-6.85	12	-1.53	0.0628	1098	0.991	0.937	16831	0.998
PAM	-6.85	12	-1.53	0.0628	1099	0.991	0.937	16830	0.998
FIBIN	-6.85	12	-1.53	0.0628	1100	0.991	0.937	16829	0.998
UBE2C	-6.85	12	-1.53	0.0628	1101	0.991	0.937	16828	0.998
SCNN1D	-6.84	12	-1.53	0.0629	1102	0.991	0.937	16827	0.998
PLD4	-6.84	12	-1.53	0.0629	1103	0.991	0.937	16826	0.998
MCM9	-6.84	12	-1.53	0.063	1104	0.991	0.937	16825	0.998
RASGRP1	-6.83	12	-1.53	0.0632	1105	0.991	0.937	16824	0.998
PSMG3	-6.83	12	-1.53	0.0632	1106	0.991	0.937	16823	0.998
RFC2	-6.54	11	-1.53	0.0633	1107	0.991	0.937	16822	0.998
KIAA1586	-5.92	9	-1.53	0.0633	1108	0.991	0.937	16821	0.998
STK11	-6.83	12	-1.53	0.0633	1109	0.991	0.937	16820	0.998
PTK2B	-6.83	12	-1.53	0.0634	1110	0.991	0.937	16819	0.998
CBLL1	-6.83	12	-1.53	0.0634	1111	0.991	0.937	16818	0.998
ADAM15	-6.83	12	-1.53	0.0635	1112	0.991	0.937	16817	0.998
ITPRIPL1	-6.83	12	-1.53	0.0635	1113	0.991	0.937	16816	0.998
TRIM72	-6.83	12	-1.53	0.0635	1114	0.991	0.937	16815	0.998
GPANK1	-6.82	12	-1.53	0.0636	1115	0.991	0.936	16814	0.998
SYT9	-6.82	12	-1.52	0.0636	1116	0.991	0.936	16813	0.998
PCBP4	-6.82	12	-1.52	0.0637	1117	0.991	0.936	16812	0.998
PWWP2B	-6.82	12	-1.52	0.0637	1118	0.991	0.936	16811	0.998
RBM39	-6.82	12	-1.52	0.0638	1119	0.991	0.936	16810	0.998
TXLNA	-6.81	12	-1.52	0.0638	1120	0.991	0.936	16809	0.998
LZTR1	-6.81	12	-1.52	0.064	1121	0.991	0.936	16808	0.998
DHX37	-6.81	12	-1.52	0.0641	1122	0.991	0.936	16807	0.998
MYF5	-6.8	12	-1.52	0.0641	1123	0.991	0.936	16806	0.998
SLC36A4	-6.8	12	-1.52	0.0642	1124	0.991	0.936	16805	0.998
LY96	-4.81	6	-1.52	0.0642	1125	0.991	0.936	16804	0.998
SLAIN1	-6.8	12	-1.52	0.0642	1126	0.991	0.936	16803	0.998
LEFTY1	-5.89	9	-1.52	0.0643	1127	0.991	0.936	16802	0.998
RMDN2	-6.8	12	-1.52	0.0645	1128	0.991	0.936	16801	0.998
BMP7	-6.79	12	-1.52	0.0646	1129	0.991	0.935	16800	0.998
PSMC5	-5.88	9	-1.52	0.0646	1130	0.991	0.935	16799	0.998
CCHCR1	-6.79	12	-1.52	0.0647	1131	0.991	0.935	16798	0.998
PRKD1	-6.79	12	-1.52	0.0647	1132	0.991	0.935	16797	0.998
MOSPD3	-6.79	12	-1.52	0.0647	1133	0.991	0.935	16796	0.998
CTNNBL1	-6.79	12	-1.52	0.0648	1134	0.991	0.935	16795	0.998
MRGPRD	-6.79	12	-1.52	0.0648	1135	0.991	0.935	16794	0.998
FCHSD1	-6.78	12	-1.52	0.0648	1136	0.991	0.935	16793	0.998
LIG4	-6.78	12	-1.52	0.0649	1137	0.991	0.935	16792	0.998
GM2A	-6.78	12	-1.51	0.0649	1138	0.991	0.935	16791	0.998
VPS16	-6.78	12	-1.51	0.065	1139	0.991	0.935	16790	0.998
DRD5	-6.78	12	-1.51	0.065	1140	0.991	0.935	16789	0.998
XIRP1	-6.78	12	-1.51	0.065	1141	0.991	0.935	16788	0.998
UBE2F	-6.78	12	-1.51	0.065	1142	0.991	0.935	16787	0.998
RHEBL1	-6.77	12	-1.51	0.0651	1143	0.991	0.935	16786	0.998
WFDC9	-6.77	12	-1.51	0.0651	1144	0.991	0.935	16785	0.998
PPP2R3C	-6.77	12	-1.51	0.0652	1145	0.991	0.935	16784	0.998
MBD3	-6.77	12	-1.51	0.0652	1146	0.991	0.935	16783	0.998
SULT1A1	-4.79	6	-1.51	0.0653	1147	0.991	0.935	16782	0.998
HOXA5	-6.77	12	-1.51	0.0654	1148	0.991	0.935	16781	0.998
C3orf33	-4.78	6	-1.51	0.0655	1149	0.991	0.935	16780	0.998
INSC	-6.76	12	-1.51	0.0656	1150	0.991	0.934	16779	0.998
TSLP	-6.76	12	-1.51	0.0656	1151	0.991	0.934	16778	0.998
AIMP2	-6.76	12	-1.51	0.0657	1152	0.991	0.934	16777	0.998
ERGIC1	-6.76	12	-1.51	0.0658	1153	0.991	0.934	16776	0.998
XRN2	-6.75	12	-1.51	0.0658	1154	0.991	0.934	16775	0.998
GMCL1	-6.75	12	-1.51	0.0658	1155	0.991	0.934	16774	0.998
HSD3B2	-6.75	12	-1.51	0.0658	1156	0.991	0.934	16773	0.998
ZNF441	-6.75	12	-1.51	0.0659	1157	0.991	0.934	16772	0.998
SUPT20H	-6.75	12	-1.51	0.0659	1158	0.991	0.934	16771	0.998
PDLIM2	-6.75	12	-1.51	0.066	1159	0.991	0.934	16770	0.998
MGAT1	-6.75	12	-1.51	0.066	1160	0.991	0.934	16769	0.998
PPP1R13B	-6.75	12	-1.51	0.066	1161	0.991	0.934	16768	0.998
MAP4K2	-6.75	12	-1.51	0.066	1162	0.991	0.934	16767	0.998
CDKN1C	-6.75	12	-1.51	0.0661	1163	0.991	0.934	16766	0.998
ARHGEF40	-6.74	12	-1.5	0.0662	1164	0.991	0.934	16765	0.998
ABHD17B	-6.74	12	-1.5	0.0663	1165	0.991	0.934	16764	0.998
OTUD6A	-6.74	12	-1.5	0.0664	1166	0.991	0.934	16763	0.998
CXCR5	-6.73	12	-1.5	0.0665	1167	0.991	0.933	16762	0.998
ATG9A	-6.73	12	-1.5	0.0665	1168	0.991	0.933	16761	0.998
SLC12A4	-6.73	12	-1.5	0.0667	1169	0.991	0.933	16760	0.998
RUNDC3B	-6.73	12	-1.5	0.0667	1170	0.991	0.933	16759	0.998
C1QB	-6.72	12	-1.5	0.067	1171	0.991	0.933	16758	0.998
ARL6IP1	-6.72	12	-1.5	0.0671	1172	0.991	0.933	16757	0.998
ZWILCH	-6.71	12	-1.5	0.0671	1173	0.991	0.933	16756	0.998
ALAS2	-6.71	12	-1.5	0.0673	1174	0.991	0.933	16755	0.998
GPATCH3	-6.71	12	-1.5	0.0673	1175	0.991	0.933	16754	0.998
C8orf56	-6.71	12	-1.5	0.0673	1176	0.991	0.933	16753	0.998
PEX7	-6.71	12	-1.5	0.0674	1177	0.991	0.933	16752	0.998
DHRS7	-6.71	12	-1.5	0.0675	1178	0.991	0.933	16751	0.998
KCNK7	-6.71	12	-1.5	0.0675	1179	0.991	0.933	16750	0.998
POLR2F	-6.7	12	-1.49	0.0675	1180	0.991	0.933	16749	0.998
KAT5	-6.7	12	-1.49	0.0675	1181	0.991	0.932	16748	0.998
MROH2B	-6.7	12	-1.49	0.0675	1182	0.991	0.932	16747	0.998
TMEM105	-6.7	12	-1.49	0.0675	1183	0.991	0.932	16746	0.998
CYP20A1	-6.7	12	-1.49	0.0677	1184	0.991	0.932	16745	0.998
PPP1R3G	-6.7	12	-1.49	0.0678	1185	0.991	0.932	16744	0.998
G0S2	-6.69	12	-1.49	0.0679	1186	0.991	0.932	16743	0.998
KCNJ14	-6.69	12	-1.49	0.068	1187	0.991	0.932	16742	0.998
CLEC2D	-6.69	12	-1.49	0.068	1188	0.991	0.932	16741	0.998
ZMAT4	-6.69	12	-1.49	0.068	1189	0.991	0.932	16740	0.998
C8orf49	-6.69	12	-1.49	0.068	1190	0.991	0.932	16739	0.998
ELN	-6.69	12	-1.49	0.068	1191	0.991	0.932	16738	0.998
GNRH1	-6.69	12	-1.49	0.068	1192	0.991	0.932	16737	0.998
NOTO	-6.68	12	-1.49	0.0682	1193	0.991	0.932	16736	0.998
TMEM147	-6.68	12	-1.49	0.0684	1194	0.991	0.932	16735	0.998
C19orf66	-6.68	12	-1.49	0.0684	1195	0.991	0.932	16734	0.998
KIF20A	-6.68	12	-1.49	0.0684	1196	0.991	0.932	16733	0.998
PPP1R12A	-6.67	12	-1.49	0.0685	1197	0.991	0.932	16732	0.998
ANKRD23	-6.67	12	-1.49	0.0685	1198	0.991	0.931	16731	0.998
ILF3	-6.67	12	-1.49	0.0685	1199	0.991	0.931	16730	0.998
ZNF667	-6.67	12	-1.49	0.0686	1200	0.991	0.931	16729	0.998
LYST	-6.67	12	-1.49	0.0686	1201	0.991	0.931	16728	0.998
GRIA3	-6.67	12	-1.49	0.0686	1202	0.991	0.931	16727	0.998
NUCKS1	-6.67	12	-1.49	0.0687	1203	0.991	0.931	16726	0.998
NAT1	-6.66	12	-1.48	0.0688	1204	0.991	0.931	16725	0.998
SORCS3	-6.66	12	-1.48	0.0691	1205	0.991	0.931	16724	0.998
ABHD13	-6.66	12	-1.48	0.0692	1206	0.991	0.931	16723	0.998
COL18A1	-6.65	12	-1.48	0.0692	1207	0.991	0.931	16722	0.998
LCK	-6.65	12	-1.48	0.0693	1208	0.991	0.931	16721	0.998
URB2	-6.65	12	-1.48	0.0694	1209	0.991	0.931	16720	0.998
BPIFB4	-6.65	12	-1.48	0.0695	1210	0.991	0.93	16719	0.998
REL	-6.64	12	-1.48	0.0695	1211	0.991	0.93	16718	0.998
RPS27A	-3.32	3	-1.48	0.0696	1212	0.991	0.93	16717	0.998
TEX264	-6.64	12	-1.48	0.0697	1213	0.991	0.93	16716	0.998
KDM3A	-6.64	12	-1.48	0.0697	1214	0.991	0.93	16715	0.998
MT1M	-3.32	3	-1.48	0.0697	1215	0.991	0.93	16714	0.998
UGT1A8	-6.64	12	-1.48	0.0697	1216	0.991	0.93	16713	0.998
C9orf129	-6.64	12	-1.48	0.0698	1217	0.991	0.93	16712	0.998
LAG3	-6.63	12	-1.48	0.0699	1218	0.991	0.93	16711	0.998
TRIM60	-6.63	12	-1.48	0.0699	1219	0.991	0.93	16710	0.998
NFE2L2	-6.63	12	-1.48	0.0701	1220	0.991	0.93	16709	0.998
NBEAL1	-6.63	12	-1.47	0.0702	1221	0.991	0.93	16708	0.998
FGR	-6.62	12	-1.47	0.0702	1222	0.991	0.93	16707	0.998
EIF4B	-6.62	12	-1.47	0.0702	1223	0.991	0.93	16706	0.998
ZNF596	-6.62	12	-1.47	0.0703	1224	0.991	0.93	16705	0.998
PCDHA5	-6.62	12	-1.47	0.0704	1225	0.991	0.93	16704	0.998
ITPKA	-6.62	12	-1.47	0.0705	1226	0.991	0.93	16703	0.998
IFI27	-6.62	12	-1.47	0.0705	1227	0.991	0.93	16702	0.998
FAM214A	-6.62	12	-1.47	0.0705	1228	0.991	0.929	16701	0.998
TPRKB	-6.61	12	-1.47	0.0706	1229	0.991	0.929	16700	0.998
KIAA1430	-6.61	12	-1.47	0.0707	1230	0.991	0.929	16699	0.998
PEA15	-6.61	12	-1.47	0.0707	1231	0.991	0.929	16698	0.998
LST1	-6.61	12	-1.47	0.0709	1232	0.991	0.929	16697	0.998
SERPINE1	-6.6	12	-1.47	0.071	1233	0.991	0.929	16696	0.998
GUCA1B	-6.6	12	-1.47	0.0712	1234	0.991	0.929	16695	0.997
RLIM	-6.6	12	-1.47	0.0712	1235	0.991	0.929	16694	0.997
IGFBP5	-6.59	12	-1.47	0.0714	1236	0.991	0.929	16693	0.997
TNF	-6.59	12	-1.47	0.0714	1237	0.991	0.929	16692	0.997
DIMT1	-6.59	12	-1.47	0.0714	1238	0.991	0.929	16691	0.997
BRICD5	-6.59	12	-1.46	0.0715	1239	0.991	0.929	16690	0.997
TSPAN15	-6.59	12	-1.46	0.0715	1240	0.991	0.929	16689	0.997
SMYD1	-6.59	12	-1.46	0.0715	1241	0.991	0.929	16688	0.997
NDC80	-6.59	12	-1.46	0.0715	1242	0.991	0.928	16687	0.997
DHX29	-6.59	12	-1.46	0.0716	1243	0.991	0.928	16686	0.997
C6orf25	-6.58	12	-1.46	0.0717	1244	0.991	0.928	16685	0.997
LPAR6	-6.58	12	-1.46	0.0717	1245	0.991	0.928	16684	0.997
TAMM41	-6.58	12	-1.46	0.0717	1246	0.991	0.928	16683	0.997
CREG1	-6.58	12	-1.46	0.0718	1247	0.991	0.928	16682	0.997
ZNF880	-6.58	12	-1.46	0.0718	1248	0.991	0.928	16681	0.997
CLEC3A	-6.58	12	-1.46	0.0719	1249	0.991	0.928	16680	0.997
ADRB3	-6.58	12	-1.46	0.0719	1250	0.991	0.928	16679	0.997
ZNF446	-6.57	12	-1.46	0.0722	1251	0.991	0.928	16678	0.997
MYH8	-5.69	9	-1.46	0.0722	1252	0.991	0.928	16677	0.997
CYP1A2	-6.57	12	-1.46	0.0722	1253	0.991	0.928	16676	0.997
WDHD1	-6.57	12	-1.46	0.0723	1254	0.991	0.928	16675	0.997
APMAP	-6.56	12	-1.46	0.0724	1255	0.991	0.928	16674	0.997
FYB	-6.56	12	-1.46	0.0725	1256	0.991	0.928	16673	0.997
MEPCE	-6.56	12	-1.46	0.0725	1257	0.991	0.928	16672	0.997
ZNF740	-6.56	12	-1.46	0.0725	1258	0.991	0.927	16671	0.997
GIT2	-6.56	12	-1.46	0.0726	1259	0.991	0.927	16670	0.997
CHRM2	-6.56	12	-1.46	0.0726	1260	0.991	0.927	16669	0.997
HES5	-6.56	12	-1.46	0.0726	1261	0.991	0.927	16668	0.997
FIBP	-6.56	12	-1.46	0.0727	1262	0.991	0.927	16667	0.997
HELQ	-6.56	12	-1.46	0.0727	1263	0.991	0.927	16666	0.997
GNAI1	-6.56	12	-1.46	0.0727	1264	0.991	0.927	16665	0.997
PTPRN	-6.55	12	-1.46	0.0727	1265	0.991	0.927	16664	0.997
PRSS56	-6.55	12	-1.46	0.0727	1266	0.991	0.927	16663	0.997
HORMAD2	-6.55	12	-1.46	0.0728	1267	0.991	0.927	16662	0.997
ZNF502	-6.55	12	-1.45	0.073	1268	0.991	0.927	16661	0.997
C2CD4C	-6.55	12	-1.45	0.073	1269	0.991	0.927	16660	0.997
E4F1	-6.55	12	-1.45	0.073	1270	0.991	0.927	16659	0.997
S100B	-6.54	12	-1.45	0.0731	1271	0.991	0.927	16658	0.997
KCTD4	-6.54	12	-1.45	0.0732	1272	0.991	0.927	16657	0.997
ATXN3L	-6.54	12	-1.45	0.0732	1273	0.991	0.927	16656	0.997
RAB6C	-6.54	12	-1.45	0.0732	1274	0.991	0.927	16655	0.997
ALX3	-6.54	12	-1.45	0.0732	1275	0.991	0.927	16654	0.997
AUTS2	-6.54	12	-1.45	0.0733	1276	0.991	0.927	16653	0.997
HOXD10	-6.54	12	-1.45	0.0733	1277	0.991	0.927	16652	0.997
ESM1	-6.54	12	-1.45	0.0734	1278	0.991	0.927	16651	0.997
HS6ST3	-6.54	12	-1.45	0.0734	1279	0.991	0.927	16650	0.997
USP42	-6.53	12	-1.45	0.0734	1280	0.991	0.927	16649	0.997
MFRP	-6.53	12	-1.45	0.0735	1281	0.991	0.927	16648	0.997
ZNF500	-6.53	12	-1.45	0.0735	1282	0.991	0.926	16647	0.997
GCHFR	-6.53	12	-1.45	0.0736	1283	0.991	0.926	16646	0.997
THAP10	-6.53	12	-1.45	0.0736	1284	0.991	0.926	16645	0.997
DOCK2	-6.53	12	-1.45	0.0738	1285	0.991	0.926	16644	0.997
GNPDA1	-6.52	12	-1.45	0.0738	1286	0.991	0.926	16643	0.997
SNX20	-6.52	12	-1.45	0.0738	1287	0.991	0.926	16642	0.997
MEX3B	-6.52	12	-1.45	0.0739	1288	0.991	0.926	16641	0.997
BEX5	-6.52	12	-1.45	0.0739	1289	0.991	0.926	16640	0.997
HPS1	-6.52	12	-1.45	0.0739	1290	0.991	0.926	16639	0.997
PRMT7	-6.52	12	-1.45	0.074	1291	0.991	0.926	16638	0.997
LACRT	-6.52	12	-1.45	0.074	1292	0.991	0.926	16637	0.997
KRT15	-6.52	12	-1.45	0.074	1293	0.991	0.926	16636	0.997
HGSNAT	-6.52	12	-1.45	0.074	1294	0.991	0.926	16635	0.997
ZFPL1	-6.51	12	-1.45	0.0742	1295	0.991	0.926	16634	0.997
TMEM219	-6.51	12	-1.45	0.0742	1296	0.991	0.926	16633	0.997
FANCG	-6.51	12	-1.45	0.0742	1297	0.991	0.926	16632	0.997
GGA1	-6.51	12	-1.45	0.0742	1298	0.991	0.926	16631	0.997
ANGPTL2	-6.51	12	-1.44	0.0743	1299	0.991	0.926	16630	0.997
CDC20	-6.51	12	-1.44	0.0743	1300	0.991	0.926	16629	0.997
SF3B1	-5.94	10	-1.44	0.0744	1301	0.991	0.926	16628	0.997
OR52A5	-6.51	12	-1.44	0.0744	1302	0.991	0.926	16627	0.997
OR12D3	-6.51	12	-1.44	0.0744	1303	0.991	0.926	16626	0.997
PRKAR1A	-6.51	12	-1.44	0.0745	1304	0.991	0.926	16625	0.997
BACE2	-6.5	12	-1.44	0.0745	1305	0.991	0.925	16624	0.997
ARHGEF17	-6.5	12	-1.44	0.0746	1306	0.991	0.925	16623	0.997
IGLL1	-6.5	12	-1.44	0.0746	1307	0.991	0.925	16622	0.997
RAB40C	-6.5	12	-1.44	0.0746	1308	0.991	0.925	16621	0.997
SNAPC3	-6.5	12	-1.44	0.0746	1309	0.991	0.925	16620	0.997
C19orf73	-6.5	12	-1.44	0.0747	1310	0.991	0.925	16619	0.997
RNMTL1	-6.5	12	-1.44	0.0747	1311	0.991	0.925	16618	0.997
OR4D6	-6.5	12	-1.44	0.0748	1312	0.991	0.925	16617	0.997
C17orf82	-6.5	12	-1.44	0.0748	1313	0.991	0.925	16616	0.997
TDGF1	-6.5	12	-1.44	0.0748	1314	0.991	0.925	16615	0.997
ACADSB	-6.5	12	-1.44	0.0748	1315	0.991	0.925	16614	0.997
XBP1	-6.49	12	-1.44	0.0749	1316	0.991	0.925	16613	0.997
PSMC2	-6.49	12	-1.44	0.075	1317	0.991	0.925	16612	0.997
ZNF439	-5.62	9	-1.44	0.075	1318	0.991	0.925	16611	0.997
CEMP1	-6.49	12	-1.44	0.0751	1319	0.991	0.925	16610	0.997
MOCS2	-6.49	12	-1.44	0.0752	1320	0.991	0.925	16609	0.997
FAM111B	-6.49	12	-1.44	0.0752	1321	0.991	0.925	16608	0.997
RNF217	-6.48	12	-1.44	0.0753	1322	0.991	0.925	16607	0.997
GORASP1	-6.48	12	-1.44	0.0753	1323	0.991	0.925	16606	0.997
SUCLG1	-6.48	12	-1.44	0.0756	1324	0.991	0.924	16605	0.997
SSH3	-6.47	12	-1.43	0.0758	1325	0.991	0.924	16604	0.997
OR2A2	-6.47	12	-1.43	0.0759	1326	0.991	0.924	16603	0.997
ABCB1	-6.47	12	-1.43	0.0759	1327	0.991	0.924	16602	0.997
DDHD2	-6.46	12	-1.43	0.0761	1328	0.991	0.924	16601	0.997
DHX9	-6.46	12	-1.43	0.0761	1329	0.991	0.924	16600	0.997
MRPL42	-6.46	12	-1.43	0.0761	1330	0.991	0.924	16599	0.997
HMGN5	-5.59	9	-1.43	0.0762	1331	0.991	0.924	16598	0.997
COL6A3	-6.46	12	-1.43	0.0762	1332	0.991	0.924	16597	0.997
FAM188A	-6.46	12	-1.43	0.0763	1333	0.991	0.924	16596	0.997
MSRB1	-6.46	12	-1.43	0.0763	1334	0.991	0.924	16595	0.997
UNC93A	-6.46	12	-1.43	0.0763	1335	0.991	0.924	16594	0.997
TRIM4	-6.45	12	-1.43	0.0765	1336	0.991	0.924	16593	0.997
ALG6	-6.45	12	-1.43	0.0765	1337	0.991	0.923	16592	0.997
HAPLN1	-6.45	12	-1.43	0.0766	1338	0.991	0.923	16591	0.997
PIH1D1	-6.45	12	-1.43	0.0767	1339	0.991	0.923	16590	0.997
SEPHS2	-6.45	12	-1.43	0.0767	1340	0.991	0.923	16589	0.997
NOD2	-6.44	12	-1.43	0.0768	1341	0.991	0.923	16588	0.997
CLEC4D	-6.44	12	-1.43	0.0768	1342	0.991	0.923	16587	0.997
MYO5B	-6.44	12	-1.43	0.0768	1343	0.991	0.923	16586	0.997
MTNR1B	-6.44	12	-1.43	0.077	1344	0.991	0.923	16585	0.997
FGF21	-6.44	12	-1.43	0.077	1345	0.991	0.923	16584	0.997
LHFPL1	-6.44	12	-1.43	0.077	1346	0.991	0.923	16583	0.997
BRWD1	-6.44	12	-1.43	0.077	1347	0.991	0.923	16582	0.997
TPM3	-6.43	12	-1.42	0.0771	1348	0.991	0.923	16581	0.997
IGF2BP3	-6.43	12	-1.42	0.0772	1349	0.991	0.923	16580	0.997
AGPS	-6.43	12	-1.42	0.0772	1350	0.991	0.923	16579	0.997
HTR2C	-6.43	12	-1.42	0.0772	1351	0.991	0.923	16578	0.997
C1orf228	-6.43	12	-1.42	0.0773	1352	0.991	0.923	16577	0.997
TMED8	-6.43	12	-1.42	0.0773	1353	0.991	0.923	16576	0.997
OR2AT4	-6.43	12	-1.42	0.0774	1354	0.991	0.923	16575	0.997
CHCHD7	-6.43	12	-1.42	0.0774	1355	0.991	0.923	16574	0.997
SETD7	-6.43	12	-1.42	0.0775	1356	0.991	0.923	16573	0.997
SRRM3	-6.42	12	-1.42	0.0776	1357	0.991	0.922	16572	0.997
KCTD7	-6.42	12	-1.42	0.0777	1358	0.991	0.922	16571	0.997
ZCWPW1	-6.41	12	-1.42	0.0779	1359	0.991	0.922	16570	0.997
MS4A12	-6.41	12	-1.42	0.078	1360	0.991	0.922	16569	0.997
TOMM40	-6.41	12	-1.42	0.078	1361	0.991	0.922	16568	0.997
C5orf47	-6.41	12	-1.42	0.0781	1362	0.991	0.922	16567	0.997
HBZ	-6.4	12	-1.42	0.0783	1363	0.991	0.922	16566	0.997
HNRNPA0	-6.4	12	-1.42	0.0783	1364	0.991	0.922	16565	0.997
TIGD5	-6.4	12	-1.42	0.0784	1365	0.991	0.922	16564	0.997
OR5AC2	-6.4	12	-1.41	0.0785	1366	0.991	0.921	16563	0.997
ZNF843	-6.4	12	-1.41	0.0786	1367	0.991	0.921	16562	0.997
SLC24A1	-6.4	12	-1.41	0.0786	1368	0.991	0.921	16561	0.997
PRPF31	-6.39	12	-1.41	0.0786	1369	0.991	0.921	16560	0.997
CHCHD3	-6.39	12	-1.41	0.0787	1370	0.991	0.921	16559	0.997
YWHAG	-6.39	12	-1.41	0.0787	1371	0.991	0.921	16558	0.997
OR5L2	-5.83	10	-1.41	0.0788	1372	0.991	0.921	16557	0.997
KIAA0556	-6.39	12	-1.41	0.0788	1373	0.991	0.921	16556	0.997
ATXN10	-6.39	12	-1.41	0.0788	1374	0.991	0.921	16555	0.997
BIRC2	-6.39	12	-1.41	0.0789	1375	0.991	0.921	16554	0.997
HYPK	-6.39	12	-1.41	0.0789	1376	0.991	0.921	16553	0.997
DENND5A	-6.39	12	-1.41	0.0789	1377	0.991	0.921	16552	0.997
GPR85	-6.39	12	-1.41	0.0789	1378	0.991	0.921	16551	0.997
MCTP1	-6.39	12	-1.41	0.079	1379	0.991	0.921	16550	0.997
CCDC47	-6.11	11	-1.41	0.079	1380	0.991	0.921	16549	0.997
VIPR1	-6.38	12	-1.41	0.0791	1381	0.991	0.921	16548	0.997
EXO1	-6.38	12	-1.41	0.0791	1382	0.991	0.921	16547	0.997
DEFB126	-6.38	12	-1.41	0.0791	1383	0.991	0.921	16546	0.997
C1orf64	-6.38	12	-1.41	0.0792	1384	0.991	0.921	16545	0.997
TMEM176A	-6.38	12	-1.41	0.0792	1385	0.991	0.921	16544	0.997
TBC1D31	-6.38	12	-1.41	0.0792	1386	0.991	0.921	16543	0.997
MAMDC4	-6.38	12	-1.41	0.0792	1387	0.991	0.921	16542	0.997
ZFP41	-6.38	12	-1.41	0.0792	1388	0.991	0.921	16541	0.997
R3HDML	-6.38	12	-1.41	0.0792	1389	0.991	0.921	16540	0.997
ZKSCAN2	-6.38	12	-1.41	0.0793	1390	0.991	0.921	16539	0.997
GLTP	-6.38	12	-1.41	0.0793	1391	0.991	0.921	16538	0.997
PRPF4B	-6.37	12	-1.41	0.0794	1392	0.991	0.921	16537	0.997
OSBPL3	-6.37	12	-1.41	0.0797	1393	0.991	0.92	16536	0.997
RCOR1	-6.37	12	-1.41	0.0797	1394	0.991	0.92	16535	0.997
ACTBL2	-6.37	12	-1.41	0.0797	1395	0.991	0.92	16534	0.997
UQCRH	-6.37	12	-1.41	0.0797	1396	0.991	0.92	16533	0.997
DCAF4L2	-6.37	12	-1.41	0.0798	1397	0.991	0.92	16532	0.997
ABCA8	-6.36	12	-1.41	0.0799	1398	0.991	0.92	16531	0.997
CCR2	-6.36	12	-1.4	0.0801	1399	0.991	0.92	16530	0.997
CHMP7	-6.36	12	-1.4	0.0801	1400	0.991	0.92	16529	0.997
MBTPS1	-6.36	12	-1.4	0.0801	1401	0.991	0.92	16528	0.997
OPN1SW	-6.35	12	-1.4	0.0802	1402	0.991	0.92	16527	0.997
LY6G6C	-6.35	12	-1.4	0.0802	1403	0.991	0.92	16526	0.997
MCMBP	-6.35	12	-1.4	0.0804	1404	0.991	0.92	16525	0.997
CLCA4	-6.35	12	-1.4	0.0804	1405	0.991	0.92	16524	0.997
RPUSD2	-6.35	12	-1.4	0.0805	1406	0.991	0.92	16523	0.997
UTP15	-6.34	12	-1.4	0.0805	1407	0.991	0.919	16522	0.997
FAM76A	-6.34	12	-1.4	0.0807	1408	0.991	0.919	16521	0.997
IGFBP6	-6.34	12	-1.4	0.0807	1409	0.991	0.919	16520	0.997
KRT23	-6.34	12	-1.4	0.0808	1410	0.991	0.919	16519	0.997
RGPD2	-5.49	9	-1.4	0.0808	1411	0.991	0.919	16518	0.997
LBX2	-6.34	12	-1.4	0.0809	1412	0.991	0.919	16517	0.997
TIMM10B	-6.33	12	-1.4	0.0811	1413	0.991	0.919	16516	0.997
MX1	-6.33	12	-1.4	0.0812	1414	0.991	0.919	16515	0.997
RFX7	-6.33	12	-1.4	0.0812	1415	0.991	0.919	16514	0.997
FUNDC2	-6.32	12	-1.4	0.0813	1416	0.991	0.919	16513	0.997
SP8	-6.32	12	-1.4	0.0814	1417	0.991	0.919	16512	0.997
C2CD5	-6.32	12	-1.4	0.0814	1418	0.991	0.919	16511	0.997
DEK	-6.32	12	-1.4	0.0815	1419	0.991	0.919	16510	0.997
PDE6A	-6.32	12	-1.4	0.0815	1420	0.991	0.919	16509	0.997
SRBD1	-6.32	12	-1.39	0.0815	1421	0.991	0.918	16508	0.997
HGS	-6.32	12	-1.39	0.0815	1422	0.991	0.918	16507	0.997
SLC2A4RG	-6.32	12	-1.39	0.0816	1423	0.991	0.918	16506	0.997
APOO	-6.32	12	-1.39	0.0817	1424	0.991	0.918	16505	0.997
SLC2A12	-6.31	12	-1.39	0.0818	1425	0.991	0.918	16504	0.997
TTC5	-6.31	12	-1.39	0.0819	1426	0.991	0.918	16503	0.997
ZNF112	-6.31	12	-1.39	0.0819	1427	0.991	0.918	16502	0.997
ARFIP1	-6.31	12	-1.39	0.0821	1428	0.991	0.918	16501	0.997
UBE2N	-4.46	6	-1.39	0.0822	1429	0.991	0.918	16500	0.997
UEVLD	-6.3	12	-1.39	0.0822	1430	0.991	0.918	16499	0.997
ZNF587B	-5.46	9	-1.39	0.0823	1431	0.991	0.918	16498	0.997
NAIP	-6.3	12	-1.39	0.0823	1432	0.991	0.918	16497	0.997
SLC22A11	-6.3	12	-1.39	0.0824	1433	0.991	0.918	16496	0.997
SLIT3	-6.3	12	-1.39	0.0824	1434	0.991	0.918	16495	0.997
ZNF517	-6.3	12	-1.39	0.0824	1435	0.991	0.918	16494	0.997
TRMT2A	-6.3	12	-1.39	0.0824	1436	0.991	0.918	16493	0.997
ZNF80	-6.3	12	-1.39	0.0824	1437	0.991	0.918	16492	0.997
FAM98A	-6.3	12	-1.39	0.0825	1438	0.991	0.918	16491	0.997
EIF3D	-6.29	12	-1.39	0.0826	1439	0.991	0.917	16490	0.997
ESPNL	-6.29	12	-1.39	0.0826	1440	0.991	0.917	16489	0.997
VGF	-6.29	12	-1.39	0.0826	1441	0.991	0.917	16488	0.997
BTN3A1	-6.29	12	-1.39	0.0826	1442	0.991	0.917	16487	0.997
GPAT2	-6.29	12	-1.39	0.0828	1443	0.991	0.917	16486	0.997
TTPAL	-6.29	12	-1.39	0.0828	1444	0.991	0.917	16485	0.997
INPP5J	-6.28	12	-1.39	0.083	1445	0.991	0.917	16484	0.997
SNCB	-6.28	12	-1.39	0.083	1446	0.991	0.917	16483	0.997
IMPA1	-6.28	12	-1.39	0.083	1447	0.991	0.917	16482	0.997
PPP6R1	-6.28	12	-1.38	0.0831	1448	0.991	0.917	16481	0.997
RUNX1T1	-6.28	12	-1.38	0.0831	1449	0.991	0.917	16480	0.997
OR2T4	-6.28	12	-1.38	0.0831	1450	0.991	0.917	16479	0.997
CHTF18	-6.28	12	-1.38	0.0832	1451	0.991	0.917	16478	0.997
RCE1	-6.28	12	-1.38	0.0833	1452	0.991	0.917	16477	0.997
ZBTB11	-6.28	12	-1.38	0.0833	1453	0.991	0.917	16476	0.997
TMX1	-6.27	12	-1.38	0.0833	1454	0.991	0.917	16475	0.997
OR10P1	-6.27	12	-1.38	0.0834	1455	0.991	0.917	16474	0.997
SCRG1	-6.27	12	-1.38	0.0835	1456	0.991	0.917	16473	0.997
TGS1	-6.27	12	-1.38	0.0835	1457	0.991	0.916	16472	0.997
SLC3A2	-6.27	12	-1.38	0.0836	1458	0.991	0.916	16471	0.997
ZSCAN30	-6.27	12	-1.38	0.0837	1459	0.991	0.916	16470	0.997
NTRK1	-6.26	12	-1.38	0.0837	1460	0.991	0.916	16469	0.997
OR8H1	-5.42	9	-1.38	0.0838	1461	0.991	0.916	16468	0.997
TOMM6	-6.26	12	-1.38	0.0838	1462	0.991	0.916	16467	0.997
COL7A1	-6.26	12	-1.38	0.0838	1463	0.991	0.916	16466	0.997
ERRFI1	-6.26	12	-1.38	0.0839	1464	0.991	0.916	16465	0.997
KDELR2	-6.26	12	-1.38	0.0839	1465	0.991	0.916	16464	0.997
C7orf10	-6.26	12	-1.38	0.0839	1466	0.991	0.916	16463	0.997
DNAJA4	-6.26	12	-1.38	0.0839	1467	0.991	0.916	16462	0.997
GPHN	-6.26	12	-1.38	0.0839	1468	0.991	0.916	16461	0.997
UBL3	-6.26	12	-1.38	0.084	1469	0.991	0.916	16460	0.997
OR4N4	-6.26	12	-1.38	0.084	1470	0.991	0.916	16459	0.997
TPSD1	-6.25	12	-1.38	0.0841	1471	0.991	0.916	16458	0.997
CYP51A1	-6.25	12	-1.38	0.0842	1472	0.991	0.916	16457	0.997
PDHA1	-6.25	12	-1.38	0.0842	1473	0.991	0.916	16456	0.997
KLHL18	-6.25	12	-1.38	0.0842	1474	0.991	0.916	16455	0.997
HTATSF1	-6.25	12	-1.38	0.0843	1475	0.991	0.916	16454	0.997
RRAGC	-6.25	12	-1.38	0.0844	1476	0.991	0.916	16453	0.997
IMMT	-6.25	12	-1.38	0.0845	1477	0.991	0.916	16452	0.997
SH2B1	-6.25	12	-1.38	0.0845	1478	0.991	0.916	16451	0.997
FBXO5	-6.24	12	-1.38	0.0845	1479	0.991	0.915	16450	0.997
ANKH	-6.24	12	-1.38	0.0846	1480	0.991	0.915	16449	0.997
CCR6	-6.24	12	-1.37	0.0846	1481	0.991	0.915	16448	0.997
C6orf136	-6.24	12	-1.37	0.0846	1482	0.991	0.915	16447	0.997
CDC23	-6.24	12	-1.37	0.0848	1483	0.991	0.915	16446	0.997
NELFE	-6.23	12	-1.37	0.085	1484	0.991	0.915	16445	0.997
PCDHA12	-6.23	12	-1.37	0.085	1485	0.991	0.915	16444	0.997
PC	-6.23	12	-1.37	0.085	1486	0.991	0.915	16443	0.997
MANEA	-5.4	9	-1.37	0.0851	1487	0.991	0.915	16442	0.997
ARL2	-6.23	12	-1.37	0.0852	1488	0.991	0.915	16441	0.997
BOD1L2	-6.23	12	-1.37	0.0852	1489	0.991	0.915	16440	0.997
KIAA1429	-6.22	12	-1.37	0.0853	1490	0.991	0.915	16439	0.997
FMR1	-6.22	12	-1.37	0.0853	1491	0.991	0.915	16438	0.997
DDC	-6.22	12	-1.37	0.0855	1492	0.991	0.914	16437	0.997
MCPH1	-6.22	12	-1.37	0.0855	1493	0.991	0.914	16436	0.997
APOA4	-6.22	12	-1.37	0.0855	1494	0.991	0.914	16435	0.997
EIF4H	-6.21	12	-1.37	0.0857	1495	0.991	0.914	16434	0.997
ANXA9	-6.21	12	-1.37	0.0858	1496	0.991	0.914	16433	0.997
PEX19	-6.21	12	-1.37	0.0858	1497	0.991	0.914	16432	0.997
ZNF280C	-6.21	12	-1.37	0.0858	1498	0.991	0.914	16431	0.997
NR0B2	-6.21	12	-1.37	0.0858	1499	0.991	0.914	16430	0.997
SMPD4	-6.21	12	-1.37	0.0859	1500	0.991	0.914	16429	0.997
MPZL1	-6.21	12	-1.37	0.086	1501	0.991	0.914	16428	0.997
FTCDNL1	-6.21	12	-1.37	0.086	1502	0.991	0.914	16427	0.997
SLC1A6	-6.21	12	-1.37	0.0861	1503	0.991	0.914	16426	0.997
PAXIP1	-6.2	12	-1.36	0.0862	1504	0.991	0.914	16425	0.997
C9orf116	-6.2	12	-1.36	0.0862	1505	0.991	0.914	16424	0.997
FNDC9	-6.2	12	-1.36	0.0863	1506	0.991	0.914	16423	0.997
SCLY	-6.2	12	-1.36	0.0863	1507	0.991	0.914	16422	0.997
DDX49	-6.2	12	-1.36	0.0864	1508	0.991	0.914	16421	0.997
UTRN	-6.2	12	-1.36	0.0864	1509	0.991	0.914	16420	0.997
COG5	-6.2	12	-1.36	0.0864	1510	0.991	0.914	16419	0.997
AFAP1	-6.2	12	-1.36	0.0865	1511	0.991	0.914	16418	0.997
HSD17B2	-6.2	12	-1.36	0.0865	1512	0.991	0.914	16417	0.997
ZNF135	-6.19	12	-1.36	0.0865	1513	0.991	0.913	16416	0.997
KCNF1	-6.19	12	-1.36	0.0866	1514	0.991	0.913	16415	0.997
CREBRF	-6.19	12	-1.36	0.0866	1515	0.991	0.913	16414	0.997
KLHL13	-5.36	9	-1.36	0.0868	1516	0.991	0.913	16413	0.997
GCA	-6.19	12	-1.36	0.0868	1517	0.991	0.913	16412	0.997
LCTL	-6.18	12	-1.36	0.087	1518	0.991	0.913	16411	0.997
DHX15	-6.18	12	-1.36	0.087	1519	0.991	0.913	16410	0.997
PSMB2	-6.18	12	-1.36	0.0871	1520	0.991	0.913	16409	0.997
C1orf168	-6.18	12	-1.36	0.0873	1521	0.991	0.913	16408	0.997
SNX18	-6.18	12	-1.36	0.0873	1522	0.991	0.913	16407	0.997
ACTG2	-6.18	12	-1.36	0.0873	1523	0.991	0.913	16406	0.997
OR2C1	-6.17	12	-1.36	0.0874	1524	0.991	0.913	16405	0.997
CNRIP1	-6.17	12	-1.36	0.0874	1525	0.991	0.913	16404	0.997
C7orf60	-6.17	12	-1.36	0.0875	1526	0.991	0.913	16403	0.997
RARS2	-6.17	12	-1.36	0.0876	1527	0.991	0.912	16402	0.997
RNF41	-6.17	12	-1.36	0.0876	1528	0.991	0.912	16401	0.997
PRPS1	-6.17	12	-1.36	0.0877	1529	0.991	0.912	16400	0.997
RELA	-6.16	12	-1.35	0.0878	1530	0.991	0.912	16399	0.997
RIPK3	-6.16	12	-1.35	0.0878	1531	0.991	0.912	16398	0.997
MSH2	-6.16	12	-1.35	0.0878	1532	0.991	0.912	16397	0.997
GRB10	-6.16	12	-1.35	0.0879	1533	0.991	0.912	16396	0.997
PGGT1B	-6.16	12	-1.35	0.0879	1534	0.991	0.912	16395	0.997
KLF14	-6.16	12	-1.35	0.0879	1535	0.991	0.912	16394	0.997
HEATR5B	-6.16	12	-1.35	0.088	1536	0.991	0.912	16393	0.997
RASSF5	-6.16	12	-1.35	0.088	1537	0.991	0.912	16392	0.997
ZNF664	-6.16	12	-1.35	0.088	1538	0.991	0.912	16391	0.997
FAM160B1	-6.16	12	-1.35	0.0881	1539	0.991	0.912	16390	0.997
HAX1	-6.15	12	-1.35	0.0882	1540	0.991	0.912	16389	0.997
CDNF	-3.08	3	-1.35	0.0883	1541	0.991	0.912	16388	0.997
FBXO2	-6.15	12	-1.35	0.0883	1542	0.991	0.912	16387	0.997
GATA4	-6.15	12	-1.35	0.0884	1543	0.991	0.912	16386	0.997
BPIFA3	-6.15	12	-1.35	0.0884	1544	0.991	0.912	16385	0.997
NYAP1	-6.15	12	-1.35	0.0884	1545	0.991	0.912	16384	0.997
NODAL	-6.15	12	-1.35	0.0884	1546	0.991	0.912	16383	0.997
NAGK	-6.15	12	-1.35	0.0884	1547	0.991	0.912	16382	0.997
KLC2	-6.15	12	-1.35	0.0885	1548	0.991	0.912	16381	0.997
SNRNP40	-6.15	12	-1.35	0.0885	1549	0.991	0.911	16380	0.997
UBXN1	-6.14	12	-1.35	0.0886	1550	0.991	0.911	16379	0.997
PRKAG2	-6.14	12	-1.35	0.0887	1551	0.991	0.911	16378	0.997
C10orf118	-6.14	12	-1.35	0.0887	1552	0.991	0.911	16377	0.997
TMEM50A	-6.14	12	-1.35	0.0887	1553	0.991	0.911	16376	0.997
TOR1B	-6.14	12	-1.35	0.0889	1554	0.991	0.911	16375	0.997
PSD4	-6.14	12	-1.35	0.0889	1555	0.991	0.911	16374	0.997
BCAS3	-5.32	9	-1.35	0.0889	1556	0.991	0.911	16373	0.997
ODC1	-6.14	12	-1.35	0.0889	1557	0.991	0.911	16372	0.997
NPTX1	-6.14	12	-1.35	0.089	1558	0.991	0.911	16371	0.997
RAB6A	-3.07	3	-1.35	0.089	1559	0.991	0.911	16370	0.997
QTRT1	-6.13	12	-1.35	0.0891	1560	0.991	0.911	16369	0.997
ABCG5	-6.13	12	-1.35	0.0891	1561	0.991	0.911	16368	0.997
ZNF860	-4.34	6	-1.35	0.0891	1562	0.991	0.911	16367	0.997
DCAF12L1	-6.13	12	-1.35	0.0892	1563	0.991	0.911	16366	0.997
FBXO6	-6.13	12	-1.35	0.0892	1564	0.991	0.911	16365	0.997
KIAA1107	-6.12	12	-1.34	0.0896	1565	0.991	0.91	16364	0.997
AHSA1	-6.12	12	-1.34	0.0896	1566	0.991	0.91	16363	0.997
TMEM213	-6.12	12	-1.34	0.0897	1567	0.991	0.91	16362	0.997
C15orf48	-6.12	12	-1.34	0.0898	1568	0.991	0.91	16361	0.997
RAN	-4.67	7	-1.34	0.0898	1569	0.991	0.91	16360	0.997
SDC1	-6.11	12	-1.34	0.0899	1570	0.991	0.91	16359	0.997
MAPRE3	-6.11	12	-1.34	0.0899	1571	0.991	0.91	16358	0.997
FANCA	-6.11	12	-1.34	0.09	1572	0.991	0.91	16357	0.997
FADS2	-6.11	12	-1.34	0.09	1573	0.991	0.91	16356	0.997
EIF5	-6.11	12	-1.34	0.09	1574	0.991	0.91	16355	0.997
SPRED3	-6.11	12	-1.34	0.09	1575	0.991	0.91	16354	0.997
SIDT1	-6.11	12	-1.34	0.09	1576	0.991	0.91	16353	0.997
PGC	-6.11	12	-1.34	0.0901	1577	0.991	0.91	16352	0.997
CRLF3	-6.11	12	-1.34	0.0902	1578	0.991	0.91	16351	0.997
PDCL3	-6.1	12	-1.34	0.0905	1579	0.991	0.91	16350	0.997
TTC13	-6.1	12	-1.34	0.0906	1580	0.991	0.909	16349	0.997
SMYD5	-5.84	11	-1.34	0.0906	1581	0.991	0.909	16348	0.997
FOXN2	-6.1	12	-1.34	0.0907	1582	0.991	0.909	16347	0.997
NR2E1	-6.09	12	-1.34	0.0907	1583	0.991	0.909	16346	0.997
NR2F1	-6.09	12	-1.34	0.0907	1584	0.991	0.909	16345	0.997
ATG13	-6.09	12	-1.34	0.0908	1585	0.991	0.909	16344	0.997
OR5T1	-6.09	12	-1.34	0.0908	1586	0.991	0.909	16343	0.997
EDF1	-5.83	11	-1.34	0.0909	1587	0.991	0.909	16342	0.997
INHA	-6.09	12	-1.34	0.0909	1588	0.991	0.909	16341	0.997
SCXA	-6.08	12	-1.33	0.0911	1589	0.991	0.909	16340	0.997
CYP4F22	-6.08	12	-1.33	0.0911	1590	0.991	0.909	16339	0.997
ZNF609	-6.08	12	-1.33	0.0912	1591	0.991	0.909	16338	0.997
LRRC56	-6.08	12	-1.33	0.0912	1592	0.991	0.909	16337	0.997
GPT2	-6.08	12	-1.33	0.0913	1593	0.991	0.909	16336	0.997
RSPO4	-6.08	12	-1.33	0.0914	1594	0.991	0.909	16335	0.997
LMBRD2	-6.08	12	-1.33	0.0914	1595	0.991	0.909	16334	0.997
UBIAD1	-6.08	12	-1.33	0.0915	1596	0.991	0.909	16333	0.997
NPPA	-6.08	12	-1.33	0.0915	1597	0.991	0.909	16332	0.997
TTC31	-6.07	12	-1.33	0.0916	1598	0.991	0.908	16331	0.997
DEDD	-6.07	12	-1.33	0.0917	1599	0.991	0.908	16330	0.997
ANP32D	-3.04	3	-1.33	0.0917	1600	0.991	0.908	16329	0.997
ZNF793	-6.07	12	-1.33	0.0918	1601	0.991	0.908	16328	0.997
NAPG	-6.07	12	-1.33	0.0919	1602	0.991	0.908	16327	0.997
PABPN1	-6.07	12	-1.33	0.0919	1603	0.991	0.908	16326	0.997
ZDHHC4	-6.07	12	-1.33	0.092	1604	0.991	0.908	16325	0.997
RABEP1	-6.06	12	-1.33	0.0921	1605	0.991	0.908	16324	0.997
SOSTDC1	-6.06	12	-1.33	0.0922	1606	0.991	0.908	16323	0.997
SON	-6.06	12	-1.33	0.0923	1607	0.991	0.908	16322	0.997
ZNF438	-6.06	12	-1.33	0.0923	1608	0.991	0.908	16321	0.997
KIF4A	-6.06	12	-1.33	0.0924	1609	0.991	0.908	16320	0.997
CYTIP	-6.06	12	-1.33	0.0924	1610	0.991	0.908	16319	0.997
EMILIN1	-6.05	12	-1.33	0.0924	1611	0.991	0.908	16318	0.997
CYP4A11	-5.24	9	-1.33	0.0925	1612	0.991	0.908	16317	0.997
KCNA2	-6.05	12	-1.33	0.0925	1613	0.991	0.907	16316	0.997
FREM2	-6.05	12	-1.33	0.0925	1614	0.991	0.907	16315	0.997
FAM124A	-5.79	11	-1.32	0.0927	1615	0.991	0.907	16314	0.997
PURG	-6.05	12	-1.32	0.0928	1616	0.991	0.907	16313	0.997
NAV2	-6.05	12	-1.32	0.0928	1617	0.991	0.907	16312	0.997
EFTUD1	-6.04	12	-1.32	0.0928	1618	0.991	0.907	16311	0.997
ZNF629	-5.23	9	-1.32	0.0929	1619	0.991	0.907	16310	0.997
TEKT4	-6.04	12	-1.32	0.0929	1620	0.991	0.907	16309	0.997
ECM1	-6.04	12	-1.32	0.0929	1621	0.991	0.907	16308	0.997
MMP25	-6.04	12	-1.32	0.0929	1622	0.991	0.907	16307	0.997
HPS4	-6.04	12	-1.32	0.093	1623	0.991	0.907	16306	0.997
INADL	-6.04	12	-1.32	0.0931	1624	0.991	0.907	16305	0.997
PHF6	-6.04	12	-1.32	0.0932	1625	0.991	0.907	16304	0.997
SMIM18	-6.04	12	-1.32	0.0932	1626	0.991	0.907	16303	0.997
PSMG2	-6.04	12	-1.32	0.0933	1627	0.991	0.907	16302	0.997
NACC2	-6.03	12	-1.32	0.0933	1628	0.991	0.907	16301	0.997
SOCS5	-6.03	12	-1.32	0.0933	1629	0.991	0.907	16300	0.997
KCNK18	-6.03	12	-1.32	0.0934	1630	0.991	0.907	16299	0.997
DUXA	-6.03	12	-1.32	0.0934	1631	0.991	0.907	16298	0.997
SMG5	-6.03	12	-1.32	0.0936	1632	0.991	0.906	16297	0.997
TAOK3	-6.03	12	-1.32	0.0936	1633	0.991	0.906	16296	0.997
L3MBTL2	-6.02	12	-1.32	0.0938	1634	0.991	0.906	16295	0.997
TFRC	-6.02	12	-1.32	0.0939	1635	0.991	0.906	16294	0.997
ADAMTSL4	-6.02	12	-1.32	0.0939	1636	0.991	0.906	16293	0.997
MEIS1	-6.02	12	-1.32	0.0941	1637	0.991	0.906	16292	0.997
RP1L1	-6.02	12	-1.32	0.0941	1638	0.991	0.906	16291	0.997
ST3GAL1	-6.01	12	-1.32	0.0942	1639	0.991	0.906	16290	0.997
CCDC121	-6.01	12	-1.31	0.0943	1640	0.991	0.906	16289	0.997
SHFM1	-6.01	12	-1.31	0.0944	1641	0.991	0.906	16288	0.997
SRRM2	-6.01	12	-1.31	0.0944	1642	0.991	0.906	16287	0.997
OR52B4	-6.01	12	-1.31	0.0945	1643	0.991	0.905	16286	0.997
NKAIN4	-6.01	12	-1.31	0.0945	1644	0.991	0.905	16285	0.997
TTC9	-6.01	12	-1.31	0.0946	1645	0.991	0.905	16284	0.997
HIRIP3	-6	12	-1.31	0.0946	1646	0.991	0.905	16283	0.997
FAM193B	-6	12	-1.31	0.0946	1647	0.991	0.905	16282	0.997
RERE	-6	12	-1.31	0.0947	1648	0.991	0.905	16281	0.997
ZNF713	-6	12	-1.31	0.0948	1649	0.991	0.905	16280	0.997
ZNF256	-6	12	-1.31	0.0948	1650	0.991	0.905	16279	0.997
TMEM199	-6	12	-1.31	0.095	1651	0.991	0.905	16278	0.997
ZNF852	-6	12	-1.31	0.095	1652	0.991	0.905	16277	0.997
DDX24	-5.99	12	-1.31	0.0951	1653	0.991	0.905	16276	0.997
HRH2	-5.99	12	-1.31	0.0951	1654	0.991	0.905	16275	0.997
CD8B	-5.99	12	-1.31	0.0953	1655	0.991	0.905	16274	0.997
RHOQ	-5.99	12	-1.31	0.0953	1656	0.991	0.905	16273	0.997
PPP1R3E	-5.98	12	-1.31	0.0955	1657	0.991	0.905	16272	0.997
SYT14	-5.98	12	-1.31	0.0956	1658	0.991	0.904	16271	0.997
PDK1	-5.98	12	-1.31	0.0956	1659	0.991	0.904	16270	0.997
SNX16	-5.98	12	-1.31	0.0957	1660	0.991	0.904	16269	0.997
OR51H1P	-5.98	12	-1.31	0.0957	1661	0.991	0.904	16268	0.997
CRTAM	-5.97	12	-1.31	0.0959	1662	0.991	0.904	16267	0.996
EPAS1	-5.97	12	-1.31	0.0959	1663	0.991	0.904	16266	0.996
SH3GL1	-5.97	12	-1.31	0.0959	1664	0.991	0.904	16265	0.996
BPIFA2	-5.97	12	-1.3	0.096	1665	0.991	0.904	16264	0.996
EZR	-5.97	12	-1.3	0.096	1666	0.991	0.904	16263	0.996
ATG16L2	-5.97	12	-1.3	0.096	1667	0.991	0.904	16262	0.996
KCTD19	-5.97	12	-1.3	0.096	1668	0.991	0.904	16261	0.996
KEL	-5.97	12	-1.3	0.096	1669	0.991	0.904	16260	0.996
METTL21B	-5.97	12	-1.3	0.096	1670	0.991	0.904	16259	0.996
IFT122	-5.97	12	-1.3	0.096	1671	0.991	0.904	16258	0.996
SRRM5	-5.97	12	-1.3	0.0961	1672	0.991	0.904	16257	0.996
ERN2	-5.97	12	-1.3	0.0962	1673	0.991	0.904	16256	0.996
ANGPTL7	-5.97	12	-1.3	0.0962	1674	0.991	0.904	16255	0.996
ENO2	-5.97	12	-1.3	0.0963	1675	0.991	0.904	16254	0.996
SMARCC1	-5.97	12	-1.3	0.0963	1676	0.991	0.904	16253	0.996
RBFA	-5.96	12	-1.3	0.0965	1677	0.991	0.904	16252	0.996
CDKN1B	-5.96	12	-1.3	0.0965	1678	0.991	0.904	16251	0.996
CALM1	-5.96	12	-1.3	0.0965	1679	0.991	0.903	16250	0.996
CHKA	-5.96	12	-1.3	0.0966	1680	0.991	0.903	16249	0.996
ADCY9	-5.96	12	-1.3	0.0967	1681	0.991	0.903	16248	0.996
TNFAIP8L3	-5.95	12	-1.3	0.0968	1682	0.991	0.903	16247	0.996
VRK3	-5.95	12	-1.3	0.0969	1683	0.991	0.903	16246	0.996
SDC3	-5.95	12	-1.3	0.0969	1684	0.991	0.903	16245	0.996
SDHAF2	-5.95	12	-1.3	0.0969	1685	0.991	0.903	16244	0.996
C6orf89	-5.95	12	-1.3	0.0969	1686	0.991	0.903	16243	0.996
CD82	-5.95	12	-1.3	0.097	1687	0.991	0.903	16242	0.996
HCRTR2	-5.95	12	-1.3	0.097	1688	0.991	0.903	16241	0.996
VWA7	-5.95	12	-1.3	0.0971	1689	0.991	0.903	16240	0.996
HSPA14	-5.95	12	-1.3	0.0971	1690	0.991	0.903	16239	0.996
TNIP3	-5.95	12	-1.3	0.0971	1691	0.991	0.903	16238	0.996
ALS2	-5.95	12	-1.3	0.0972	1692	0.991	0.903	16237	0.996
TYMP	-5.94	12	-1.3	0.0973	1693	0.991	0.903	16236	0.996
ZFYVE20	-5.94	12	-1.3	0.0973	1694	0.991	0.903	16235	0.996
STIP1	-5.94	12	-1.3	0.0975	1695	0.991	0.903	16234	0.996
FKBP1C	-5.14	9	-1.3	0.0975	1696	0.991	0.903	16233	0.996
SH3YL1	-5.94	12	-1.3	0.0975	1697	0.991	0.902	16232	0.996
C7orf25	-5.94	12	-1.3	0.0976	1698	0.991	0.902	16231	0.996
CRYGB	-5.94	12	-1.3	0.0976	1699	0.991	0.902	16230	0.996
SLC12A7	-5.94	12	-1.3	0.0976	1700	0.991	0.902	16229	0.996
GDPD4	-5.94	12	-1.3	0.0976	1701	0.991	0.902	16228	0.996
CPNE2	-5.94	12	-1.29	0.0977	1702	0.991	0.902	16227	0.996
PRSS23	-5.93	12	-1.29	0.0978	1703	0.991	0.902	16226	0.996
NMD3	-5.93	12	-1.29	0.0979	1704	0.991	0.902	16225	0.996
RPLP1	-4.19	6	-1.29	0.098	1705	0.991	0.902	16224	0.996
C4orf3	-5.92	12	-1.29	0.0982	1706	0.991	0.902	16223	0.996
UCHL3	-5.92	12	-1.29	0.0982	1707	0.991	0.902	16222	0.996
HES6	-5.92	12	-1.29	0.0982	1708	0.991	0.902	16221	0.996
DCTN6	-5.92	12	-1.29	0.0983	1709	0.991	0.902	16220	0.996
ASIC3	-5.92	12	-1.29	0.0985	1710	0.991	0.902	16219	0.996
NCALD	-5.92	12	-1.29	0.0985	1711	0.991	0.901	16218	0.996
C2CD3	-5.66	11	-1.29	0.0985	1712	0.991	0.901	16217	0.996
FAM228B	-5.92	12	-1.29	0.0986	1713	0.991	0.901	16216	0.996
KLHDC3	-5.92	12	-1.29	0.0986	1714	0.991	0.901	16215	0.996
NPBWR2	-5.91	12	-1.29	0.0987	1715	0.991	0.901	16214	0.996
PTRH1	-5.91	12	-1.29	0.0987	1716	0.991	0.901	16213	0.996
PAPSS1	-5.91	12	-1.29	0.0987	1717	0.991	0.901	16212	0.996
NMB	-5.91	12	-1.29	0.0987	1718	0.991	0.901	16211	0.996
DFFB	-5.91	12	-1.29	0.0988	1719	0.991	0.901	16210	0.996
ENKD1	-5.91	12	-1.29	0.0988	1720	0.991	0.901	16209	0.996
ANKRD32	-5.91	12	-1.29	0.0989	1721	0.991	0.901	16208	0.996
NBR1	-5.91	12	-1.29	0.0989	1722	0.991	0.901	16207	0.996
KRT3	-5.91	12	-1.29	0.0989	1723	0.991	0.901	16206	0.996
ODAM	-5.91	12	-1.29	0.099	1724	0.991	0.901	16205	0.996
CEP44	-5.91	12	-1.29	0.099	1725	0.991	0.901	16204	0.996
AOAH	-5.91	12	-1.29	0.099	1726	0.991	0.901	16203	0.996
CALML6	-5.91	12	-1.29	0.099	1727	0.991	0.901	16202	0.996
ARHGAP17	-5.65	11	-1.29	0.0991	1728	0.991	0.901	16201	0.996
ZC2HC1A	-5.9	12	-1.29	0.0994	1729	0.991	0.901	16200	0.996
CCT5	-5.64	11	-1.28	0.0995	1730	0.991	0.901	16199	0.996
GPRIN1	-5.89	12	-1.28	0.0995	1731	0.991	0.9	16198	0.996
LONP2	-5.89	12	-1.28	0.0996	1732	0.991	0.9	16197	0.996
TFAP2C	-5.89	12	-1.28	0.0996	1733	0.991	0.9	16196	0.996
ZNF486	-4.16	6	-1.28	0.0997	1734	0.991	0.9	16195	0.996
TSC22D4	-5.89	12	-1.28	0.0999	1735	0.991	0.9	16194	0.996
H2AFX	-5.89	12	-1.28	0.0999	1736	0.991	0.9	16193	0.996
ARHGAP4	-5.88	12	-1.28	0.1	1737	0.991	0.9	16192	0.996
PRKCZ	-5.88	12	-1.28	0.1	1738	0.991	0.9	16191	0.996
ALPPL2	-4.16	6	-1.28	0.1	1739	0.991	0.9	16190	0.996
PCDHGA1	-5.87	12	-1.28	0.1	1740	0.991	0.9	16189	0.996
KIF2A	-5.87	12	-1.28	0.1	1741	0.991	0.9	16188	0.996
2021-09-14	-5.87	12	-1.28	0.1	1742	0.991	0.9	16187	0.996
RSBN1L	-5.87	12	-1.28	0.1	1743	0.991	0.9	16186	0.996
MAP4K5	-5.87	12	-1.28	0.101	1744	0.991	0.899	16185	0.996
FAM178A	-5.87	12	-1.28	0.101	1745	0.991	0.899	16184	0.996
C19orf47	-5.87	12	-1.28	0.101	1746	0.991	0.899	16183	0.996
DLK2	-5.87	12	-1.28	0.101	1747	0.991	0.899	16182	0.996
GRK1	-5.87	12	-1.28	0.101	1748	0.991	0.899	16181	0.996
ST3GAL5	-5.87	12	-1.28	0.101	1749	0.991	0.899	16180	0.996
PAGE1	-5.87	12	-1.28	0.101	1750	0.991	0.899	16179	0.996
COL11A2	-5.87	12	-1.28	0.101	1751	0.991	0.899	16178	0.996
APLNR	-5.87	12	-1.28	0.101	1752	0.991	0.899	16177	0.996
GLTPD2	-5.87	12	-1.28	0.101	1753	0.991	0.899	16176	0.996
ARHGEF9	-5.87	12	-1.28	0.101	1754	0.991	0.899	16175	0.996
DYNC2H1	-5.86	12	-1.28	0.101	1755	0.991	0.899	16174	0.996
NUPL1	-5.86	12	-1.28	0.101	1756	0.991	0.899	16173	0.996
HIST1H2AB	-5.08	9	-1.28	0.101	1757	0.991	0.899	16172	0.996
KLB	-5.86	12	-1.28	0.101	1758	0.991	0.899	16171	0.996
GPR133	-5.86	12	-1.27	0.101	1759	0.991	0.899	16170	0.996
AHDC1	-5.85	12	-1.27	0.101	1760	0.991	0.899	16169	0.996
PGF	-5.85	12	-1.27	0.102	1761	0.991	0.898	16168	0.996
ACY3	-5.85	12	-1.27	0.102	1762	0.991	0.898	16167	0.996
EPB41L2	-5.85	12	-1.27	0.102	1763	0.991	0.898	16166	0.996
PCNP	-5.06	9	-1.27	0.102	1764	0.991	0.898	16165	0.996
C22orf31	-5.85	12	-1.27	0.102	1765	0.991	0.898	16164	0.996
SIRT5	-5.85	12	-1.27	0.102	1766	0.991	0.898	16163	0.996
OR2V2	-5.84	12	-1.27	0.102	1767	0.991	0.898	16162	0.996
SPSB2	-5.84	12	-1.27	0.102	1768	0.991	0.898	16161	0.996
GLYATL2	-5.84	12	-1.27	0.102	1769	0.991	0.898	16160	0.996
EPT1	-5.06	9	-1.27	0.102	1770	0.991	0.898	16159	0.996
COG1	-5.84	12	-1.27	0.102	1771	0.991	0.898	16158	0.996
CCDC96	-5.83	12	-1.27	0.102	1772	0.991	0.898	16157	0.996
NEURL1B	-5.82	12	-1.27	0.103	1773	0.991	0.897	16156	0.996
DHX38	-5.82	12	-1.27	0.103	1774	0.991	0.897	16155	0.996
TBL2	-5.82	12	-1.27	0.103	1775	0.991	0.897	16154	0.996
C2CD2	-5.82	12	-1.27	0.103	1776	0.991	0.897	16153	0.996
PAF1	-5.82	12	-1.27	0.103	1777	0.991	0.897	16152	0.996
OR4C46	-5.82	12	-1.26	0.103	1778	0.991	0.897	16151	0.996
OR10G3	-5.82	12	-1.26	0.103	1779	0.991	0.897	16150	0.996
KLRG2	-5.82	12	-1.26	0.103	1780	0.991	0.897	16149	0.996
PLG	-5.81	12	-1.26	0.103	1781	0.991	0.897	16148	0.996
AXIN2	-5.81	12	-1.26	0.103	1782	0.991	0.897	16147	0.996
OR4C6	-5.81	12	-1.26	0.103	1783	0.991	0.897	16146	0.996
TMCO3	-5.81	12	-1.26	0.103	1784	0.991	0.897	16145	0.996
HOXC12	-5.81	12	-1.26	0.103	1785	0.991	0.897	16144	0.996
SLX4IP	-5.81	12	-1.26	0.103	1786	0.991	0.897	16143	0.996
SELL	-5.81	12	-1.26	0.103	1787	0.991	0.897	16142	0.996
MLF1IP	-5.81	12	-1.26	0.104	1788	0.991	0.896	16141	0.996
GON4L	-5.81	12	-1.26	0.104	1789	0.991	0.896	16140	0.996
GABRG2	-5.81	12	-1.26	0.104	1790	0.991	0.896	16139	0.996
COL15A1	-5.8	12	-1.26	0.104	1791	0.991	0.896	16138	0.996
OTUD5	-5.8	12	-1.26	0.104	1792	0.991	0.896	16137	0.996
DDX53	-5.8	12	-1.26	0.104	1793	0.991	0.896	16136	0.996
PGAM5	-5.8	12	-1.26	0.104	1794	0.991	0.896	16135	0.996
GABPA	-5.8	12	-1.26	0.104	1795	0.991	0.896	16134	0.996
CREB3L3	-5.8	12	-1.26	0.104	1796	0.991	0.896	16133	0.996
CD164	-5.8	12	-1.26	0.104	1797	0.991	0.896	16132	0.996
DEFB119	-5.79	12	-1.26	0.104	1798	0.991	0.896	16131	0.996
PDE12	-5.79	12	-1.26	0.104	1799	0.991	0.896	16130	0.996
AAMDC	-5.79	12	-1.26	0.104	1800	0.991	0.896	16129	0.996
TMEM62	-5.79	12	-1.26	0.104	1801	0.991	0.896	16128	0.996
C17orf53	-5.79	12	-1.26	0.104	1802	0.991	0.896	16127	0.996
DTX1	-5.79	12	-1.26	0.104	1803	0.991	0.896	16126	0.996
PGAP1	-5.79	12	-1.26	0.104	1804	0.991	0.896	16125	0.996
CAPN13	-5.79	12	-1.26	0.104	1805	0.991	0.896	16124	0.996
CTNNBIP1	-5.79	12	-1.26	0.105	1806	0.991	0.895	16123	0.996
DPY19L4	-5.78	12	-1.26	0.105	1807	0.991	0.895	16122	0.996
CLC	-5.78	12	-1.26	0.105	1808	0.991	0.895	16121	0.996
DRD4	-5.78	12	-1.25	0.105	1809	0.991	0.895	16120	0.996
TRIM7	-5.78	12	-1.25	0.105	1810	0.991	0.895	16119	0.996
DGKH	-5.78	12	-1.25	0.105	1811	0.991	0.895	16118	0.996
PTEN	-5.78	12	-1.25	0.105	1812	0.991	0.895	16117	0.996
THAP5	-5.78	12	-1.25	0.105	1813	0.991	0.895	16116	0.996
NMUR1	-5.78	12	-1.25	0.105	1814	0.991	0.895	16115	0.996
CD52	-5	9	-1.25	0.105	1815	0.991	0.895	16114	0.996
ABCC12	-5.78	12	-1.25	0.105	1816	0.991	0.895	16113	0.996
SCAP	-5.78	12	-1.25	0.105	1817	0.991	0.895	16112	0.996
OXT	-5.77	12	-1.25	0.105	1818	0.991	0.895	16111	0.996
MICALL1	-5.77	12	-1.25	0.105	1819	0.991	0.895	16110	0.996
RANBP6	-5.77	12	-1.25	0.105	1820	0.991	0.895	16109	0.996
F3	-5.77	12	-1.25	0.105	1821	0.991	0.895	16108	0.996
AQP8	-5.77	12	-1.25	0.105	1822	0.991	0.895	16107	0.996
SCLT1	-5.76	12	-1.25	0.106	1823	0.991	0.894	16106	0.996
C12orf66	-5.76	12	-1.25	0.106	1824	0.991	0.894	16105	0.996
TCAIM	-5.76	12	-1.25	0.106	1825	0.991	0.894	16104	0.996
CHMP4C	-5.76	12	-1.25	0.106	1826	0.991	0.894	16103	0.996
ELSPBP1	-5.76	12	-1.25	0.106	1827	0.991	0.894	16102	0.996
RNF166	-5.76	12	-1.25	0.106	1828	0.991	0.894	16101	0.996
SYP	-5.76	12	-1.25	0.106	1829	0.991	0.894	16100	0.996
MASP1	-5.76	12	-1.25	0.106	1830	0.991	0.894	16099	0.996
CGRRF1	-5.76	12	-1.25	0.106	1831	0.991	0.894	16098	0.996
DUOXA2	-5.75	12	-1.25	0.106	1832	0.991	0.894	16097	0.996
SLC17A1	-5.75	12	-1.25	0.106	1833	0.991	0.894	16096	0.996
DTD1	-4.98	9	-1.25	0.106	1834	0.991	0.894	16095	0.996
FANCD2OS	-5.75	12	-1.25	0.106	1835	0.991	0.894	16094	0.996
KRI1	-5.75	12	-1.25	0.106	1836	0.991	0.894	16093	0.996
SH2D6	-5.75	12	-1.25	0.106	1837	0.991	0.894	16092	0.996
SIX4	-5.75	12	-1.25	0.106	1838	0.991	0.894	16091	0.996
C20orf173	-5.75	12	-1.25	0.106	1839	0.991	0.894	16090	0.996
ABCB4	-5.74	12	-1.25	0.107	1840	0.991	0.893	16089	0.996
PRAP1	-5.74	12	-1.25	0.107	1841	0.991	0.893	16088	0.996
SRPK3	-5.74	12	-1.25	0.107	1842	0.991	0.893	16087	0.996
GPR110	-5.74	12	-1.24	0.107	1843	0.991	0.893	16086	0.996
SH3BP5L	-5.74	12	-1.24	0.107	1844	0.991	0.893	16085	0.996
ZIC3	-5.74	12	-1.24	0.107	1845	0.991	0.893	16084	0.996
DUOX1	-5.74	12	-1.24	0.107	1846	0.991	0.893	16083	0.996
UBE2Q1	-5.74	12	-1.24	0.107	1847	0.991	0.893	16082	0.996
RC3H1	-5.74	12	-1.24	0.107	1848	0.991	0.893	16081	0.996
FAM194B	-5.74	12	-1.24	0.107	1849	0.991	0.893	16080	0.996
ZNF592	-5.74	12	-1.24	0.107	1850	0.991	0.893	16079	0.996
HSF2BP	-5.74	12	-1.24	0.107	1851	0.991	0.893	16078	0.996
TYW5	-5.73	12	-1.24	0.107	1852	0.991	0.893	16077	0.996
RNF169	-5.73	12	-1.24	0.107	1853	0.991	0.893	16076	0.996
KLHL12	-5.73	12	-1.24	0.107	1854	0.991	0.893	16075	0.996
SLC29A2	-5.73	12	-1.24	0.107	1855	0.991	0.893	16074	0.996
BTN1A1	-5.73	12	-1.24	0.107	1856	0.991	0.893	16073	0.996
RTN4	-5.73	12	-1.24	0.107	1857	0.991	0.893	16072	0.996
CXorf57	-5.72	12	-1.24	0.108	1858	0.991	0.892	16071	0.996
HARS2	-5.72	12	-1.24	0.108	1859	0.991	0.892	16070	0.995
CASC4	-5.72	12	-1.24	0.108	1860	0.991	0.892	16069	0.995
KIAA0895L	-5.72	12	-1.24	0.108	1861	0.991	0.892	16068	0.995
VSTM2A	-5.72	12	-1.24	0.108	1862	0.991	0.892	16067	0.995
HNRNPF	-5.71	12	-1.24	0.108	1863	0.991	0.892	16066	0.995
CRHBP	-5.71	12	-1.24	0.108	1864	0.991	0.892	16065	0.995
LTBP1	-5.71	12	-1.24	0.108	1865	0.991	0.892	16064	0.995
ZC3H13	-4.95	9	-1.24	0.108	1866	0.991	0.892	16063	0.995
CPA1	-5.71	12	-1.24	0.108	1867	0.991	0.892	16062	0.995
DCTN5	-5.71	12	-1.24	0.108	1868	0.991	0.892	16061	0.995
UBE2W	-5.71	12	-1.24	0.108	1869	0.991	0.892	16060	0.995
NEK8	-5.71	12	-1.24	0.108	1870	0.991	0.892	16059	0.995
DESI2	-5.71	12	-1.24	0.108	1871	0.991	0.892	16058	0.995
CST9	-5.7	12	-1.24	0.108	1872	0.991	0.892	16057	0.995
ACP6	-5.7	12	-1.23	0.108	1873	0.991	0.892	16056	0.995
U2SURP	-5.7	12	-1.23	0.109	1874	0.991	0.891	16055	0.995
APBB1	-5.7	12	-1.23	0.109	1875	0.991	0.891	16054	0.995
ZCCHC2	-5.7	12	-1.23	0.109	1876	0.991	0.891	16053	0.995
PEX5L	-5.7	12	-1.23	0.109	1877	0.991	0.891	16052	0.995
COL2A1	-5.7	12	-1.23	0.109	1878	0.991	0.891	16051	0.995
UBE2A	-4.93	9	-1.23	0.109	1879	0.991	0.891	16050	0.995
SCN3A	-5.7	12	-1.23	0.109	1880	0.991	0.891	16049	0.995
TRIM27	-5.69	12	-1.23	0.109	1881	0.991	0.891	16048	0.995
PGBD4	-5.69	12	-1.23	0.109	1882	0.991	0.891	16047	0.995
ART4	-5.69	12	-1.23	0.109	1883	0.991	0.891	16046	0.995
ZNF330	-5.69	12	-1.23	0.109	1884	0.991	0.891	16045	0.995
RBM33	-5.69	12	-1.23	0.109	1885	0.991	0.891	16044	0.995
BIN1	-5.68	12	-1.23	0.109	1886	0.991	0.891	16043	0.995
PSMD2	-5.68	12	-1.23	0.109	1887	0.991	0.891	16042	0.995
UPP1	-5.68	12	-1.23	0.11	1888	0.991	0.89	16041	0.995
PTH2R	-5.68	12	-1.23	0.11	1889	0.991	0.89	16040	0.995
TMEM214	-5.68	12	-1.23	0.11	1890	0.991	0.89	16039	0.995
SLC15A2	-5.68	12	-1.23	0.11	1891	0.991	0.89	16038	0.995
MCMDC2	-5.68	12	-1.23	0.11	1892	0.991	0.89	16037	0.995
HEPHL1	-5.68	12	-1.23	0.11	1893	0.991	0.89	16036	0.995
DNAJC16	-5.67	12	-1.23	0.11	1894	0.991	0.89	16035	0.995
BEX1	-5.67	12	-1.23	0.11	1895	0.991	0.89	16034	0.995
BPNT1	-5.67	12	-1.23	0.11	1896	0.991	0.89	16033	0.995
ATG3	-5.67	12	-1.23	0.11	1897	0.991	0.89	16032	0.995
HSPG2	-5.67	12	-1.23	0.11	1898	0.991	0.89	16031	0.995
PARD6A	-5.67	12	-1.23	0.11	1899	0.991	0.89	16030	0.995
LPL	-5.67	12	-1.23	0.11	1900	0.991	0.89	16029	0.995
NOC4L	-5.67	12	-1.23	0.11	1901	0.991	0.89	16028	0.995
SND1	-5.67	12	-1.22	0.11	1902	0.991	0.89	16027	0.995
CAPG	-5.66	12	-1.22	0.11	1903	0.991	0.89	16026	0.995
ATP8B2	-5.66	12	-1.22	0.11	1904	0.991	0.89	16025	0.995
MAPK4	-5.66	12	-1.22	0.11	1905	0.991	0.89	16024	0.995
DEFB115	-5.66	12	-1.22	0.11	1906	0.991	0.89	16023	0.995
PTPRS	-5.66	12	-1.22	0.111	1907	0.991	0.889	16022	0.995
LUZP2	-5.66	12	-1.22	0.111	1908	0.991	0.889	16021	0.995
REV1	-5.66	12	-1.22	0.111	1909	0.991	0.889	16020	0.995
ACTG1	-5.65	12	-1.22	0.111	1910	0.991	0.889	16019	0.995
USP36	-5.65	12	-1.22	0.111	1911	0.991	0.889	16018	0.995
C9orf3	-5.65	12	-1.22	0.111	1912	0.991	0.889	16017	0.995
UGGT1	-4.89	9	-1.22	0.111	1913	0.991	0.889	16016	0.995
TEDDM1	-5.65	12	-1.22	0.111	1914	0.991	0.889	16015	0.995
KATNAL1	-5.65	12	-1.22	0.111	1915	0.991	0.889	16014	0.995
KRT9	-5.65	12	-1.22	0.111	1916	0.991	0.889	16013	0.995
KDSR	-5.64	12	-1.22	0.111	1917	0.991	0.889	16012	0.995
VMP1	-5.64	12	-1.22	0.111	1918	0.991	0.889	16011	0.995
HOXA2	-5.64	12	-1.22	0.111	1919	0.991	0.889	16010	0.995
C8orf47	-5.64	12	-1.22	0.111	1920	0.991	0.889	16009	0.995
ZFYVE19	-5.64	12	-1.22	0.111	1921	0.991	0.889	16008	0.995
C2orf78	-5.64	12	-1.22	0.111	1922	0.991	0.889	16007	0.995
ATP9B	-5.64	12	-1.22	0.111	1923	0.991	0.889	16006	0.995
IQUB	-5.64	12	-1.22	0.111	1924	0.991	0.889	16005	0.995
MGME1	-5.64	12	-1.22	0.112	1925	0.991	0.888	16004	0.995
SSBP3	-5.64	12	-1.22	0.112	1926	0.991	0.888	16003	0.995
C12orf43	-3.99	6	-1.22	0.112	1927	0.991	0.888	16002	0.995
ZC3H6	-5.64	12	-1.22	0.112	1928	0.991	0.888	16001	0.995
FXN	-5.64	12	-1.22	0.112	1929	0.991	0.888	16000	0.995
YARS	-5.4	11	-1.22	0.112	1930	0.991	0.888	15999	0.995
PTPRG	-5.64	12	-1.22	0.112	1931	0.991	0.888	15998	0.995
SPATA32	-5.64	12	-1.22	0.112	1932	0.991	0.888	15997	0.995
BRINP3	-5.63	12	-1.22	0.112	1933	0.991	0.888	15996	0.995
TTC39C	-5.63	12	-1.22	0.112	1934	0.991	0.888	15995	0.995
KIAA1462	-5.63	12	-1.22	0.112	1935	0.991	0.888	15994	0.995
WNT5A	-5.63	12	-1.22	0.112	1936	0.991	0.888	15993	0.995
GSE1	-5.63	12	-1.22	0.112	1937	0.991	0.888	15992	0.995
GJA1	-5.63	12	-1.22	0.112	1938	0.991	0.888	15991	0.995
TRIB3	-5.63	12	-1.22	0.112	1939	0.991	0.888	15990	0.995
CD300LG	-5.63	12	-1.21	0.112	1940	0.991	0.888	15989	0.995
ZNF644	-5.63	12	-1.21	0.112	1941	0.991	0.888	15988	0.995
RGS16	-5.62	12	-1.21	0.112	1942	0.991	0.888	15987	0.995
CORO6	-5.62	12	-1.21	0.113	1943	0.991	0.887	15986	0.995
NEFM	-5.62	12	-1.21	0.113	1944	0.991	0.887	15985	0.995
CDKN3	-5.62	12	-1.21	0.113	1945	0.991	0.887	15984	0.995
SPINK13	-5.61	12	-1.21	0.113	1946	0.991	0.887	15983	0.995
TMEM98	-5.61	12	-1.21	0.113	1947	0.991	0.887	15982	0.995
SPTLC3	-5.61	12	-1.21	0.113	1948	0.991	0.887	15981	0.995
C14orf119	-5.61	12	-1.21	0.113	1949	0.991	0.887	15980	0.995
PPP1R8	-5.61	12	-1.21	0.113	1950	0.991	0.887	15979	0.995
RNF113A	-5.61	12	-1.21	0.113	1951	0.991	0.887	15978	0.995
ZSCAN20	-5.61	12	-1.21	0.113	1952	0.991	0.887	15977	0.995
MDFIC	-5.61	12	-1.21	0.113	1953	0.991	0.887	15976	0.995
CCNG1	-5.61	12	-1.21	0.113	1954	0.991	0.887	15975	0.995
FBXO28	-5.61	12	-1.21	0.113	1955	0.991	0.887	15974	0.995
MYT1L	-5.6	12	-1.21	0.113	1956	0.991	0.887	15973	0.995
OR1A1	-5.6	12	-1.21	0.114	1957	0.991	0.886	15972	0.995
ELP6	-5.6	12	-1.21	0.114	1958	0.991	0.886	15971	0.995
OR2AE1	-5.6	12	-1.21	0.114	1959	0.991	0.886	15970	0.995
GATSL3	-5.6	12	-1.21	0.114	1960	0.991	0.886	15969	0.995
DNMT3B	-5.6	12	-1.21	0.114	1961	0.991	0.886	15968	0.995
LSM5	-4.85	9	-1.21	0.114	1962	0.991	0.886	15967	0.995
EPHB4	-5.59	12	-1.21	0.114	1963	0.991	0.886	15966	0.995
NSUN5	-5.59	12	-1.21	0.114	1964	0.991	0.886	15965	0.995
ENSA	-5.59	12	-1.21	0.114	1965	0.991	0.886	15964	0.995
GPR173	-5.59	12	-1.21	0.114	1966	0.991	0.886	15963	0.995
FNDC4	-5.59	12	-1.21	0.114	1967	0.991	0.886	15962	0.995
FAM71F2	-5.59	12	-1.2	0.114	1968	0.991	0.886	15961	0.995
PCDHB8	-4.84	9	-1.2	0.114	1969	0.991	0.886	15960	0.995
CMC4	-5.59	12	-1.2	0.114	1970	0.991	0.886	15959	0.995
PCP4	-5.59	12	-1.2	0.114	1971	0.991	0.886	15958	0.995
IL10RB	-5.59	12	-1.2	0.114	1972	0.991	0.886	15957	0.995
PTPMT1	-5.59	12	-1.2	0.114	1973	0.991	0.886	15956	0.995
RNASEH1	-5.58	12	-1.2	0.114	1974	0.991	0.886	15955	0.995
ATG7	-5.58	12	-1.2	0.114	1975	0.991	0.886	15954	0.995
PCDHA6	-5.58	12	-1.2	0.114	1976	0.991	0.886	15953	0.995
ADD2	-5.58	12	-1.2	0.114	1977	0.991	0.886	15952	0.995
GGT6	-5.58	12	-1.2	0.114	1978	0.991	0.886	15951	0.995
ZG16	-5.58	12	-1.2	0.115	1979	0.991	0.885	15950	0.995
HEPH	-5.58	12	-1.2	0.115	1980	0.991	0.885	15949	0.995
ITIH6	-5.58	12	-1.2	0.115	1981	0.991	0.885	15948	0.995
COX4I2	-5.58	12	-1.2	0.115	1982	0.991	0.885	15947	0.995
FCHO2	-5.58	12	-1.2	0.115	1983	0.991	0.885	15946	0.995
SLC6A8	-5.58	12	-1.2	0.115	1984	0.991	0.885	15945	0.995
ATG2A	-5.57	12	-1.2	0.115	1985	0.991	0.885	15944	0.995
MZT2B	-5.57	12	-1.2	0.115	1986	0.991	0.885	15943	0.995
HN1	-5.57	12	-1.2	0.115	1987	0.991	0.885	15942	0.995
ISPD	-5.57	12	-1.2	0.115	1988	0.991	0.885	15941	0.995
TRAPPC8	-4.82	9	-1.2	0.115	1989	0.991	0.885	15940	0.995
AGO1	-5.57	12	-1.2	0.115	1990	0.991	0.885	15939	0.995
VPS37D	-5.56	12	-1.2	0.115	1991	0.991	0.885	15938	0.995
LRRC10B	-5.56	12	-1.2	0.115	1992	0.991	0.885	15937	0.995
C11orf83	-5.56	12	-1.2	0.115	1993	0.991	0.885	15936	0.995
RRAGB	-5.56	12	-1.2	0.116	1994	0.991	0.884	15935	0.995
EPHA10	-5.56	12	-1.2	0.116	1995	0.991	0.884	15934	0.995
RGS21	-5.07	10	-1.2	0.116	1996	0.991	0.884	15933	0.995
C16orf13	-5.56	12	-1.2	0.116	1997	0.991	0.884	15932	0.995
TEX2	-5.55	12	-1.2	0.116	1998	0.991	0.884	15931	0.995
FAM91A1	-5.55	12	-1.2	0.116	1999	0.991	0.884	15930	0.995
[truncated: 15,929 more rows]
