# Supplementary material for: Genome-Wide CRISPR Screens Reveal ZATT as a Synthetic Lethal Target of TOP2-Poison Etoposide That Can Act in a TDP2-Independent Pathway
Source: Int J Mol Sci. 2023 Mar 31;24(7):6545. doi: 10.3390/ijms24076545 (PMC10095316; doi:10.3390/ijms24076545)
Supplement: Supplementary file 1 [file ijms-24-06545-s001.zip › Table S3. Drug Z score ranking of ETO co-essential genes in ZATT KO cells.xlsx]

## Sheet: ZNF451KO_ETO
GENE	sumZ	numObs	normZ	pval_synth	rank_synth	fdr_synth	pval_supp	rank_supp	fdr_supp
ABCC1	-68.53	12	-14.76	1.39e-49	1	2.49e-45	1	17929	1
TDP2	-49.68	12	-10.65	8.95e-27	2	8.02e-23	1	17928	1
FZR1	-44.56	12	-9.53	7.67e-22	3	4.58e-18	1	17927	1
RAD51D	-42.78	12	-9.14	3.03e-20	4	1.36e-16	1	17926	1
CCNA2	-37.72	12	-8.04	4.48e-16	5	1.61e-12	1	17925	1
RAD51B	-34.83	12	-7.41	6.24e-14	6	1.87e-10	1	17924	1
ZNF451	-34.02	12	-7.23	2.36e-13	7	6.04e-10	1	17923	1
FOXM1	-32.18	12	-6.83	4.14e-12	8	9.29e-09	1	17922	1
HDAC3	-31.09	12	-6.6	2.12e-11	9	4.23e-08	1	17921	1
LIG4	-28.76	12	-6.09	5.73e-10	10	1.03e-06	1	17920	1
USP48	-28.46	12	-6.02	8.67e-10	11	1.35e-06	1	17919	1
XRCC2	-28.43	12	-6.01	9.02e-10	12	1.35e-06	1	17918	1
MPHOSPH8	-26.85	12	-5.67	7.1e-09	13	9.79e-06	1	17917	1
UBE2C	-26.16	12	-5.52	1.68e-08	14	2.15e-05	1	17916	1
VMA21	-25.93	12	-5.47	2.23e-08	15	2.67e-05	1	17915	1
MAD2L2	-25.68	12	-5.42	3.04e-08	16	3.41e-05	1	17914	1
XIAP	-25.62	12	-5.4	3.29e-08	17	3.41e-05	1	17913	1
XRCC4	-25.58	12	-5.39	3.43e-08	18	3.41e-05	1	17912	1
KPNA2	-25.3	12	-5.33	4.84e-08	19	4.57e-05	1	17911	1
KIAA1586	-21.82	9	-5.31	5.44e-08	20	4.88e-05	1	17910	1
HEXIM1	-24.94	12	-5.25	7.45e-08	21	6.36e-05	1	17909	1
UBE2S	-23.86	12	-5.02	2.6e-07	22	0.000209	1	17908	1
KLHL15	-23.83	12	-5.01	2.68e-07	23	0.000209	1	17907	1
TOP1	-23.75	12	-4.99	2.94e-07	24	0.00022	1	17906	1
POLE4	-23.56	12	-4.95	3.65e-07	25	0.000262	1	17905	1
ANAPC7	-23.19	12	-4.87	5.51e-07	26	0.00038	1	17904	1
STRAP	-22.97	12	-4.83	6.96e-07	27	0.000462	1	17903	1
NAA25	-22.63	12	-4.75	1.01e-06	28	0.000648	1	17902	1
NHEJ1	-22.04	12	-4.62	1.9e-06	29	0.00117	1	17901	1
DDX11	-21.4	12	-4.48	3.68e-06	30	0.0022	1	17900	1
CAPRIN1	-21.3	12	-4.46	4.09e-06	31	0.00237	1	17899	1
SAFB	-21.02	12	-4.4	5.43e-06	32	0.00304	1	17898	1
HIRA	-20.9	12	-4.37	6.11e-06	33	0.00332	1	17897	1
RPRD1B	-20.8	12	-4.35	6.75e-06	34	0.00356	1	17896	1
DSCC1	-20.74	12	-4.34	7.14e-06	35	0.00366	1	17895	1
KHSRP	-20.62	12	-4.31	8.08e-06	36	0.00403	1	17894	1
PDS5B	-20.49	12	-4.29	9.14e-06	37	0.00443	1	17893	1
NUDCD3	-20.24	12	-4.23	1.17e-05	38	0.00544	1	17892	1
CHTF8	-20.23	12	-4.23	1.18e-05	39	0.00544	1	17891	1
DHX9	-20.12	12	-4.2	1.32e-05	40	0.00591	1	17890	1
PPP1R8	-19.94	12	-4.16	1.56e-05	41	0.00684	1	17889	1
ATM	-19.8	12	-4.13	1.78e-05	42	0.0076	1	17888	1
OTUD5	-19.63	12	-4.1	2.1e-05	43	0.00874	1	17887	1
C17orf53	-19.37	12	-4.04	2.68e-05	44	0.0109	1	17886	1
FEN1	-19.18	12	-4	3.17e-05	45	0.0126	1	17885	1
CLCF1	-19.02	12	-3.96	3.68e-05	46	0.0143	1	17884	1
XRCC3	-18.87	12	-3.93	4.22e-05	47	0.0161	1	17883	1
LCMT1	-18.83	12	-3.92	4.36e-05	48	0.0162	1	17882	1
ANAPC4	-18.82	12	-3.92	4.43e-05	49	0.0162	1	17881	1
RAD51	-18.56	12	-3.86	5.6e-05	50	0.0197	1	17880	1
HGS	-18.55	12	-3.86	5.61e-05	51	0.0197	1	17879	1
TP53BP1	-18.19	12	-3.78	7.74e-05	52	0.0267	1	17878	1
NDNL2	-18.15	12	-3.77	8e-05	53	0.0271	1	17877	1
POLE3	-18.13	12	-3.77	8.17e-05	54	0.0271	1	17876	1
RAD50	-18.04	12	-3.75	8.83e-05	55	0.0288	1	17875	1
ESCO2	-17.89	12	-3.72	0.000101	56	0.0323	1	17874	1
FBXO42	-17.78	12	-3.69	0.000111	57	0.0348	1	17873	1
NAA20	-17.75	12	-3.69	0.000114	58	0.0352	1	17872	1
IPO9	-17.63	12	-3.66	0.000125	59	0.0381	1	17871	1
SMCHD1	-17.6	12	-3.66	0.000128	60	0.0384	1	17870	1
ZMYM2	-17.53	12	-3.64	0.000136	61	0.0401	1	17869	1
ATP6V1C1	-17.39	12	-3.61	0.000154	62	0.0446	1	17868	1
DCP2	-17.22	12	-3.57	0.000177	63	0.0505	1	17867	1
DBF4	-17.1	12	-3.54	0.000197	64	0.0543	1	17866	1
KDM5C	-17.09	12	-3.54	0.000197	65	0.0543	1	17865	1
PPM1G	-17.02	12	-3.53	0.00021	66	0.0571	1	17864	1
ABCC6	-16.96	12	-3.51	0.00022	67	0.0589	1	17863	1
RBM12	-16.85	12	-3.49	0.000241	68	0.0637	1	17862	1
PPP4C	-16.75	12	-3.47	0.000261	69	0.0679	1	17861	1
TFB2M	-16.66	12	-3.45	0.00028	70	0.0713	1	17860	1
ESCO1	-16.65	12	-3.45	0.000282	71	0.0713	1	17859	1
MGEA5	-16.62	12	-3.44	0.000291	72	0.0724	1	17858	1
CLTC	-16.56	12	-3.43	0.000304	73	0.0747	1	17857	1
C20orf196	-16.49	12	-3.41	0.000322	74	0.0781	1	17856	1
ERCC6L2	-16.38	12	-3.39	0.000351	75	0.0838	1	17855	1
WDR61	-16.32	12	-3.38	0.000368	76	0.0869	1	17854	1
PPP6C	-16.25	12	-3.36	0.000391	77	0.0903	1	17853	1
RBM14	-16.24	12	-3.36	0.000393	78	0.0903	1	17852	1
SRSF10	-16.19	12	-3.35	0.000407	79	0.0925	1	17851	1
HIST1H1E	-16.18	12	-3.34	0.000413	80	0.0925	1	17850	1
DCLRE1C	-16.06	12	-3.32	0.000452	81	0.1	1	17849	1
CSDE1	-15.8	12	-3.26	0.000554	82	0.121	0.999	17848	1
FCHO2	-15.77	12	-3.26	0.000565	83	0.122	0.999	17847	1
TEN1	-15.68	12	-3.24	0.000605	84	0.129	0.999	17846	1
SMEK1	-15.67	12	-3.23	0.000613	85	0.129	0.999	17845	1
PALB2	-15.64	12	-3.23	0.000624	86	0.13	0.999	17844	1
EWSR1	-15.59	12	-3.22	0.000649	87	0.134	0.999	17843	1
ATP6V1H	-15.47	12	-3.19	0.000711	88	0.145	0.999	17842	1
CCDC115	-15.46	12	-3.19	0.000717	89	0.145	0.999	17841	1
RAD54L2	-15.44	12	-3.18	0.000728	90	0.145	0.999	17840	1
SMARCB1	-15.36	12	-3.17	0.00077	91	0.152	0.999	17839	1
PRKAR1A	-15.33	12	-3.16	0.000788	92	0.153	0.999	17838	1
EDC4	-14.99	12	-3.09	0.00101	93	0.195	0.999	17837	1
CRAMP1L	-14.95	12	-3.08	0.00105	94	0.2	0.999	17836	1
NSMCE1	-14.88	12	-3.06	0.0011	95	0.208	0.999	17835	1
TCERG1	-14.82	12	-3.05	0.00115	96	0.216	0.999	17834	1
VPS37A	-14.77	12	-3.04	0.0012	97	0.221	0.999	17833	1
ATF7IP	-14.73	12	-3.03	0.00123	98	0.221	0.999	17832	1
PRKRA	-14.73	12	-3.03	0.00123	99	0.221	0.999	17831	1
BRCA2	-14.73	12	-3.03	0.00123	100	0.221	0.999	17830	1
SCAP	-14.69	12	-3.02	0.00126	101	0.224	0.999	17829	1
DYNLL1	-7.32	3	-3.01	0.00131	102	0.226	0.999	17828	1
PUM1	-14.64	12	-3.01	0.00131	103	0.226	0.999	17827	1
ATP8B2	-14.64	12	-3.01	0.00131	104	0.226	0.999	17826	1
ZFYVE20	-14.6	12	-3	0.00134	105	0.229	0.999	17825	1
CDK2	-14.59	12	-3	0.00136	106	0.229	0.999	17824	1
CTDSPL2	-14.52	12	-2.98	0.00142	107	0.239	0.999	17823	1
CDCA5	-14.5	12	-2.98	0.00145	108	0.24	0.999	17822	1
SETD1A	-14.47	12	-2.97	0.00148	109	0.243	0.999	17821	1
CHD8	-14.46	12	-2.97	0.00149	110	0.243	0.999	17820	1
AGFG1	-14.4	12	-2.96	0.00155	111	0.25	0.998	17819	1
RAD54L	-14.39	12	-2.96	0.00156	112	0.25	0.998	17818	1
CMPK1	-14.38	12	-2.95	0.00157	113	0.25	0.998	17817	1
PAAF1	-14.36	12	-2.95	0.00159	114	0.25	0.998	17816	1
RABGEF1	-14.35	12	-2.95	0.0016	115	0.25	0.998	17815	1
NDE1	-14.27	12	-2.93	0.0017	116	0.263	0.998	17814	1
ADAR	-14.23	12	-2.92	0.00175	117	0.269	0.998	17813	1
AMBRA1	-14.17	12	-2.91	0.00183	118	0.276	0.998	17812	1
VDAC3	-14.17	12	-2.91	0.00183	119	0.276	0.998	17811	1
RB1	-14.14	12	-2.9	0.00186	120	0.278	0.998	17810	1
THNSL2	-14.11	12	-2.89	0.00191	121	0.28	0.998	17809	1
EHD1	-14.11	12	-2.89	0.00191	122	0.28	0.998	17808	1
PET117	-14.1	12	-2.89	0.00192	123	0.28	0.998	17807	1
MATR3	-13.97	12	-2.86	0.00209	124	0.3	0.998	17806	1
DOLK	-13.97	12	-2.86	0.0021	125	0.3	0.998	17805	1
HUS1	-13.96	12	-2.86	0.00212	126	0.3	0.998	17804	1
VPS18	-13.95	12	-2.86	0.00212	127	0.3	0.998	17803	1
LRP10	-13.9	12	-2.85	0.0022	128	0.308	0.998	17802	1
ANKRD49	-13.89	12	-2.85	0.00222	129	0.308	0.998	17801	1
NRBP1	-13.85	12	-2.84	0.00227	130	0.314	0.998	17800	1
SFR1	-13.8	12	-2.83	0.00235	131	0.322	0.998	17799	1
EMC1	-13.79	12	-2.82	0.00238	132	0.323	0.998	17798	1
UIMC1	-13.76	12	-2.82	0.00242	133	0.326	0.998	17797	1
DICER1	-13.73	12	-2.81	0.00248	134	0.331	0.998	17796	1
PCBP2	-13.65	12	-2.79	0.0026	135	0.345	0.997	17795	1
CDC25B	-13.65	12	-2.79	0.00262	136	0.345	0.997	17794	1
UBR4	-13.44	12	-2.75	0.003	137	0.393	0.997	17793	1
N6AMT1	-13.36	12	-2.73	0.00318	138	0.411	0.997	17792	1
GNB1L	-11.56	9	-2.73	0.00319	139	0.411	0.997	17791	1
PCDHB3	-13.28	12	-2.71	0.00334	140	0.428	0.997	17790	1
OPRL1	-13.25	12	-2.71	0.0034	141	0.433	0.997	17789	1
KPNA3	-13.23	12	-2.7	0.00345	142	0.436	0.997	17788	1
ORC2	-13.21	12	-2.7	0.00349	143	0.437	0.997	17787	1
DEK	-13.19	12	-2.69	0.00353	144	0.44	0.996	17786	1
DYNC1LI1	-13.18	12	-2.69	0.00357	145	0.441	0.996	17785	1
WNK1	-13.14	12	-2.68	0.00366	146	0.449	0.996	17784	1
NDST1	-13.08	12	-2.67	0.0038	147	0.464	0.996	17783	1
MCM8	-13.06	12	-2.66	0.00385	148	0.465	0.996	17782	1
YARS2	-13.05	12	-2.66	0.00389	149	0.465	0.996	17781	1
LIN37	-13.04	12	-2.66	0.00389	150	0.465	0.996	17780	1
TSFM	-12.99	12	-2.65	0.00402	151	0.478	0.996	17779	1
UBR5	-12.98	12	-2.65	0.00406	152	0.478	0.996	17778	1
TUSC2	-12.97	12	-2.65	0.00408	153	0.478	0.996	17777	1
HNRNPLL	-12.96	12	-2.64	0.0041	154	0.478	0.996	17776	1
VPS16	-12.93	12	-2.64	0.00419	155	0.485	0.996	17775	1
AP2S1	-12.87	12	-2.62	0.00435	156	0.498	0.996	17774	1
FAM83C	-12.86	12	-2.62	0.00438	157	0.498	0.996	17773	1
TIAL1	-12.86	12	-2.62	0.00439	158	0.498	0.996	17772	1
SIPA1	-12.85	12	-2.62	0.00441	159	0.498	0.996	17771	1
ANAPC13	-12.78	12	-2.6	0.00461	160	0.515	0.995	17770	1
CASKIN1	-11.07	9	-2.6	0.00462	161	0.515	0.995	17769	1
STAG2	-12.74	12	-2.59	0.00474	162	0.524	0.995	17768	1
KIAA1524	-12.71	12	-2.59	0.00482	163	0.531	0.995	17767	1
MCM9	-12.67	12	-2.58	0.00493	164	0.539	0.995	17766	1
PPIL1	-12.65	12	-2.57	0.00501	165	0.54	0.995	17765	1
DDHD2	-12.65	12	-2.57	0.00502	166	0.54	0.995	17764	1
PICALM	-12.64	12	-2.57	0.00503	167	0.54	0.995	17763	1
UBTF	-12.63	12	-2.57	0.00507	168	0.54	0.995	17762	1
HSP90AB1	-12.61	12	-2.57	0.00512	169	0.54	0.995	17761	1
B3GNT2	-12.59	12	-2.56	0.00519	170	0.54	0.995	17760	1
DNTTIP1	-12.58	12	-2.56	0.00523	171	0.54	0.995	17759	1
USP37	-12.58	12	-2.56	0.00524	172	0.54	0.995	17758	1
KDM8	-12.58	12	-2.56	0.00524	173	0.54	0.995	17757	1
RAD17	-12.56	12	-2.56	0.0053	174	0.54	0.995	17756	1
TSC1	-12.56	12	-2.55	0.00531	175	0.54	0.995	17755	1
SLC29A2	-12.55	12	-2.55	0.00533	176	0.54	0.995	17754	1
MCEE	-12.55	12	-2.55	0.00533	177	0.54	0.995	17753	1
MDC1	-12.47	12	-2.54	0.00559	178	0.559	0.994	17752	1
TP53INP2	-12.47	12	-2.53	0.00562	179	0.559	0.994	17751	1
MND1	-12.44	12	-2.53	0.00571	180	0.559	0.994	17750	1
RASL11A	-12.43	12	-2.53	0.00574	181	0.559	0.994	17749	1
RBM39	-12.43	12	-2.53	0.00575	182	0.559	0.994	17748	1
ATP6V1F	-12.42	12	-2.53	0.00577	183	0.559	0.994	17747	1
GLA	-12.42	12	-2.53	0.00578	184	0.559	0.994	17746	1
PPIP5K2	-12.42	12	-2.52	0.0058	185	0.559	0.994	17745	1
CNOT3	-12.41	12	-2.52	0.00583	186	0.559	0.994	17744	1
PPP1R7	-12.41	12	-2.52	0.00583	187	0.559	0.994	17743	1
DNM2	-12.39	12	-2.52	0.00589	188	0.562	0.994	17742	1
CS	-12.37	12	-2.51	0.00597	189	0.566	0.994	17741	1
SMEK2	-12.29	12	-2.5	0.00626	190	0.591	0.994	17740	1
MGAT2	-12.26	12	-2.49	0.00637	191	0.598	0.994	17739	1
RECQL5	-12.24	12	-2.49	0.00645	192	0.602	0.994	17738	1
CCNB1	-12.23	12	-2.48	0.00648	193	0.602	0.994	17737	1
SETD2	-12.22	12	-2.48	0.00653	194	0.602	0.993	17736	1
CHMP6	-10.58	9	-2.48	0.00655	195	0.602	0.993	17735	1
SLC25A1	-12.2	12	-2.48	0.00663	196	0.606	0.993	17734	1
PCOLCE	-12.17	12	-2.47	0.00676	197	0.615	0.993	17733	1
FARS2	-12.15	12	-2.47	0.00682	198	0.617	0.993	17732	1
CENPL	-12.14	12	-2.46	0.00688	199	0.617	0.993	17731	1
CTNNBL1	-12.13	12	-2.46	0.0069	200	0.617	0.993	17730	1
SETDB1	-12.12	12	-2.46	0.00695	201	0.617	0.993	17729	1
DHX35	-12.12	12	-2.46	0.00696	202	0.617	0.993	17728	1
COG8	-12.09	12	-2.45	0.00709	203	0.627	0.993	17727	1
CHERP	-12.07	12	-2.45	0.00715	204	0.629	0.993	17726	1
POLA1	-12.04	12	-2.44	0.00732	205	0.64	0.993	17725	1
CFDP1	-11.95	12	-2.42	0.00772	206	0.671	0.992	17724	1
KDSR	-11.88	12	-2.41	0.00801	207	0.694	0.992	17723	1
CELF1	-11.87	12	-2.41	0.00808	208	0.694	0.992	17722	1
PLCG1	-11.87	12	-2.4	0.0081	209	0.694	0.992	17721	1
EFCAB10	-11.86	12	-2.4	0.00813	210	0.694	0.992	17720	1
PTGES3	-8.36	6	-2.4	0.0083	211	0.699	0.992	17719	1
XPO7	-11.83	12	-2.4	0.0083	212	0.699	0.992	17718	1
POFUT1	-11.82	12	-2.4	0.0083	213	0.699	0.992	17717	1
MBTD1	-11.78	12	-2.39	0.0085	214	0.709	0.991	17716	1
CCNK	-11.78	12	-2.39	0.00853	215	0.709	0.991	17715	1
PCBP1	-11.77	12	-2.38	0.00859	216	0.709	0.991	17714	1
PPP2R5D	-11.77	12	-2.38	0.0086	217	0.709	0.991	17713	1
ZNF646	-11.76	12	-2.38	0.00865	218	0.709	0.991	17712	1
BBS1	-11.75	12	-2.38	0.00866	219	0.709	0.991	17711	1
MCM4	-11.69	12	-2.37	0.009	220	0.729	0.991	17710	1
AEBP1	-11.69	12	-2.37	0.00901	221	0.729	0.991	17709	1
LYRM4	-11.68	12	-2.36	0.00902	222	0.729	0.991	17708	1
PTPMT1	-11.67	12	-2.36	0.0091	223	0.732	0.991	17707	1
DOK1	-11.64	12	-2.36	0.00925	224	0.737	0.991	17706	1
HIST1H2BL	-5.82	3	-2.36	0.00926	225	0.737	0.991	17705	1
LSM7	-11.63	12	-2.35	0.00929	226	0.737	0.991	17704	1
MDH2	-11.6	12	-2.35	0.00948	227	0.749	0.991	17703	1
TMEM127	-11.56	12	-2.34	0.00969	228	0.762	0.99	17702	1
INTS5	-11.55	12	-2.34	0.00976	229	0.763	0.99	17701	1
ZP3	-11.54	12	-2.33	0.00984	230	0.763	0.99	17700	1
SLC20A2	-11.53	12	-2.33	0.00986	231	0.763	0.99	17699	1
AAGAB	-11.53	12	-2.33	0.00988	232	0.763	0.99	17698	1
C16orf92	-11.52	12	-2.33	0.00991	233	0.763	0.99	17697	1
PSMC3IP	-11.48	12	-2.32	0.0101	234	0.777	0.99	17696	1
HIRIP3	-11.47	12	-2.32	0.0102	235	0.777	0.99	17695	1
TRIM26	-11.47	12	-2.32	0.0102	236	0.777	0.99	17694	1
SOD1	-11.46	12	-2.32	0.0103	237	0.777	0.99	17693	1
ATP6AP2	-11.44	12	-2.31	0.0104	238	0.777	0.99	17692	1
HIST1H4F	-11.44	12	-2.31	0.0104	239	0.777	0.99	17691	1
RTEL1	-11.44	12	-2.31	0.0104	240	0.777	0.99	17690	1
PBRM1	-11.41	12	-2.31	0.0106	241	0.786	0.989	17689	1
SUGT1	-11.37	12	-2.3	0.0108	242	0.801	0.989	17688	1
RALGAPB	-11.37	12	-2.3	0.0109	243	0.801	0.989	17687	1
DCTN6	-11.33	12	-2.29	0.0111	244	0.811	0.989	17686	1
PMF1	-11.33	12	-2.29	0.0111	245	0.811	0.989	17685	1
KATNB1	-11.31	12	-2.28	0.0112	246	0.811	0.989	17684	1
CD9	-11.31	12	-2.28	0.0112	247	0.811	0.989	17683	1
SPATS2	-11.3	12	-2.28	0.0113	248	0.811	0.989	17682	1
RAB11FIP5	-11.3	12	-2.28	0.0113	249	0.811	0.989	17681	1
ABCD4	-11.3	12	-2.28	0.0113	250	0.811	0.989	17680	1
C11orf42	-11.28	12	-2.28	0.0114	251	0.813	0.989	17679	1
GGA2	-11.27	12	-2.28	0.0115	252	0.813	0.989	17678	1
VCPIP1	-11.26	12	-2.27	0.0115	253	0.813	0.988	17677	1
COA6	-11.24	12	-2.27	0.0116	254	0.813	0.988	17676	1
ARL11	-11.24	12	-2.27	0.0117	255	0.813	0.988	17675	1
ANAPC1	-11.24	12	-2.27	0.0117	256	0.813	0.988	17674	1
ANTXR1	-11.23	12	-2.27	0.0117	257	0.813	0.988	17673	1
ADAM33	-11.22	12	-2.26	0.0118	258	0.813	0.988	17672	1
C6orf106	-11.21	12	-2.26	0.0119	259	0.813	0.988	17671	1
ANAPC15	-11.21	12	-2.26	0.0119	260	0.813	0.988	17670	1
CDC16	-11.21	12	-2.26	0.0119	261	0.813	0.988	17669	1
IL7	-11.2	12	-2.26	0.0119	262	0.813	0.988	17668	1
ABHD16A	-11.2	12	-2.26	0.0119	263	0.813	0.988	17667	1
CLEC4E	-11.16	12	-2.25	0.0122	264	0.828	0.988	17666	1
XPO5	-11.15	12	-2.25	0.0123	265	0.828	0.988	17665	1
PIK3C3	-11.15	12	-2.25	0.0123	266	0.828	0.988	17664	1
MTMR3	-11.12	12	-2.24	0.0125	267	0.841	0.987	17663	1
FAM216B	-11.11	12	-2.24	0.0126	268	0.842	0.987	17662	1
TPTE2	-9.6	9	-2.23	0.0127	269	0.842	0.987	17661	1
WIBG	-11.08	12	-2.23	0.0128	270	0.842	0.987	17660	1
WDR25	-11.06	12	-2.23	0.0129	271	0.842	0.987	17659	1
TMX1	-11.06	12	-2.23	0.013	272	0.842	0.987	17658	1
LARP7	-11.05	12	-2.23	0.013	273	0.842	0.987	17657	1
TRIP4	-11.05	12	-2.23	0.013	274	0.842	0.987	17656	1
TRIP12	-11.04	12	-2.23	0.013	275	0.842	0.987	17655	1
ING3	-11.04	12	-2.22	0.013	276	0.842	0.987	17654	1
RCOR1	-11.04	12	-2.22	0.0131	277	0.842	0.987	17653	1
PCM1	-11.04	12	-2.22	0.0131	278	0.842	0.987	17652	1
DIDO1	-11.03	12	-2.22	0.0131	279	0.842	0.987	17651	1
XRCC6	-10.98	12	-2.21	0.0135	280	0.862	0.987	17650	1
FANCM	-10.98	12	-2.21	0.0135	281	0.862	0.986	17649	1
AVP	-10.97	12	-2.21	0.0136	282	0.864	0.986	17648	1
ATG5	-10.96	12	-2.21	0.0137	283	0.866	0.986	17647	1
BOD1L1	-10.93	12	-2.2	0.0139	284	0.874	0.986	17646	1
KDM3A	-10.93	12	-2.2	0.0139	285	0.874	0.986	17645	1
DHX15	-10.92	12	-2.2	0.0139	286	0.874	0.986	17644	1
ZRANB1	-10.9	12	-2.19	0.0141	287	0.88	0.986	17643	1
TACC3	-10.9	12	-2.19	0.0141	288	0.88	0.986	17642	1
RLIM	-10.89	12	-2.19	0.0142	289	0.883	0.986	17641	1
PPA1	-10.87	12	-2.19	0.0143	290	0.886	0.986	17640	1
UGCG	-10.85	12	-2.18	0.0145	291	0.894	0.985	17639	1
RNF8	-10.84	12	-2.18	0.0146	292	0.895	0.985	17638	1
RNPS1	-10.83	12	-2.18	0.0147	293	0.895	0.985	17637	1
BHLHE22	-10.83	12	-2.18	0.0147	294	0.895	0.985	17636	1
TULP3	-10.82	12	-2.18	0.0147	295	0.896	0.985	17635	1
DLGAP5	-10.81	12	-2.17	0.0148	296	0.898	0.985	17634	1
UNKL	-10.79	12	-2.17	0.015	297	0.906	0.985	17633	1
CDS2	-10.75	12	-2.16	0.0153	298	0.908	0.985	17632	1
TLK2	-10.75	12	-2.16	0.0153	299	0.908	0.985	17631	1
CENPW	-10.29	11	-2.16	0.0154	300	0.908	0.985	17630	1
GSDMC	-10.73	12	-2.16	0.0155	301	0.908	0.984	17629	1
TSC2	-10.73	12	-2.16	0.0155	302	0.908	0.984	17628	1
CABIN1	-10.72	12	-2.16	0.0156	303	0.908	0.984	17627	1
TNIP1	-10.72	12	-2.15	0.0156	304	0.908	0.984	17626	1
ZNF703	-10.72	12	-2.15	0.0156	305	0.908	0.984	17625	1
RPRD2	-10.71	12	-2.15	0.0156	306	0.908	0.984	17624	1
PPP1R3D	-10.7	12	-2.15	0.0157	307	0.908	0.984	17623	1
ALG1	-10.7	12	-2.15	0.0158	308	0.908	0.984	17622	1
FIBP	-10.69	12	-2.15	0.0159	309	0.908	0.984	17621	1
SPIRE1	-10.69	12	-2.15	0.0159	310	0.908	0.984	17620	1
VDAC1	-10.68	12	-2.15	0.016	311	0.908	0.984	17619	1
NKIRAS2	-10.68	12	-2.14	0.016	312	0.908	0.984	17618	1
TNFAIP3	-10.68	12	-2.14	0.016	313	0.908	0.984	17617	1
SUPT16H	-10.22	11	-2.14	0.016	314	0.908	0.984	17616	1
STAC3	-10.67	12	-2.14	0.0161	315	0.908	0.984	17615	1
XRCC5	-10.66	12	-2.14	0.0161	316	0.908	0.984	17614	1
CLSPN	-10.66	12	-2.14	0.0161	317	0.908	0.984	17613	1
INTS12	-10.66	12	-2.14	0.0161	318	0.908	0.984	17612	1
BORA	-10.2	11	-2.14	0.0162	319	0.908	0.984	17611	1
ZNF217	-10.64	12	-2.14	0.0163	320	0.911	0.984	17610	1
FAM96B	-10.64	12	-2.14	0.0163	321	0.911	0.984	17609	1
RFT1	-10.63	12	-2.14	0.0164	322	0.911	0.984	17608	1
SPPL3	-10.62	12	-2.13	0.0165	323	0.914	0.984	17607	1
ZMYM4	-10.61	12	-2.13	0.0165	324	0.915	0.983	17606	1
EMC4	-10.59	12	-2.13	0.0167	325	0.921	0.983	17605	1
CDT1	-10.59	12	-2.13	0.0168	326	0.921	0.983	17604	1
DIS3L2	-10.58	12	-2.12	0.0169	327	0.921	0.983	17603	1
FBXO34	-10.57	12	-2.12	0.0169	328	0.921	0.983	17602	1
WDR7	-10.57	12	-2.12	0.0169	329	0.921	0.983	17601	1
RAD1	-10.56	12	-2.12	0.017	330	0.921	0.983	17600	1
TRIT1	-10.56	12	-2.12	0.017	331	0.921	0.983	17599	1
BPIFB3	-10.55	12	-2.12	0.0171	332	0.923	0.983	17598	1
RABL6	-10.55	12	-2.12	0.0171	333	0.923	0.983	17597	1
DCT	-10.54	12	-2.11	0.0172	334	0.923	0.983	17596	1
USP9X	-10.54	12	-2.11	0.0172	335	0.923	0.983	17595	1
C20orf144	-9.11	9	-2.11	0.0174	336	0.926	0.983	17594	1
TMEM30A	-10.51	12	-2.11	0.0175	337	0.933	0.982	17593	1
RBM6	-10.5	12	-2.11	0.0176	338	0.933	0.982	17592	1
MYCBP	-10.49	12	-2.1	0.0177	339	0.936	0.982	17591	1
FLYWCH2	-10.48	12	-2.1	0.0178	340	0.936	0.982	17590	1
UBA3	-10.47	12	-2.1	0.0178	341	0.936	0.982	17589	1
ZDHHC20	-10.47	12	-2.1	0.0178	342	0.936	0.982	17588	1
HAUS6	-10.46	12	-2.1	0.018	343	0.938	0.982	17587	1
GAL3ST4	-10.46	12	-2.1	0.018	344	0.938	0.982	17586	1
TIMM10	-10.42	12	-2.09	0.0183	345	0.949	0.982	17585	1
CCDC174	-10.42	12	-2.09	0.0183	346	0.949	0.982	17584	1
PTK7	-10.41	12	-2.09	0.0184	347	0.953	0.982	17583	1
ANAPC2	-10.41	12	-2.09	0.0185	348	0.953	0.982	17582	1
MAX	-10.39	12	-2.08	0.0186	349	0.957	0.981	17581	1
LSM6	-8.99	9	-2.08	0.0188	350	0.961	0.981	17580	1
IGSF6	-10.36	12	-2.08	0.0189	351	0.961	0.981	17579	1
FAM160A2	-10.36	12	-2.08	0.0189	352	0.961	0.981	17578	1
UBE2L3	-10.34	12	-2.07	0.0191	353	0.961	0.981	17577	1
E2F8	-10.33	12	-2.07	0.0192	354	0.961	0.981	17576	1
CCDC154	-10.32	12	-2.07	0.0193	355	0.961	0.981	17575	1
DYNC2H1	-10.32	12	-2.07	0.0194	356	0.961	0.981	17574	1
MS4A6A	-10.32	12	-2.07	0.0194	357	0.961	0.981	17573	1
TOMM34	-10.31	12	-2.07	0.0194	358	0.961	0.981	17572	1
RBMXL3	-9.4	10	-2.06	0.0196	359	0.961	0.98	17571	1
SLC2A5	-10.29	12	-2.06	0.0197	360	0.961	0.98	17570	1
FOXK2	-10.29	12	-2.06	0.0197	361	0.961	0.98	17569	1
NFATC2IP	-10.28	12	-2.06	0.0198	362	0.961	0.98	17568	1
CCDC146	-10.26	12	-2.06	0.0199	363	0.961	0.98	17567	1
KIAA1429	-10.26	12	-2.05	0.02	364	0.961	0.98	17566	1
TP53	-10.26	12	-2.05	0.02	365	0.961	0.98	17565	1
LMNB1	-10.25	12	-2.05	0.0201	366	0.961	0.98	17564	1
BIRC6	-10.25	12	-2.05	0.0201	367	0.961	0.98	17563	1
RBM17	-10.25	12	-2.05	0.0201	368	0.961	0.98	17562	1
ZSWIM7	-10.25	12	-2.05	0.0201	369	0.961	0.98	17561	1
VTA1	-10.24	12	-2.05	0.0202	370	0.961	0.98	17560	1
FOXS1	-10.23	12	-2.05	0.0203	371	0.961	0.98	17559	1
HELQ	-10.23	12	-2.05	0.0203	372	0.961	0.98	17558	1
RAD9A	-10.22	12	-2.05	0.0204	373	0.961	0.98	17557	1
SHFM1	-10.2	12	-2.04	0.0206	374	0.961	0.979	17556	1
GSG2	-10.19	12	-2.04	0.0207	375	0.961	0.979	17555	1
STRADA	-10.18	12	-2.04	0.0208	376	0.961	0.979	17554	1
GPALPP1	-10.15	12	-2.03	0.0211	377	0.961	0.979	17553	1
COL1A1	-10.15	12	-2.03	0.0212	378	0.961	0.979	17552	1
C2CD5	-10.14	12	-2.03	0.0213	379	0.961	0.979	17551	1
ANAPC5	-10.14	12	-2.03	0.0213	380	0.961	0.979	17550	1
RAD51AP1	-10.13	12	-2.03	0.0214	381	0.961	0.979	17549	1
ATP6V1A	-10.13	12	-2.02	0.0214	382	0.961	0.979	17548	1
ATP6V0C	-10.11	12	-2.02	0.0216	383	0.961	0.978	17547	1
IVL	-10.1	12	-2.02	0.0218	384	0.961	0.978	17546	1
ARHGAP39	-10.07	12	-2.01	0.0221	385	0.961	0.978	17545	0.999
HELZ	-10.07	12	-2.01	0.0221	386	0.961	0.978	17544	0.999
ZNF595	-5.03	3	-2.01	0.0222	387	0.961	0.978	17543	0.999
FAM46C	-10.05	12	-2.01	0.0223	388	0.961	0.978	17542	0.999
ADIPOR2	-10.05	12	-2.01	0.0223	389	0.961	0.978	17541	0.999
MYH7B	-10.05	12	-2.01	0.0223	390	0.961	0.978	17540	0.999
ATP7B	-10.03	12	-2	0.0225	391	0.961	0.977	17539	0.999
CCNF	-8.67	9	-2	0.0227	392	0.961	0.977	17538	0.999
ITPRIPL2	-10	12	-2	0.0229	393	0.961	0.977	17537	0.999
GON4L	-10	12	-2	0.0229	394	0.961	0.977	17536	0.999
POLA2	-9.99	12	-2	0.023	395	0.961	0.977	17535	0.999
NDUFS3	-9.99	12	-2	0.023	396	0.961	0.977	17534	0.999
ROM1	-9.98	12	-1.99	0.0231	397	0.961	0.977	17533	0.999
U2AF1	-9.97	12	-1.99	0.0232	398	0.961	0.977	17532	0.999
TMCO6	-9.55	11	-1.99	0.0232	399	0.961	0.977	17531	0.999
CNOT8	-9.97	12	-1.99	0.0233	400	0.961	0.977	17530	0.999
CDKN2AIP	-9.96	12	-1.99	0.0234	401	0.961	0.977	17529	0.999
LBP	-9.94	12	-1.98	0.0236	402	0.961	0.976	17528	0.999
WDR92	-9.94	12	-1.98	0.0236	403	0.961	0.976	17527	0.999
ATR	-9.93	12	-1.98	0.0237	404	0.961	0.976	17526	0.999
H2AFX	-9.93	12	-1.98	0.0238	405	0.961	0.976	17525	0.999
GPAT2	-9.92	12	-1.98	0.0239	406	0.961	0.976	17524	0.999
ING1	-9.9	12	-1.98	0.0241	407	0.961	0.976	17523	0.998
NDUFS2	-9.89	12	-1.97	0.0242	408	0.961	0.976	17522	0.998
MCPH1	-9.89	12	-1.97	0.0242	409	0.961	0.976	17521	0.998
NDUFS1	-9.89	12	-1.97	0.0242	410	0.961	0.976	17520	0.998
CHRNA4	-9.88	12	-1.97	0.0243	411	0.961	0.976	17519	0.998
MMP19	-9.87	12	-1.97	0.0244	412	0.961	0.976	17518	0.998
PPP1R2	-9.87	12	-1.97	0.0245	413	0.961	0.976	17517	0.998
FLT1	-9.84	12	-1.96	0.0248	414	0.961	0.975	17516	0.998
PRRG4	-9.84	12	-1.96	0.0249	415	0.961	0.975	17515	0.998
PCDHGA10	-9.83	12	-1.96	0.025	416	0.961	0.975	17514	0.998
WFDC13	-9.81	12	-1.96	0.0252	417	0.961	0.975	17513	0.998
SEC24A	-9.79	12	-1.95	0.0255	418	0.961	0.975	17512	0.998
CYB561A3	-9.79	12	-1.95	0.0255	419	0.961	0.974	17511	0.998
HSPA14	-9.77	12	-1.95	0.0257	420	0.961	0.974	17510	0.998
DNAJC2	-9.76	12	-1.95	0.0258	421	0.961	0.974	17509	0.998
XKR7	-9.76	12	-1.95	0.0258	422	0.961	0.974	17508	0.998
TM7SF2	-9.76	12	-1.95	0.0259	423	0.961	0.974	17507	0.998
GPHN	-9.75	12	-1.94	0.0259	424	0.961	0.974	17506	0.998
PPHLN1	-9.75	12	-1.94	0.026	425	0.961	0.974	17505	0.998
C17orf70	-9.73	12	-1.94	0.0263	426	0.961	0.974	17504	0.997
BRE	-9.73	12	-1.94	0.0263	427	0.961	0.974	17503	0.997
C2CD4A	-9.72	12	-1.94	0.0264	428	0.961	0.974	17502	0.997
PCDH17	-9.72	12	-1.94	0.0264	429	0.961	0.974	17501	0.997
PTRH2	-9.72	12	-1.94	0.0264	430	0.961	0.974	17500	0.997
C20orf24	-9.72	12	-1.94	0.0264	431	0.961	0.974	17499	0.997
FDX1L	-9.71	12	-1.93	0.0266	432	0.961	0.973	17498	0.997
MCTP1	-9.71	12	-1.93	0.0266	433	0.961	0.973	17497	0.997
CTCF	-9.7	12	-1.93	0.0266	434	0.961	0.973	17496	0.997
DNAI2	-9.69	12	-1.93	0.0268	435	0.961	0.973	17495	0.997
VEGFB	-9.69	12	-1.93	0.0268	436	0.961	0.973	17494	0.997
DPCR1	-9.69	12	-1.93	0.0268	437	0.961	0.973	17493	0.997
ARFGAP1	-9.68	12	-1.93	0.0269	438	0.961	0.973	17492	0.997
SLU7	-9.68	12	-1.93	0.0269	439	0.961	0.973	17491	0.997
STT3B	-9.68	12	-1.93	0.0269	440	0.961	0.973	17490	0.997
RBCK1	-9.68	12	-1.93	0.0269	441	0.961	0.973	17489	0.997
PKP1	-9.68	12	-1.93	0.027	442	0.961	0.973	17488	0.997
TRIM37	-9.68	12	-1.93	0.027	443	0.961	0.973	17487	0.997
ARMC5	-9.68	12	-1.93	0.027	444	0.961	0.973	17486	0.997
NPAS2	-9.67	12	-1.93	0.0271	445	0.961	0.973	17485	0.997
COL9A3	-9.67	12	-1.92	0.0271	446	0.961	0.973	17484	0.997
WDR83	-9.66	12	-1.92	0.0272	447	0.961	0.973	17483	0.997
MYL6B	-9.66	12	-1.92	0.0272	448	0.961	0.973	17482	0.997
HECTD1	-9.66	12	-1.92	0.0273	449	0.961	0.973	17481	0.997
GPR101	-9.65	12	-1.92	0.0274	450	0.961	0.973	17480	0.997
CD8A	-9.64	12	-1.92	0.0274	451	0.961	0.973	17479	0.997
LUC7L3	-9.64	12	-1.92	0.0275	452	0.961	0.972	17478	0.997
GYS2	-9.63	12	-1.92	0.0276	453	0.961	0.972	17477	0.997
TICRR	-9.63	12	-1.92	0.0277	454	0.961	0.972	17476	0.997
ADAM10	-9.62	12	-1.92	0.0277	455	0.961	0.972	17475	0.997
NTSR1	-9.62	12	-1.92	0.0277	456	0.961	0.972	17474	0.997
FLNB	-9.62	12	-1.91	0.0278	457	0.961	0.972	17473	0.997
TNPO3	-9.62	12	-1.91	0.0278	458	0.961	0.972	17472	0.997
NAA38	-9.62	12	-1.91	0.0278	459	0.961	0.972	17471	0.997
SKP2	-9.61	12	-1.91	0.0279	460	0.961	0.972	17470	0.997
MCM3	-9.61	12	-1.91	0.0279	461	0.961	0.972	17469	0.997
PLCZ1	-9.6	12	-1.91	0.028	462	0.961	0.972	17468	0.997
SLC20A1	-9.6	12	-1.91	0.028	463	0.961	0.972	17467	0.997
C16orf54	-9.6	12	-1.91	0.0281	464	0.961	0.972	17466	0.997
PSMA3	-9.19	11	-1.91	0.0281	465	0.961	0.972	17465	0.997
SLC35A2	-9.59	12	-1.91	0.0281	466	0.961	0.972	17464	0.997
CENPQ	-8.75	10	-1.91	0.0282	467	0.961	0.972	17463	0.997
CPSF3L	-9.57	12	-1.9	0.0284	468	0.961	0.972	17462	0.997
C5orf52	-9.54	12	-1.9	0.0289	469	0.961	0.971	17461	0.997
CENPF	-9.52	12	-1.89	0.0292	470	0.961	0.971	17460	0.997
DNAJC17	-9.52	12	-1.89	0.0292	471	0.961	0.971	17459	0.997
MTCH1	-9.51	12	-1.89	0.0293	472	0.961	0.971	17458	0.997
PYDC1	-9.51	12	-1.89	0.0294	473	0.961	0.971	17457	0.997
ZNF517	-9.51	12	-1.89	0.0294	474	0.961	0.971	17456	0.997
NAA60	-9.49	12	-1.89	0.0296	475	0.961	0.97	17455	0.997
AP3M2	-9.48	12	-1.88	0.0298	476	0.961	0.97	17454	0.997
HDGFRP3	-9.47	12	-1.88	0.0299	477	0.961	0.97	17453	0.997
IGSF1	-9.47	12	-1.88	0.03	478	0.961	0.97	17452	0.997
KREMEN2	-9.46	12	-1.88	0.0301	479	0.961	0.97	17451	0.997
DDX4	-9.45	12	-1.88	0.0302	480	0.961	0.97	17450	0.996
VCP	-9.45	12	-1.88	0.0302	481	0.961	0.97	17449	0.996
PROSC	-9.45	12	-1.88	0.0302	482	0.961	0.97	17448	0.996
MAGT1	-9.45	12	-1.88	0.0302	483	0.961	0.97	17447	0.996
CDK8	-9.44	12	-1.88	0.0303	484	0.961	0.97	17446	0.996
TIMELESS	-9.44	12	-1.88	0.0304	485	0.961	0.97	17445	0.996
IPO8	-9.44	12	-1.88	0.0304	486	0.961	0.97	17444	0.996
NAA50	-9.42	12	-1.87	0.0307	487	0.961	0.969	17443	0.996
SNRK	-9.41	12	-1.87	0.0308	488	0.961	0.969	17442	0.996
ZNF7	-9.4	12	-1.87	0.031	489	0.961	0.969	17441	0.996
BPIFA1	-9.39	12	-1.87	0.0311	490	0.961	0.969	17440	0.996
CCDC71L	-9.39	12	-1.86	0.0312	491	0.961	0.969	17439	0.996
CAB39	-9.38	12	-1.86	0.0312	492	0.961	0.969	17438	0.996
FGF17	-9.38	12	-1.86	0.0313	493	0.961	0.969	17437	0.996
GGPS1	-9.38	12	-1.86	0.0313	494	0.961	0.969	17436	0.996
TMEM5	-9.37	12	-1.86	0.0315	495	0.961	0.968	17435	0.996
CENPO	-9.36	12	-1.86	0.0315	496	0.961	0.968	17434	0.996
CNOT2	-9.36	12	-1.86	0.0315	497	0.961	0.968	17433	0.996
OXT	-9.35	12	-1.86	0.0317	498	0.961	0.968	17432	0.996
RNASEH2C	-9.35	12	-1.86	0.0317	499	0.961	0.968	17431	0.996
N4BP2L1	-9.35	12	-1.85	0.0318	500	0.961	0.968	17430	0.996
EMC6	-9.34	12	-1.85	0.0318	501	0.961	0.968	17429	0.996
GATAD1	-9.33	12	-1.85	0.0321	502	0.961	0.968	17428	0.996
FIGLA	-9.32	12	-1.85	0.0322	503	0.961	0.968	17427	0.996
ATP6V1D	-9.31	12	-1.85	0.0324	504	0.961	0.968	17426	0.996
GLI1	-9.3	12	-1.85	0.0325	505	0.961	0.967	17425	0.995
ATG12	-9.3	12	-1.84	0.0325	506	0.961	0.967	17424	0.995
INTS8	-9.3	12	-1.84	0.0326	507	0.961	0.967	17423	0.995
CCDC125	-9.29	12	-1.84	0.0326	508	0.961	0.967	17422	0.995
TRAPPC2L	-9.29	12	-1.84	0.0327	509	0.961	0.967	17421	0.995
EDC3	-9.27	12	-1.84	0.0329	510	0.961	0.967	17420	0.995
HFE2	-9.26	12	-1.84	0.0331	511	0.961	0.967	17419	0.995
DAAM2	-9.26	12	-1.84	0.0331	512	0.961	0.967	17418	0.995
C21orf59	-9.26	12	-1.84	0.0331	513	0.961	0.967	17417	0.995
TIMM50	-9.26	12	-1.84	0.0332	514	0.961	0.967	17416	0.995
SCO2	-9.25	12	-1.83	0.0333	515	0.961	0.967	17415	0.995
PCMTD2	-9.25	12	-1.83	0.0334	516	0.961	0.967	17414	0.995
NUGGC	-9.25	12	-1.83	0.0334	517	0.961	0.967	17413	0.995
TRIM39	-9.25	12	-1.83	0.0334	518	0.961	0.967	17412	0.995
CCDC84	-9.24	12	-1.83	0.0335	519	0.961	0.967	17411	0.995
RARRES3	-9.24	12	-1.83	0.0335	520	0.961	0.966	17410	0.995
TMEM261	-9.23	12	-1.83	0.0337	521	0.961	0.966	17409	0.995
VPS54	-9.22	12	-1.83	0.0338	522	0.961	0.966	17408	0.995
NUBPL	-9.19	12	-1.82	0.0342	523	0.961	0.966	17407	0.995
ANP32E	-9.19	12	-1.82	0.0343	524	0.961	0.966	17406	0.995
KLHDC10	-9.19	12	-1.82	0.0344	525	0.961	0.966	17405	0.995
C7orf49	-9.17	12	-1.82	0.0346	526	0.961	0.965	17404	0.995
HIST1H2AE	-9.17	12	-1.82	0.0347	527	0.961	0.965	17403	0.994
LRWD1	-9.16	12	-1.81	0.0348	528	0.961	0.965	17402	0.994
DNASE1	-9.15	12	-1.81	0.0349	529	0.961	0.965	17401	0.994
FAT2	-9.15	12	-1.81	0.035	530	0.961	0.965	17400	0.994
TCEB3	-9.15	12	-1.81	0.035	531	0.961	0.965	17399	0.994
RIF1	-9.12	12	-1.81	0.0355	532	0.961	0.964	17398	0.994
USP14	-9.11	12	-1.8	0.0356	533	0.961	0.964	17397	0.994
L3MBTL4	-9.1	12	-1.8	0.0358	534	0.961	0.964	17396	0.994
SETX	-9.1	12	-1.8	0.0358	535	0.961	0.964	17395	0.994
C11orf84	-9.1	12	-1.8	0.0359	536	0.961	0.964	17394	0.994
FAM172A	-9.1	12	-1.8	0.0359	537	0.961	0.964	17393	0.994
TRIM72	-9.1	12	-1.8	0.0359	538	0.961	0.964	17392	0.994
USP12	-9.1	12	-1.8	0.0359	539	0.961	0.964	17391	0.994
STIP1	-9.09	12	-1.8	0.036	540	0.961	0.964	17390	0.994
CAMK2A	-9.09	12	-1.8	0.036	541	0.961	0.964	17389	0.994
SLC6A5	-9.09	12	-1.8	0.036	542	0.961	0.964	17388	0.994
FNBP1L	-9.08	12	-1.8	0.0362	543	0.961	0.964	17387	0.994
DGCR8	-9.07	12	-1.8	0.0363	544	0.961	0.964	17386	0.994
TMEM123	-9.07	12	-1.79	0.0364	545	0.961	0.964	17385	0.994
FBXO16	-9.07	12	-1.79	0.0364	546	0.961	0.964	17384	0.994
USP8	-9.06	12	-1.79	0.0365	547	0.961	0.964	17383	0.994
MEIS1	-9.06	12	-1.79	0.0366	548	0.961	0.963	17382	0.994
MGAT1	-9.05	12	-1.79	0.0367	549	0.961	0.963	17381	0.994
RBFA	-9.04	12	-1.79	0.037	550	0.961	0.963	17380	0.993
HOXC6	-9.03	12	-1.79	0.037	551	0.961	0.963	17379	0.993
POF1B	-9.03	12	-1.79	0.037	552	0.961	0.963	17378	0.993
ARPC1B	-9.03	12	-1.79	0.0371	553	0.961	0.963	17377	0.993
C11orf57	-9.03	12	-1.79	0.0371	554	0.961	0.963	17376	0.993
KIAA0556	-9.01	12	-1.78	0.0374	555	0.961	0.963	17375	0.993
PHKG2	-9.01	12	-1.78	0.0374	556	0.961	0.963	17374	0.993
CA7	-9.01	12	-1.78	0.0374	557	0.961	0.963	17373	0.993
CCDC70	-9.01	12	-1.78	0.0374	558	0.961	0.963	17372	0.993
ACSM2A	-6.35	6	-1.78	0.0378	559	0.961	0.962	17371	0.993
ERLIN2	-8.99	12	-1.78	0.0378	560	0.961	0.962	17370	0.993
MTHFSD	-8.98	12	-1.78	0.0379	561	0.961	0.962	17369	0.993
KCNB1	-8.98	12	-1.77	0.038	562	0.961	0.962	17368	0.993
HMGN5	-7.77	9	-1.77	0.038	563	0.961	0.962	17367	0.993
PRRC2C	-8.98	12	-1.77	0.038	564	0.961	0.962	17366	0.993
DHX29	-8.98	12	-1.77	0.038	565	0.961	0.962	17365	0.993
MPC1	-8.97	12	-1.77	0.0381	566	0.961	0.962	17364	0.993
MAPK8IP3	-8.97	12	-1.77	0.0382	567	0.961	0.962	17363	0.993
TRIM54	-8.96	12	-1.77	0.0382	568	0.961	0.962	17362	0.993
TP73	-8.95	12	-1.77	0.0385	569	0.961	0.961	17361	0.993
IL1R2	-8.95	12	-1.77	0.0385	570	0.961	0.961	17360	0.993
NELFCD	-8.94	12	-1.77	0.0386	571	0.961	0.961	17359	0.993
HMGCS1	-8.94	12	-1.77	0.0387	572	0.961	0.961	17358	0.993
MRPL13	-8.93	12	-1.77	0.0388	573	0.961	0.961	17357	0.993
CCND3	-8.93	12	-1.76	0.0388	574	0.961	0.961	17356	0.993
PPP2R4	-8.93	12	-1.76	0.0389	575	0.961	0.961	17355	0.993
MNX1	-8.92	12	-1.76	0.0389	576	0.961	0.961	17354	0.993
LRRC3B	-8.14	10	-1.76	0.039	577	0.961	0.961	17353	0.993
STC2	-8.92	12	-1.76	0.0391	578	0.961	0.961	17352	0.993
C20orf166	-8.91	12	-1.76	0.0392	579	0.961	0.961	17351	0.993
FBXO33	-8.89	12	-1.76	0.0395	580	0.961	0.96	17350	0.993
POU3F3	-8.89	12	-1.76	0.0395	581	0.961	0.96	17349	0.993
FERMT3	-8.89	12	-1.76	0.0395	582	0.961	0.96	17348	0.993
SLC25A43	-8.51	11	-1.76	0.0396	583	0.961	0.96	17347	0.993
ZFP42	-8.89	12	-1.75	0.0397	584	0.961	0.96	17346	0.993
GMNN	-8.88	12	-1.75	0.0397	585	0.961	0.96	17345	0.993
WNT8A	-8.88	12	-1.75	0.0398	586	0.961	0.96	17344	0.993
SCNM1	-8.88	12	-1.75	0.0399	587	0.961	0.96	17343	0.993
TCEA1	-8.87	12	-1.75	0.0399	588	0.961	0.96	17342	0.993
COX11	-8.87	12	-1.75	0.0399	589	0.961	0.96	17341	0.993
NDUFB10	-8.87	12	-1.75	0.04	590	0.961	0.96	17340	0.993
CDK6	-8.87	12	-1.75	0.04	591	0.961	0.96	17339	0.993
ESX1	-8.86	12	-1.75	0.0402	592	0.961	0.96	17338	0.992
MYL6	-8.85	12	-1.75	0.0403	593	0.961	0.96	17337	0.992
SPTLC2	-8.85	12	-1.75	0.0403	594	0.961	0.96	17336	0.992
KIF3B	-8.85	12	-1.75	0.0404	595	0.961	0.96	17335	0.992
STX1B	-8.85	12	-1.75	0.0404	596	0.961	0.96	17334	0.992
UMOD	-8.84	12	-1.75	0.0405	597	0.961	0.96	17333	0.992
SEMA4F	-8.84	12	-1.75	0.0405	598	0.961	0.96	17332	0.992
MYH9	-8.84	12	-1.75	0.0405	599	0.961	0.96	17331	0.992
SDS	-8.83	12	-1.74	0.0407	600	0.961	0.959	17330	0.992
CUL2	-8.83	12	-1.74	0.0407	601	0.961	0.959	17329	0.992
METTL3	-8.83	12	-1.74	0.0407	602	0.961	0.959	17328	0.992
PELI3	-8.83	12	-1.74	0.0407	603	0.961	0.959	17327	0.992
MRPL28	-8.82	12	-1.74	0.0409	604	0.961	0.959	17326	0.992
CREBZF	-8.81	12	-1.74	0.0411	605	0.961	0.959	17325	0.992
LCP1	-8.81	12	-1.74	0.0411	606	0.961	0.959	17324	0.992
CLNS1A	-8.43	11	-1.74	0.0412	607	0.961	0.959	17323	0.992
ABHD16B	-8.8	12	-1.74	0.0413	608	0.961	0.959	17322	0.992
GTF3C2	-8.8	12	-1.74	0.0413	609	0.961	0.959	17321	0.992
ZNF511	-8.79	12	-1.73	0.0414	610	0.961	0.959	17320	0.992
EXTL3	-8.79	12	-1.73	0.0416	611	0.961	0.958	17319	0.992
SCAF4	-8.78	12	-1.73	0.0416	612	0.961	0.958	17318	0.992
CRYL1	-8.78	12	-1.73	0.0417	613	0.961	0.958	17317	0.992
SLC1A1	-8.78	12	-1.73	0.0418	614	0.961	0.958	17316	0.992
OR56B1	-8.77	12	-1.73	0.0418	615	0.961	0.958	17315	0.992
SYVN1	-8.77	12	-1.73	0.0418	616	0.961	0.958	17314	0.992
CDK5RAP1	-8.77	12	-1.73	0.0419	617	0.961	0.958	17313	0.992
GLYAT	-8.77	12	-1.73	0.042	618	0.961	0.958	17312	0.992
MRPS35	-8.76	12	-1.73	0.042	619	0.961	0.958	17311	0.992
PRIM1	-8.76	12	-1.73	0.042	620	0.961	0.958	17310	0.992
PRPF19	-8.76	12	-1.73	0.0421	621	0.961	0.958	17309	0.992
NF2	-8.76	12	-1.73	0.0421	622	0.961	0.958	17308	0.992
HAO1	-8.75	12	-1.72	0.0423	623	0.961	0.958	17307	0.992
GLYR1	-8.75	12	-1.72	0.0423	624	0.961	0.958	17306	0.992
GSG1	-8.75	12	-1.72	0.0424	625	0.961	0.958	17305	0.992
TLR8	-8.74	12	-1.72	0.0424	626	0.961	0.958	17304	0.992
SKP1	-7.56	9	-1.72	0.0426	627	0.961	0.957	17303	0.992
MED15	-8.73	12	-1.72	0.0426	628	0.961	0.957	17302	0.992
UNCX	-8.73	12	-1.72	0.0427	629	0.961	0.957	17301	0.992
AXIN1	-8.73	12	-1.72	0.0427	630	0.961	0.957	17300	0.992
KCTD13	-8.72	12	-1.72	0.0429	631	0.961	0.957	17299	0.992
COX5B	-8.71	12	-1.72	0.043	632	0.961	0.957	17298	0.992
ZNF512	-8.71	12	-1.72	0.0431	633	0.961	0.957	17297	0.992
IL1RN	-8.71	12	-1.72	0.0432	634	0.961	0.957	17296	0.992
RALGDS	-8.7	12	-1.71	0.0432	635	0.961	0.957	17295	0.992
EGR4	-8.7	12	-1.71	0.0432	636	0.961	0.957	17294	0.992
ARPP19	-8.7	12	-1.71	0.0433	637	0.961	0.957	17293	0.992
KIF2A	-8.69	12	-1.71	0.0434	638	0.961	0.957	17292	0.992
FHL3	-8.69	12	-1.71	0.0435	639	0.961	0.957	17291	0.992
ALPK2	-8.69	12	-1.71	0.0435	640	0.961	0.957	17290	0.992
LRCH4	-8.69	12	-1.71	0.0436	641	0.961	0.956	17289	0.992
FASTKD5	-8.68	12	-1.71	0.0436	642	0.961	0.956	17288	0.992
UBE2F	-8.68	12	-1.71	0.0438	643	0.961	0.956	17287	0.992
PDIA6	-8.67	12	-1.71	0.0439	644	0.961	0.956	17286	0.992
FAM71E1	-8.67	12	-1.71	0.0439	645	0.961	0.956	17285	0.992
HSD17B10	-8.66	12	-1.7	0.0441	646	0.961	0.956	17284	0.992
MRPL21	-8.65	12	-1.7	0.0443	647	0.961	0.956	17283	0.991
MAP2K1	-8.65	12	-1.7	0.0443	648	0.961	0.956	17282	0.991
EIF2AK3	-8.65	12	-1.7	0.0443	649	0.961	0.956	17281	0.991
DDX42	-8.65	12	-1.7	0.0444	650	0.961	0.956	17280	0.991
NIPAL3	-8.63	12	-1.7	0.0446	651	0.961	0.955	17279	0.991
SNTB1	-8.63	12	-1.7	0.0447	652	0.961	0.955	17278	0.991
CCNC	-8.63	12	-1.7	0.0447	653	0.961	0.955	17277	0.991
WARS2	-8.63	12	-1.7	0.0448	654	0.961	0.955	17276	0.991
CNOT7	-8.62	12	-1.7	0.0448	655	0.961	0.955	17275	0.991
FANCD2OS	-8.6	12	-1.69	0.0452	656	0.961	0.955	17274	0.991
LOXL1	-7.45	9	-1.69	0.0453	657	0.961	0.955	17273	0.991
ZNF318	-8.6	12	-1.69	0.0453	658	0.961	0.955	17272	0.991
LHFPL2	-8.6	12	-1.69	0.0454	659	0.961	0.955	17271	0.991
HIST1H1C	-8.58	12	-1.69	0.0457	660	0.961	0.954	17270	0.991
TECPR2	-8.58	12	-1.69	0.0457	661	0.961	0.954	17269	0.991
PPIL2	-8.58	12	-1.69	0.0458	662	0.961	0.954	17268	0.991
ISCA2	-8.57	12	-1.69	0.046	663	0.961	0.954	17267	0.991
SLC25A45	-8.57	12	-1.69	0.046	664	0.961	0.954	17266	0.991
FBXO41	-8.57	12	-1.68	0.046	665	0.961	0.954	17265	0.991
C16orf45	-8.55	12	-1.68	0.0463	666	0.961	0.954	17264	0.99
STX4	-8.55	12	-1.68	0.0463	667	0.961	0.954	17263	0.99
PRDM14	-8.55	12	-1.68	0.0464	668	0.961	0.954	17262	0.99
USP39	-8.54	12	-1.68	0.0465	669	0.961	0.954	17261	0.99
TSPAN17	-8.54	12	-1.68	0.0467	670	0.961	0.953	17260	0.99
ODF3	-8.53	12	-1.68	0.0467	671	0.961	0.953	17259	0.99
PDRG1	-8.53	12	-1.68	0.0468	672	0.961	0.953	17258	0.99
SSSCA1	-8.53	12	-1.68	0.0469	673	0.961	0.953	17257	0.99
PRKAG1	-8.52	12	-1.67	0.047	674	0.961	0.953	17256	0.99
PLAC8L1	-8.51	12	-1.67	0.0471	675	0.961	0.953	17255	0.99
ZSCAN10	-8.51	12	-1.67	0.0472	676	0.961	0.953	17254	0.99
BRD7	-8.51	12	-1.67	0.0472	677	0.961	0.953	17253	0.99
GSX1	-8.51	12	-1.67	0.0472	678	0.961	0.953	17252	0.99
TOPBP1	-8.51	12	-1.67	0.0473	679	0.961	0.953	17251	0.99
PIK3R1	-8.5	12	-1.67	0.0475	680	0.961	0.953	17250	0.99
LIMD1	-8.5	12	-1.67	0.0475	681	0.961	0.953	17249	0.99
GSTA4	-8.49	12	-1.67	0.0475	682	0.961	0.952	17248	0.99
USP5	-8.49	12	-1.67	0.0477	683	0.961	0.952	17247	0.99
PAQR6	-8.48	12	-1.67	0.0478	684	0.961	0.952	17246	0.99
TELO2	-8.47	12	-1.67	0.048	685	0.961	0.952	17245	0.99
ERGIC3	-8.47	12	-1.66	0.048	686	0.961	0.952	17244	0.99
C1QTNF8	-8.47	12	-1.66	0.048	687	0.961	0.952	17243	0.99
CANX	-8.47	12	-1.66	0.048	688	0.961	0.952	17242	0.99
MZT1	-5.99	6	-1.66	0.0481	689	0.961	0.952	17241	0.99
SERP2	-8.46	12	-1.66	0.0482	690	0.961	0.952	17240	0.99
ABCC11	-8.45	12	-1.66	0.0484	691	0.961	0.952	17239	0.99
EPSTI1	-8.45	12	-1.66	0.0485	692	0.961	0.951	17238	0.99
ZNF407	-8.45	12	-1.66	0.0485	693	0.961	0.951	17237	0.99
FBXL17	-8.45	12	-1.66	0.0485	694	0.961	0.951	17236	0.99
RBKS	-8.44	12	-1.66	0.0487	695	0.961	0.951	17235	0.99
NR2C2	-8.44	12	-1.66	0.0487	696	0.961	0.951	17234	0.99
COL2A1	-8.44	12	-1.66	0.0488	697	0.961	0.951	17233	0.99
MFSD5	-8.43	12	-1.66	0.0489	698	0.961	0.951	17232	0.99
CCDC27	-8.43	12	-1.65	0.049	699	0.961	0.951	17231	0.99
PTPN1	-8.43	12	-1.65	0.049	700	0.961	0.951	17230	0.99
HAUS3	-8.42	12	-1.65	0.0491	701	0.961	0.951	17229	0.99
QRICH1	-8.42	12	-1.65	0.0491	702	0.961	0.951	17228	0.99
CXorf23	-8.42	12	-1.65	0.0491	703	0.961	0.951	17227	0.99
COX7C	-8.4	12	-1.65	0.0496	704	0.961	0.95	17226	0.989
SLX4IP	-8.4	12	-1.65	0.0497	705	0.961	0.95	17225	0.989
LPCAT3	-7.26	9	-1.65	0.0499	706	0.961	0.95	17224	0.989
OSBPL2	-8.38	12	-1.65	0.05	707	0.961	0.95	17223	0.989
PRM2	-8.37	12	-1.64	0.0504	708	0.961	0.95	17222	0.989
OR4D9	-8.37	12	-1.64	0.0504	709	0.961	0.95	17221	0.989
PDGFA	-8.36	12	-1.64	0.0505	710	0.961	0.949	17220	0.989
SOX3	-8.36	12	-1.64	0.0505	711	0.961	0.949	17219	0.989
FAM160B2	-8.36	12	-1.64	0.0506	712	0.961	0.949	17218	0.989
MED12	-8.35	12	-1.64	0.0506	713	0.961	0.949	17217	0.989
CUL5	-8.35	12	-1.64	0.0507	714	0.961	0.949	17216	0.989
CHD9	-8.34	12	-1.64	0.0509	715	0.961	0.949	17215	0.988
SLC22A11	-8.34	12	-1.64	0.051	716	0.961	0.949	17214	0.988
C17orf99	-8.33	12	-1.63	0.0512	717	0.961	0.949	17213	0.988
SLC9A3R2	-8.33	12	-1.63	0.0513	718	0.961	0.949	17212	0.988
MCM2	-8.33	12	-1.63	0.0513	719	0.961	0.949	17211	0.988
NFKBIL1	-8.32	12	-1.63	0.0513	720	0.961	0.949	17210	0.988
TNN	-8.31	12	-1.63	0.0516	721	0.961	0.948	17209	0.988
PTCHD2	-8.31	12	-1.63	0.0517	722	0.961	0.948	17208	0.988
SOCS3	-8.3	12	-1.63	0.0518	723	0.961	0.948	17207	0.988
TMEM101	-8.3	12	-1.63	0.0518	724	0.961	0.948	17206	0.988
DQX1	-8.29	12	-1.63	0.052	725	0.961	0.948	17205	0.988
CCDC66	-8.29	12	-1.63	0.0521	726	0.961	0.948	17204	0.988
CALU	-8.29	12	-1.62	0.0521	727	0.961	0.948	17203	0.988
HMGCR	-8.29	12	-1.62	0.0521	728	0.961	0.948	17202	0.988
AHCYL2	-8.29	12	-1.62	0.0521	729	0.961	0.948	17201	0.988
ORC3	-8.29	12	-1.62	0.0522	730	0.961	0.948	17200	0.988
RBFOX1	-7.18	9	-1.62	0.0522	731	0.961	0.948	17199	0.988
NDUFB9	-8.28	12	-1.62	0.0523	732	0.961	0.948	17198	0.988
SEZ6L2	-8.28	12	-1.62	0.0523	733	0.961	0.948	17197	0.988
RGS7BP	-8.28	12	-1.62	0.0523	734	0.961	0.948	17196	0.988
C20orf27	-8.28	12	-1.62	0.0523	735	0.961	0.948	17195	0.988
AMZ1	-8.28	12	-1.62	0.0524	736	0.961	0.948	17194	0.988
MAD2L1BP	-8.28	12	-1.62	0.0524	737	0.961	0.948	17193	0.988
GCKR	-8.27	12	-1.62	0.0525	738	0.961	0.947	17192	0.988
DUSP1	-8.27	12	-1.62	0.0525	739	0.961	0.947	17191	0.988
CARS2	-8.27	12	-1.62	0.0526	740	0.961	0.947	17190	0.988
KCNK1	-8.27	12	-1.62	0.0527	741	0.961	0.947	17189	0.988
TK1	-8.27	12	-1.62	0.0527	742	0.961	0.947	17188	0.988
HRNR	-8.27	12	-1.62	0.0527	743	0.961	0.947	17187	0.988
KATNAL1	-8.26	12	-1.62	0.0527	744	0.961	0.947	17186	0.988
ENSA	-8.26	12	-1.62	0.0527	745	0.961	0.947	17185	0.988
IDO2	-8.26	12	-1.62	0.0528	746	0.961	0.947	17184	0.988
CPNE3	-8.26	12	-1.62	0.0528	747	0.961	0.947	17183	0.988
GPRC5D	-8.26	12	-1.62	0.0529	748	0.961	0.947	17182	0.988
KIF21B	-8.25	12	-1.62	0.053	749	0.961	0.947	17181	0.988
NHLH1	-8.25	12	-1.61	0.0532	750	0.961	0.947	17180	0.988
WDHD1	-8.24	12	-1.61	0.0532	751	0.961	0.947	17179	0.988
TSR3	-7.53	10	-1.61	0.0532	752	0.961	0.947	17178	0.988
PENK	-8.24	12	-1.61	0.0533	753	0.961	0.947	17177	0.988
KCMF1	-8.24	12	-1.61	0.0533	754	0.961	0.947	17176	0.988
USP3	-8.24	12	-1.61	0.0533	755	0.961	0.947	17175	0.988
ADCK1	-8.24	12	-1.61	0.0533	756	0.961	0.947	17174	0.988
BTNL9	-8.24	12	-1.61	0.0533	757	0.961	0.947	17173	0.988
ANP32D	-4.12	3	-1.61	0.0534	758	0.961	0.947	17172	0.988
FBXW7	-8.24	12	-1.61	0.0534	759	0.961	0.947	17171	0.988
ZNFX1	-8.24	12	-1.61	0.0534	760	0.961	0.947	17170	0.988
POLQ	-8.23	12	-1.61	0.0535	761	0.961	0.947	17169	0.988
DMTF1	-8.23	12	-1.61	0.0535	762	0.961	0.946	17168	0.988
DARS2	-8.23	12	-1.61	0.0536	763	0.961	0.946	17167	0.988
MRPS31	-8.22	12	-1.61	0.0537	764	0.961	0.946	17166	0.988
ACTL6B	-8.22	12	-1.61	0.0537	765	0.961	0.946	17165	0.988
SLC39A7	-8.22	12	-1.61	0.0537	766	0.961	0.946	17164	0.988
LDLR	-8.22	12	-1.61	0.0538	767	0.961	0.946	17163	0.988
TCEB2	-8.22	12	-1.61	0.0538	768	0.961	0.946	17162	0.988
ZNF620	-8.2	12	-1.61	0.0541	769	0.961	0.946	17161	0.988
UGP2	-8.2	12	-1.61	0.0542	770	0.961	0.946	17160	0.988
HIST1H1B	-8.2	12	-1.6	0.0543	771	0.961	0.946	17159	0.988
PCDHA1	-8.2	12	-1.6	0.0543	772	0.961	0.946	17158	0.988
TRIM13	-8.2	12	-1.6	0.0543	773	0.961	0.946	17157	0.988
GABPA	-8.2	12	-1.6	0.0543	774	0.961	0.946	17156	0.988
ARR3	-8.19	12	-1.6	0.0544	775	0.961	0.946	17155	0.988
GOPC	-8.19	12	-1.6	0.0544	776	0.961	0.946	17154	0.988
AUTS2	-8.19	12	-1.6	0.0544	777	0.961	0.946	17153	0.988
BMP7	-8.19	12	-1.6	0.0545	778	0.961	0.946	17152	0.988
RNF144B	-8.19	12	-1.6	0.0545	779	0.961	0.945	17151	0.988
WDR82	-8.19	12	-1.6	0.0546	780	0.961	0.945	17150	0.988
ANKRD34A	-8.18	12	-1.6	0.0546	781	0.961	0.945	17149	0.988
ZNF12	-8.18	12	-1.6	0.0546	782	0.961	0.945	17148	0.988
TAMM41	-8.18	12	-1.6	0.0547	783	0.961	0.945	17147	0.988
WNT11	-8.17	12	-1.6	0.055	784	0.961	0.945	17146	0.988
NDUFB11	-8.17	12	-1.6	0.055	785	0.961	0.945	17145	0.988
LRRTM4	-8.16	12	-1.6	0.0551	786	0.961	0.945	17144	0.988
HIST1H4G	-8.16	12	-1.6	0.0551	787	0.961	0.945	17143	0.988
ZSCAN22	-8.16	12	-1.6	0.0552	788	0.961	0.945	17142	0.988
VPS25	-8.16	12	-1.6	0.0552	789	0.961	0.945	17141	0.988
DCUN1D5	-8.16	12	-1.6	0.0552	790	0.961	0.945	17140	0.988
CCDC88B	-8.16	12	-1.6	0.0553	791	0.961	0.945	17139	0.988
ITFG2	-8.15	12	-1.59	0.0556	792	0.961	0.944	17138	0.988
HOXA10	-8.14	12	-1.59	0.0557	793	0.961	0.944	17137	0.988
HIST1H1T	-8.13	12	-1.59	0.0559	794	0.961	0.944	17136	0.988
PTPN12	-8.13	12	-1.59	0.056	795	0.961	0.944	17135	0.988
FAM83A	-8.12	12	-1.59	0.0562	796	0.961	0.944	17134	0.988
TMEM150A	-8.12	12	-1.59	0.0563	797	0.961	0.944	17133	0.988
MAP4	-8.11	12	-1.58	0.0565	798	0.961	0.944	17132	0.987
PTPLAD1	-8.1	12	-1.58	0.0566	799	0.961	0.943	17131	0.987
SLC35A1	-8.1	12	-1.58	0.0567	800	0.961	0.943	17130	0.987
GPRIN1	-8.1	12	-1.58	0.0567	801	0.961	0.943	17129	0.987
TDRD3	-8.1	12	-1.58	0.0568	802	0.961	0.943	17128	0.987
PLAG1	-8.09	12	-1.58	0.0568	803	0.961	0.943	17127	0.987
TAF7L	-8.09	12	-1.58	0.0569	804	0.961	0.943	17126	0.987
FOXP2	-8.08	12	-1.58	0.0571	805	0.961	0.943	17125	0.987
CDK7	-8.08	12	-1.58	0.0571	806	0.961	0.943	17124	0.987
COA3	-8.08	12	-1.58	0.0571	807	0.961	0.943	17123	0.987
MRP63	-8.08	12	-1.58	0.0572	808	0.961	0.943	17122	0.987
HAND1	-8.07	12	-1.58	0.0573	809	0.961	0.943	17121	0.987
SPTSSA	-8.07	12	-1.58	0.0574	810	0.961	0.943	17120	0.987
GNRH2	-8.07	12	-1.58	0.0574	811	0.961	0.943	17119	0.987
RCE1	-8.07	12	-1.58	0.0575	812	0.961	0.943	17118	0.987
MORC4	-8.07	12	-1.58	0.0575	813	0.961	0.943	17117	0.987
WNT4	-8.07	12	-1.58	0.0575	814	0.961	0.942	17116	0.987
FAM60A	-8.07	12	-1.58	0.0576	815	0.961	0.942	17115	0.987
SPARC	-8.06	12	-1.57	0.0577	816	0.961	0.942	17114	0.987
HTR1A	-8.06	12	-1.57	0.0578	817	0.961	0.942	17113	0.987
F12	-8.05	12	-1.57	0.0579	818	0.961	0.942	17112	0.987
SNW1	-8.05	12	-1.57	0.058	819	0.961	0.942	17111	0.987
FAM65C	-8.05	12	-1.57	0.058	820	0.961	0.942	17110	0.987
MTUS2	-8.04	12	-1.57	0.0581	821	0.961	0.942	17109	0.987
CEMP1	-8.04	12	-1.57	0.0581	822	0.961	0.942	17108	0.987
GAPDH	-8.04	12	-1.57	0.0582	823	0.961	0.942	17107	0.987
LPCAT4	-8.04	12	-1.57	0.0582	824	0.961	0.942	17106	0.987
CEP250	-8.04	12	-1.57	0.0582	825	0.961	0.942	17105	0.987
M1AP	-8.04	12	-1.57	0.0583	826	0.961	0.942	17104	0.987
CXorf28	-5.68	6	-1.57	0.0583	827	0.961	0.942	17103	0.987
ALDH7A1	-6.96	9	-1.57	0.0583	828	0.961	0.942	17102	0.987
BSCL2	-8.03	12	-1.57	0.0584	829	0.961	0.942	17101	0.987
SPSB2	-8.03	12	-1.57	0.0584	830	0.961	0.942	17100	0.987
FAM89B	-8.03	12	-1.57	0.0584	831	0.961	0.942	17099	0.987
GFI1	-8.02	12	-1.57	0.0586	832	0.961	0.941	17098	0.987
TTLL10	-8.02	12	-1.57	0.0586	833	0.961	0.941	17097	0.987
BLM	-8.02	12	-1.57	0.0587	834	0.961	0.941	17096	0.987
MARS	-8.02	12	-1.57	0.0588	835	0.961	0.941	17095	0.987
VPS52	-8.02	12	-1.57	0.0588	836	0.961	0.941	17094	0.987
TNFRSF11B	-8.01	12	-1.56	0.059	837	0.961	0.941	17093	0.987
MUS81	-8.01	12	-1.56	0.059	838	0.961	0.941	17092	0.987
WRNIP1	-8	12	-1.56	0.0591	839	0.961	0.941	17091	0.987
NSUN4	-8	12	-1.56	0.0591	840	0.961	0.941	17090	0.987
FAIM2	-8	12	-1.56	0.0591	841	0.961	0.941	17089	0.987
PRDM11	-8	12	-1.56	0.0592	842	0.961	0.941	17088	0.987
C14orf132	-8	12	-1.56	0.0592	843	0.961	0.941	17087	0.987
COL4A3BP	-8	12	-1.56	0.0593	844	0.961	0.941	17086	0.987
STX3	-7.99	12	-1.56	0.0593	845	0.961	0.941	17085	0.987
SSH3	-7.99	12	-1.56	0.0594	846	0.961	0.941	17084	0.987
KNSTRN	-7.99	12	-1.56	0.0594	847	0.961	0.941	17083	0.987
CDC25A	-7.99	12	-1.56	0.0595	848	0.961	0.941	17082	0.987
RAD51C	-7.99	12	-1.56	0.0595	849	0.961	0.94	17081	0.987
SEMG1	-7.99	12	-1.56	0.0596	850	0.961	0.94	17080	0.987
MANBAL	-7.98	12	-1.56	0.0596	851	0.961	0.94	17079	0.987
CIAPIN1	-7.64	11	-1.56	0.0596	852	0.961	0.94	17078	0.987
STAMBP	-7.98	12	-1.56	0.0597	853	0.961	0.94	17077	0.987
CABLES2	-7.98	12	-1.56	0.0597	854	0.961	0.94	17076	0.987
LMNA	-6.91	9	-1.56	0.0597	855	0.961	0.94	17075	0.987
TBL1XR1	-7.97	12	-1.56	0.0599	856	0.961	0.94	17074	0.987
COX8A	-7.97	12	-1.56	0.0599	857	0.961	0.94	17073	0.987
ZNF638	-7.97	12	-1.55	0.06	858	0.961	0.94	17072	0.987
ZFP64	-7.96	12	-1.55	0.0601	859	0.961	0.94	17071	0.987
EPDR1	-7.96	12	-1.55	0.0601	860	0.961	0.94	17070	0.987
PERP	-7.96	12	-1.55	0.0602	861	0.961	0.94	17069	0.987
CLCN4	-7.96	12	-1.55	0.0603	862	0.961	0.94	17068	0.987
RIPK2	-7.96	12	-1.55	0.0603	863	0.961	0.94	17067	0.987
POLR2J	-5.63	6	-1.55	0.0603	864	0.961	0.94	17066	0.987
C2orf91	-7.95	12	-1.55	0.0604	865	0.961	0.94	17065	0.987
C15orf57	-7.95	12	-1.55	0.0605	866	0.961	0.939	17064	0.987
HNRNPU	-7.95	12	-1.55	0.0605	867	0.961	0.939	17063	0.987
KCNG3	-7.95	12	-1.55	0.0606	868	0.961	0.939	17062	0.987
LRRN4CL	-7.95	12	-1.55	0.0606	869	0.961	0.939	17061	0.987
APEX2	-7.94	12	-1.55	0.0608	870	0.961	0.939	17060	0.987
ZKSCAN1	-7.94	12	-1.55	0.0608	871	0.961	0.939	17059	0.987
KIAA2013	-7.94	12	-1.55	0.0608	872	0.961	0.939	17058	0.987
RFC2	-7.94	12	-1.55	0.0608	873	0.961	0.939	17057	0.987
SLC44A4	-7.93	12	-1.55	0.0609	874	0.961	0.939	17056	0.987
C2orf70	-7.93	12	-1.55	0.0609	875	0.961	0.939	17055	0.987
URAD	-7.93	12	-1.55	0.0609	876	0.961	0.939	17054	0.987
TLX2	-7.93	12	-1.55	0.061	877	0.961	0.939	17053	0.987
SMU1	-7.23	10	-1.55	0.0612	878	0.961	0.939	17052	0.987
MYRFL	-7.92	12	-1.55	0.0612	879	0.961	0.939	17051	0.987
MKKS	-7.92	12	-1.54	0.0613	880	0.961	0.939	17050	0.987
TCHP	-7.91	12	-1.54	0.0614	881	0.961	0.939	17049	0.987
AMFR	-7.91	12	-1.54	0.0615	882	0.961	0.939	17048	0.987
EPC1	-7.9	12	-1.54	0.0618	883	0.961	0.938	17047	0.987
UBN1	-7.9	12	-1.54	0.0618	884	0.961	0.938	17046	0.987
PRNP	-7.89	12	-1.54	0.0621	885	0.961	0.938	17045	0.987
BRMS1L	-7.89	12	-1.54	0.0621	886	0.961	0.938	17044	0.987
SHROOM4	-7.89	12	-1.54	0.0622	887	0.961	0.938	17043	0.987
EXOC6B	-7.88	12	-1.54	0.0624	888	0.961	0.938	17042	0.986
CDK5	-7.88	12	-1.53	0.0624	889	0.961	0.938	17041	0.986
ZAR1L	-7.88	12	-1.53	0.0625	890	0.961	0.938	17040	0.986
USP24	-7.88	12	-1.53	0.0625	891	0.961	0.938	17039	0.986
MFAP2	-7.87	12	-1.53	0.0626	892	0.961	0.937	17038	0.986
ATOH8	-7.87	12	-1.53	0.0626	893	0.961	0.937	17037	0.986
CFL1	-7.87	12	-1.53	0.0627	894	0.961	0.937	17036	0.986
NCOA6	-7.85	12	-1.53	0.0631	895	0.961	0.937	17035	0.986
RFXAP	-7.85	12	-1.53	0.0631	896	0.961	0.937	17034	0.986
PLEKHB1	-7.85	12	-1.53	0.0631	897	0.961	0.937	17033	0.986
MARVELD2	-7.85	12	-1.53	0.0631	898	0.961	0.937	17032	0.986
CYB5R4	-7.85	12	-1.53	0.0631	899	0.961	0.937	17031	0.986
TSPAN2	-7.85	12	-1.53	0.0632	900	0.961	0.937	17030	0.986
HAVCR2	-7.85	12	-1.53	0.0632	901	0.961	0.937	17029	0.986
PTPRB	-7.85	12	-1.53	0.0633	902	0.961	0.937	17028	0.986
MAP3K12	-7.84	12	-1.53	0.0635	903	0.961	0.936	17027	0.986
CST6	-7.83	12	-1.52	0.0636	904	0.961	0.936	17026	0.986
GCLC	-7.83	12	-1.52	0.0636	905	0.961	0.936	17025	0.986
PTX4	-7.83	12	-1.52	0.0637	906	0.961	0.936	17024	0.986
MRC2	-7.83	12	-1.52	0.0638	907	0.961	0.936	17023	0.986
EMC7	-7.83	12	-1.52	0.0638	908	0.961	0.936	17022	0.986
AGO4	-7.82	12	-1.52	0.0639	909	0.961	0.936	17021	0.986
GTF2A1	-7.82	12	-1.52	0.064	910	0.961	0.936	17020	0.986
SSRP1	-7.81	12	-1.52	0.0641	911	0.961	0.936	17019	0.986
BLOC1S1	-7.81	12	-1.52	0.0641	912	0.961	0.936	17018	0.986
SETD8	-7.81	12	-1.52	0.0643	913	0.961	0.936	17017	0.986
BRIX1	-7.8	12	-1.52	0.0644	914	0.961	0.936	17016	0.986
HCFC1	-7.8	12	-1.52	0.0645	915	0.961	0.935	17015	0.986
CCDC175	-7.8	12	-1.52	0.0645	916	0.961	0.935	17014	0.986
SARNP	-7.8	12	-1.52	0.0646	917	0.961	0.935	17013	0.986
NEK1	-7.79	12	-1.52	0.0647	918	0.961	0.935	17012	0.986
WFDC12	-7.79	12	-1.52	0.0647	919	0.961	0.935	17011	0.986
BMP10	-7.79	12	-1.52	0.0647	920	0.961	0.935	17010	0.986
MLIP	-7.79	12	-1.51	0.0649	921	0.961	0.935	17009	0.986
GDAP2	-7.78	12	-1.51	0.0649	922	0.961	0.935	17008	0.986
PARP4	-7.78	12	-1.51	0.065	923	0.961	0.935	17007	0.986
NUDCD1	-7.78	12	-1.51	0.0651	924	0.961	0.935	17006	0.986
BEX4	-7.78	12	-1.51	0.0651	925	0.961	0.935	17005	0.986
VARS2	-7.78	12	-1.51	0.0651	926	0.961	0.935	17004	0.986
AARSD1	-3.89	3	-1.51	0.0651	927	0.961	0.935	17003	0.986
S100A14	-7.78	12	-1.51	0.0652	928	0.961	0.935	17002	0.986
PARP11	-6.73	9	-1.51	0.0654	929	0.961	0.935	17001	0.986
PRKAR2B	-7.77	12	-1.51	0.0654	930	0.961	0.935	17000	0.986
CCP110	-7.77	12	-1.51	0.0654	931	0.961	0.935	16999	0.986
PLS3	-7.77	12	-1.51	0.0654	932	0.961	0.935	16998	0.986
DEFB116	-7.76	12	-1.51	0.0655	933	0.961	0.935	16997	0.986
CBLN4	-7.76	12	-1.51	0.0655	934	0.961	0.934	16996	0.986
VAMP8	-7.76	12	-1.51	0.0656	935	0.961	0.934	16995	0.986
SLC34A1	-7.75	12	-1.51	0.0658	936	0.961	0.934	16994	0.986
OR5D14	-7.75	12	-1.51	0.0659	937	0.961	0.934	16993	0.986
TSGA10	-7.75	12	-1.51	0.066	938	0.961	0.934	16992	0.986
NSMCE2	-7.75	12	-1.51	0.066	939	0.961	0.934	16991	0.986
RASGRP2	-7.75	12	-1.51	0.066	940	0.961	0.934	16990	0.986
IFIT3	-7.75	12	-1.51	0.066	941	0.961	0.934	16989	0.986
PLCB2	-7.74	12	-1.51	0.0661	942	0.961	0.934	16988	0.986
VSIG1	-7.74	12	-1.51	0.0661	943	0.961	0.934	16987	0.986
FERD3L	-7.74	12	-1.5	0.0662	944	0.961	0.934	16986	0.986
LMO7	-7.74	12	-1.5	0.0662	945	0.961	0.934	16985	0.986
ENY2	-7.74	12	-1.5	0.0662	946	0.961	0.934	16984	0.986
SLC19A1	-7.73	12	-1.5	0.0664	947	0.961	0.934	16983	0.986
DNAJC5G	-7.73	12	-1.5	0.0664	948	0.961	0.934	16982	0.986
NAE1	-7.73	12	-1.5	0.0664	949	0.961	0.934	16981	0.986
PITPNB	-7.73	12	-1.5	0.0666	950	0.961	0.933	16980	0.986
NBN	-7.72	12	-1.5	0.0668	951	0.961	0.933	16979	0.985
C8orf58	-7.72	12	-1.5	0.0668	952	0.961	0.933	16978	0.985
GUK1	-7.71	12	-1.5	0.0669	953	0.961	0.933	16977	0.985
ERN2	-7.71	12	-1.5	0.0669	954	0.961	0.933	16976	0.985
B4GALNT1	-7.71	12	-1.5	0.067	955	0.961	0.933	16975	0.985
FBXO36	-7.71	12	-1.5	0.0671	956	0.961	0.933	16974	0.985
RCBTB2	-7.71	12	-1.5	0.0671	957	0.961	0.933	16973	0.985
PKNOX2	-7.7	12	-1.5	0.0672	958	0.961	0.933	16972	0.985
SLC26A8	-7.7	12	-1.5	0.0672	959	0.961	0.933	16971	0.985
GALNT6	-7.7	12	-1.5	0.0673	960	0.961	0.933	16970	0.985
USP50	-7.7	12	-1.5	0.0674	961	0.961	0.933	16969	0.985
DYRK4	-7.7	12	-1.5	0.0674	962	0.961	0.933	16968	0.985
CLK2	-7.69	12	-1.49	0.0675	963	0.961	0.933	16967	0.985
SCNN1B	-7.69	12	-1.49	0.0676	964	0.961	0.932	16966	0.985
FAM131C	-7.69	12	-1.49	0.0676	965	0.961	0.932	16965	0.985
SEPHS2	-7.68	12	-1.49	0.0678	966	0.961	0.932	16964	0.985
TTF2	-7.68	12	-1.49	0.0679	967	0.961	0.932	16963	0.985
FANCC	-7.68	12	-1.49	0.0679	968	0.961	0.932	16962	0.985
PLCB4	-7.68	12	-1.49	0.068	969	0.961	0.932	16961	0.985
MRPL37	-7.68	12	-1.49	0.068	970	0.961	0.932	16960	0.985
VRK1	-7.67	12	-1.49	0.068	971	0.961	0.932	16959	0.985
RANBP3	-7.67	12	-1.49	0.0681	972	0.961	0.932	16958	0.985
FAM19A1	-7.67	12	-1.49	0.0681	973	0.961	0.932	16957	0.985
VPS4B	-7.67	12	-1.49	0.0682	974	0.961	0.932	16956	0.985
DGAT2L6	-7.67	12	-1.49	0.0682	975	0.961	0.932	16955	0.985
SYNGR3	-7.67	12	-1.49	0.0683	976	0.961	0.932	16954	0.985
CIAO1	-7.67	12	-1.49	0.0683	977	0.961	0.932	16953	0.985
TNFRSF10C	-7.66	12	-1.49	0.0685	978	0.961	0.931	16952	0.985
SLC24A4	-7.66	12	-1.49	0.0686	979	0.961	0.931	16951	0.985
SLC26A7	-7.65	12	-1.49	0.0687	980	0.961	0.931	16950	0.985
SAMM50	-7.65	12	-1.48	0.0688	981	0.961	0.931	16949	0.985
SIX6	-7.65	12	-1.48	0.0688	982	0.961	0.931	16948	0.985
GSS	-7.65	12	-1.48	0.0689	983	0.961	0.931	16947	0.985
NUBP2	-7.64	12	-1.48	0.0691	984	0.961	0.931	16946	0.985
THAP3	-7.64	12	-1.48	0.0691	985	0.961	0.931	16945	0.985
C2orf42	-7.62	12	-1.48	0.0695	986	0.961	0.931	16944	0.985
ECE1	-7.62	12	-1.48	0.0696	987	0.961	0.93	16943	0.985
DCTN5	-7.62	12	-1.48	0.0696	988	0.961	0.93	16942	0.985
GNB2L1	-7.62	12	-1.48	0.0697	989	0.961	0.93	16941	0.985
TOMM20L	-7.61	12	-1.48	0.0698	990	0.961	0.93	16940	0.985
LHFPL4	-7.61	12	-1.48	0.0698	991	0.961	0.93	16939	0.985
ZGPAT	-7.61	12	-1.48	0.0698	992	0.961	0.93	16938	0.985
PAQR7	-7.61	12	-1.48	0.0699	993	0.961	0.93	16937	0.985
ALK	-7.61	12	-1.48	0.0699	994	0.961	0.93	16936	0.985
CLSTN3	-7.61	12	-1.48	0.0699	995	0.961	0.93	16935	0.985
HN1L	-7.61	12	-1.48	0.0699	996	0.961	0.93	16934	0.985
KIAA1143	-7.61	12	-1.48	0.07	997	0.961	0.93	16933	0.985
SULF2	-7.61	12	-1.48	0.07	998	0.961	0.93	16932	0.985
ABCA3	-7.61	12	-1.48	0.07	999	0.961	0.93	16931	0.985
BCKDK	-7.6	12	-1.47	0.0701	1000	0.961	0.93	16930	0.985
EEF1G	-7.6	12	-1.47	0.0701	1001	0.961	0.93	16929	0.985
DDX23	-7.59	12	-1.47	0.0704	1002	0.961	0.93	16928	0.985
MKRN2	-7.59	12	-1.47	0.0704	1003	0.961	0.93	16927	0.985
HIST1H2AK	-7.59	12	-1.47	0.0705	1004	0.961	0.93	16926	0.985
MPPED2	-7.59	12	-1.47	0.0705	1005	0.961	0.93	16925	0.985
NCKAP5	-7.58	12	-1.47	0.0707	1006	0.961	0.929	16924	0.984
OR14A2	-7.58	12	-1.47	0.0707	1007	0.961	0.929	16923	0.984
MOS	-7.58	12	-1.47	0.0708	1008	0.961	0.929	16922	0.984
GFER	-7.58	12	-1.47	0.0708	1009	0.961	0.929	16921	0.984
DDX5	-7.58	12	-1.47	0.0708	1010	0.961	0.929	16920	0.984
ZNF250	-7.57	12	-1.47	0.071	1011	0.961	0.929	16919	0.984
ALS2CR11	-7.57	12	-1.47	0.071	1012	0.961	0.929	16918	0.984
NKAPL	-7.57	12	-1.47	0.0711	1013	0.961	0.929	16917	0.984
PPP2R5E	-7.56	12	-1.47	0.0712	1014	0.961	0.929	16916	0.984
PNMA2	-7.56	12	-1.47	0.0713	1015	0.961	0.929	16915	0.984
CDK1	-7.56	12	-1.47	0.0714	1016	0.961	0.929	16914	0.984
SLC6A14	-7.56	12	-1.46	0.0715	1017	0.961	0.928	16913	0.984
STC1	-7.55	12	-1.46	0.0715	1018	0.961	0.928	16912	0.984
MOB1A	-7.55	12	-1.46	0.0715	1019	0.961	0.928	16911	0.984
CDC20B	-7.55	12	-1.46	0.0716	1020	0.961	0.928	16910	0.984
CSN2	-7.55	12	-1.46	0.0716	1021	0.961	0.928	16909	0.984
PRRC2A	-7.55	12	-1.46	0.0717	1022	0.961	0.928	16908	0.984
TENM4	-7.53	12	-1.46	0.0722	1023	0.961	0.928	16907	0.984
LMO2	-7.53	12	-1.46	0.0722	1024	0.961	0.928	16906	0.984
PPP1R11	-7.53	12	-1.46	0.0722	1025	0.961	0.928	16905	0.984
PPIG	-7.52	12	-1.46	0.0725	1026	0.961	0.927	16904	0.984
LIPT1	-7.52	12	-1.46	0.0726	1027	0.961	0.927	16903	0.984
GRIPAP1	-7.52	12	-1.46	0.0726	1028	0.961	0.927	16902	0.984
BAG5	-7.52	12	-1.46	0.0727	1029	0.961	0.927	16901	0.984
NDUFA10	-7.52	12	-1.46	0.0727	1030	0.961	0.927	16900	0.984
SRSF6	-7.51	12	-1.46	0.0728	1031	0.961	0.927	16899	0.984
CNRIP1	-7.51	12	-1.45	0.0729	1032	0.961	0.927	16898	0.984
PPT2	-7.51	12	-1.45	0.0729	1033	0.961	0.927	16897	0.984
SMC6	-7.51	12	-1.45	0.0729	1034	0.961	0.927	16896	0.984
C7orf62	-7.51	12	-1.45	0.073	1035	0.961	0.927	16895	0.984
SLC25A15	-7.51	12	-1.45	0.073	1036	0.961	0.927	16894	0.984
CYP26B1	-7.51	12	-1.45	0.073	1037	0.961	0.927	16893	0.984
DNMT1	-7.5	12	-1.45	0.0732	1038	0.961	0.927	16892	0.984
NEURL1B	-7.5	12	-1.45	0.0733	1039	0.961	0.927	16891	0.984
OR52I2	-5.3	6	-1.45	0.0734	1040	0.961	0.927	16890	0.984
SMOX	-7.49	12	-1.45	0.0735	1041	0.961	0.927	16889	0.984
LGALS12	-7.49	12	-1.45	0.0735	1042	0.961	0.927	16888	0.984
C6orf25	-7.49	12	-1.45	0.0736	1043	0.961	0.926	16887	0.984
MAGEC3	-7.48	12	-1.45	0.0738	1044	0.961	0.926	16886	0.983
AZIN1	-7.47	12	-1.45	0.074	1045	0.961	0.926	16885	0.983
SLX4	-6.47	9	-1.45	0.0742	1046	0.961	0.926	16884	0.983
PSMB6	-7.47	12	-1.45	0.0742	1047	0.961	0.926	16883	0.983
MBIP	-7.47	12	-1.45	0.0742	1048	0.961	0.926	16882	0.983
NUDT8	-6.47	9	-1.45	0.0742	1049	0.961	0.926	16881	0.983
CNBD2	-7.46	12	-1.44	0.0744	1050	0.961	0.926	16880	0.983
LRRC14B	-7.46	12	-1.44	0.0744	1051	0.961	0.926	16879	0.983
TMEM186	-7.46	12	-1.44	0.0745	1052	0.961	0.926	16878	0.983
ZNF831	-7.46	12	-1.44	0.0745	1053	0.961	0.925	16877	0.983
COX6A2	-7.45	12	-1.44	0.0747	1054	0.961	0.925	16876	0.983
BEST1	-7.45	12	-1.44	0.0747	1055	0.961	0.925	16875	0.983
NRIP2	-7.45	12	-1.44	0.0747	1056	0.961	0.925	16874	0.983
TNFRSF25	-7.44	12	-1.44	0.075	1057	0.961	0.925	16873	0.983
FAM217B	-7.44	12	-1.44	0.075	1058	0.961	0.925	16872	0.983
GGT7	-7.43	12	-1.44	0.0752	1059	0.961	0.925	16871	0.983
RPA2	-7.43	12	-1.44	0.0753	1060	0.961	0.925	16870	0.983
PTGDR2	-7.43	12	-1.44	0.0753	1061	0.961	0.925	16869	0.983
GCLM	-7.43	12	-1.44	0.0754	1062	0.961	0.925	16868	0.983
ZNF200	-7.43	12	-1.44	0.0754	1063	0.961	0.925	16867	0.983
MIPEP	-7.43	12	-1.44	0.0754	1064	0.961	0.925	16866	0.983
ACY3	-7.42	12	-1.44	0.0756	1065	0.961	0.924	16865	0.983
VPS37C	-7.42	12	-1.44	0.0756	1066	0.961	0.924	16864	0.983
DOCK5	-7.41	12	-1.43	0.0759	1067	0.961	0.924	16863	0.983
C10orf129	-7.41	12	-1.43	0.0761	1068	0.961	0.924	16862	0.982
LEP	-7.4	12	-1.43	0.0762	1069	0.961	0.924	16861	0.982
GSTK1	-7.4	12	-1.43	0.0762	1070	0.961	0.924	16860	0.982
GJB7	-7.4	12	-1.43	0.0763	1071	0.961	0.924	16859	0.982
C14orf166	-7.4	12	-1.43	0.0764	1072	0.961	0.924	16858	0.982
UBL3	-7.4	12	-1.43	0.0764	1073	0.961	0.924	16857	0.982
PNISR	-7.39	12	-1.43	0.0765	1074	0.961	0.924	16856	0.982
ANKRD35	-7.39	12	-1.43	0.0765	1075	0.961	0.924	16855	0.982
ARCN1	-7.39	12	-1.43	0.0765	1076	0.961	0.923	16854	0.982
TOE1	-7.39	12	-1.43	0.0767	1077	0.961	0.923	16853	0.982
FLYWCH1	-7.39	12	-1.43	0.0767	1078	0.961	0.923	16852	0.982
SMIM19	-6.4	9	-1.43	0.0767	1079	0.961	0.923	16851	0.982
TRPT1	-7.38	12	-1.43	0.0768	1080	0.961	0.923	16850	0.982
LDLRAD4	-7.38	12	-1.43	0.077	1081	0.961	0.923	16849	0.982
EME2	-7.38	12	-1.43	0.077	1082	0.961	0.923	16848	0.982
IFITM1	-7.38	12	-1.43	0.077	1083	0.961	0.923	16847	0.982
ZDHHC24	-7.38	12	-1.43	0.077	1084	0.961	0.923	16846	0.982
HEBP1	-7.37	12	-1.43	0.077	1085	0.961	0.923	16845	0.982
SPRED2	-7.37	12	-1.42	0.0771	1086	0.961	0.923	16844	0.982
SF3B2	-7.37	12	-1.42	0.0773	1087	0.961	0.923	16843	0.982
MRRF	-7.36	12	-1.42	0.0774	1088	0.961	0.923	16842	0.982
TFIP11	-7.36	12	-1.42	0.0775	1089	0.961	0.923	16841	0.982
FOXK1	-7.36	12	-1.42	0.0775	1090	0.961	0.922	16840	0.982
PANK2	-7.36	12	-1.42	0.0776	1091	0.961	0.922	16839	0.982
PSEN1	-7.36	12	-1.42	0.0776	1092	0.961	0.922	16838	0.982
OR5T1	-7.35	12	-1.42	0.0777	1093	0.961	0.922	16837	0.982
XRN1	-7.35	12	-1.42	0.0778	1094	0.961	0.922	16836	0.982
INTS7	-7.35	12	-1.42	0.0778	1095	0.961	0.922	16835	0.982
LRRN4	-7.35	12	-1.42	0.0779	1096	0.961	0.922	16834	0.982
TNNC2	-7.35	12	-1.42	0.0779	1097	0.961	0.922	16833	0.982
CRTC2	-7.35	12	-1.42	0.078	1098	0.961	0.922	16832	0.982
SYNCRIP	-7.34	12	-1.42	0.0781	1099	0.961	0.922	16831	0.982
CYLC1	-7.34	12	-1.42	0.0781	1100	0.961	0.922	16830	0.982
TPSG1	-7.34	12	-1.42	0.0781	1101	0.961	0.922	16829	0.982
GCC1	-7.33	12	-1.42	0.0784	1102	0.961	0.922	16828	0.982
SDHAF2	-7.33	12	-1.42	0.0785	1103	0.961	0.922	16827	0.982
JRKL	-7.33	12	-1.42	0.0785	1104	0.961	0.922	16826	0.982
RBL2	-7.33	12	-1.42	0.0785	1105	0.961	0.922	16825	0.982
TUBB	-7.33	12	-1.41	0.0786	1106	0.961	0.921	16824	0.982
ERCC4	-7.32	12	-1.41	0.0787	1107	0.961	0.921	16823	0.982
MSMO1	-7.32	12	-1.41	0.0788	1108	0.961	0.921	16822	0.982
IL27	-7.32	12	-1.41	0.0789	1109	0.961	0.921	16821	0.982
UBQLN3	-7.32	12	-1.41	0.0789	1110	0.961	0.921	16820	0.982
EPHX2	-7	11	-1.41	0.0789	1111	0.961	0.921	16819	0.982
STAT6	-7.31	12	-1.41	0.079	1112	0.961	0.921	16818	0.982
CHIA	-7.31	12	-1.41	0.0791	1113	0.961	0.921	16817	0.982
TFR2	-7.31	12	-1.41	0.0791	1114	0.961	0.921	16816	0.982
GCH1	-7.3	12	-1.41	0.0793	1115	0.961	0.921	16815	0.982
FAM208A	-7.3	12	-1.41	0.0793	1116	0.961	0.921	16814	0.982
CDIPT	-7.3	12	-1.41	0.0794	1117	0.961	0.921	16813	0.982
KRT18	-6.32	9	-1.41	0.0794	1118	0.961	0.921	16812	0.982
ARAP1	-7.3	12	-1.41	0.0795	1119	0.961	0.921	16811	0.982
EARS2	-7.3	12	-1.41	0.0795	1120	0.961	0.92	16810	0.982
C6orf52	-7.3	12	-1.41	0.0795	1121	0.961	0.92	16809	0.982
POLL	-7.29	12	-1.41	0.0797	1122	0.961	0.92	16808	0.982
CD6	-7.29	12	-1.41	0.0798	1123	0.961	0.92	16807	0.982
MARK2	-7.29	12	-1.41	0.0799	1124	0.961	0.92	16806	0.982
CLHC1	-7.28	12	-1.41	0.0799	1125	0.961	0.92	16805	0.982
TBX21	-7.28	12	-1.4	0.0801	1126	0.961	0.92	16804	0.981
KIAA1737	-7.27	12	-1.4	0.0804	1127	0.961	0.92	16803	0.981
CEP57	-7.27	12	-1.4	0.0805	1128	0.961	0.92	16802	0.981
PCGF6	-7.26	12	-1.4	0.0806	1129	0.961	0.919	16801	0.981
CCDC169	-6.28	9	-1.4	0.0809	1130	0.961	0.919	16800	0.981
ARL2	-7.26	12	-1.4	0.0809	1131	0.961	0.919	16799	0.981
SLC26A4	-7.25	12	-1.4	0.081	1132	0.961	0.919	16798	0.981
CCAR2	-7.25	12	-1.4	0.0811	1133	0.961	0.919	16797	0.981
MBLAC1	-7.24	12	-1.4	0.0814	1134	0.961	0.919	16796	0.981
KIF17	-7.24	12	-1.4	0.0814	1135	0.961	0.919	16795	0.981
PTPN14	-7.24	12	-1.4	0.0814	1136	0.961	0.919	16794	0.981
PKMYT1	-7.24	12	-1.39	0.0815	1137	0.961	0.918	16793	0.981
DPF2	-7.23	12	-1.39	0.0817	1138	0.961	0.918	16792	0.981
NME3	-7.23	12	-1.39	0.0817	1139	0.961	0.918	16791	0.981
E2F7	-7.23	12	-1.39	0.0818	1140	0.961	0.918	16790	0.981
CDCP2	-7.23	12	-1.39	0.0818	1141	0.961	0.918	16789	0.981
RGS22	-7.22	12	-1.39	0.082	1142	0.961	0.918	16788	0.98
SRXN1	-7.22	12	-1.39	0.0821	1143	0.961	0.918	16787	0.98
S1PR2	-7.22	12	-1.39	0.0821	1144	0.961	0.918	16786	0.98
FAM3D	-7.22	12	-1.39	0.0821	1145	0.961	0.918	16785	0.98
PPA2	-7.22	12	-1.39	0.0822	1146	0.961	0.918	16784	0.98
ACSM3	-7.22	12	-1.39	0.0822	1147	0.961	0.918	16783	0.98
RNF40	-7.21	12	-1.39	0.0822	1148	0.961	0.918	16782	0.98
MSH6	-7.21	12	-1.39	0.0822	1149	0.961	0.918	16781	0.98
TRIM40	-7.21	12	-1.39	0.0824	1150	0.961	0.918	16780	0.98
CCDC25	-7.21	12	-1.39	0.0825	1151	0.961	0.917	16779	0.98
SATB1	-7.21	12	-1.39	0.0825	1152	0.961	0.917	16778	0.98
DBX1	-7.2	12	-1.39	0.0826	1153	0.961	0.917	16777	0.98
FAM46B	-7.2	12	-1.39	0.0826	1154	0.961	0.917	16776	0.98
LYPLA1	-7.2	12	-1.39	0.0827	1155	0.961	0.917	16775	0.98
IBA57	-7.2	12	-1.39	0.0828	1156	0.961	0.917	16774	0.98
CD63	-7.19	12	-1.39	0.083	1157	0.961	0.917	16773	0.98
CASC5	-7.19	12	-1.38	0.083	1158	0.961	0.917	16772	0.98
FKBP6	-7.19	12	-1.38	0.0831	1159	0.961	0.917	16771	0.98
POT1	-7.18	12	-1.38	0.0832	1160	0.961	0.917	16770	0.98
BCLAF1	-6.87	11	-1.38	0.0834	1161	0.961	0.917	16769	0.98
SLC48A1	-7.18	12	-1.38	0.0835	1162	0.961	0.917	16768	0.98
PDE1B	-7.18	12	-1.38	0.0835	1163	0.961	0.917	16767	0.98
SKA1	-7.17	12	-1.38	0.0836	1164	0.961	0.916	16766	0.98
ACAA2	-7.17	12	-1.38	0.0837	1165	0.961	0.916	16765	0.98
KDM5B	-7.17	12	-1.38	0.0838	1166	0.961	0.916	16764	0.98
BRCC3	-7.17	12	-1.38	0.0838	1167	0.961	0.916	16763	0.98
PLGRKT	-7.17	12	-1.38	0.0838	1168	0.961	0.916	16762	0.98
FAM133B	-3.58	3	-1.38	0.0838	1169	0.961	0.916	16761	0.98
GTF2A2	-7.16	12	-1.38	0.0839	1170	0.961	0.916	16760	0.98
SLC26A10	-7.16	12	-1.38	0.0841	1171	0.961	0.916	16759	0.98
PRSS21	-7.15	12	-1.38	0.0843	1172	0.961	0.916	16758	0.98
SMC5	-7.15	12	-1.38	0.0844	1173	0.961	0.916	16757	0.98
RB1CC1	-7.15	12	-1.38	0.0845	1174	0.961	0.916	16756	0.98
MCM6	-7.14	12	-1.37	0.0847	1175	0.961	0.915	16755	0.979
TSPAN18	-7.14	12	-1.37	0.0848	1176	0.961	0.915	16754	0.979
ZNF582	-6.18	9	-1.37	0.0849	1177	0.961	0.915	16753	0.979
DNAJB6	-6.18	9	-1.37	0.0849	1178	0.961	0.915	16752	0.979
BCS1L	-7.13	12	-1.37	0.085	1179	0.961	0.915	16751	0.979
TJAP1	-7.13	12	-1.37	0.085	1180	0.961	0.915	16750	0.979
PRSS36	-7.12	12	-1.37	0.0853	1181	0.961	0.915	16749	0.979
TFCP2	-7.12	12	-1.37	0.0853	1182	0.961	0.915	16748	0.979
ALG12	-7.12	12	-1.37	0.0855	1183	0.961	0.914	16747	0.979
KIAA1024L	-7.11	12	-1.37	0.0856	1184	0.961	0.914	16746	0.979
TRO	-7.11	12	-1.37	0.0856	1185	0.961	0.914	16745	0.979
MTRF1	-7.11	12	-1.37	0.0858	1186	0.961	0.914	16744	0.979
TSC22D4	-7.11	12	-1.37	0.0858	1187	0.961	0.914	16743	0.979
GPR19	-7.1	12	-1.37	0.0859	1188	0.961	0.914	16742	0.979
GPR22	-7.1	12	-1.37	0.0861	1189	0.961	0.914	16741	0.979
CSTF1	-7.1	12	-1.36	0.0862	1190	0.961	0.914	16740	0.979
SLC22A7	-7.09	12	-1.36	0.0864	1191	0.961	0.914	16739	0.979
STK11	-7.09	12	-1.36	0.0865	1192	0.961	0.914	16738	0.979
DHX40	-7.09	12	-1.36	0.0865	1193	0.961	0.913	16737	0.979
PTPN6	-7.09	12	-1.36	0.0865	1194	0.961	0.913	16736	0.979
FAM105B	-6.14	9	-1.36	0.0865	1195	0.961	0.913	16735	0.979
FBXW11	-7.09	12	-1.36	0.0866	1196	0.961	0.913	16734	0.979
SRP9	-7.08	12	-1.36	0.0866	1197	0.961	0.913	16733	0.979
C6orf222	-7.08	12	-1.36	0.0867	1198	0.961	0.913	16732	0.979
HS6ST1	-7.08	12	-1.36	0.0868	1199	0.961	0.913	16731	0.979
PRDM16	-7.08	12	-1.36	0.0868	1200	0.961	0.913	16730	0.979
SPAG16	-7.08	12	-1.36	0.0868	1201	0.961	0.913	16729	0.979
PLCB3	-7.07	12	-1.36	0.087	1202	0.961	0.913	16728	0.979
RTN3	-7.07	12	-1.36	0.0871	1203	0.961	0.913	16727	0.978
2021-03-09	-7.07	12	-1.36	0.0872	1204	0.961	0.913	16726	0.978
FANCB	-7.06	12	-1.36	0.0873	1205	0.961	0.913	16725	0.978
TNPO1	-7.06	12	-1.36	0.0873	1206	0.961	0.913	16724	0.978
SPATA2	-7.06	12	-1.36	0.0874	1207	0.961	0.913	16723	0.978
METRN	-7.06	12	-1.36	0.0874	1208	0.961	0.913	16722	0.978
CASS4	-7.06	12	-1.36	0.0875	1209	0.961	0.912	16721	0.978
IL15	-3.53	3	-1.36	0.0875	1210	0.961	0.912	16720	0.978
GZMK	-7.06	12	-1.36	0.0875	1211	0.961	0.912	16719	0.978
AOC3	-7.05	12	-1.36	0.0877	1212	0.961	0.912	16718	0.978
GIMAP8	-7.05	12	-1.36	0.0877	1213	0.961	0.912	16717	0.978
TMEM203	-7.05	12	-1.36	0.0877	1214	0.961	0.912	16716	0.978
MAGEE1	-7.05	12	-1.35	0.0877	1215	0.961	0.912	16715	0.978
PRH2	-7.05	12	-1.35	0.0878	1216	0.961	0.912	16714	0.978
NEDD1	-7.05	12	-1.35	0.0878	1217	0.961	0.912	16713	0.978
CENPB	-7.05	12	-1.35	0.0878	1218	0.961	0.912	16712	0.978
TMEM130	-7.05	12	-1.35	0.0879	1219	0.961	0.912	16711	0.978
THSD1	-7.05	12	-1.35	0.0879	1220	0.961	0.912	16710	0.978
LENEP	-7.05	12	-1.35	0.088	1221	0.961	0.912	16709	0.978
SELE	-7.04	12	-1.35	0.088	1222	0.961	0.912	16708	0.978
C16orf91	-7.04	12	-1.35	0.0881	1223	0.961	0.912	16707	0.978
SAMD9L	-7.04	12	-1.35	0.0881	1224	0.961	0.912	16706	0.978
EML1	-7.04	12	-1.35	0.0881	1225	0.961	0.912	16705	0.978
SAMD13	-7.04	12	-1.35	0.0881	1226	0.961	0.912	16704	0.978
TGM6	-7.04	12	-1.35	0.0882	1227	0.961	0.912	16703	0.978
FAM69C	-7.04	12	-1.35	0.0883	1228	0.961	0.912	16702	0.978
SNRPB	-6.74	11	-1.35	0.0883	1229	0.961	0.912	16701	0.978
ST8SIA3	-7.04	12	-1.35	0.0883	1230	0.961	0.912	16700	0.978
POC1B	-7.04	12	-1.35	0.0883	1231	0.961	0.912	16699	0.978
FNDC4	-7.03	12	-1.35	0.0884	1232	0.961	0.912	16698	0.978
HMMR	-7.03	12	-1.35	0.0884	1233	0.961	0.912	16697	0.978
MPPE1	-7.03	12	-1.35	0.0884	1234	0.961	0.912	16696	0.978
PSG3	-3.52	3	-1.35	0.0884	1235	0.961	0.912	16695	0.978
COPZ1	-7.03	12	-1.35	0.0885	1236	0.961	0.912	16694	0.978
CNDP2	-7.03	12	-1.35	0.0885	1237	0.961	0.911	16693	0.978
CDC42BPG	-7.03	12	-1.35	0.0886	1238	0.961	0.911	16692	0.978
E2F6	-6.09	9	-1.35	0.0886	1239	0.961	0.911	16691	0.978
FAM173B	-7.03	12	-1.35	0.0887	1240	0.961	0.911	16690	0.978
ITPA	-7.02	12	-1.35	0.0887	1241	0.961	0.911	16689	0.978
HIST1H3H	-7.02	12	-1.35	0.0888	1242	0.961	0.911	16688	0.978
PI4KB	-7.02	12	-1.35	0.0888	1243	0.961	0.911	16687	0.978
ARID2	-7.02	12	-1.35	0.0889	1244	0.961	0.911	16686	0.978
TOR3A	-7.02	12	-1.35	0.089	1245	0.961	0.911	16685	0.978
BABAM1	-7.02	12	-1.35	0.089	1246	0.961	0.911	16684	0.978
AMOT	-7.01	12	-1.35	0.0892	1247	0.961	0.911	16683	0.978
NYAP2	-7.01	12	-1.35	0.0892	1248	0.961	0.911	16682	0.978
AP2M1	-7	12	-1.34	0.0894	1249	0.961	0.911	16681	0.978
KLF13	-7	12	-1.34	0.0895	1250	0.961	0.911	16680	0.978
TREM1	-7	12	-1.34	0.0895	1251	0.961	0.911	16679	0.978
IL13	-7	12	-1.34	0.0895	1252	0.961	0.91	16678	0.978
PTCRA	-7	12	-1.34	0.0896	1253	0.961	0.91	16677	0.978
ADAM19	-7	12	-1.34	0.0896	1254	0.961	0.91	16676	0.978
SLC29A1	-7	12	-1.34	0.0897	1255	0.961	0.91	16675	0.978
DDX6	-7	12	-1.34	0.0897	1256	0.961	0.91	16674	0.978
KCTD5	-7	12	-1.34	0.0897	1257	0.961	0.91	16673	0.978
SKI	-7	12	-1.34	0.0897	1258	0.961	0.91	16672	0.978
EMB	-6.99	12	-1.34	0.0898	1259	0.961	0.91	16671	0.978
IL36G	-6.05	9	-1.34	0.0899	1260	0.961	0.91	16670	0.978
IPO11	-6.99	12	-1.34	0.0899	1261	0.961	0.91	16669	0.978
CCDC12	-6.99	12	-1.34	0.09	1262	0.961	0.91	16668	0.978
MON1B	-6.98	12	-1.34	0.0902	1263	0.961	0.91	16667	0.978
ZNF768	-6.97	12	-1.34	0.0905	1264	0.961	0.909	16666	0.978
PELI1	-6.97	12	-1.34	0.0905	1265	0.961	0.909	16665	0.978
AURKA	-6.97	12	-1.34	0.0905	1266	0.961	0.909	16664	0.978
TBX22	-6.97	12	-1.34	0.0905	1267	0.961	0.909	16663	0.978
RPS6KA4	-6.97	12	-1.34	0.0906	1268	0.961	0.909	16662	0.978
PDILT	-6.97	12	-1.34	0.0906	1269	0.961	0.909	16661	0.978
IFITM10	-6.97	12	-1.34	0.0907	1270	0.961	0.909	16660	0.978
RBBP7	-6.97	12	-1.34	0.0908	1271	0.961	0.909	16659	0.978
CHRM4	-6.96	12	-1.34	0.0909	1272	0.961	0.909	16658	0.978
WDR90	-6.96	12	-1.34	0.0909	1273	0.961	0.909	16657	0.978
ARTN	-6.96	12	-1.33	0.091	1274	0.961	0.909	16656	0.978
ZNF366	-6.96	12	-1.33	0.0911	1275	0.961	0.909	16655	0.978
CRP	-6.95	12	-1.33	0.0912	1276	0.961	0.909	16654	0.978
KLHL13	-6.02	9	-1.33	0.0912	1277	0.961	0.909	16653	0.978
C11orf83	-6.95	12	-1.33	0.0914	1278	0.961	0.909	16652	0.978
RPGR	-6.94	12	-1.33	0.0916	1279	0.961	0.908	16651	0.978
ITGA3	-6.94	12	-1.33	0.0916	1280	0.961	0.908	16650	0.978
SCRN1	-6.94	12	-1.33	0.0916	1281	0.961	0.908	16649	0.978
ATP8A2	-6.94	12	-1.33	0.0917	1282	0.961	0.908	16648	0.978
MSX2	-6.94	12	-1.33	0.0917	1283	0.961	0.908	16647	0.978
AGR3	-6.94	12	-1.33	0.0918	1284	0.961	0.908	16646	0.978
ZBTB2	-6.93	12	-1.33	0.0922	1285	0.961	0.908	16645	0.978
STON1	-3.46	3	-1.33	0.0922	1286	0.961	0.908	16644	0.978
CD19	-6.93	12	-1.33	0.0922	1287	0.961	0.908	16643	0.978
NFASC	-6.93	12	-1.33	0.0922	1288	0.961	0.908	16642	0.978
NRSN2	-6.92	12	-1.33	0.0923	1289	0.961	0.908	16641	0.978
IRS4	-6.92	12	-1.33	0.0924	1290	0.961	0.908	16640	0.978
LY6G6D	-6.92	12	-1.33	0.0924	1291	0.961	0.908	16639	0.978
PI16	-6.92	12	-1.33	0.0924	1292	0.961	0.908	16638	0.978
C8orf31	-6.92	12	-1.33	0.0925	1293	0.961	0.908	16637	0.978
PLP1	-6.92	12	-1.33	0.0925	1294	0.961	0.907	16636	0.978
EDDM3B	-5.99	9	-1.32	0.0926	1295	0.961	0.907	16635	0.978
C20orf173	-6.91	12	-1.32	0.0926	1296	0.961	0.907	16634	0.978
MYL10	-6.91	12	-1.32	0.0926	1297	0.961	0.907	16633	0.978
LSP1	-6.91	12	-1.32	0.0927	1298	0.961	0.907	16632	0.978
RBL1	-6.91	12	-1.32	0.0927	1299	0.961	0.907	16631	0.978
CAB39L	-6.91	12	-1.32	0.0928	1300	0.961	0.907	16630	0.978
CSPG4	-6.91	12	-1.32	0.0929	1301	0.961	0.907	16629	0.978
TST	-6.91	12	-1.32	0.0929	1302	0.961	0.907	16628	0.978
UBXN2B	-6.91	12	-1.32	0.0929	1303	0.961	0.907	16627	0.978
DHCR7	-6.9	12	-1.32	0.093	1304	0.961	0.907	16626	0.978
PDZD11	-6.9	12	-1.32	0.093	1305	0.961	0.907	16625	0.978
COG6	-6.9	12	-1.32	0.0931	1306	0.961	0.907	16624	0.978
ESRRA	-6.9	12	-1.32	0.0931	1307	0.961	0.907	16623	0.978
XCR1	-6.9	12	-1.32	0.0931	1308	0.961	0.907	16622	0.978
VSTM2L	-6.9	12	-1.32	0.0932	1309	0.961	0.907	16621	0.978
CCNE2	-6.9	12	-1.32	0.0933	1310	0.961	0.907	16620	0.978
CXXC5	-6.9	12	-1.32	0.0933	1311	0.961	0.907	16619	0.978
RFC5	-6.9	12	-1.32	0.0933	1312	0.961	0.907	16618	0.978
KCND1	-6.89	12	-1.32	0.0934	1313	0.961	0.907	16617	0.978
CLCN7	-6.89	12	-1.32	0.0934	1314	0.961	0.907	16616	0.978
PYCR1	-5.97	9	-1.32	0.0935	1315	0.961	0.906	16615	0.978
TEX11	-6.89	12	-1.32	0.0935	1316	0.961	0.906	16614	0.978
SERPINB12	-6.89	12	-1.32	0.0936	1317	0.961	0.906	16613	0.978
ABCB1	-6.89	12	-1.32	0.0936	1318	0.961	0.906	16612	0.978
CEBPE	-6.88	12	-1.32	0.0939	1319	0.961	0.906	16611	0.978
FRMD6	-6.88	12	-1.32	0.0939	1320	0.961	0.906	16610	0.978
F3	-6.88	12	-1.32	0.094	1321	0.961	0.906	16609	0.978
DAG1	-6.88	12	-1.32	0.094	1322	0.961	0.906	16608	0.978
2021-09-02	-6.88	12	-1.32	0.094	1323	0.961	0.906	16607	0.978
PRMT2	-6.87	12	-1.32	0.0941	1324	0.961	0.906	16606	0.978
DAPK2	-6.87	12	-1.32	0.0941	1325	0.961	0.906	16605	0.978
MRPS2	-6.87	12	-1.32	0.0942	1326	0.961	0.906	16604	0.978
GAB3	-6.87	12	-1.32	0.0942	1327	0.961	0.906	16603	0.978
POGZ	-6.87	12	-1.32	0.0942	1328	0.961	0.906	16602	0.978
VPS36	-6.87	12	-1.32	0.0942	1329	0.961	0.906	16601	0.978
SNAPIN	-6.87	12	-1.32	0.0943	1330	0.961	0.906	16600	0.978
PRPH	-6.87	12	-1.31	0.0943	1331	0.961	0.906	16599	0.978
FGFBP1	-6.86	12	-1.31	0.0946	1332	0.961	0.905	16598	0.978
PPARGC1B	-6.86	12	-1.31	0.0946	1333	0.961	0.905	16597	0.978
ASB12	-5.94	9	-1.31	0.0946	1334	0.961	0.905	16596	0.978
MAPK1IP1L	-6.86	12	-1.31	0.0947	1335	0.961	0.905	16595	0.978
WNT16	-6.26	10	-1.31	0.0947	1336	0.961	0.905	16594	0.978
ABCB4	-6.86	12	-1.31	0.0947	1337	0.961	0.905	16593	0.978
PLEKHG3	-6.86	12	-1.31	0.0948	1338	0.961	0.905	16592	0.978
KCTD4	-6.85	12	-1.31	0.0948	1339	0.961	0.905	16591	0.978
FOXR2	-6.85	12	-1.31	0.0951	1340	0.961	0.905	16590	0.978
REC8	-6.85	12	-1.31	0.0951	1341	0.961	0.905	16589	0.978
FAM150A	-6.84	12	-1.31	0.0952	1342	0.961	0.905	16588	0.978
KRT3	-6.84	12	-1.31	0.0953	1343	0.961	0.905	16587	0.978
SERTAD4	-6.84	12	-1.31	0.0954	1344	0.961	0.905	16586	0.978
OPN5	-6.84	12	-1.31	0.0954	1345	0.961	0.905	16585	0.978
MAP1B	-6.83	12	-1.31	0.0955	1346	0.961	0.904	16584	0.978
THBS1	-6.83	12	-1.31	0.0956	1347	0.961	0.904	16583	0.978
C1orf35	-6.83	12	-1.31	0.0957	1348	0.961	0.904	16582	0.978
OR10P1	-6.83	12	-1.31	0.0957	1349	0.961	0.904	16581	0.978
FBXO5	-6.83	12	-1.31	0.0957	1350	0.961	0.904	16580	0.978
GAREML	-6.83	12	-1.31	0.0958	1351	0.961	0.904	16579	0.978
GGCX	-6.82	12	-1.31	0.0959	1352	0.961	0.904	16578	0.978
NDUFB2	-6.82	12	-1.3	0.096	1353	0.961	0.904	16577	0.978
DAP3	-6.82	12	-1.3	0.0961	1354	0.961	0.904	16576	0.978
GLS2	-6.82	12	-1.3	0.0962	1355	0.961	0.904	16575	0.978
ZNF212	-6.81	12	-1.3	0.0963	1356	0.961	0.904	16574	0.978
VIL1	-6.81	12	-1.3	0.0964	1357	0.961	0.904	16573	0.977
CLRN2	-6.81	12	-1.3	0.0966	1358	0.961	0.903	16572	0.977
PPP1R21	-6.81	12	-1.3	0.0966	1359	0.961	0.903	16571	0.977
ARHGEF7	-6.8	12	-1.3	0.0969	1360	0.961	0.903	16570	0.977
SERTM1	-6.79	12	-1.3	0.0972	1361	0.961	0.903	16569	0.977
PTGR2	-6.78	12	-1.3	0.0975	1362	0.961	0.902	16568	0.977
C1QTNF2	-6.78	12	-1.3	0.0976	1363	0.961	0.902	16567	0.977
MTUS1	-6.78	12	-1.29	0.0977	1364	0.961	0.902	16566	0.977
SLITRK2	-6.78	12	-1.29	0.0978	1365	0.961	0.902	16565	0.977
HSCB	-6.77	12	-1.29	0.0978	1366	0.961	0.902	16564	0.977
CHRNB3	-6.77	12	-1.29	0.0978	1367	0.961	0.902	16563	0.977
EHD3	-6.77	12	-1.29	0.0978	1368	0.961	0.902	16562	0.977
NFATC4	-6.77	12	-1.29	0.0978	1369	0.961	0.902	16561	0.977
G3BP1	-6.77	12	-1.29	0.0979	1370	0.961	0.902	16560	0.977
EXOC5	-6.77	12	-1.29	0.0981	1371	0.961	0.902	16559	0.976
LIN9	-6.77	12	-1.29	0.0981	1372	0.961	0.902	16558	0.976
CMTM2	-6.76	12	-1.29	0.0982	1373	0.961	0.902	16557	0.976
HIST1H1D	-6.76	12	-1.29	0.0984	1374	0.961	0.902	16556	0.976
PDX1	-6.76	12	-1.29	0.0984	1375	0.961	0.902	16555	0.976
TXN2	-6.76	12	-1.29	0.0985	1376	0.961	0.902	16554	0.976
SLAMF9	-6.76	12	-1.29	0.0985	1377	0.961	0.902	16553	0.976
CCDC104	-6.76	12	-1.29	0.0985	1378	0.961	0.902	16552	0.976
SLCO4A1	-6.75	12	-1.29	0.0986	1379	0.961	0.901	16551	0.976
SLC4A8	-6.75	12	-1.29	0.0987	1380	0.961	0.901	16550	0.976
IRF2BP2	-6.75	12	-1.29	0.0988	1381	0.961	0.901	16549	0.976
SPDYA	-6.74	12	-1.29	0.0989	1382	0.961	0.901	16548	0.976
FANCA	-6.74	12	-1.29	0.0989	1383	0.961	0.901	16547	0.976
UBQLNL	-6.74	12	-1.29	0.099	1384	0.961	0.901	16546	0.976
ZEB1	-6.74	12	-1.29	0.0991	1385	0.961	0.901	16545	0.976
GALNT8	-6.74	12	-1.29	0.0991	1386	0.961	0.901	16544	0.976
OR11A1	-6.74	12	-1.29	0.0992	1387	0.961	0.901	16543	0.976
ASXL1	-6.73	12	-1.29	0.0993	1388	0.961	0.901	16542	0.976
ATMIN	-6.73	12	-1.29	0.0993	1389	0.961	0.901	16541	0.976
CARD6	-6.73	12	-1.28	0.0994	1390	0.961	0.901	16540	0.976
SLC30A3	-6.73	12	-1.28	0.0995	1391	0.961	0.9	16539	0.976
AASS	-6.73	12	-1.28	0.0995	1392	0.961	0.9	16538	0.976
FAM188B	-6.72	12	-1.28	0.0997	1393	0.961	0.9	16537	0.976
GJA3	-6.72	12	-1.28	0.0997	1394	0.961	0.9	16536	0.976
ORC6	-6.72	12	-1.28	0.0998	1395	0.961	0.9	16535	0.976
SLC35A4	-6.72	12	-1.28	0.0998	1396	0.961	0.9	16534	0.976
RCN1	-6.72	12	-1.28	0.1	1397	0.961	0.9	16533	0.976
DOPEY1	-6.71	12	-1.28	0.1	1398	0.961	0.9	16532	0.976
KCNE1L	-6.71	12	-1.28	0.1	1399	0.961	0.9	16531	0.976
AP3B2	-6.7	12	-1.28	0.101	1400	0.961	0.899	16530	0.975
ZC3H15	-6.7	12	-1.28	0.101	1401	0.961	0.899	16529	0.975
ST3GAL5	-6.7	12	-1.28	0.101	1402	0.961	0.899	16528	0.975
UBXN10	-6.7	12	-1.28	0.101	1403	0.961	0.899	16527	0.975
RPA3	-6.69	12	-1.28	0.101	1404	0.961	0.899	16526	0.975
KAT8	-6.11	10	-1.28	0.101	1405	0.961	0.899	16525	0.975
SH3GL3	-6.69	12	-1.28	0.101	1406	0.961	0.899	16524	0.975
FAM20C	-6.69	12	-1.28	0.101	1407	0.961	0.899	16523	0.975
TMEM63B	-6.68	12	-1.27	0.101	1408	0.961	0.899	16522	0.975
FAM135B	-6.68	12	-1.27	0.101	1409	0.961	0.899	16521	0.975
AP003774.4	-6.68	12	-1.27	0.101	1410	0.961	0.899	16520	0.975
PAK7	-6.68	12	-1.27	0.102	1411	0.961	0.898	16519	0.975
SLC25A26	-6.67	12	-1.27	0.102	1412	0.961	0.898	16518	0.975
LOXL3	-6.67	12	-1.27	0.102	1413	0.961	0.898	16517	0.975
TMX2	-6.67	12	-1.27	0.102	1414	0.961	0.898	16516	0.975
SUMO2	-3.33	3	-1.27	0.102	1415	0.961	0.898	16515	0.975
AOAH	-6.66	12	-1.27	0.102	1416	0.961	0.898	16514	0.975
ITGB4	-6.66	12	-1.27	0.102	1417	0.961	0.898	16513	0.975
ITGB7	-6.66	12	-1.27	0.102	1418	0.961	0.898	16512	0.975
CCL20	-6.65	12	-1.27	0.103	1419	0.961	0.897	16511	0.974
COX4I2	-6.65	12	-1.27	0.103	1420	0.961	0.897	16510	0.974
NCF1	-6.65	12	-1.27	0.103	1421	0.961	0.897	16509	0.974
C9orf66	-6.65	12	-1.27	0.103	1422	0.961	0.897	16508	0.974
C14orf180	-6.64	12	-1.27	0.103	1423	0.961	0.897	16507	0.974
CNTN5	-6.64	12	-1.27	0.103	1424	0.961	0.897	16506	0.974
CALM1	-6.64	12	-1.27	0.103	1425	0.961	0.897	16505	0.974
SRSF4	-6.64	12	-1.26	0.103	1426	0.961	0.897	16504	0.974
NID2	-6.63	12	-1.26	0.103	1427	0.961	0.897	16503	0.974
GJB5	-6.63	12	-1.26	0.103	1428	0.961	0.897	16502	0.974
SREBF2	-6.63	12	-1.26	0.103	1429	0.961	0.897	16501	0.974
ID1	-6.63	12	-1.26	0.103	1430	0.961	0.897	16500	0.974
PTK2B	-6.63	12	-1.26	0.103	1431	0.961	0.897	16499	0.974
SIGLEC11	-6.63	12	-1.26	0.103	1432	0.961	0.897	16498	0.974
RAPGEF3	-6.63	12	-1.26	0.103	1433	0.961	0.897	16497	0.974
DNAJC5	-6.62	12	-1.26	0.104	1434	0.961	0.896	16496	0.974
LMAN1L	-6.62	12	-1.26	0.104	1435	0.961	0.896	16495	0.974
LacZ	-30.28	251	-1.26	0.104	1436	0.961	0.896	16494	0.974
TOB2	-6.62	12	-1.26	0.104	1437	0.961	0.896	16493	0.974
MROH6	-6.62	12	-1.26	0.104	1438	0.961	0.896	16492	0.974
FAM49B	-6.62	12	-1.26	0.104	1439	0.961	0.896	16491	0.974
BRAT1	-6.62	12	-1.26	0.104	1440	0.961	0.896	16490	0.974
MS4A3	-6.62	12	-1.26	0.104	1441	0.961	0.896	16489	0.974
PCDHGA11	-6.62	12	-1.26	0.104	1442	0.961	0.896	16488	0.974
CYCS	-3.31	3	-1.26	0.104	1443	0.961	0.896	16487	0.974
ERAS	-6.61	12	-1.26	0.104	1444	0.961	0.896	16486	0.974
MRPS18A	-6.61	12	-1.26	0.104	1445	0.961	0.896	16485	0.974
USP15	-6.61	12	-1.26	0.104	1446	0.961	0.896	16484	0.974
PEX5	-6.61	12	-1.26	0.104	1447	0.961	0.896	16483	0.974
DOC2B	-6.61	12	-1.26	0.104	1448	0.961	0.896	16482	0.974
ZNF449	-6.61	12	-1.26	0.104	1449	0.961	0.896	16481	0.974
C15orf39	-6.61	12	-1.26	0.104	1450	0.961	0.896	16480	0.974
TLX3	-6.61	12	-1.26	0.104	1451	0.961	0.896	16479	0.974
LMAN1	-6.6	12	-1.26	0.104	1452	0.961	0.896	16478	0.974
MEF2D	-6.6	12	-1.26	0.104	1453	0.961	0.896	16477	0.974
RFC3	-6.6	12	-1.26	0.104	1454	0.961	0.896	16476	0.974
MTG2	-6.6	12	-1.26	0.105	1455	0.961	0.895	16475	0.974
PI15	-6.6	12	-1.26	0.105	1456	0.961	0.895	16474	0.974
MAP7D2	-6.6	12	-1.26	0.105	1457	0.961	0.895	16473	0.974
SLPI	-6.6	12	-1.26	0.105	1458	0.961	0.895	16472	0.974
MEDAG	-6.6	12	-1.26	0.105	1459	0.961	0.895	16471	0.974
OR10W1	-6.59	12	-1.25	0.105	1460	0.961	0.895	16470	0.974
ZFR2	-6.59	12	-1.25	0.105	1461	0.961	0.895	16469	0.974
PIGQ	-6.59	12	-1.25	0.105	1462	0.961	0.895	16468	0.974
VCAN	-6.59	12	-1.25	0.105	1463	0.961	0.895	16467	0.974
DTNB	-6.58	12	-1.25	0.105	1464	0.961	0.895	16466	0.974
DERL1	-6.58	12	-1.25	0.105	1465	0.961	0.895	16465	0.974
ASZ1	-6.58	12	-1.25	0.105	1466	0.961	0.895	16464	0.974
IQCK	-6.58	12	-1.25	0.105	1467	0.961	0.895	16463	0.974
CD1C	-6.58	12	-1.25	0.105	1468	0.961	0.895	16462	0.974
C1orf186	-6.57	12	-1.25	0.106	1469	0.961	0.894	16461	0.974
GAL3ST3	-6.57	12	-1.25	0.106	1470	0.961	0.894	16460	0.974
PCDHA10	-6.57	12	-1.25	0.106	1471	0.961	0.894	16459	0.974
SP7	-6.57	12	-1.25	0.106	1472	0.961	0.894	16458	0.974
PRPS1	-6.57	12	-1.25	0.106	1473	0.961	0.894	16457	0.974
RNF148	-6.57	12	-1.25	0.106	1474	0.961	0.894	16456	0.974
SLC17A9	-6.56	12	-1.25	0.106	1475	0.961	0.894	16455	0.974
ZBTB3	-6.56	12	-1.25	0.106	1476	0.961	0.894	16454	0.974
FBXL6	-6.56	12	-1.25	0.106	1477	0.961	0.894	16453	0.974
DHX16	-6.56	12	-1.25	0.106	1478	0.961	0.894	16452	0.974
F2RL1	-6.56	12	-1.25	0.106	1479	0.961	0.894	16451	0.974
PHF10	-6.56	12	-1.25	0.106	1480	0.961	0.894	16450	0.974
MAP4K4	-6.55	12	-1.25	0.106	1481	0.961	0.894	16449	0.974
USP34	-6.55	12	-1.25	0.106	1482	0.961	0.894	16448	0.974
PNRC1	-6.55	12	-1.25	0.106	1483	0.961	0.894	16447	0.974
EVA1A	-6.27	11	-1.24	0.107	1484	0.961	0.893	16446	0.974
KNOP1	-6.55	12	-1.24	0.107	1485	0.961	0.893	16445	0.974
GSTM2	-6.54	12	-1.24	0.107	1486	0.961	0.893	16444	0.974
RAMP2	-6.54	12	-1.24	0.107	1487	0.961	0.893	16443	0.974
GPN1	-6.54	12	-1.24	0.107	1488	0.961	0.893	16442	0.974
INTS1	-6.54	12	-1.24	0.107	1489	0.961	0.893	16441	0.974
EPB41L5	-6.54	12	-1.24	0.107	1490	0.961	0.893	16440	0.974
PSD2	-6.53	12	-1.24	0.107	1491	0.961	0.893	16439	0.974
TLR3	-6.53	12	-1.24	0.107	1492	0.961	0.893	16438	0.974
KCTD3	-6.53	12	-1.24	0.107	1493	0.961	0.893	16437	0.974
FLNC	-6.53	12	-1.24	0.107	1494	0.961	0.893	16436	0.974
FAM161A	-6.53	12	-1.24	0.107	1495	0.961	0.893	16435	0.974
PNPO	-6.53	12	-1.24	0.107	1496	0.961	0.893	16434	0.974
CENPI	-6.53	12	-1.24	0.107	1497	0.961	0.893	16433	0.974
TRIM4	-6.53	12	-1.24	0.107	1498	0.961	0.893	16432	0.974
PTPN23	-6.53	12	-1.24	0.107	1499	0.961	0.893	16431	0.974
NDC1	-6.53	12	-1.24	0.107	1500	0.961	0.893	16430	0.974
CXorf66	-6.53	12	-1.24	0.107	1501	0.961	0.893	16429	0.974
AIP	-6.53	12	-1.24	0.107	1502	0.961	0.893	16428	0.974
CDC25C	-6.52	12	-1.24	0.108	1503	0.961	0.892	16427	0.974
WFDC8	-6.52	12	-1.24	0.108	1504	0.961	0.892	16426	0.974
RTN4RL1	-6.52	12	-1.24	0.108	1505	0.961	0.892	16425	0.974
PNPLA6	-6.52	12	-1.24	0.108	1506	0.961	0.892	16424	0.974
NUDT22	-6.52	12	-1.24	0.108	1507	0.961	0.892	16423	0.974
DDX56	-6.52	12	-1.24	0.108	1508	0.961	0.892	16422	0.974
SNX12	-6.52	12	-1.24	0.108	1509	0.961	0.892	16421	0.974
PPCDC	-6.51	12	-1.24	0.108	1510	0.961	0.892	16420	0.974
SALL2	-6.51	12	-1.24	0.108	1511	0.961	0.892	16419	0.974
POMC	-6.51	12	-1.24	0.108	1512	0.961	0.892	16418	0.974
CLDN12	-6.51	12	-1.24	0.108	1513	0.961	0.892	16417	0.974
TSN	-6.51	12	-1.24	0.108	1514	0.961	0.892	16416	0.974
TSPYL1	-6.5	12	-1.24	0.108	1515	0.961	0.892	16415	0.974
TNFSF11	-6.5	12	-1.23	0.109	1516	0.961	0.891	16414	0.974
PPP2R5B	-6.49	12	-1.23	0.109	1517	0.961	0.891	16413	0.973
STMN2	-6.49	12	-1.23	0.109	1518	0.961	0.891	16412	0.973
CBLL1	-6.49	12	-1.23	0.109	1519	0.961	0.891	16411	0.973
DYNC1H1	-6.49	12	-1.23	0.109	1520	0.961	0.891	16410	0.973
EPHB2	-6.49	12	-1.23	0.109	1521	0.961	0.891	16409	0.973
AUP1	-6.49	12	-1.23	0.109	1522	0.961	0.891	16408	0.973
RECQL	-6.48	12	-1.23	0.109	1523	0.961	0.891	16407	0.973
PDCD10	-6.48	12	-1.23	0.109	1524	0.961	0.891	16406	0.973
TUBGCP3	-6.48	12	-1.23	0.109	1525	0.961	0.891	16405	0.973
HIGD2A	-6.47	12	-1.23	0.11	1526	0.961	0.89	16404	0.973
ZNF263	-6.47	12	-1.23	0.11	1527	0.961	0.89	16403	0.973
H2BFM	-6.46	12	-1.23	0.11	1528	0.961	0.89	16402	0.973
ZNF629	-5.6	9	-1.23	0.11	1529	0.961	0.89	16401	0.973
AKIRIN2	-6.46	12	-1.23	0.11	1530	0.961	0.89	16400	0.973
ESYT1	-6.46	12	-1.23	0.11	1531	0.961	0.89	16399	0.973
CHST11	-6.46	12	-1.23	0.11	1532	0.961	0.89	16398	0.973
MCCD1	-6.46	12	-1.23	0.11	1533	0.961	0.89	16397	0.973
GPR180	-6.46	12	-1.23	0.11	1534	0.961	0.89	16396	0.973
IMMT	-6.46	12	-1.22	0.11	1535	0.961	0.89	16395	0.973
ZNF683	-6.45	12	-1.22	0.11	1536	0.961	0.89	16394	0.973
MOK	-6.45	12	-1.22	0.11	1537	0.961	0.89	16393	0.973
AS3MT	-6.45	12	-1.22	0.11	1538	0.961	0.89	16392	0.973
SH3BGRL3	-5.58	9	-1.22	0.111	1539	0.961	0.889	16391	0.973
CALCR	-6.45	12	-1.22	0.111	1540	0.961	0.889	16390	0.973
FAM35A	-6.45	12	-1.22	0.111	1541	0.961	0.889	16389	0.973
ZNF133	-6.45	12	-1.22	0.111	1542	0.961	0.889	16388	0.973
CD247	-6.45	12	-1.22	0.111	1543	0.961	0.889	16387	0.973
MZB1	-6.45	12	-1.22	0.111	1544	0.961	0.889	16386	0.973
HINT1	-6.44	12	-1.22	0.111	1545	0.961	0.889	16385	0.973
SPERT	-6.44	12	-1.22	0.111	1546	0.961	0.889	16384	0.973
CCDC122	-5.58	9	-1.22	0.111	1547	0.961	0.889	16383	0.973
NOTO	-6.44	12	-1.22	0.111	1548	0.961	0.889	16382	0.973
TSPAN32	-6.44	12	-1.22	0.111	1549	0.961	0.889	16381	0.973
ATP6V1B1	-6.44	12	-1.22	0.111	1550	0.961	0.889	16380	0.973
CLDN4	-6.44	12	-1.22	0.111	1551	0.961	0.889	16379	0.973
MAP3K8	-6.44	12	-1.22	0.111	1552	0.961	0.889	16378	0.973
SPOP	-6.44	12	-1.22	0.111	1553	0.961	0.889	16377	0.973
UBAP2L	-6.43	12	-1.22	0.111	1554	0.961	0.889	16376	0.973
DNASE1L2	-6.43	12	-1.22	0.111	1555	0.961	0.889	16375	0.973
CMIP	-6.43	12	-1.22	0.111	1556	0.961	0.889	16374	0.973
LAMC3	-6.43	12	-1.22	0.111	1557	0.961	0.889	16373	0.973
KCNH3	-6.43	12	-1.22	0.112	1558	0.961	0.888	16372	0.973
ATP6V0B	-6.42	12	-1.22	0.112	1559	0.961	0.888	16371	0.973
OR6C76	-6.42	12	-1.22	0.112	1560	0.961	0.888	16370	0.973
COASY	-6.42	12	-1.22	0.112	1561	0.961	0.888	16369	0.973
LARS2	-6.42	12	-1.22	0.112	1562	0.961	0.888	16368	0.973
IFNGR1	-6.41	12	-1.22	0.112	1563	0.961	0.888	16367	0.973
NEDD8	-5.55	9	-1.22	0.112	1564	0.961	0.888	16366	0.973
SPATC1L	-6.41	12	-1.22	0.112	1565	0.961	0.888	16365	0.973
MOCS3	-6.41	12	-1.21	0.112	1566	0.961	0.888	16364	0.973
SFPQ	-6.41	12	-1.21	0.112	1567	0.961	0.888	16363	0.973
OVCH1	-6.41	12	-1.21	0.112	1568	0.961	0.888	16362	0.973
SLC33A1	-6.4	12	-1.21	0.113	1569	0.961	0.887	16361	0.973
SIX3	-6.4	12	-1.21	0.113	1570	0.961	0.887	16360	0.973
IK	-6.4	12	-1.21	0.113	1571	0.961	0.887	16359	0.973
PROB1	-6.39	12	-1.21	0.113	1572	0.961	0.887	16358	0.972
DLAT	-6.39	12	-1.21	0.113	1573	0.961	0.887	16357	0.972
ST8SIA2	-6.39	12	-1.21	0.113	1574	0.961	0.887	16356	0.972
HEATR4	-6.39	12	-1.21	0.113	1575	0.961	0.887	16355	0.972
ANKRD23	-6.39	12	-1.21	0.113	1576	0.961	0.887	16354	0.972
CPVL	-6.39	12	-1.21	0.113	1577	0.961	0.887	16353	0.972
SLC43A3	-6.39	12	-1.21	0.113	1578	0.961	0.887	16352	0.972
KIF22	-6.39	12	-1.21	0.113	1579	0.961	0.887	16351	0.972
NAALADL1	-6.39	12	-1.21	0.113	1580	0.961	0.887	16350	0.972
SLCO2B1	-6.39	12	-1.21	0.113	1581	0.961	0.887	16349	0.972
MAB21L1	-6.39	12	-1.21	0.113	1582	0.961	0.887	16348	0.972
AAK1	-6.39	12	-1.21	0.113	1583	0.961	0.887	16347	0.972
NECAB1	-6.38	12	-1.21	0.113	1584	0.961	0.887	16346	0.972
DPT	-6.38	12	-1.21	0.113	1585	0.961	0.887	16345	0.972
AKIP1	-6.37	12	-1.21	0.114	1586	0.961	0.886	16344	0.972
ATP6AP1	-6.37	12	-1.21	0.114	1587	0.961	0.886	16343	0.972
AKIRIN1	-6.37	12	-1.21	0.114	1588	0.961	0.886	16342	0.972
PLEKHG5	-6.37	12	-1.21	0.114	1589	0.961	0.886	16341	0.972
TAS1R3	-6.37	12	-1.21	0.114	1590	0.961	0.886	16340	0.972
AAR2	-6.37	12	-1.21	0.114	1591	0.961	0.886	16339	0.972
ORC4	-6.37	12	-1.21	0.114	1592	0.961	0.886	16338	0.972
RFX4	-6.37	12	-1.21	0.114	1593	0.961	0.886	16337	0.972
TRHR	-6.36	12	-1.2	0.114	1594	0.961	0.886	16336	0.972
DEXI	-6.36	12	-1.2	0.114	1595	0.961	0.886	16335	0.972
CACUL1	-6.36	12	-1.2	0.114	1596	0.961	0.886	16334	0.972
BEAN1	-6.36	12	-1.2	0.114	1597	0.961	0.886	16333	0.972
IFT88	-6.36	12	-1.2	0.114	1598	0.961	0.886	16332	0.972
AP5B1	-6.36	12	-1.2	0.114	1599	0.961	0.886	16331	0.972
ZC4H2	-6.36	12	-1.2	0.114	1600	0.961	0.886	16330	0.972
2021-09-01	-6.36	12	-1.2	0.114	1601	0.961	0.886	16329	0.972
NAT16	-6.35	12	-1.2	0.115	1602	0.961	0.885	16328	0.972
AMOTL1	-6.35	12	-1.2	0.115	1603	0.961	0.885	16327	0.972
SMIM18	-6.35	12	-1.2	0.115	1604	0.961	0.885	16326	0.972
ATP4B	-6.35	12	-1.2	0.115	1605	0.961	0.885	16325	0.972
MRPS11	-6.34	12	-1.2	0.115	1606	0.961	0.885	16324	0.972
CYLD	-6.34	12	-1.2	0.115	1607	0.961	0.885	16323	0.972
SNX29	-6.34	12	-1.2	0.115	1608	0.961	0.885	16322	0.972
FKBP3	-6.34	12	-1.2	0.115	1609	0.961	0.885	16321	0.972
SMARCAD1	-6.34	12	-1.2	0.115	1610	0.961	0.885	16320	0.972
CYP4Z1	-6.34	12	-1.2	0.115	1611	0.961	0.885	16319	0.972
RASGRF2	-6.34	12	-1.2	0.115	1612	0.961	0.885	16318	0.972
FTO	-6.34	12	-1.2	0.115	1613	0.961	0.885	16317	0.972
PNPT1	-6.34	12	-1.2	0.115	1614	0.961	0.885	16316	0.972
RAB13	-6.33	12	-1.2	0.115	1615	0.961	0.885	16315	0.972
CPB2	-6.33	12	-1.2	0.115	1616	0.961	0.885	16314	0.972
MTL5	-6.33	12	-1.2	0.116	1617	0.961	0.884	16313	0.972
CNNM3	-5.48	9	-1.2	0.116	1618	0.961	0.884	16312	0.972
PRDM15	-6.33	12	-1.2	0.116	1619	0.961	0.884	16311	0.972
MATN4	-6.32	12	-1.2	0.116	1620	0.961	0.884	16310	0.972
KIAA0391	-5.77	10	-1.2	0.116	1621	0.961	0.884	16309	0.972
RSBN1L	-6.32	12	-1.19	0.116	1622	0.961	0.884	16308	0.972
SH3RF2	-6.32	12	-1.19	0.116	1623	0.961	0.884	16307	0.972
TNFSF15	-6.31	12	-1.19	0.116	1624	0.961	0.884	16306	0.972
PIN4	-6.31	12	-1.19	0.116	1625	0.961	0.884	16305	0.972
VIMP	-6.31	12	-1.19	0.116	1626	0.961	0.884	16304	0.972
TMX3	-6.31	12	-1.19	0.116	1627	0.961	0.884	16303	0.972
MRPL2	-6.31	12	-1.19	0.116	1628	0.961	0.884	16302	0.972
CDC7	-6.31	12	-1.19	0.116	1629	0.961	0.884	16301	0.972
ZNF143	-6.31	12	-1.19	0.117	1630	0.961	0.883	16300	0.972
ABCA6	-6.3	12	-1.19	0.117	1631	0.961	0.883	16299	0.972
SRSF1	-5.75	10	-1.19	0.117	1632	0.961	0.883	16298	0.972
BEND3	-6.3	12	-1.19	0.117	1633	0.961	0.883	16297	0.972
RIPK1	-6.3	12	-1.19	0.117	1634	0.961	0.883	16296	0.972
GCSH	-6.3	12	-1.19	0.117	1635	0.961	0.883	16295	0.972
TCOF1	-6.3	12	-1.19	0.117	1636	0.961	0.883	16294	0.972
GGACT	-6.3	12	-1.19	0.117	1637	0.961	0.883	16293	0.972
AGPAT2	-6.3	12	-1.19	0.117	1638	0.961	0.883	16292	0.972
TMEM63C	-6.3	12	-1.19	0.117	1639	0.961	0.883	16291	0.972
ATP2A2	-6.3	12	-1.19	0.117	1640	0.961	0.883	16290	0.972
MAP1LC3A	-6.3	12	-1.19	0.117	1641	0.961	0.883	16289	0.972
APLNR	-6.3	12	-1.19	0.117	1642	0.961	0.883	16288	0.972
HSD17B3	-6.3	12	-1.19	0.117	1643	0.961	0.883	16287	0.972
RABGGTB	-6.29	12	-1.19	0.117	1644	0.961	0.883	16286	0.972
PLAGL2	-6.29	12	-1.19	0.117	1645	0.961	0.883	16285	0.972
TREML4	-6.29	12	-1.19	0.117	1646	0.961	0.883	16284	0.972
PELP1	-6.29	12	-1.19	0.117	1647	0.961	0.883	16283	0.972
S100A16	-6.29	12	-1.19	0.117	1648	0.961	0.883	16282	0.972
MALL	-6.29	12	-1.19	0.117	1649	0.961	0.883	16281	0.972
SENP8	-5.44	9	-1.19	0.117	1650	0.961	0.883	16280	0.972
SGOL1	-6.28	12	-1.19	0.118	1651	0.961	0.882	16279	0.972
POM121L2	-6.28	12	-1.19	0.118	1652	0.961	0.882	16278	0.972
PCMT1	-6.28	12	-1.19	0.118	1653	0.961	0.882	16277	0.972
PARK7	-6.28	12	-1.19	0.118	1654	0.961	0.882	16276	0.972
PLK1	-6.01	11	-1.19	0.118	1655	0.961	0.882	16275	0.972
WIPF3	-6.27	12	-1.19	0.118	1656	0.961	0.882	16274	0.972
CREB1	-6.27	12	-1.19	0.118	1657	0.961	0.882	16273	0.972
GPR182	-6.27	12	-1.18	0.118	1658	0.961	0.882	16272	0.972
CSNK2A1	-5.43	9	-1.18	0.118	1659	0.961	0.882	16271	0.972
REEP1	-6.27	12	-1.18	0.118	1660	0.961	0.882	16270	0.972
CNP	-6.27	12	-1.18	0.118	1661	0.961	0.882	16269	0.972
RNASEH2B	-6.27	12	-1.18	0.118	1662	0.961	0.882	16268	0.972
TRAF7	-6.27	12	-1.18	0.118	1663	0.961	0.882	16267	0.972
PRICKLE1	-6.27	12	-1.18	0.118	1664	0.961	0.882	16266	0.972
METTL2B	-3.13	3	-1.18	0.118	1665	0.961	0.882	16265	0.972
C7orf10	-6.26	12	-1.18	0.119	1666	0.961	0.881	16264	0.972
AGO2	-6.26	12	-1.18	0.119	1667	0.961	0.881	16263	0.972
SMARCD1	-6.26	12	-1.18	0.119	1668	0.961	0.881	16262	0.972
SEPHS1	-6.26	12	-1.18	0.119	1669	0.961	0.881	16261	0.972
CLEC4F	-6.26	12	-1.18	0.119	1670	0.961	0.881	16260	0.972
FCRLB	-6.26	12	-1.18	0.119	1671	0.961	0.881	16259	0.972
DCAF16	-6.26	12	-1.18	0.119	1672	0.961	0.881	16258	0.972
SUSD5	-6.25	12	-1.18	0.119	1673	0.961	0.881	16257	0.972
PHF12	-6.25	12	-1.18	0.119	1674	0.961	0.881	16256	0.972
AASDHPPT	-6.25	12	-1.18	0.119	1675	0.961	0.881	16255	0.972
MYCBPAP	-6.25	12	-1.18	0.119	1676	0.961	0.881	16254	0.972
EEF1E1	-6.25	12	-1.18	0.119	1677	0.961	0.881	16253	0.972
ZNF706	-6.24	12	-1.18	0.119	1678	0.961	0.881	16252	0.972
COMMD1	-6.24	12	-1.18	0.119	1679	0.961	0.881	16251	0.972
RAB31	-6.24	12	-1.18	0.119	1680	0.961	0.881	16250	0.972
GSDMD	-6.24	12	-1.18	0.119	1681	0.961	0.881	16249	0.972
CYP19A1	-6.24	12	-1.18	0.119	1682	0.961	0.881	16248	0.972
HRAS	-6.24	12	-1.18	0.119	1683	0.961	0.881	16247	0.972
KHK	-6.23	12	-1.18	0.12	1684	0.961	0.88	16246	0.971
PCDHB7	-6.23	12	-1.18	0.12	1685	0.961	0.88	16245	0.971
ARFGEF2	-6.23	12	-1.17	0.12	1686	0.961	0.88	16244	0.971
ADAMTS20	-6.22	12	-1.17	0.12	1687	0.961	0.88	16243	0.971
RAI2	-6.22	12	-1.17	0.12	1688	0.961	0.88	16242	0.971
NLN	-6.22	12	-1.17	0.12	1689	0.961	0.88	16241	0.971
GJB3	-6.22	12	-1.17	0.12	1690	0.961	0.88	16240	0.971
IRF9	-6.22	12	-1.17	0.12	1691	0.961	0.88	16239	0.971
SMG6	-6.21	12	-1.17	0.121	1692	0.961	0.879	16238	0.971
STIM1	-6.21	12	-1.17	0.121	1693	0.961	0.879	16237	0.971
CPO	-5.37	9	-1.17	0.121	1694	0.961	0.879	16236	0.971
ZNF398	-6.2	12	-1.17	0.121	1695	0.961	0.879	16235	0.971
SCYL3	-6.2	12	-1.17	0.121	1696	0.961	0.879	16234	0.971
INTS10	-6.2	12	-1.17	0.121	1697	0.961	0.879	16233	0.971
NOBOX	-6.2	12	-1.17	0.121	1698	0.961	0.879	16232	0.971
CITED2	-6.2	12	-1.17	0.121	1699	0.961	0.879	16231	0.971
NFYA	-6.2	12	-1.17	0.121	1700	0.961	0.879	16230	0.971
PRMT7	-6.2	12	-1.17	0.121	1701	0.961	0.879	16229	0.971
TCEAL5	-6.19	12	-1.17	0.122	1702	0.961	0.878	16228	0.971
GCM1	-6.19	12	-1.17	0.122	1703	0.961	0.878	16227	0.971
KDM1A	-6.19	12	-1.17	0.122	1704	0.961	0.878	16226	0.97
METTL12	-6.19	12	-1.17	0.122	1705	0.961	0.878	16225	0.97
NCKAP5L	-6.19	12	-1.17	0.122	1706	0.961	0.878	16224	0.97
UBFD1	-6.18	12	-1.17	0.122	1707	0.961	0.878	16223	0.97
GJB2	-6.18	12	-1.17	0.122	1708	0.961	0.878	16222	0.97
TMEM230	-5.64	10	-1.17	0.122	1709	0.961	0.878	16221	0.97
KLKB1	-6.18	12	-1.16	0.122	1710	0.961	0.878	16220	0.97
SRP19	-6.18	12	-1.16	0.122	1711	0.961	0.878	16219	0.97
MMS19	-6.18	12	-1.16	0.122	1712	0.961	0.878	16218	0.97
SUN1	-6.18	12	-1.16	0.122	1713	0.961	0.878	16217	0.97
TSPYL6	-6.18	12	-1.16	0.122	1714	0.961	0.878	16216	0.97
VOPP1	-6.17	12	-1.16	0.122	1715	0.961	0.878	16215	0.97
ZNF384	-6.17	12	-1.16	0.122	1716	0.961	0.878	16214	0.97
RCBTB1	-6.17	12	-1.16	0.122	1717	0.961	0.878	16213	0.97
ST8SIA1	-6.17	12	-1.16	0.122	1718	0.961	0.878	16212	0.97
RAB41	-6.17	12	-1.16	0.122	1719	0.961	0.878	16211	0.97
FBXO2	-6.17	12	-1.16	0.123	1720	0.961	0.877	16210	0.97
GDF3	-6.17	12	-1.16	0.123	1721	0.961	0.877	16209	0.97
CCDC130	-6.17	12	-1.16	0.123	1722	0.961	0.877	16208	0.97
FANCL	-6.16	12	-1.16	0.123	1723	0.961	0.877	16207	0.97
QSER1	-6.16	12	-1.16	0.123	1724	0.961	0.877	16206	0.97
MTCH2	-6.16	12	-1.16	0.123	1725	0.961	0.877	16205	0.97
NAGK	-6.16	12	-1.16	0.123	1726	0.961	0.877	16204	0.97
ARID4A	-6.16	12	-1.16	0.123	1727	0.961	0.877	16203	0.97
SKA3	-6.15	12	-1.16	0.123	1728	0.961	0.877	16202	0.97
SPNS1	-6.15	12	-1.16	0.123	1729	0.961	0.877	16201	0.97
CSMD1	-6.15	12	-1.16	0.123	1730	0.961	0.877	16200	0.97
ZCCHC11	-6.15	12	-1.16	0.123	1731	0.961	0.877	16199	0.97
NME4	-6.15	12	-1.16	0.123	1732	0.961	0.877	16198	0.97
HTR1D	-6.15	12	-1.16	0.123	1733	0.961	0.877	16197	0.97
ZMYM6	-6.15	12	-1.16	0.124	1734	0.961	0.876	16196	0.97
MVB12B	-6.15	12	-1.16	0.124	1735	0.961	0.876	16195	0.97
SCML2	-6.15	12	-1.16	0.124	1736	0.961	0.876	16194	0.97
TNFAIP8L3	-6.14	12	-1.16	0.124	1737	0.961	0.876	16193	0.97
ZSCAN25	-6.14	12	-1.16	0.124	1738	0.961	0.876	16192	0.97
ZNF696	-6.14	12	-1.16	0.124	1739	0.961	0.876	16191	0.97
PROC	-6.14	12	-1.16	0.124	1740	0.961	0.876	16190	0.97
RAB37	-6.14	12	-1.16	0.124	1741	0.961	0.876	16189	0.97
MOSPD2	-6.14	12	-1.16	0.124	1742	0.961	0.876	16188	0.97
RS1	-6.13	12	-1.15	0.124	1743	0.961	0.876	16187	0.97
ARIH1	-6.13	12	-1.15	0.124	1744	0.961	0.876	16186	0.97
MMP9	-6.13	12	-1.15	0.124	1745	0.961	0.876	16185	0.97
C16orf86	-6.13	12	-1.15	0.124	1746	0.961	0.876	16184	0.97
HTR1E	-6.12	12	-1.15	0.125	1747	0.961	0.875	16183	0.97
C18orf63	-6.12	12	-1.15	0.125	1748	0.961	0.875	16182	0.97
IL17D	-6.12	12	-1.15	0.125	1749	0.961	0.875	16181	0.97
CYP2R1	-6.12	12	-1.15	0.125	1750	0.961	0.875	16180	0.97
TMEM223	-6.12	12	-1.15	0.125	1751	0.961	0.875	16179	0.97
CARD9	-6.12	12	-1.15	0.125	1752	0.961	0.875	16178	0.97
NAT8	-6.11	12	-1.15	0.125	1753	0.961	0.875	16177	0.97
SOWAHD	-6.11	12	-1.15	0.125	1754	0.961	0.875	16176	0.97
UBE2Q1	-6.11	12	-1.15	0.125	1755	0.961	0.875	16175	0.97
TMEM184A	-6.11	12	-1.15	0.125	1756	0.961	0.875	16174	0.97
TMLHE	-6.11	12	-1.15	0.125	1757	0.961	0.875	16173	0.97
TEKT4	-6.1	12	-1.15	0.125	1758	0.961	0.875	16172	0.97
ING2	-6.1	12	-1.15	0.126	1759	0.961	0.874	16171	0.97
CLIC2	-6.1	12	-1.15	0.126	1760	0.961	0.874	16170	0.97
DISC1	-6.1	12	-1.15	0.126	1761	0.961	0.874	16169	0.97
C17orf64	-6.1	12	-1.15	0.126	1762	0.961	0.874	16168	0.97
MTF2	-6.1	12	-1.15	0.126	1763	0.961	0.874	16167	0.97
SPATA13	-6.1	12	-1.15	0.126	1764	0.961	0.874	16166	0.97
ACN9	-6.1	12	-1.15	0.126	1765	0.961	0.874	16165	0.97
TSEN54	-5.84	11	-1.15	0.126	1766	0.961	0.874	16164	0.97
FADS1	-6.1	12	-1.15	0.126	1767	0.961	0.874	16163	0.97
SZRD1	-6.1	12	-1.15	0.126	1768	0.961	0.874	16162	0.97
NCOA1	-6.1	12	-1.15	0.126	1769	0.961	0.874	16161	0.97
RNF24	-6.1	12	-1.15	0.126	1770	0.961	0.874	16160	0.97
POLR3E	-6.09	12	-1.15	0.126	1771	0.961	0.874	16159	0.97
PLXNB3	-6.09	12	-1.15	0.126	1772	0.961	0.874	16158	0.97
AMER3	-6.09	12	-1.15	0.126	1773	0.961	0.874	16157	0.97
RFX5	-6.09	12	-1.15	0.126	1774	0.961	0.874	16156	0.97
RNF182	-6.09	12	-1.14	0.126	1775	0.961	0.874	16155	0.97
SHISA2	-6.09	12	-1.14	0.126	1776	0.961	0.874	16154	0.97
FER1L6	-6.08	12	-1.14	0.126	1777	0.961	0.874	16153	0.97
NTRK3	-6.08	12	-1.14	0.126	1778	0.961	0.874	16152	0.97
IL1RAPL1	-6.08	12	-1.14	0.126	1779	0.961	0.874	16151	0.97
LIN54	-6.08	12	-1.14	0.127	1780	0.961	0.873	16150	0.97
TMPRSS3	-6.08	12	-1.14	0.127	1781	0.961	0.873	16149	0.97
ASF1A	-6.08	12	-1.14	0.127	1782	0.961	0.873	16148	0.97
CTF1	-6.08	12	-1.14	0.127	1783	0.961	0.873	16147	0.97
URM1	-6.08	12	-1.14	0.127	1784	0.961	0.873	16146	0.97
CDC6	-5.82	11	-1.14	0.127	1785	0.961	0.873	16145	0.97
DOHH	-6.07	12	-1.14	0.127	1786	0.961	0.873	16144	0.97
MRPS24	-6.07	12	-1.14	0.127	1787	0.961	0.873	16143	0.97
ZNF34	-6.07	12	-1.14	0.127	1788	0.961	0.873	16142	0.97
HSP90AA1	-6.07	12	-1.14	0.127	1789	0.961	0.873	16141	0.97
CCDC173	-6.07	12	-1.14	0.127	1790	0.961	0.873	16140	0.97
MSN	-6.07	12	-1.14	0.127	1791	0.961	0.873	16139	0.97
LZTS3	-6.07	12	-1.14	0.127	1792	0.961	0.873	16138	0.97
C16orf87	-6.06	12	-1.14	0.127	1793	0.961	0.873	16137	0.97
ADAM2	-6.06	12	-1.14	0.127	1794	0.961	0.873	16136	0.97
OSCP1	-6.06	12	-1.14	0.127	1795	0.961	0.873	16135	0.97
PGAM4	-3.03	3	-1.14	0.127	1796	0.961	0.873	16134	0.97
LATS2	-6.06	12	-1.14	0.127	1797	0.961	0.873	16133	0.97
DMTN	-6.06	12	-1.14	0.128	1798	0.961	0.872	16132	0.97
LDLRAP1	-6.06	12	-1.14	0.128	1799	0.961	0.872	16131	0.97
NPPB	-6.05	12	-1.14	0.128	1800	0.961	0.872	16130	0.97
NPAT	-5.79	11	-1.14	0.128	1801	0.961	0.872	16129	0.97
ZNF280A	-6.05	12	-1.14	0.128	1802	0.961	0.872	16128	0.97
OR56A3	-6.05	12	-1.14	0.128	1803	0.961	0.872	16127	0.97
TRNAU1AP	-6.05	12	-1.14	0.128	1804	0.961	0.872	16126	0.97
MAGEB3	-6.05	12	-1.14	0.128	1805	0.961	0.872	16125	0.97
SAP130	-6.05	12	-1.14	0.128	1806	0.961	0.872	16124	0.97
CASQ1	-6.05	12	-1.14	0.128	1807	0.961	0.872	16123	0.97
PCBP4	-6.04	12	-1.13	0.128	1808	0.961	0.872	16122	0.969
ANKRD33	-6.04	12	-1.13	0.128	1809	0.961	0.872	16121	0.969
C1orf162	-6.04	12	-1.13	0.128	1810	0.961	0.872	16120	0.969
CRNN	-6.04	12	-1.13	0.128	1811	0.961	0.872	16119	0.969
GNMT	-6.04	12	-1.13	0.129	1812	0.961	0.871	16118	0.969
VPS39	-6.04	12	-1.13	0.129	1813	0.961	0.871	16117	0.969
GFRA2	-6.03	12	-1.13	0.129	1814	0.961	0.871	16116	0.969
MCHR2	-6.03	12	-1.13	0.129	1815	0.961	0.871	16115	0.969
C17orf51	-6.03	12	-1.13	0.129	1816	0.961	0.871	16114	0.969
MRPL30	-6.03	12	-1.13	0.129	1817	0.961	0.871	16113	0.969
INTS6	-6.02	12	-1.13	0.129	1818	0.961	0.871	16112	0.969
SCARA5	-6.02	12	-1.13	0.129	1819	0.961	0.871	16111	0.969
ZNF785	-6.02	12	-1.13	0.129	1820	0.961	0.871	16110	0.969
C9orf142	-6.02	12	-1.13	0.129	1821	0.961	0.871	16109	0.969
OR9G1	-6.02	12	-1.13	0.129	1822	0.961	0.871	16108	0.969
CLIC1	-6.01	12	-1.13	0.13	1823	0.961	0.87	16107	0.969
MACROD1	-6.01	12	-1.13	0.13	1824	0.961	0.87	16106	0.969
GPR20	-6.01	12	-1.13	0.13	1825	0.961	0.87	16105	0.969
ANKRD32	-6.01	12	-1.13	0.13	1826	0.961	0.87	16104	0.969
CDHR3	-6.01	12	-1.13	0.13	1827	0.961	0.87	16103	0.969
GKN1	-6.01	12	-1.13	0.13	1828	0.961	0.87	16102	0.969
CD52	-5.2	9	-1.13	0.13	1829	0.961	0.87	16101	0.969
SRRM2	-6.01	12	-1.13	0.13	1830	0.961	0.87	16100	0.969
CLDN2	-6.01	12	-1.13	0.13	1831	0.961	0.87	16099	0.969
2021-03-03	-6.01	12	-1.13	0.13	1832	0.961	0.87	16098	0.969
SNN	-6.01	12	-1.13	0.13	1833	0.961	0.87	16097	0.969
ARFGAP2	-6.01	12	-1.13	0.13	1834	0.961	0.87	16096	0.969
FAM198A	-6	12	-1.13	0.13	1835	0.961	0.87	16095	0.969
KIAA1522	-6	12	-1.13	0.13	1836	0.961	0.87	16094	0.969
HIVEP3	-6	12	-1.13	0.13	1837	0.961	0.87	16093	0.969
WFS1	-5.2	9	-1.13	0.13	1838	0.961	0.87	16092	0.969
APOOL	-6	12	-1.13	0.13	1839	0.961	0.87	16091	0.969
RAB5B	-6	12	-1.13	0.13	1840	0.961	0.87	16090	0.969
AGPAT6	-6	12	-1.12	0.13	1841	0.961	0.87	16089	0.969
ZNF805	-6	12	-1.12	0.13	1842	0.961	0.87	16088	0.969
NME8	-5.99	12	-1.12	0.13	1843	0.961	0.87	16087	0.969
LYZL4	-5.99	12	-1.12	0.131	1844	0.961	0.869	16086	0.969
RCAN2	-5.99	12	-1.12	0.131	1845	0.961	0.869	16085	0.969
DENND4B	-5.99	12	-1.12	0.131	1846	0.961	0.869	16084	0.969
YIPF5	-5.99	12	-1.12	0.131	1847	0.961	0.869	16083	0.969
AVIL	-5.99	12	-1.12	0.131	1848	0.961	0.869	16082	0.969
RPUSD1	-5.99	12	-1.12	0.131	1849	0.961	0.869	16081	0.969
DEFB113	-5.98	12	-1.12	0.131	1850	0.961	0.869	16080	0.969
OR4D10	-5.98	12	-1.12	0.131	1851	0.961	0.869	16079	0.969
THAP10	-5.98	12	-1.12	0.131	1852	0.961	0.869	16078	0.969
TMEM126B	-5.98	12	-1.12	0.131	1853	0.961	0.869	16077	0.969
LSM5	-5.18	9	-1.12	0.131	1854	0.961	0.869	16076	0.969
FAM115C	-5.98	12	-1.12	0.131	1855	0.961	0.869	16075	0.969
CAPN1	-5.98	12	-1.12	0.131	1856	0.961	0.869	16074	0.969
ABCG8	-5.98	12	-1.12	0.131	1857	0.961	0.869	16073	0.969
PPP1R9A	-5.97	12	-1.12	0.131	1858	0.961	0.869	16072	0.969
SALL3	-5.97	12	-1.12	0.131	1859	0.961	0.869	16071	0.969
CHP1	-5.97	12	-1.12	0.131	1860	0.961	0.869	16070	0.969
KLHL31	-5.97	12	-1.12	0.132	1861	0.961	0.868	16069	0.969
CLDN20	-5.97	12	-1.12	0.132	1862	0.961	0.868	16068	0.969
EXOC2	-5.97	12	-1.12	0.132	1863	0.961	0.868	16067	0.969
PFDN5	-5.97	12	-1.12	0.132	1864	0.961	0.868	16066	0.969
ZNF445	-5.96	12	-1.12	0.132	1865	0.961	0.868	16065	0.969
SEH1L	-5.96	12	-1.12	0.132	1866	0.961	0.868	16064	0.969
C2orf78	-5.96	12	-1.12	0.132	1867	0.961	0.868	16063	0.969
FUNDC2	-5.95	12	-1.12	0.132	1868	0.961	0.868	16062	0.969
RNF207	-5.95	12	-1.12	0.132	1869	0.961	0.868	16061	0.969
AMDHD2	-5.95	12	-1.12	0.132	1870	0.961	0.868	16060	0.969
TGM3	-5.95	12	-1.11	0.132	1871	0.961	0.868	16059	0.969
SLC6A3	-5.95	12	-1.11	0.132	1872	0.961	0.868	16058	0.969
TMEM52	-5.95	12	-1.11	0.133	1873	0.961	0.867	16057	0.969
MAGI2	-5.95	12	-1.11	0.133	1874	0.961	0.867	16056	0.969
C16orf3	-5.95	12	-1.11	0.133	1875	0.961	0.867	16055	0.969
FAM167B	-5.95	12	-1.11	0.133	1876	0.961	0.867	16054	0.969
SSBP2	-5.95	12	-1.11	0.133	1877	0.961	0.867	16053	0.969
YBX1	-5.95	12	-1.11	0.133	1878	0.961	0.867	16052	0.969
KIAA1875	-5.95	12	-1.11	0.133	1879	0.961	0.867	16051	0.969
HIST1H2BB	-2.97	3	-1.11	0.133	1880	0.961	0.867	16050	0.969
GNB1	-5.94	12	-1.11	0.133	1881	0.961	0.867	16049	0.969
LBX2	-5.94	12	-1.11	0.133	1882	0.961	0.867	16048	0.969
GAS2	-5.94	12	-1.11	0.133	1883	0.961	0.867	16047	0.969
DDX39B	-5.94	12	-1.11	0.133	1884	0.961	0.867	16046	0.969
NARFL	-5.94	12	-1.11	0.133	1885	0.961	0.867	16045	0.969
LSM1	-5.94	12	-1.11	0.133	1886	0.961	0.867	16044	0.969
LPIN3	-5.93	12	-1.11	0.133	1887	0.961	0.867	16043	0.969
RBM26	-5.93	12	-1.11	0.133	1888	0.961	0.867	16042	0.969
TEKT5	-5.93	12	-1.11	0.133	1889	0.961	0.867	16041	0.969
HDAC8	-5.93	12	-1.11	0.133	1890	0.961	0.867	16040	0.969
PALLD	-5.93	12	-1.11	0.133	1891	0.961	0.867	16039	0.969
KIAA0319L	-5.93	12	-1.11	0.133	1892	0.961	0.867	16038	0.969
C8orf37	-5.93	12	-1.11	0.134	1893	0.961	0.866	16037	0.969
AGAP2	-5.92	12	-1.11	0.134	1894	0.961	0.866	16036	0.969
HOXB13	-5.92	12	-1.11	0.134	1895	0.961	0.866	16035	0.969
WNT7A	-5.92	12	-1.11	0.134	1896	0.961	0.866	16034	0.969
PPP1R27	-5.92	12	-1.11	0.134	1897	0.961	0.866	16033	0.969
LPIN2	-5.92	12	-1.11	0.134	1898	0.961	0.866	16032	0.968
ASIP	-5.92	12	-1.11	0.134	1899	0.961	0.866	16031	0.968
RFWD3	-5.91	12	-1.11	0.134	1900	0.961	0.866	16030	0.968
TMEM206	-5.12	9	-1.11	0.134	1901	0.961	0.866	16029	0.968
MYF6	-5.91	12	-1.11	0.134	1902	0.961	0.866	16028	0.968
WNT10B	-5.91	12	-1.11	0.135	1903	0.961	0.865	16027	0.968
MTA3	-5.91	12	-1.11	0.135	1904	0.961	0.865	16026	0.968
HCK	-5.91	12	-1.1	0.135	1905	0.961	0.865	16025	0.968
SLC25A13	-5.9	12	-1.1	0.135	1906	0.961	0.865	16024	0.968
ELAVL4	-5.9	12	-1.1	0.135	1907	0.961	0.865	16023	0.968
BPTF	-5.9	12	-1.1	0.135	1908	0.961	0.865	16022	0.968
KBTBD4	-5.11	9	-1.1	0.135	1909	0.961	0.865	16021	0.968
TAGLN2	-5.9	12	-1.1	0.135	1910	0.961	0.865	16020	0.968
CD4	-5.89	12	-1.1	0.135	1911	0.961	0.865	16019	0.968
CCDC110	-5.89	12	-1.1	0.135	1912	0.961	0.865	16018	0.968
HSPH1	-5.89	12	-1.1	0.135	1913	0.961	0.865	16017	0.968
REV1	-5.89	12	-1.1	0.135	1914	0.961	0.865	16016	0.968
RXFP2	-5.89	12	-1.1	0.136	1915	0.961	0.864	16015	0.968
CASQ2	-5.88	12	-1.1	0.136	1916	0.961	0.864	16014	0.968
RMI2	-5.88	12	-1.1	0.136	1917	0.961	0.864	16013	0.968
MRPL51	-5.88	12	-1.1	0.136	1918	0.961	0.864	16012	0.968
NRG1	-5.88	12	-1.1	0.136	1919	0.961	0.864	16011	0.968
RAB8B	-5.88	12	-1.1	0.136	1920	0.961	0.864	16010	0.968
CPNE6	-5.88	12	-1.1	0.136	1921	0.961	0.864	16009	0.968
ANKRD13C	-5.88	12	-1.1	0.136	1922	0.961	0.864	16008	0.968
RNASE1	-5.88	12	-1.1	0.136	1923	0.961	0.864	16007	0.968
CRTC3	-5.88	12	-1.1	0.136	1924	0.961	0.864	16006	0.968
MXD1	-5.88	12	-1.1	0.136	1925	0.961	0.864	16005	0.968
PSMB9	-5.87	12	-1.1	0.136	1926	0.961	0.864	16004	0.968
CAST	-5.87	12	-1.1	0.136	1927	0.961	0.864	16003	0.968
MCMBP	-5.87	12	-1.1	0.136	1928	0.961	0.864	16002	0.968
KIF18A	-5.87	12	-1.1	0.136	1929	0.961	0.864	16001	0.968
C14orf119	-5.87	12	-1.1	0.136	1930	0.961	0.864	16000	0.968
EEF1D	-5.87	12	-1.1	0.136	1931	0.961	0.864	15999	0.968
SRSF5	-5.87	12	-1.1	0.136	1932	0.961	0.864	15998	0.968
ZDHHC7	-5.87	12	-1.1	0.136	1933	0.961	0.864	15997	0.968
ATP6V1E1	-5.86	12	-1.1	0.137	1934	0.961	0.863	15996	0.968
FAM195A	-5.86	12	-1.09	0.137	1935	0.961	0.863	15995	0.967
KATNA1	-5.86	12	-1.09	0.137	1936	0.961	0.863	15994	0.967
ERLEC1	-5.86	12	-1.09	0.137	1937	0.961	0.863	15993	0.967
NBEAL2	-5.85	12	-1.09	0.137	1938	0.961	0.863	15992	0.967
C16orf90	-5.85	12	-1.09	0.137	1939	0.961	0.863	15991	0.967
YY2	-5.85	12	-1.09	0.137	1940	0.961	0.863	15990	0.967
C7orf61	-5.85	12	-1.09	0.137	1941	0.961	0.863	15989	0.967
KRT222	-5.85	12	-1.09	0.137	1942	0.961	0.863	15988	0.967
CHTF18	-5.85	12	-1.09	0.137	1943	0.961	0.863	15987	0.967
CSRP2BP	-5.85	12	-1.09	0.137	1944	0.961	0.863	15986	0.967
PPP1R18	-5.85	12	-1.09	0.137	1945	0.961	0.863	15985	0.967
AP3B1	-5.85	12	-1.09	0.137	1946	0.961	0.863	15984	0.967
TSSC1	-5.85	12	-1.09	0.137	1947	0.961	0.863	15983	0.967
CA13	-5.85	12	-1.09	0.137	1948	0.961	0.863	15982	0.967
HAPLN1	-5.84	12	-1.09	0.138	1949	0.961	0.862	15981	0.967
CPA5	-5.84	12	-1.09	0.138	1950	0.961	0.862	15980	0.967
COL11A2	-5.84	12	-1.09	0.138	1951	0.961	0.862	15979	0.967
MPC2	-5.84	12	-1.09	0.138	1952	0.961	0.862	15978	0.967
SGK2	-5.84	12	-1.09	0.138	1953	0.961	0.862	15977	0.967
DNAJA3	-5.84	12	-1.09	0.138	1954	0.961	0.862	15976	0.967
MAP3K11	-5.84	12	-1.09	0.138	1955	0.961	0.862	15975	0.967
WFDC6	-5.84	12	-1.09	0.138	1956	0.961	0.862	15974	0.967
ME3	-5.83	12	-1.09	0.138	1957	0.961	0.862	15973	0.967
KLF17	-5.83	12	-1.09	0.138	1958	0.961	0.862	15972	0.967
SLA	-5.83	12	-1.09	0.138	1959	0.961	0.862	15971	0.967
TNFRSF6B	-5.83	12	-1.09	0.138	1960	0.961	0.862	15970	0.967
PAK1	-5.83	12	-1.09	0.138	1961	0.961	0.862	15969	0.967
KIAA0430	-5.83	12	-1.09	0.138	1962	0.961	0.862	15968	0.967
PKLR	-5.83	12	-1.09	0.138	1963	0.961	0.862	15967	0.967
DEF6	-5.83	12	-1.09	0.138	1964	0.961	0.862	15966	0.967
TCF24	-5.82	12	-1.09	0.138	1965	0.961	0.862	15965	0.967
SKA2	-5.82	12	-1.09	0.138	1966	0.961	0.862	15964	0.967
STYK1	-5.82	12	-1.09	0.139	1967	0.961	0.861	15963	0.967
RABEP2	-5.82	12	-1.09	0.139	1968	0.961	0.861	15962	0.967
STK16	-5.82	12	-1.09	0.139	1969	0.961	0.861	15961	0.967
OR52N2	-5.82	12	-1.09	0.139	1970	0.961	0.861	15960	0.967
MDN1	-5.82	12	-1.09	0.139	1971	0.961	0.861	15959	0.967
C5orf30	-5.82	12	-1.09	0.139	1972	0.961	0.861	15958	0.967
CLCNKB	-5.82	12	-1.09	0.139	1973	0.961	0.861	15957	0.967
C14orf183	-5.81	12	-1.09	0.139	1974	0.961	0.861	15956	0.967
CD2AP	-5.81	12	-1.08	0.139	1975	0.961	0.861	15955	0.967
ARFIP1	-5.81	12	-1.08	0.139	1976	0.961	0.861	15954	0.967
C16orf11	-5.81	12	-1.08	0.139	1977	0.961	0.861	15953	0.967
IKBKB	-5.81	12	-1.08	0.139	1978	0.961	0.861	15952	0.967
HOXB2	-5.81	12	-1.08	0.139	1979	0.961	0.861	15951	0.967
FIS1	-5.81	12	-1.08	0.139	1980	0.961	0.861	15950	0.967
NCK2	-5.81	12	-1.08	0.139	1981	0.961	0.861	15949	0.967
THADA	-5.81	12	-1.08	0.139	1982	0.961	0.861	15948	0.967
ENTHD1	-5.81	12	-1.08	0.139	1983	0.961	0.861	15947	0.967
POSTN	-5.8	12	-1.08	0.139	1984	0.961	0.861	15946	0.967
NOS1AP	-5.8	12	-1.08	0.14	1985	0.961	0.86	15945	0.967
HK2	-5.8	12	-1.08	0.14	1986	0.961	0.86	15944	0.967
NPRL2	-5.8	12	-1.08	0.14	1987	0.961	0.86	15943	0.967
VASH1	-5.8	12	-1.08	0.14	1988	0.961	0.86	15942	0.967
IGF2BP3	-5.79	12	-1.08	0.14	1989	0.961	0.86	15941	0.967
BPIFA3	-5.79	12	-1.08	0.14	1990	0.961	0.86	15940	0.967
PPP6R2	-5.79	12	-1.08	0.14	1991	0.961	0.86	15939	0.967
CLEC7A	-5.79	12	-1.08	0.14	1992	0.961	0.86	15938	0.967
FRYL	-5.79	12	-1.08	0.14	1993	0.961	0.86	15937	0.967
ZFC3H1	-5.79	12	-1.08	0.14	1994	0.961	0.86	15936	0.967
HNRNPM	-5.79	12	-1.08	0.14	1995	0.961	0.86	15935	0.967
SLC9A4	-5.79	12	-1.08	0.14	1996	0.961	0.86	15934	0.967
LRRC19	-2.89	3	-1.08	0.14	1997	0.961	0.86	15933	0.967
RPP30	-5.78	12	-1.08	0.141	1998	0.961	0.859	15932	0.967
RASAL2	-5.78	12	-1.08	0.141	1999	0.961	0.859	15931	0.967
[truncated: 15,930 more rows]
